# Supplementary material for: Cell-type-specific nuclei purification from whole animals for genome-wide expression and chromatin profiling
Source: HighWire-hosted journal article supplement (doi:10.1101/gr.131748.111), 2012-01-04
Supplement: Steiner131748_SupTable1_r2.xlsx [file Steiner131748_SupTable1_r2.xlsx]

## Sheet: wild type
Supplemental Table 1
Related to Figure 5, Figure 6 and Figure 7
List of 20,301 C. elegans genes analyzed in this study.
Results from the Cyber-T analysis comparing expression levels in total nuclei and affinity-purified nuclei from wild type background are listed, also containing input expression values offset by 2.641 to bring all values above 0.
Flags for genes for the following datasets are shown:
	Genes found in this study to be significantly enriched based on the Cyber-T analysis (q<0.01), used in Figure 5D-G, Figure 6 and Figure 7
	Muscle-enriched gene sets as reported in (Fox et al., 2007; Fukushige et al., 2006; Roy et al., 2002), used in Figure 5D-G.
	Genes used as tissue-specific markers for muscle, intestine and germline to generate Figure 5A.
Also listed are annotations for the 200 most enriched and depleted genes extracted from WormBase and used to create Figure 5B, and Entrez IDs or gene names used as input for GO term analysis (Figure 5C; note that the GeneCodis program does not accept WBGene names).
IDs for 15 genes that were not recognized by the GeneCodis program and were therefore excluded from the analysis are also flagged.
Row#	Lab_0	C_1	C_2	C_3	C_4	E_5	E_6	E_7	E_8	C#obs	E#obs	C.Mn	E.Mn	C.SD	E.SD	ClnMn	ElnMn	ClnSD	ElnSD	CBySD	EBySD	CBylnSD	EBylnSD	Bayes.t	Bayes.t.df	t.var	lnt	Bayes.lnt.df	lnt.var	Bayes.p	Bayes.lnp	fold	q-value
	Gene	Control column #1; input_1	Control column #2; input_2	Control column #3; input_3	Control column #4; input_4	Experimental column #1; pull-down_1	Experimental column #2; pull-down_2	Experimental column #3; pull-down_3	Experimental column #4; pull-down_4	The number of control observations greater than 0	The number of experimental observations greater than 0	The mean of the control observations	The mean of the experimental observations	The standard deviation of the control observations	The standard deviation of the experimental observations	The mean of the log transformed control observations	The mean of the log transformed experimental observations	The standard deviation of the log transformed control observations	The standard devation of the log transformed control observations	The Bayesian or regularized standard deviation of the control observations	The Bayesian or regularized standard deviation of the experimental observations	The Bayesian or regularized standard deviation of the log transformed control observations	The Bayesian or regularized standard deviation of the log transformed experimental observations	The t-test statistic calculated from control and experimental data using the standard deviation (C.SD, E.SD)	The degrees of freedom for the t-test statistic plus that associated with the Bayesian estimate	The ratio of the variances of the control and experimental treatments	The t-test statistic calculated from log transformed control and experimental data using the standard deviation (ClnSD and ElnSD)	The degrees of freedom for the t-tests statistic calculated from log transformed data plus that associated with the Bayesian estimate	The ratio of the variances calculated from log transformed data of the control and experimental treatments	The p-value associated with the t-test on control and experimental data using the Bayesian or regularized standard deviations.	The p-value associated with the t-test on log transformed control and experimental data using the Bayesian or regularized standard deviations	The fold change between experimental and control, negative numbers indicate lower expression in the experimental		significantly enriched muscle genes (q<0.01)	Fox et al.	Fukushige et al.	Roy et al.	muscle markers	intestine markers	germline markes	WormBase annotations	Entrez/gene IDs used for GeneCodis	Genes not recogized by Genecodis
1	WBGene00000001	4.548	4.2509	4.359	4.4424	3.6449	3.4454	3.665	3.881	4	4	4.40008	3.65908	0.125981	0.178086	1.48131	1.29632	0.0286485	0.0486558	0.207632	0.290048	0.0468725	0.0828555	-4.15468	24	1.95142	-3.88658	24	3.12469	0.000356183	0.000701445	-1.20251	0.00258692	0	0	0	0	0	0	0			0
2	WBGene00000002	2.6835	3.56433	2.69483	2.67033	2.467	2.87833	2.30517	2.2835	4	4	2.90325	2.4835	0.440836	0.275662	1.05791	0.905269	0.142094	0.106985	0.390701	0.30299	0.130792	0.117491	-1.69795	24	1.66277	-1.73639	24	1.23924	0.102447	0.0953172	-1.16902	0.129238	0	0	0	0	0	0	0			0
3	WBGene00000003	2.87256	3.19	3.17122	2.96278	3.28389	3.54189	3.31444	3.11656	4	4	3.04914	3.31419	0.156403	0.174952	1.11387	1.19718	0.0515148	0.0525219	0.312351	0.33145	0.110022	0.0980728	1.16396	24	1.12603	1.13049	24	1.25852	0.25588	0.269442	1.08693	0.230639	0	1	1	0	0	0	0			0
4	WBGene00000004	3.83433	4.12267	3.08033	3.298	3.54867	3.62267	2.97867	3.30267	4	4	3.58383	3.36317	0.478994	0.290546	1.26971	1.21	0.133955	0.0883987	0.363133	0.323938	0.109235	0.100173	-0.906932	24	1.25663	-0.805809	24	1.18912	0.373459	0.428266	-1.06561	0.288133	0	0	0	0	0	0	0			0
5	WBGene00000005	3.108	3.4495	3.54275	3.611	2.97625	2.3775	2.7065	3.08725	4	4	3.42781	2.78688	0.223248	0.316299	1.23027	1.01991	0.0668829	0.116613	0.348917	0.366505	0.0962154	0.113313	-2.53319	24	1.10335	-2.83027	24	1.38698	0.018251	0.00925396	-1.22998	0.0402962	0	0	0	0	0	0	0			0
6	WBGene00000006	3.1455	3.72367	3.29083	2.78983	5.2165	4.84183	4.8315	4.37433	4	4	3.23746	4.81604	0.386468	0.344663	1.16945	1.57001	0.11931	0.0722442	0.378937	0.289349	0.116267	0.0585276	6.6219	24	1.71509	6.1545	24	3.94631	7.54e-07	2.33e-06	1.4876	2.94e-05	1	0	1	0	0	0	0		171814	0
7	WBGene00000007	2.9602	3.3379	3.4434	2.9804	2.6426	2.7856	3.0482	2.958	4	4	3.18047	2.8586	0.246619	0.180567	1.15478	1.04882	0.0774502	0.0635757	0.379462	0.311303	0.11403	0.117361	-1.31159	24	1.48583	-1.29503	24	1.05927	0.202068	0.207632	-1.1126	0.198732	0	0	0	0	0	0	0			0
8	WBGene00000008	2.2664	2.0252	2.126	2.2234	2.3034	2.1152	2.0124	2.159	4	4	2.16025	2.1475	0.107498	0.120737	0.769285	0.763127	0.0501681	0.0559346	0.226279	0.258145	0.128123	0.126379	-0.0742834	24	1.30148	-0.0684363	24	1.0278	0.941401	0.946005	-1.00594	0.481036	0	0	0	0	0	0	0			0
9	WBGene00000009	1.4045	1.78675	1.696	1.51475	1.22325	1.291	1.4685	1.421	4	4	1.6005	1.35094	0.172799	0.11347	0.465901	0.298133	0.108776	0.0844754	0.216331	0.192878	0.133052	0.162356	-1.72213	24	1.25797	-1.59848	24	1.489	0.0979106	0.123021	-1.18473	0.125341	0	0	0	0	0	0	0			0
10	WBGene00000010	5.163	5.22429	4.83257	4.89943	5.02171	4.77786	4.52957	4.53386	4	4	5.02982	4.71575	0.192754	0.234676	1.61483	1.54999	0.0383452	0.049293	0.190004	0.261695	0.0370219	0.0569195	-1.94232	24	1.89699	-1.90993	24	2.36377	0.0639217	0.0681643	-1.0666	0.0947256	0	0	0	0	0	0	0			0
11	WBGene00000012	2.641	2.625	3.34	2.723	2.719	2.755	3.356	2.651	4	4	2.83225	2.87025	0.341211	0.326692	1.03599	1.04984	0.114453	0.108454	0.345493	0.345308	0.133411	0.12161	0.155588	24	1.00107	0.153514	24	1.2035	0.877659	0.879277	1.01342	0.463243	0	1	0	0	0	0	0			0
12	WBGene00000013	3.479	3.551	3.558	3.631	3.25	3.265	3.317	3.606	4	4	3.55475	3.3595	0.0621202	0.166822	1.26817	1.21089	0.0174766	0.0485958	0.310203	0.30313	0.0819477	0.0924349	-0.900349	24	1.04721	-0.927331	24	1.27233	0.376881	0.362987	-1.05812	0.28964	0	0	0	0	0	0	0			0
13	WBGene00000014	0.838	0.946	1.104	1.277	0.838	1.067	1.259	0.736	4	4	1.04125	0.975	0.191397	0.234528	0.0278009	-0.0470234	0.183305	0.240555	0.208714	0.221918	0.207249	0.231925	-0.434932	24	1.13053	-0.481134	24	1.25231	0.667498	0.634778	-1.06795	0.40141	0	0	0	0	0	0	0			0
14	WBGene00000015	2.139	1.548	1.761	1.349	2.008	1.159	1.673	1.801	4	4	1.69925	1.66025	0.338006	0.36155	0.515637	0.486914	0.196101	0.238336	0.278434	0.278029	0.155545	0.171281	-0.198232	24	1.00291	-0.248285	24	1.21257	0.844533	0.806026	-1.02349	0.45439	0	0	0	0	0	0	0			0
15	WBGene00000016	3.218	3.829	3.596	3.439	3.301	3.628	3.469	2.821	4	4	3.5205	3.30475	0.257566	0.349045	1.25659	1.19097	0.0732815	0.109597	0.316163	0.358544	0.0902477	0.100883	-0.902663	24	1.28606	-0.969649	24	1.24959	0.375675	0.341893	-1.06528	0.289147	0	0	0	0	0	0	0			0
16	WBGene00000017	3.344	3.505	3.671	3.093	2.881	2.624	2.741	2.771	4	4	3.40325	2.75425	0.246177	0.105652	1.22274	1.01259	0.0731057	0.0384276	0.307511	0.320373	0.0961925	0.114013	-2.92293	24	1.0854	-2.81756	24	1.40483	0.0074472	0.00953191	-1.23564	0.0216823	0	0	0	0	0	0	0			0
17	WBGene00000018	3.95996	4.06498	3.41158	3.59437	4.03565	4.13117	3.90169	3.94433	4	4	3.75772	4.00321	0.306486	0.101978	1.3213	1.38685	0.0820846	0.0253916	0.325729	0.28005	0.0857629	0.0725041	1.14294	24	1.35283	1.16749	24	1.39918	0.264338	0.254482	1.06533	0.235206	0	0	1	0	0	0	0			0
18	WBGene00000019	2.30194	2.63818	2.78334	2.32682	1.91066	2.00958	2.30252	2.0358	4	4	2.51257	2.06464	0.236617	0.167491	0.917999	0.722567	0.0937641	0.0791719	0.292124	0.271702	0.118819	0.123027	-2.24557	24	1.15598	-2.28526	24	1.07209	0.03421	0.031429	-1.21695	0.0620537	0	0	0	0	0	0	0			0
19	WBGene00000020	3.31241	3.82244	3.40485	3.15777	3.24543	3.4818	3.31403	3.23072	4	4	3.42437	3.31799	0.284284	0.115079	1.22841	1.19892	0.0811903	0.0342647	0.369304	0.306962	0.0973659	0.0908253	-0.443027	24	1.44743	-0.442982	24	1.14921	0.661714	0.661746	-1.03206	0.399536	0	0	0	0	0	0	0			0
20	WBGene00000022	4.66121	3.36252	3.7988	3.21213	4.50782	2.93816	3.70311	3.43033	4	4	3.75867	3.64485	0.651106	0.656643	1.3134	1.28136	0.166399	0.177922	0.432921	0.448705	0.109607	0.119804	-0.365079	24	1.07425	-0.394644	24	1.19471	0.71825	0.696591	-1.03123	0.417339	0	0	0	0	0	0	0			0
21	WBGene00000023	2.17339	2.54103	2.59283	2.16975	1.91686	2.02719	2.2051	1.91134	4	4	2.36925	2.01512	0.229246	0.137433	0.859055	0.698979	0.0968929	0.0669221	0.282218	0.267126	0.118574	0.13517	-1.82262	24	1.11618	-1.78052	24	1.29953	0.0808447	0.0876546	-1.17573	0.1109	0	0	0	0	0	0	0			0
22	WBGene00000024	1.7295	2.36325	2.54237	1.76875	2.115	2.406	2.56188	1.76287	4	4	2.10097	2.21144	0.413114	0.351743	0.72781	0.783676	0.197347	0.165056	0.341179	0.325381	0.15891	0.145425	0.468623	24	1.09947	0.518698	24	1.19406	0.643568	0.608722	1.05258	0.393342	0	0	0	0	0	0	0			0
23	WBGene00000025	1.76171	1.85971	1.925	1.55529	1.88559	2.10188	2.08629	1.75659	4	4	1.77543	1.95759	0.161371	0.166304	0.570823	0.668959	0.0935156	0.08607	0.216523	0.244023	0.134635	0.132553	1.11675	24	1.27015	1.03883	24	1.03165	0.275157	0.309238	1.1026	0.241143	0	0	0	0	0	0	0			0
24	WBGene00000026	1.732	1.932	1.562	1.402	1.538	1.946	2.101	1.511	4	4	1.657	1.774	0.227523	0.295171	0.497925	0.562861	0.137534	0.166214	0.236409	0.267379	0.143599	0.152657	0.655638	24	1.27916	0.619672	24	1.13013	0.518294	0.541313	1.07061	0.348771	0	0	0	0	0	0	0			0
25	WBGene00000027	2.0635	1.8915	1.858	1.8105	2.2405	2.299	1.855	2.1835	4	4	1.90587	2.1445	0.110213	0.198677	0.643719	0.759497	0.0567111	0.0967249	0.224316	0.285725	0.129148	0.137675	1.3138	24	1.62246	1.22666	24	1.1364	0.201333	0.231849	1.1252	0.198261	0	0	1	0	0	0	0			0
26	WBGene00000028	1.446	1.543	1.572	1.291	1.225	1.425	1.569	1.266	4	4	1.463	1.37125	0.126694	0.157544	0.377574	0.310853	0.0889641	0.113474	0.217948	0.222897	0.155071	0.15941	-0.588625	24	1.04593	-0.600025	24	1.05674	0.561613	0.554113	-1.06691	0.365086	0	0	0	0	0	0	0			0
27	WBGene00000029	2.25833	3.30033	2.753	2.28917	2.4175	3.49783	2.93267	2.28183	4	4	2.65021	2.78246	0.488926	0.553216	0.962382	1.00894	0.178912	0.194425	0.391198	0.42765	0.149921	0.150078	0.45636	24	1.19505	0.438971	24	1.0021	0.652234	0.664609	1.0499	0.396173	0	0	1	0	0	0	0			0
28	WBGene00000030	2.19467	3.21078	2.79222	2.27511	2.42889	3.39733	2.84789	2.31656	4	4	2.61819	2.74767	0.475578	0.489758	0.950353	0.999271	0.178927	0.173337	0.383682	0.379887	0.151347	0.146678	0.479588	24	1.02008	0.464208	24	1.06468	0.635862	0.646682	1.04945	0.390943	0	0	0	0	0	0	0			0
29	WBGene00000031	2.23913	3.34538	2.803	2.2805	2.58087	3.52263	2.92462	2.351	4	4	2.667	2.84478	0.519983	0.509678	0.967187	1.03384	0.189881	0.174856	0.402655	0.39839	0.145284	0.142079	0.627723	24	1.02153	0.655959	24	1.04562	0.536113	0.51809	1.06666	0.355733	0	0	1	0	0	0	0			0
30	WBGene00000032	1.99975	2.72475	2.42425	1.88725	2.19	2.916	2.49475	2.0085	4	4	2.259	2.40231	0.387143	0.396898	0.80401	0.866423	0.170133	0.162475	0.321997	0.338401	0.162493	0.137553	0.613606	24	1.10449	0.586316	24	1.39551	0.545248	0.563138	1.06344	0.359243	0	0	0	0	0	0	0			0
31	WBGene00000033	1.526	2.959	2.324	1.911	1.398	2.679	2.342	1.876	4	4	2.18	2.07375	0.613094	0.557981	0.749604	0.700158	0.281937	0.284309	0.412509	0.38671	0.180898	0.189241	-0.375822	24	1.13788	-0.377748	24	1.09436	0.710351	0.708938	-1.05124	0.414805	0	0	0	0	0	0	0			0
32	WBGene00000034	2.72875	3.38775	3.03525	2.49625	3.14375	3.806	3.41025	2.751	4	4	2.912	3.27775	0.386418	0.444232	1.06227	1.18019	0.132163	0.136794	0.378474	0.389615	0.131923	0.118043	1.3467	24	1.05974	1.33216	24	1.24898	0.190656	0.19532	1.1256	0.191592	0	0	1	0	0	0	0			0
33	WBGene00000035	3.17773	3.57009	3.15864	3.03655	4.89218	4.73155	4.50245	4.20418	4	4	3.23575	4.58259	0.231502	0.298691	1.1724	1.52065	0.0697654	0.0658927	0.337642	0.309125	0.108169	0.0632328	5.88426	24	1.19301	5.55876	24	2.92631	4.53e-06	1.02e-05	1.41624	0.000112288	1	1	1	0	0	0	0		181706	0
34	WBGene00000036	3.16171	3.82014	3.3715	3.04586	4.44829	4.40193	4.13707	3.89707	4	4	3.3498	4.22109	0.341297	0.255843	1.20514	1.43869	0.0993887	0.0613282	0.352101	0.294173	0.102249	0.0689655	3.79797	24	1.43262	3.78743	24	2.19814	0.000876508	0.000899998	1.2601	0.00481798	1	0	0	0	0	0	0		171905	0
35	WBGene00000037	2.804	3.818	2.87707	2.77657	2.91136	3.73743	2.65571	2.70243	4	4	3.06891	3.00173	0.501191	0.502901	1.11219	1.08947	0.15243	0.157737	0.422479	0.414114	0.12835	0.131743	-0.227112	24	1.04081	-0.247057	24	1.05357	0.82226	0.806966	-1.02238	0.448402	0	0	0	0	0	0	0			0
36	WBGene00000038	2.12533	2.72633	2.12533	2.097	1.98367	2.89767	2.15367	1.86933	4	4	2.2685	2.22608	0.305514	0.462711	0.812831	0.785402	0.126909	0.194534	0.324443	0.356937	0.130865	0.156597	-0.175873	24	1.21034	-0.268808	24	1.43191	0.861869	0.790375	-1.01905	0.458566	0	0	0	0	0	0	0			0
37	WBGene00000039	3.0044	4.4132	3.292	3.01613	3.17667	4.31333	3.2698	3.10167	4	4	3.43143	3.46537	0.667867	0.569479	1.22004	1.23355	0.181355	0.153629	0.468105	0.422964	0.127732	0.128545	0.107573	24	1.22484	0.149167	24	1.01276	0.915228	0.882668	1.00989	0.473715	0	0	0	0	0	0	0			0
38	WBGene00000040	4.552	4.44262	4.71913	4.53812	4.35072	4.08925	4.56509	4.54553	4	4	4.56297	4.38765	0.114898	0.221223	1.51774	1.47782	0.0250472	0.0511527	0.210893	0.297097	0.0428419	0.0650212	-0.962404	24	1.9846	-1.02524	24	2.30341	0.345444	0.315475	-1.03996	0.27489	0	0	0	0	0	0	0			0
39	WBGene00000041	5.34171	5.26471	5.17646	5.23082	5.83493	5.75589	5.53629	5.48564	4	4	5.25343	5.65319	0.0691769	0.168637	1.65882	1.73189	0.0131498	0.0298145	0.158915	0.238248	0.0321296	0.0423803	2.79176	24	2.24764	2.74789	24	1.73987	0.0101209	0.0112023	1.07609	0.0269101	0	1	0	0	0	0	0			0
40	WBGene00000042	2.0245	2.23175	1.84725	1.60375	2.057	2.31625	1.8415	1.84225	4	4	1.92681	2.01425	0.266602	0.225432	0.648538	0.695692	0.140564	0.109365	0.253769	0.280718	0.146389	0.143264	0.46212	24	1.22366	0.460422	24	1.0441	0.648157	0.649358	1.04538	0.394898	0	0	0	0	0	0	0			0
41	WBGene00000043	2.545	2.635	2.896	2.397	2.937	2.196	2.534	2.426	4	4	2.61825	2.52325	0.209557	0.309761	0.960141	0.920017	0.0791282	0.12082	0.3206	0.348088	0.126256	0.131163	-0.401493	24	1.17883	-0.44078	24	1.07924	0.69161	0.663317	-1.03765	0.408912	0	0	0	0	0	0	0			0
42	WBGene00000044	1.988	2.04325	2.189	2.0915	2.012	2.08175	2.1715	2.346	4	4	2.07794	2.15281	0.0852659	0.144394	0.730749	0.765117	0.0407966	0.0662104	0.236562	0.258373	0.119709	0.13421	0.427476	24	1.1929	0.382203	24	1.25694	0.672844	0.705674	1.03603	0.403149	0	0	1	0	0	0	0			0
43	WBGene00000045	2.661	2.3595	2.281	2.221	2.3215	1.889	2.037	1.741	4	4	2.38063	1.99713	0.19533	0.247723	0.864931	0.68605	0.0797846	0.12227	0.291634	0.29221	0.120656	0.143941	-1.85786	24	1.00395	-1.9048	24	1.4232	0.0754998	0.0688579	-1.19203	0.106248	0	0	0	0	0	0	0			0
44	WBGene00000046	2.45	2.215	2.347	2.555	2.702	2.733	2.805	2.361	4	4	2.39175	2.65025	0.145243	0.197601	0.870633	0.97247	0.0610509	0.0771942	0.279182	0.282231	0.118388	0.116834	1.30232	24	1.02196	1.22452	24	1.02679	0.205168	0.23264	1.10808	0.200682	0	0	0	0	0	0	0			0
45	WBGene00000047	2.1245	2.7465	2.3725	2.12483	3.64583	3.77117	3.848	3.50517	4	4	2.34208	3.69254	0.293836	0.150156	0.845375	1.30569	0.121647	0.0408943	0.33238	0.309392	0.12448	0.0829022	5.94794	24	1.15412	6.15561	24	2.25458	3.87e-06	2.33e-06	1.57661	0.000100156	1	1	1	0	0	0	0		181246	0
46	WBGene00000048	2.38	2.681	2.484	2.252	1.896	2.51	2.14	1.981	4	4	2.44925	2.13175	0.181309	0.271689	0.893745	0.751109	0.073548	0.123386	0.263922	0.302346	0.121889	0.12773	-1.58223	24	1.31237	-1.61576	24	1.09813	0.126688	0.119218	-1.14894	0.147695	0	0	0	0	0	0	0			0
47	WBGene00000049	1.41817	1.6135	1.582	1.6365	1.38783	1.47033	1.49817	1.28933	4	4	1.56254	1.41142	0.0988085	0.09391	0.444755	0.3429	0.0650925	0.0675459	0.205866	0.228434	0.132051	0.148332	-0.982892	24	1.23127	-1.02576	24	1.26179	0.335466	0.315233	-1.10707	0.270284	0	0	0	0	0	0	0			0
48	WBGene00000050	2.528	2.592	2.865	2.6655	2.523	1.9895	2.3275	2.0785	4	4	2.66262	2.22962	0.146146	0.242313	0.978205	0.797443	0.0540904	0.107951	0.313617	0.282312	0.10958	0.127948	-2.05229	24	1.23407	-2.14605	24	1.36333	0.0512014	0.0421899	-1.1942	0.0817137	0	0	0	0	0	0	0			0
49	WBGene00000051	2.53538	2.87613	2.7345	2.39175	2.56925	2.79137	2.846	2.736	4	4	2.63444	2.73566	0.213804	0.119682	0.96619	1.00564	0.0814015	0.0443718	0.336876	0.276103	0.119477	0.107576	0.464768	24	1.48867	0.490762	24	1.23349	0.646286	0.628052	1.03842	0.394292	0	0	0	0	0	0	0			0
50	WBGene00000053	1.913	2.838	2.532	2.209	2.282	2.331	2.342	2.036	4	4	2.373	2.24775	0.400001	0.143556	0.85333	0.808335	0.170607	0.0658735	0.333331	0.275757	0.150392	0.116877	-0.579043	24	1.46117	-0.472467	24	1.65574	0.567955	0.640862	-1.05572	0.367271	0	0	0	0	0	0	0			0
51	WBGene00000054	2.0798	1.9868	1.8962	2.044	2.693	2.634	2.7536	2.646	4	4	2.0017	2.68165	0.0800857	0.0543049	0.693389	0.986279	0.0403662	0.0201603	0.256539	0.305364	0.121067	0.101839	3.40979	24	1.41686	3.70271	24	1.41327	0.00230153	0.00111275	1.33969	0.00948052	1	0	1	0	0	0	0		191602	0
52	WBGene00000055	2.55175	2.56925	2.4445	2.382	3.207	3.22775	3.1015	3.12475	4	4	2.48687	3.16525	0.0890483	0.0615186	0.910544	1.15209	0.0359443	0.0194402	0.289182	0.302708	0.116928	0.101536	3.24086	24	1.09573	3.11954	24	1.32615	0.00347838	0.00466348	1.27278	0.0127281	0	1	0	0	0	0	0			0
53	WBGene00000056	1.78233	2.03133	2.18367	2.07433	1.659	1.64767	1.604	1.71433	4	4	2.01792	1.65625	0.169642	0.0454055	0.699315	0.504275	0.0864422	0.027356	0.254964	0.215503	0.123861	0.135415	-2.16672	24	1.39976	-2.12557	24	1.19528	0.0404067	0.044027	-1.21836	0.069766	0	0	0	0	0	0	0			0
54	WBGene00000057	1.86275	1.92825	1.87475	1.628	1.745	2.15075	1.957	1.78975	4	4	1.82344	1.91063	0.133367	0.184258	0.598624	0.644015	0.0756839	0.0949335	0.244188	0.223506	0.127531	0.123749	0.52676	24	1.19363	0.510871	24	1.06206	0.603196	0.614109	1.04781	0.379553	0	0	1	0	0	0	0			0
55	WBGene00000058	2.43289	3.04878	2.61311	2.446	2.419	2.82633	2.31489	2.136	4	4	2.63519	2.42406	0.287669	0.292544	0.964704	0.880158	0.10517	0.117748	0.349454	0.3533	0.126419	0.135446	-0.849774	24	1.02213	-0.912648	24	1.14793	0.403849	0.370505	-1.0871	0.301521	0	0	0	0	0	0	0			0
56	WBGene00000059	2.74714	2.80071	2.54729	2.35243	2.38871	2.63057	2.352	2.27957	4	4	2.61189	2.41271	0.204485	0.152152	0.957728	0.879302	0.0795255	0.0617434	0.31562	0.303163	0.126725	0.121185	-0.91025	24	1.08387	-0.894541	24	1.09352	0.371742	0.379917	-1.08255	0.287448	0	0	0	0	0	0	0			0
57	WBGene00000060	1.7045	1.874	1.8365	1.7815	1.6525	1.7075	1.771	1.5235	4	4	1.79913	1.66362	0.0736381	0.105219	0.586666	0.507469	0.04123	0.0642059	0.238301	0.212573	0.133109	0.133829	-0.848639	24	1.25671	-0.839161	24	1.01085	0.404468	0.40966	-1.08145	0.30178	0	0	0	0	0	0	0			0
58	WBGene00000061	2.591	2.625	2.683	2.493	1.846	2.885	2.067	2.336	4	4	2.598	2.2835	0.0796409	0.44827	0.954387	0.811771	0.0308333	0.191109	0.310418	0.364657	0.114817	0.154294	-1.31346	24	1.37999	-1.48305	24	1.80588	0.201447	0.151074	-1.13773	0.198279	0	0	0	0	0	0	0			0
59	WBGene00000062	2.05638	2.20325	1.897	2.15762	2.122	2.63175	2.27312	2.60913	4	4	2.07856	2.409	0.135714	0.251991	0.73004	0.875045	0.0664491	0.105802	0.24454	0.307403	0.121563	0.123565	1.68245	24	1.58021	1.67309	24	1.03322	0.105449	0.107296	1.15897	0.131623	0	0	0	0	0	0	0			0
60	WBGene00000063	5.207	5.569	5.34067	5.47	6.14533	6.202	6.14	6.011	4	4	5.39667	6.12458	0.157254	0.0807522	1.68546	1.81225	0.0292045	0.0132407	0.181636	0.166676	0.0331158	0.0269409	5.90552	24	1.18756	5.93966	24	1.51093	4.3e-06	3.95e-06	1.13488	0.000107873	1	0	0	1	1	0	0		179535	0
61	WBGene00000064	5.63167	5.75633	5.818	5.824	6.44767	6.28333	6.25967	6.131	4	4	5.7575	6.28042	0.0892896	0.130047	1.75041	1.83728	0.0155936	0.0206687	0.12945	0.174638	0.0229653	0.0278679	4.81099	24	1.82001	4.81088	24	1.47254	6.72e-05	6.72e-05	1.09082	0.000798488	1	0	0	1	1	0	0		179534	0
62	WBGene00000065	5.55667	5.69733	5.68433	5.68133	6.261	6.16967	6.168	6.11767	4	4	5.65492	6.17908	0.0658671	0.0597044	1.73247	1.82114	0.0117142	0.00963978	0.139229	0.162627	0.0246975	0.0259064	4.89682	24	1.36435	4.95415	24	1.10029	5.4e-05	4.67e-05	1.09269	0.000680845	1	0	0	1	1	0	0		179533	0
63	WBGene00000066	5.558	5.69	5.667	5.28	6.205	6.211	6.117	6.216	4	4	5.54875	6.18725	0.18819	0.0470487	1.71313	1.82247	0.0343674	0.00763253	0.165324	0.160498	0.0292598	0.0257731	5.54214	24	1.06104	5.60806	24	1.28887	1.06e-05	9e-06	1.11507	0.000214716	1	0	1	0	1	0	0		180767	0
64	WBGene00000067	5.19675	5.2315	5.52725	5.313	5.65675	5.77175	5.8955	5.921	4	4	5.31712	5.81125	0.148314	0.121893	1.67064	1.75963	0.0276307	0.0210534	0.175419	0.201148	0.0318991	0.0341768	3.70278	24	1.31485	3.80682	24	1.14791	0.00111253	0.000857247	1.09293	0.00569522	1	0	0	1	0	0	0		176793	0
65	WBGene00000068	2.66873	3.55733	2.86729	2.77621	3.34812	4.24098	3.97923	4.13456	4	4	2.96739	3.92572	0.401577	0.399789	1.08127	1.36342	0.128556	0.106611	0.372156	0.363484	0.117253	0.0913513	3.68439	24	1.04828	3.79644	24	1.64748	0.00116486	0.000879867	1.32295	0.0058654	1	0	1	0	0	0	0		175622	0
66	WBGene00000069	2.22344	2.75009	2.40656	2.27582	2.00565	2.52394	2.14459	2.16865	4	4	2.41398	2.21071	0.236936	0.220836	0.877807	0.78971	0.0951974	0.0970807	0.323271	0.307526	0.128214	0.134369	-0.911168	24	1.10502	-0.948686	24	1.09832	0.371269	0.352236	-1.09195	0.287192	0	0	0	0	0	0	0			0
67	WBGene00000070	2.3733	3.23264	2.6725	2.64702	3.29646	3.88264	3.71102	3.6271	4	4	2.73136	3.62931	0.360586	0.246067	0.998507	1.28728	0.128371	0.0690153	0.352006	0.332142	0.138255	0.0932007	3.71073	24	1.12319	3.4638	24	2.2005	0.00109065	0.00201477	1.32875	0.0056003	1	1	1	0	0	0	0		175489	0
68	WBGene00000071	3.2707	3.46489	3.55511	3.09726	3.79978	3.62089	3.59433	3.26581	4	4	3.34699	3.5702	0.20445	0.222492	1.20665	1.27113	0.0615744	0.0634039	0.316467	0.322727	0.0923641	0.0923285	0.987667	24	1.03995	0.98754	24	1.00077	0.333169	0.33323	1.06669	0.26921	0	0	0	0	0	0	0			0
69	WBGene00000072	2.4415	3.28975	3.13587	2.98075	2.32925	2.82512	2.68475	2.9085	4	4	2.96197	2.68691	0.369199	0.255689	1.07963	0.984831	0.13102	0.0985744	0.363501	0.307464	0.117212	0.107764	-1.15549	24	1.39773	-1.19074	24	1.18303	0.259263	0.245402	-1.10237	0.232332	0	0	0	0	0	0	0			0
70	WBGene00000073	3.55017	3.21892	3.4775	3.54533	3.22042	3.00508	3.21617	3.29517	4	4	3.44798	3.18421	0.15627	0.124806	1.237	1.15762	0.046275	0.0397982	0.306171	0.30643	0.0883836	0.102598	-1.21785	24	1.00169	-1.17238	24	1.34751	0.235119	0.252551	-1.08284	0.218635	0	0	0	0	0	0	0			0
71	WBGene00000074	3.73936	3.757	3.42414	3.53027	4.20282	3.88823	3.38614	3.54055	4	4	3.61269	3.75443	0.162498	0.365304	1.28369	1.31942	0.0451863	0.0966182	0.325687	0.363429	0.0848703	0.0913924	0.580885	24	1.2452	0.572948	24	1.1596	0.566733	0.572009	1.03923	0.366779	0	0	0	0	0	0	0			0
72	WBGene00000075	2.91144	2.51089	2.68878	2.94644	2.37778	2.24378	2.58422	2.81489	4	4	2.76439	2.50517	0.203919	0.249486	1.01474	0.914669	0.0747376	0.0989367	0.344402	0.31225	0.123258	0.132516	-1.11522	24	1.21654	-1.10593	24	1.15586	0.275798	0.279721	-1.10348	0.241368	0	0	0	0	0	0	0			0
73	WBGene00000079	4.8851	4.595	4.61986	4.79376	4.0701	4.0851	4.16662	4.48957	4	4	4.72343	4.20285	0.139408	0.195799	1.55221	1.43497	0.029451	0.0456999	0.17947	0.288137	0.0394071	0.0661734	-3.06714	24	2.57758	-3.04449	24	2.81979	0.00528788	0.00558193	-1.12386	0.0169573	0	0	0	0	0	0	0			0
74	WBGene00000080	4.98586	4.66871	4.80486	4.93557	3.981	3.67871	4.17171	4.34529	4	4	4.84875	4.04418	0.142216	0.285474	1.5784	1.39538	0.0294756	0.0714739	0.198395	0.317282	0.0397029	0.0771274	-4.30018	24	2.55757	-4.21959	24	3.77375	0.00024619	0.000302103	-1.19895	0.00198605	0	0	0	0	0	0	0			0
75	WBGene00000081	3.78944	4.241	4.40362	4.07038	3.83513	4.06575	4.30119	4.25038	4	4	4.12611	4.11311	0.262468	0.211135	1.41579	1.41317	0.0643217	0.0519735	0.313373	0.276809	0.0693013	0.066352	-0.0621828	24	1.28163	-0.0546218	24	1.09087	0.950932	0.956892	-1.00316	0.483304	0	0	0	0	0	0	0			0
76	WBGene00000082	2.17586	3.30691	2.54091	2.25452	2.24423	3.25936	2.56991	2.26952	4	4	2.56955	2.58576	0.515994	0.472809	0.929725	0.938333	0.189519	0.173372	0.393804	0.375316	0.142746	0.149209	0.059575	24	1.10095	0.0833767	24	1.0926	0.952987	0.934244	1.00631	0.483664	0	0	0	0	0	0	0			0
77	WBGene00000083	3.11908	3.54475	3.61279	3.38496	3.329	3.53904	3.61475	3.80246	4	4	3.4154	3.57131	0.219412	0.19585	1.22671	1.2718	0.0654353	0.055055	0.334129	0.318856	0.0912272	0.0937182	0.675174	24	1.09809	0.689548	24	1.05536	0.506018	0.497092	1.04565	0.343773	0	0	0	0	0	0	0			0
78	WBGene00000084	2.56492	2.98783	3.00304	2.80996	2.48821	2.62758	2.63867	2.5985	4	4	2.84144	2.58824	0.204126	0.0688049	1.04232	0.950709	0.0734267	0.0268877	0.325034	0.282212	0.125321	0.113683	-1.17642	24	1.32649	-1.08284	24	1.21521	0.250963	0.289641	-1.09783	0.227758	0	0	0	0	0	0	0			0
79	WBGene00000085	2.982	3.232	2.995	2.766	3.172	3.221	2.898	2.766	4	4	2.99375	3.01425	0.190414	0.218153	1.09501	1.10137	0.0635892	0.0728505	0.352102	0.342319	0.121064	0.118993	0.0834897	24	1.05797	0.0749194	24	1.03511	0.934155	0.9409	1.00685	0.47933	0	0	0	0	0	0	0			0
80	WBGene00000086	3.36021	3.78783	3.32975	2.98813	3.283	3.6609	3.15746	3.02413	4	4	3.36648	3.28137	0.327658	0.274209	1.21034	1.18571	0.0969439	0.0818528	0.35596	0.345092	0.109263	0.104217	-0.343337	24	1.06398	-0.326121	24	1.09918	0.734335	0.74716	-1.02594	0.422947	0	0	0	1	0	0	0			0
81	WBGene00000088	3.4385	3.843	3.929	3.5255	3.49675	3.72512	3.80375	3.64913	4	4	3.684	3.66869	0.238536	0.130859	1.30242	1.29935	0.0648357	0.0359249	0.308112	0.294462	0.0820576	0.0859352	-0.0718571	24	1.09486	-0.0517025	24	1.09674	0.943311	0.959194	-1.00417	0.481694	0	0	0	1	0	0	0			0
82	WBGene00000089	3.078	3.632	3.548	3.54	2.937	3.476	2.962	3.051	4	4	3.4495	3.1065	0.251138	0.251145	1.23614	1.13115	0.0754724	0.07821	0.317845	0.318488	0.096384	0.101683	-1.52459	24	1.00405	-1.49877	24	1.11299	0.140431	0.146974	-1.11041	0.157447	0	0	0	0	0	0	0			0
83	WBGene00000090	4.51832	4.10592	4.32128	4.4414	3.53924	3.48124	3.84442	4.0781	4	4	4.34673	3.73575	0.179854	0.278331	1.46877	1.31589	0.0418102	0.0739192	0.228979	0.331041	0.0544668	0.0885249	-3.0358	24	2.09013	-2.94181	24	2.6416	0.00569876	0.00712283	-1.16355	0.0178637	0	0	1	0	0	0	0			0
84	WBGene00000092	4.0458	3.9612	3.627	3.7572	4.138	3.8538	3.8572	3.704	4	4	3.8478	3.88825	0.190635	0.181176	1.34658	1.35716	0.0497262	0.0460908	0.277538	0.299965	0.0754348	0.0758793	0.197962	24	1.16814	0.197769	24	1.01182	0.844742	0.844891	1.01051	0.454468	0	1	0	0	0	0	0			0
85	WBGene00000093	4.624	4.633	4.551	4.713	4.246	3.769	4.178	4.501	4	4	4.63025	4.1735	0.066269	0.303399	1.53253	1.42673	0.0143059	0.0738945	0.178614	0.303112	0.0417168	0.0699265	-2.59647	24	2.87988	-2.59882	24	2.80972	0.0158302	0.0157464	-1.10944	0.0365828	0	0	0	1	0	0	0			0
86	WBGene00000094	4.88	4.482	4.707	4.886	4.118	3.807	4.153	4.341	4	4	4.73875	4.10475	0.19023	0.221339	1.55516	1.41104	0.0406026	0.054602	0.207145	0.283471	0.0425394	0.0731367	-3.6116	24	1.87271	-3.40684	24	2.95588	0.00139669	0.00231827	-1.15446	0.00669342	0	0	0	0	0	0	0			0
87	WBGene00000095	3.988	4.22033	3.903	4.00333	3.86367	3.86333	3.76433	3.81267	4	4	4.02867	3.826	0.135184	0.0475854	1.39302	1.34176	0.0331992	0.0124697	0.289366	0.277165	0.0638911	0.0693252	-1.01159	24	1.08998	-1.08739	24	1.17734	0.321827	0.287666	-1.05297	0.264313	0	0	0	0	0	0	0			0
88	WBGene00000096	2.674	2.89314	2.39643	2.33829	2.63829	2.64686	2.193	2.24529	4	4	2.57546	2.43086	0.257511	0.245422	0.942329	0.884401	0.0990098	0.101329	0.314213	0.300004	0.122842	0.123592	-0.665729	24	1.09697	-0.664858	24	1.01225	0.511933	0.51248	-1.05949	0.345959	0	0	0	0	0	0	0			0
89	WBGene00000097	4.654	4.694	4.816	4.866	4.269	3.791	3.824	4.241	4	4	4.7575	4.03125	0.0998983	0.258968	1.55956	1.39253	0.0209929	0.0643122	0.180478	0.310135	0.0376328	0.0751443	-4.04793	24	2.95294	-3.97498	24	3.98713	0.000466773	0.000561286	-1.18016	0.00312397	0	0	0	0	0	0	0			0
90	WBGene00000098	5.659	5.473	5.695	5.683	5.388	4.92	5.369	5.486	4	4	5.6275	5.29075	0.104082	0.252427	1.72754	1.66508	0.0186596	0.0487707	0.137785	0.265006	0.025283	0.0496248	-2.25488	24	3.69919	-2.24276	24	3.8525	0.033538	0.0344145	-1.06365	0.0612831	0	0	0	0	0	0	0			0
91	WBGene00000099	5.011	4.669	5.081	5.121	4.465	3.9	4.616	4.776	4	4	4.9705	4.43925	0.206077	0.381268	1.60286	1.48759	0.0422416	0.0887753	0.184906	0.312032	0.0395105	0.0772142	-2.92939	24	2.84772	-2.65784	24	3.81918	0.00733476	0.013772	-1.11967	0.0214297	0	0	0	0	0	0	0			0
92	WBGene00000100	4.04531	4.72421	4.16113	4.01161	4.17313	4.75336	4.27879	4.25034	4	4	4.23557	4.36391	0.332	0.263446	1.44131	1.47205	0.0758934	0.0588275	0.264241	0.304807	0.0654518	0.0664261	0.636294	24	1.33061	0.659217	24	1.02999	0.530607	0.516032	1.0303	0.353726	0	0	0	0	0	0	0			0
93	WBGene00000101	5.07382	4.79333	4.98078	4.9842	4.40484	4.29824	4.56509	4.77156	4	4	4.95803	4.50993	0.117948	0.206029	1.60079	1.50551	0.0239632	0.0454325	0.168189	0.260718	0.0366266	0.0601608	-2.88855	24	2.40297	-2.70581	24	2.69796	0.00807448	0.0123411	-1.09936	0.0228581	0	0	0	0	0	0	0			0
94	WBGene00000102	4.98189	4.78711	4.823	4.80644	5.27244	5.07656	5.00311	4.74267	4	4	4.84961	5.02369	0.0893964	0.219143	1.57877	1.61345	0.018281	0.0438704	0.191026	0.25501	0.0380235	0.0503226	1.09272	24	1.7821	1.0995	24	1.75154	0.285364	0.282457	1.0359	0.246269	0	0	0	0	0	0	0			0
95	WBGene00000103	3.8075	3.7465	3.6375	3.09333	4.12233	4.04417	3.98433	3.466	4	4	3.57121	3.90421	0.326251	0.297553	1.26959	1.35977	0.0954496	0.0790812	0.354188	0.318957	0.0970185	0.0835456	1.39729	24	1.23311	1.40872	24	1.34854	0.175112	0.171743	1.09325	0.181245	0	0	0	0	0	0	0			0
96	WBGene00000105	3.85507	4.17786	3.66014	3.78521	4.22042	4.59914	4.2416	4.37053	4	4	3.86957	4.35792	0.22078	0.173956	1.35195	1.47141	0.0561736	0.0394511	0.294389	0.279961	0.0696357	0.0638961	2.40418	24	1.10572	2.52803	24	1.18772	0.0242866	0.0184628	1.1262	0.0489282	0	0	1	0	0	0	0			0
97	WBGene00000106	4.45779	4.07468	3.82579	4.00806	4.43918	4.14197	4.00453	4.13982	4	4	4.09158	4.18138	0.265842	0.183499	1.40738	1.42993	0.0640115	0.0433371	0.330234	0.266824	0.0737027	0.0639551	0.423	24	1.53178	0.46218	24	1.32806	0.676061	0.648115	1.02195	0.404268	0	0	0	0	0	0	0			0
98	WBGene00000107	5.01957	5.15871	5.07171	4.98114	5.11786	5.254	5.065	4.66171	4	4	5.05779	5.02464	0.0768441	0.254715	1.62084	1.61337	0.0151505	0.0516751	0.164644	0.263216	0.034339	0.0522946	-0.213502	24	2.55584	-0.239025	24	2.3192	0.832739	0.813116	-1.0066	0.450865	0	0	0	1	0	0	0			0
99	WBGene00000108	2.6505	2.3083	2.1193	2.2716	2.349	2.3916	2.2167	2.016	4	4	2.33743	2.24333	0.224184	0.168857	0.845707	0.805772	0.093676	0.0769291	0.304403	0.276491	0.121582	0.111407	-0.457654	24	1.21209	-0.484347	24	1.19102	0.651318	0.63253	-1.04195	0.395896	0	0	0	0	0	0	0			0
100	WBGene00000109	4.48022	4.75638	4.54994	4.49712	4.19106	4.569	4.26078	4.33334	4	4	4.57091	4.33855	0.127156	0.164251	1.51943	1.46701	0.0275028	0.0374262	0.202542	0.272497	0.0464042	0.0669763	-1.36878	24	1.81006	-1.28661	24	2.08318	0.183746	0.210503	-1.05356	0.187236	0	0	0	0	0	0	0			0
101	WBGene00000110	4.24286	4.095	4.49329	4.44614	4.08029	4.45386	4.35157	4.49029	4	4	4.31932	4.344	0.184855	0.185356	1.46241	1.4681	0.0430424	0.0433749	0.241378	0.26485	0.0516965	0.0658186	0.137738	24	1.20394	0.136009	24	1.62097	0.891597	0.892949	1.00571	0.466841	0	0	0	0	0	0	0			0
102	WBGene00000111	2.71	2.71875	2.578	2.4685	2.38575	2.57425	2.4835	2.6035	4	4	2.61881	2.51175	0.119111	0.0983165	0.961936	0.920399	0.0458709	0.0394403	0.313148	0.288746	0.123922	0.115748	-0.502697	24	1.17617	-0.489907	24	1.14621	0.619759	0.628648	-1.04262	0.384877	0	0	0	0	0	0	0			0
103	WBGene00000112	3.69545	3.93009	3.97491	3.91273	4.86264	4.56755	4.39682	4.58691	4	4	3.8783	4.60348	0.124677	0.192732	1.355	1.52616	0.0326144	0.0415611	0.275619	0.256951	0.0688053	0.057172	3.84901	24	1.15058	3.82659	24	1.44836	0.00077101	0.000815701	1.18698	0.0044192	1	1	1	0	0	0	0		173510	0
104	WBGene00000113	3.18564	3.22886	3.222	3.13257	3.78979	3.85157	3.8175	3.61636	4	4	3.19227	3.7688	0.0440845	0.104725	1.16066	1.32646	0.0138622	0.0281194	0.328141	0.315179	0.0987224	0.0780003	2.53429	24	1.08394	2.63561	24	1.60191	0.0182062	0.0144867	1.1806	0.0402413	0	0	0	0	0	0	0			0
105	WBGene00000114	5.495	5.4678	5.4248	5.343	6.3338	6.1613	5.8503	5.8685	4	4	5.43265	6.05347	0.0663872	0.235021	1.69237	1.80007	0.012258	0.0386791	0.161027	0.206462	0.0292992	0.0339704	4.74215	24	1.64392	4.80156	24	1.34428	8e-05	6.88e-05	1.11428	0.000912348	1	1	1	1	0	0	0		174800	0
106	WBGene00000115	4.22036	3.82391	4.09945	4.26445	4.00373	3.52127	3.73182	4.10827	4	4	4.10205	3.84127	0.19811	0.26587	1.41059	1.34399	0.0491366	0.0698085	0.293704	0.326515	0.0681409	0.0775398	-1.18756	24	1.23591	-1.29045	24	1.29489	0.246628	0.209188	-1.06789	0.225288	0	0	0	0	0	0	0			0
107	WBGene00000116	3.51325	3.117	3.383	3.2325	3.971	3.22675	3.43375	3.57225	4	4	3.31144	3.55094	0.173096	0.313973	1.19636	1.26434	0.05227	0.0871684	0.333294	0.329599	0.0943289	0.0963588	1.02188	24	1.02255	1.00824	24	1.0435	0.317028	0.323397	1.07233	0.261803	0	0	0	0	0	0	0			0
108	WBGene00000117	3.91971	3.92695	3.84095	3.73876	3.188	3.2679	3.57038	3.44695	4	4	3.8566	3.36831	0.0876804	0.17283	1.34959	1.21343	0.0228738	0.051205	0.275706	0.300921	0.0673691	0.0864414	-2.39281	24	1.19128	-2.48487	24	1.64635	0.0248984	0.0203264	-1.14496	0.0496936	0	0	0	0	0	0	0			0
109	WBGene00000118	3.692	4.507	4.18156	4.36011	5.15489	5.35678	4.74933	4.90711	4	4	4.18517	5.04203	0.354687	0.268128	1.42875	1.61675	0.0872824	0.053118	0.31479	0.24296	0.0720861	0.0492582	4.30967	24	1.6787	4.30666	24	2.14164	0.000240321	0.000242165	1.20474	0.00195111	1	1	0	0	0	0	0		176056	0
110	WBGene00000120	4.127	3.94	3.908	4.011	3.748	3.335	3.582	3.906	4	4	3.9965	3.64275	0.0970653	0.244117	1.3852	1.29103	0.0241493	0.0676805	0.248442	0.328856	0.078855	0.0937092	-1.7166	24	1.75211	-1.53776	24	1.41223	0.098934	0.137187	-1.09711	0.126341	0	0	0	0	0	0	0			0
111	WBGene00000121	4.971	5.266	4.603	5.063	4.935	4.697	4.65	4.806	4	4	4.97575	4.772	0.277382	0.126799	1.60339	1.5625	0.0564954	0.0264569	0.207644	0.231188	0.0437283	0.0473781	-1.31135	24	1.23963	-1.26835	24	1.1739	0.202146	0.216838	-1.0427	0.198787	0	0	0	1	0	0	0			0
112	WBGene00000122	5.94	5.928	6.007	5.962	5.964	5.799	5.9	5.921	4	4	5.95925	5.896	0.0348078	0.0699381	1.78493	1.77422	0.00583147	0.0119028	0.104602	0.173032	0.0175069	0.0287585	-0.625643	24	2.73633	-0.636254	24	2.69845	0.537454	0.530633	-1.01073	0.356194	0	0	0	1	0	0	0			0
113	WBGene00000123	5.11224	4.82699	4.79595	4.88943	4.73503	4.51492	4.49799	4.68644	4	4	4.90615	4.6086	0.142788	0.119798	1.59018	1.52767	0.028782	0.0259787	0.18509	0.237122	0.0369523	0.0529816	-1.97837	24	1.64125	-1.93534	24	2.05574	0.0594749	0.0648165	-1.06457	0.0901274	0	0	0	0	0	0	0			0
114	WBGene00000133	1.5855	1.31817	1.404	1.28817	1.34667	1.09717	1.2185	1.37683	4	4	1.39896	1.25979	0.133698	0.12832	0.332422	0.226943	0.0930651	0.104066	0.210956	0.212176	0.152629	0.180649	-0.930255	24	1.0116	-0.892024	24	1.40087	0.361502	0.381237	-1.11047	0.282439	0	0	0	0	0	0	0			0
115	WBGene00000134	2.279	2.562	1.917	2.7595	1.731	1.5795	1.552	1.931	4	4	2.37938	1.69837	0.365929	0.173912	0.857584	0.525848	0.158787	0.100283	0.332395	0.236764	0.138841	0.144755	-3.33744	24	1.97095	-3.30783	24	1.08701	0.00274859	0.00295485	-1.40097	0.0107408	0	0	0	0	0	0	0			0
116	WBGene00000135	2.452	2.67021	2.30464	2.35121	2.22943	2.65314	2.14164	2.12386	4	4	2.44452	2.28702	0.162548	0.248408	0.89223	0.823074	0.0652788	0.10396	0.2665	0.306117	0.122515	0.145732	-0.776111	24	1.31941	-0.72647	24	1.41491	0.445265	0.474577	-1.06887	0.318901	0	0	0	0	0	0	0			0
117	WBGene00000136	3.09571	3.57029	3.99286	3.62543	2.84757	3.07643	3.93171	3.916	4	4	3.57107	3.44293	0.368249	0.56317	1.26879	1.2261	0.10493	0.165826	0.361268	0.410132	0.099924	0.127219	-0.46891	24	1.28881	-0.527793	24	1.62092	0.643365	0.602489	-1.03722	0.393249	0	0	0	0	0	0	0			0
118	WBGene00000137	3.04175	2.76218	2.72311	2.92071	2.56564	2.45554	2.55725	2.86654	4	4	2.86194	2.61124	0.147211	0.177401	1.05051	0.958148	0.0511656	0.0663736	0.349413	0.31048	0.117664	0.107075	-1.07267	24	1.26652	-1.16117	24	1.20758	0.294089	0.25699	-1.09601	0.250798	0	0	0	0	0	0	0			0
119	WBGene00000138	3.22586	3.8855	3.66457	3.39629	3.32443	3.715	3.43021	3.31814	4	4	3.54305	3.44695	0.291084	0.185951	1.26246	1.23643	0.0820782	0.0528766	0.322808	0.295567	0.0956243	0.096142	-0.439165	24	1.19282	-0.383997	24	1.01086	0.664471	0.704362	-1.02788	0.400551	0	0	0	0	0	0	0			0
120	WBGene00000139	2.3466	2.5502	2.8966	2.6434	2.4368	2.4604	2.6652	2.508	4	4	2.6092	2.5176	0.228187	0.102759	0.956186	0.922694	0.0872376	0.0402131	0.315898	0.295837	0.122511	0.119773	-0.423296	24	1.14022	-0.390963	24	1.04625	0.675849	0.699274	-1.03638	0.404209	0	0	0	0	0	0	0			0
121	WBGene00000140	4.2198	4.67893	4.63466	4.41044	5.73514	5.77248	5.68248	5.6745	4	4	4.48596	5.71615	0.212833	0.0461931	1.5001	1.74327	0.0478321	0.00807306	0.217279	0.19873	0.0494938	0.0348436	8.35572	24	1.19539	8.03496	24	2.01769	1.45e-08	2.92e-08	1.27423	1.82e-06	1	0	1	0	0	0	0	exclusively expressed in muscle	172034	0
122	WBGene00000142	5.508	5.266	5.232	5.227	4.448	3.704	4.212	4.671	4	4	5.30825	4.25875	0.134289	0.414608	1.66903	1.44529	0.0250028	0.099955	0.173212	0.326941	0.0312651	0.0775722	-5.67312	24	3.56274	-5.35013	24	6.15592	7.65e-06	1.72e-05	-1.24643	0.000168411	0	0	0	0	0	0	0	enriched in other tissue		0
123	WBGene00000143	4.31064	3.956	4.25327	4.40864	3.43909	3.14482	3.62045	3.97964	4	4	4.23214	3.546	0.194947	0.349266	1.44189	1.26219	0.0468403	0.0983902	0.241041	0.34122	0.0535906	0.0997973	-3.28476	24	2.00396	-3.17287	24	3.46785	0.00312599	0.0041011	-1.1935	0.0117419	0	0	0	0	0	0	0			0
124	WBGene00000144	4.77	4.704	4.854	5.15	4.006	3.379	4.193	4.541	4	4	4.8695	4.02975	0.196817	0.487192	1.58239	1.38798	0.039863	0.124857	0.203543	0.36867	0.042088	0.0929774	-3.98812	24	3.28067	-3.80964	24	4.8802	0.000542967	0.000851185	-1.20839	0.00350339	0	0	0	0	0	0	0			0
125	WBGene00000145	5.393	5.134	5.435	5.64	4.918	4.366	4.98	5.256	4	4	5.4005	4.88	0.207869	0.372834	1.68593	1.58289	0.0386659	0.0782045	0.190455	0.326589	0.0351942	0.0640892	-2.75349	24	2.94048	-2.81865	24	3.3161	0.0110583	0.00950778	-1.10666	0.0286031	0	0	0	0	0	0	0			0
126	WBGene00000146	5.12905	4.9245	5.0745	5.1305	4.85205	4.74823	4.74277	4.88555	4	4	5.06464	4.80715	0.0969915	0.0725207	1.62214	1.57002	0.0193019	0.015077	0.174725	0.223178	0.0347607	0.0467198	-1.81689	24	1.63152	-1.79022	24	1.80645	0.0817433	0.0860435	-1.05356	0.111648	0	0	0	1	0	0	0			0
127	WBGene00000147	5.242	4.775	5.123	5.265	3.547	3.015	3.553	4.011	4	4	5.10125	3.5315	0.226228	0.407183	1.62873	1.25663	0.0451774	0.11714	0.197585	0.344978	0.0401874	0.0992117	-7.89703	24	3.04843	-6.95234	24	6.0946	3.97e-08	3.45e-07	-1.4445	3.66e-06	0	0	0	0	0	0	0	enriched in other tissue		0
128	WBGene00000148	4.22061	3.99133	4.02789	4.03367	3.70333	3.39061	3.62417	3.67767	4	4	4.06837	3.59894	0.103207	0.142751	1.40301	1.28004	0.0250883	0.0403685	0.295793	0.315079	0.0682412	0.0826116	-2.17245	24	1.13465	-2.29523	24	1.46551	0.0399242	0.0307632	-1.13044	0.0692484	0	0	0	0	0	0	0			0
129	WBGene00000149	4.786	5.18514	4.958	4.72721	5.34079	5.64643	5.14036	5.14421	4	4	4.91409	5.31795	0.20553	0.238148	1.59146	1.67035	0.0414764	0.0442166	0.199129	0.271285	0.0400474	0.0485272	2.40017	24	1.85602	2.50771	24	1.46832	0.0245008	0.0193196	1.08218	0.0491331	0	0	1	0	0	0	0			0
130	WBGene00000150	4.197	4.583	4.513	4.078	3.53	3.628	3.828	3.651	4	4	4.34275	3.65925	0.243612	0.124133	1.46732	1.29683	0.0562567	0.0336831	0.23253	0.289707	0.0572398	0.0821099	-3.67984	24	1.55224	-3.40671	24	2.05776	0.00117819	0.00231902	-1.18679	0.00590807	0	0	0	0	0	0	0			0
131	WBGene00000151	4.87175	4.527	5.1065	5.0055	4.44625	4.214	4.83475	5.011	4	4	4.87769	4.6265	0.25279	0.362333	1.58364	1.52948	0.0527092	0.0787217	0.220018	0.292139	0.0461075	0.0641329	-1.37365	24	1.76304	-1.37128	24	1.93472	0.182246	0.182975	-1.05429	0.186259	0	0	0	0	0	0	0			0
132	WBGene00000155	4.65525	4.27625	4.63992	4.77267	3.83475	3.54967	4.03683	4.26267	4	4	4.58602	3.92098	0.214858	0.30303	1.52217	1.36408	0.0477516	0.0778908	0.231384	0.337982	0.0479435	0.0829648	-3.24729	24	2.13365	-3.29968	24	2.99453	0.00342445	0.00301424	-1.16961	0.0125846	0	0	0	0	0	1	0			0
133	WBGene00000156	5.14428	4.77018	5.02058	5.08406	4.21536	4.11582	4.34572	4.5809	4	4	5.00478	4.31445	0.16435	0.201036	1.60998	1.46117	0.0332515	0.0461949	0.193263	0.288215	0.0374642	0.0644376	-3.97866	24	2.224	-3.99308	24	2.95832	0.000556097	0.000536199	-1.16	0.00355391	0	0	0	0	0	0	0			0
134	WBGene00000157	4.182	4.623	4.139	4.131	3.972	4.084	3.912	4.166	4	4	4.26875	4.0335	0.237226	0.113506	1.4502	1.39434	0.0541632	0.0281112	0.261298	0.288273	0.058258	0.0720433	-1.20928	24	1.21713	-1.2059	24	1.52924	0.238332	0.239611	-1.05832	0.220513	0	0	0	0	0	0	0			0
135	WBGene00000158	4.76964	4.66988	4.6014	4.58728	4.05948	4.1896	4.17252	4.2516	4	4	4.65705	4.1683	0.0832784	0.0801086	1.53826	1.42737	0.0178003	0.0193066	0.190607	0.269074	0.0377367	0.0613567	-2.96441	24	1.99282	-3.079	24	2.64361	0.00675228	0.0051399	-1.11725	0.0201969	0	0	1	0	0	0	0			0
136	WBGene00000159	5.814	5.584	5.615	5.779	5.399	4.648	5.152	5.326	4	4	5.698	5.13125	0.115329	0.338417	1.73996	1.63366	0.0202408	0.0677332	0.149289	0.282398	0.0254411	0.056041	-3.54851	24	3.57821	-3.45444	24	4.85224	0.00163378	0.00206183	-1.11045	0.00745662	0	0	0	0	0	0	0			0
137	WBGene00000160	4.58397	4.43194	4.36175	4.46175	3.983	4.07214	4.04558	4.13794	4	4	4.45985	4.05967	0.0927582	0.0641849	1.49495	1.40101	0.0207181	0.0158081	0.186549	0.268239	0.0421233	0.0603607	-2.44965	24	2.06757	-2.55273	24	2.05336	0.0219751	0.017469	-1.09858	0.0457094	0	0	0	1	0	0	0			0
138	WBGene00000161	3.88291	4.00318	3.64821	3.77668	4.04047	4.04176	3.78097	3.91276	4	4	3.82774	3.94399	0.151285	0.12439	1.34169	1.37182	0.0395803	0.0317714	0.280185	0.288531	0.0722964	0.0698947	0.578091	24	1.06046	0.599223	24	1.06991	0.568588	0.554639	1.03037	0.367561	0	0	0	0	0	0	0			0
139	WBGene00000162	4.62511	4.44846	4.54359	4.49389	3.9703	4.1767	4.29193	4.44915	4	4	4.52776	4.22202	0.0756382	0.201571	1.51012	1.43945	0.016666	0.0479851	0.175276	0.271978	0.0474858	0.0673687	-1.88982	24	2.4078	-1.71482	24	2.01274	0.0709198	0.099265	-1.07242	0.101787	0	0	0	0	0	0	0			0
140	WBGene00000163	4.91868	4.69952	4.69571	4.76381	3.92794	3.94023	4.12023	4.2239	4	4	4.76943	4.05307	0.10429	0.143859	1.56205	1.399	0.0216905	0.0353762	0.18101	0.289677	0.0388377	0.0642874	-4.19435	24	2.56109	-4.34158	24	2.73995	0.000322087	0.000221602	-1.17674	0.00241425	0	0	0	0	0	0	0			0
141	WBGene00000164	3.916	3.966	3.728	3.862	3.329	3.118	3.233	3.426	4	4	3.868	3.2765	0.102541	0.131809	1.35247	1.18617	0.0267041	0.0403284	0.273697	0.331899	0.0656235	0.0936779	-2.74992	24	1.47052	-2.90802	24	2.03777	0.0111499	0.00771335	-1.18053	0.0287217	0	0	0	0	0	0	0			0
142	WBGene00000165	4.644	4.446	5.01	5.265	4.123	3.981	4.714	4.901	4	4	4.84125	4.42975	0.366593	0.446597	1.57502	1.48452	0.0756747	0.100976	0.258191	0.339561	0.0532616	0.0797691	-1.92933	24	1.72963	-1.88711	24	2.24307	0.0655948	0.0712994	-1.09289	0.0965789	0	0	0	0	0	0	0			0
143	WBGene00000166	1.94525	2.716	2.2375	2.11175	1.875	2.41675	1.71325	2.01725	4	4	2.25263	2.00556	0.331296	0.300946	0.804357	0.68779	0.142	0.145944	0.312535	0.29755	0.153146	0.157312	-1.14507	24	1.10325	-1.06189	24	1.05514	0.263473	0.298856	-1.12319	0.234873	0	0	0	0	0	0	0			0
144	WBGene00000168	4.19171	3.78929	4.47929	4.52514	3.53671	3.11186	4.01186	4.19171	4	4	4.24636	3.71304	0.338564	0.486803	1.4436	1.3052	0.0816665	0.134268	0.293795	0.420741	0.0607353	0.107557	-2.07856	24	2.05089	-2.241	24	3.13614	0.0485182	0.0345438	-1.14363	0.0789088	0	0	0	0	0	0	0			0
145	WBGene00000169	3.449	3.718	4.976	4.381	3.144	2.798	4.075	3.646	4	4	4.131	3.41575	0.686104	0.560681	1.40829	1.21823	0.164643	0.164979	0.443268	0.42797	0.103823	0.126642	-2.32166	24	1.07277	-2.32129	24	1.48788	0.0290611	0.0290847	-1.2094	0.0556182	0	0	0	0	0	0	0			0
146	WBGene00000170	5.312	5.893	4.896	5.083	6.199	5.994	5.91	5.431	4	4	5.296	5.8835	0.432833	0.325171	1.66451	1.77098	0.0800979	0.0562557	0.275961	0.239353	0.0503302	0.0408029	3.21653	24	1.32929	3.28638	24	1.52151	0.00368994	0.00311366	1.11093	0.0132877	0	0	1	0	0	0	0			0
147	WBGene00000171	2.4175	2.2685	1.7515	2.046	2.061	2.0275	1.7785	1.626	4	4	2.12087	1.87325	0.289726	0.207488	0.744553	0.622972	0.140667	0.112587	0.288707	0.258306	0.137422	0.136647	-1.27841	24	1.24924	-1.25472	24	1.01138	0.213329	0.221661	-1.13219	0.205566	0	0	0	0	0	0	0			0
148	WBGene00000172	2.671	3.986	3.96	3.579	2.999	2.879	3.371	3.236	4	4	3.549	3.12125	0.614186	0.222989	1.25414	1.13632	0.187716	0.071502	0.427067	0.306691	0.121805	0.10736	-1.6271	24	1.93905	-1.45135	24	1.28718	0.116775	0.159629	-1.13704	0.140475	0	0	1	0	0	0	0			0
149	WBGene00000173	1.697	1.644	1.865	1.335	1.247	2.196	1.437	1.426	4	4	1.63525	1.5765	0.221227	0.422083	0.484547	0.431202	0.140984	0.245741	0.231093	0.303238	0.153379	0.183856	-0.30819	24	1.72185	-0.44559	24	1.43689	0.760596	0.659887	-1.03727	0.431092	0	0	0	0	0	0	0			0
150	WBGene00000174	1.421	2.362	1.619	1.801	1.773	1.566	1.097	1.071	4	4	1.80075	1.37675	0.40507	0.348603	0.570255	0.295592	0.215818	0.253578	0.309104	0.268025	0.164472	0.204751	-2.07272	24	1.33002	-2.09164	24	1.54977	0.0491036	0.0472291	-1.30797	0.0795106	0	0	0	0	0	0	0			0
151	WBGene00000175	5.282	5.407	5.544	5.039	5.942	5.782	6.132	5.666	4	4	5.318	5.8805	0.21458	0.202276	1.67048	1.7712	0.0406461	0.03429	0.191292	0.203307	0.0352928	0.0339658	4.03004	24	1.12957	4.11248	24	1.07966	0.000488374	0.000396401	1.10577	0.00323199	1	1	1	0	0	0	0		180589	0
152	WBGene00000176	4.71	5.604	5.17	5.063	4.577	4.692	4.444	4.746	4	4	5.13675	4.61475	0.368322	0.133884	1.6345	1.52894	0.071503	0.0291585	0.24473	0.2442	0.0485947	0.0536391	-3.01973	24	1.00435	-2.91691	24	1.21838	0.00592121	0.00755366	-1.11312	0.0184061	0	0	0	0	0	0	0			0
153	WBGene00000177	3.078	3.262	3.946	3.67	4.392	4.193	4.596	4.701	4	4	3.489	4.4705	0.392454	0.225129	1.24488	1.49654	0.112329	0.0506984	0.376883	0.297849	0.103602	0.0569631	4.08644	24	1.60111	4.25717	24	3.30789	0.000423421	0.000274608	1.28131	0.0029133	1	0	0	0	0	0	0		3565336	0
154	WBGene00000179	4.238	4.522	4.872	4.727	4.974	4.822	5.398	5.236	4	4	4.58975	5.1075	0.274967	0.258351	1.52246	1.62975	0.0605558	0.0506098	0.239938	0.276567	0.0507466	0.0512445	2.82814	24	1.32862	2.97533	24	1.01972	0.00929994	0.00657984	1.11281	0.0252973	0	1	1	1	0	0	0			0
155	WBGene00000180	2.91892	3.11483	2.89067	2.88333	3.22083	3.20817	3.26533	3.13433	4	4	2.95194	3.20717	0.109675	0.0543931	1.08196	1.16528	0.0365312	0.0170184	0.315043	0.338481	0.101046	0.0955236	1.10391	24	1.15433	1.19847	24	1.11896	0.280577	0.242435	1.08646	0.243896	0	0	0	0	0	0	0			0
156	WBGene00000181	5.669	5.736	5.743	5.726	6.199	5.321	5.354	5.666	4	4	5.7185	5.635	0.0337293	0.406864	1.74369	1.72709	0.00591363	0.0707556	0.130115	0.296205	0.0220858	0.0517136	-0.516192	24	5.18237	-0.590382	24	5.48258	0.610444	0.560453	-1.01482	0.382098	0	0	0	1	0	0	0			0
157	WBGene00000182	5.503	5.604	5.601	5.352	6.015	5.43	5.753	5.556	4	4	5.515	5.6885	0.118364	0.255043	1.7073	1.7377	0.0216057	0.0445646	0.156872	0.254253	0.0285774	0.0438794	1.1615	24	2.62688	1.16114	24	2.35762	0.256862	0.257004	1.03146	0.231193	0	0	0	0	0	0	0			0
158	WBGene00000183	5.649	5.549	5.293	5.414	5.825	5.544	5.33	5.501	4	4	5.47625	5.55	0.155554	0.205314	1.70012	1.71329	0.0284459	0.0367582	0.172763	0.221338	0.0320744	0.0389966	0.525321	24	1.64139	0.521728	24	1.47821	0.60418	0.606642	1.01347	0.379937	0	0	0	1	0	0	0			0
159	WBGene00000184	5.488	5.215	5.189	5.232	5.125	4.909	4.749	4.776	4	4	5.281	4.88975	0.139128	0.171719	1.66386	1.58668	0.0260253	0.0347835	0.176167	0.279269	0.0333729	0.0567452	-2.36984	24	2.51301	-2.34462	24	2.89116	0.0261782	0.0276529	-1.08001	0.0514159	0	0	0	0	0	0	0			0
160	WBGene00000185	1.501	1.821	1.056	1.287	1.124	1.506	1.122	1.036	4	4	1.41625	1.197	0.325316	0.210044	0.32808	0.169208	0.231151	0.164617	0.265818	0.218116	0.18834	0.196403	-1.27526	24	1.48523	-1.16769	24	1.08745	0.214424	0.254403	-1.18317	0.20613	0	0	0	0	0	0	0			0
161	WBGene00000186	4.60211	4.50959	4.436	4.56281	4.26219	4.64265	4.34581	4.48614	4	4	4.52763	4.4342	0.0718935	0.166882	1.5101	1.48882	0.0159168	0.0374856	0.175091	0.26977	0.0473697	0.0626571	-0.581031	24	2.37389	-0.541973	24	1.7496	0.566637	0.592834	-1.02107	0.366747	0	1	1	0	0	0	0			0
162	WBGene00000187	4.921	4.517	4.669	4.65	4	3.748	3.853	3.941	4	4	4.68925	3.8855	0.16865	0.109777	1.54479	1.35695	0.0356654	0.0283604	0.202086	0.287213	0.0407427	0.0730286	-4.57737	24	2.01992	-4.49249	24	3.21283	0.000121642	0.000150967	-1.20686	0.00121753	0	0	0	0	0	0	0			0
163	WBGene00000188	2.922	3.895	2.915	2.819	4.146	3.965	3.39	3.286	4	4	3.13775	3.69675	0.507016	0.422924	1.13455	1.30254	0.150985	0.114515	0.398969	0.361386	0.132087	0.0985896	2.07688	24	1.21881	2.03835	24	1.79498	0.0486863	0.0526794	1.17815	0.079089	0	0	1	0	0	0	0			0
164	WBGene00000189	4.494	4.406	4.414	4.568	4.034	3.65	4.242	4.401	4	4	4.4705	4.08175	0.0761818	0.324699	1.49739	1.40409	0.0169893	0.0811738	0.17857	0.305449	0.0429611	0.0727873	-2.19747	24	2.92591	-2.20785	24	2.87052	0.0378786	0.0370578	-1.09524	0.066788	0	0	0	1	0	0	0			0
165	WBGene00000190	3.891	3.161	3.889	3.257	3.575	2.505	3.272	2.771	4	4	3.5495	3.03075	0.395125	0.482456	1.26213	1.09922	0.111845	0.160313	0.358321	0.390234	0.101321	0.135789	-1.95833	24	1.18606	-1.92313	24	1.79611	0.0619127	0.0664066	-1.17116	0.0926906	0	0	1	0	0	0	0			0
166	WBGene00000192	5.849	5.873	5.577	5.582	5.964	5.441	5.389	5.341	4	4	5.72025	5.53375	0.162832	0.289726	1.74371	1.70987	0.0284681	0.0511454	0.149907	0.253409	0.0260754	0.0452081	-1.26686	24	2.8576	-1.2968	24	3.00589	0.217362	0.20703	-1.0337	0.207955	0	0	0	0	0	0	0			0
167	WBGene00000193	1.807	1.821	1.595	1.911	1.51	1.859	1.54	1.726	4	4	1.7835	1.65875	0.133849	0.164165	0.576389	0.502434	0.0770945	0.0980853	0.219839	0.229137	0.136547	0.144574	-0.785724	24	1.08638	-0.743768	24	1.12103	0.439718	0.464237	-1.07521	0.316802	0	0	0	0	0	0	0			0
168	WBGene00000195	4.122	4.046	3.837	4.006	3.838	4.209	3.73	4.021	4	4	4.00275	3.9495	0.120519	0.210606	1.38664	1.37253	0.0303646	0.0530933	0.247547	0.301971	0.0750966	0.0715352	-0.272749	24	1.48804	-0.272072	24	1.10205	0.78738	0.787893	-1.01348	0.438509	0	0	0	0	0	0	0			0
169	WBGene00000196	4.18529	3.90875	4.13713	4.1475	3.44125	3.65037	3.95321	3.92475	4	4	4.09467	3.7424	0.125661	0.242797	1.40933	1.31812	0.031138	0.06561	0.287215	0.338724	0.0656125	0.0846063	-1.58644	24	1.39083	-1.70364	24	1.66277	0.125728	0.101364	-1.09413	0.146906	0	0	0	0	0	0	0			0
170	WBGene00000197	4.78845	4.52527	4.26832	4.5054	4.54345	4.39513	4.16043	4.32338	4	4	4.52186	4.35559	0.212629	0.159145	1.5081	1.47096	0.0469824	0.0366078	0.209929	0.267347	0.0500123	0.0640964	-0.978286	24	1.62184	-0.913581	24	1.64253	0.337692	0.370024	-1.03817	0.271447	0	0	0	0	0	0	0			0
171	WBGene00000198	5.468	5.104	5.634	5.553	5.187	4.648	5.413	5.516	4	4	5.43975	5.191	0.233869	0.387201	1.69302	1.64476	0.0437388	0.076662	0.201406	0.294355	0.0359623	0.0584202	-1.39487	24	2.13599	-1.40701	24	2.63896	0.175831	0.172244	-1.04792	0.181723	0	0	0	0	0	0	0			0
172	WBGene00000199	5.395	5.31875	5.2	5.32275	5.444	5.17075	4.90025	5.03225	4	4	5.30912	5.13681	0.0807487	0.232674	1.66934	1.63567	0.01526	0.0449452	0.165039	0.251131	0.0301697	0.0494415	-1.14681	24	2.3154	-1.1626	24	2.6856	0.262765	0.256422	-1.03354	0.234397	0	0	0	0	0	0	0			0
173	WBGene00000200	5.478	5.286	5.558	5.371	5.08	4.589	4.857	5.196	4	4	5.42325	4.9305	0.119335	0.267622	1.69051	1.59432	0.0220146	0.0548204	0.166776	0.307909	0.0302791	0.0590529	-2.81431	24	3.4086	-2.89898	24	3.8036	0.00960433	0.00787904	-1.09994	0.025922	0	0	0	0	0	0	0			0
174	WBGene00000201	5.634	6.156	5.988	5.957	6.267	6	6.087	5.856	4	4	5.93375	6.0525	0.21812	0.171823	1.78014	1.80017	0.0371313	0.0283433	0.148353	0.191541	0.0251	0.0313502	0.980296	24	1.667	0.997354	24	1.56004	0.33672	0.328543	1.02001	0.271055	0	0	0	0	0	0	0			0
175	WBGene00000202	4.308	4.006	4.489	4.443	3.502	3.335	4.011	3.981	4	4	4.3115	3.70725	0.21767	0.340539	1.46031	1.3071	0.0514078	0.0925161	0.25383	0.383413	0.0530545	0.0976307	-2.6282	24	2.28165	-2.75771	24	3.38632	0.0147326	0.0109511	-1.16299	0.0348094	0	0	0	0	0	0	0			0
176	WBGene00000203	4.223	3.546	3.548	3.636	3.883	2.706	3.139	3.391	4	4	3.73825	3.27975	0.32588	0.491693	1.31591	1.17928	0.083909	0.150812	0.319769	0.408327	0.0825873	0.119889	-1.7681	24	1.63058	-1.87704	24	2.10734	0.0897562	0.0727219	-1.1398	0.118362	0	0	0	1	0	0	0			0
177	WBGene00000204	4.403	4.36	4.901	4.876	4.286	4.214	4.547	4.566	4	4	4.635	4.40325	0.29342	0.17955	1.53213	1.48172	0.0633829	0.0408495	0.225105	0.272071	0.0524587	0.0617796	-1.31258	24	1.4608	-1.24404	24	1.38693	0.201739	0.2255	-1.05263	0.198486	0	0	0	0	0	0	0			0
178	WBGene00000205	5.051	4.861	4.423	4.727	4.733	4.079	4.124	4.181	4	4	4.7655	4.27925	0.264209	0.305366	1.56023	1.45195	0.0559827	0.0691508	0.214179	0.297078	0.0447596	0.0685385	-2.6554	24	1.92392	-2.64572	24	2.34475	0.013849	0.0141574	-1.11363	0.0331609	0	0	0	0	0	0	0			0
179	WBGene00000206	5.849	5.68	5.568	5.717	5.31	4.827	4.892	5.201	4	4	5.7035	5.0575	0.115852	0.234428	1.74093	1.62007	0.0202915	0.0463204	0.144772	0.245798	0.0254182	0.0503801	-4.52914	24	2.88261	-4.28355	24	3.92851	0.000137526	0.000256816	-1.12773	0.00133018	0	0	0	0	0	0	0			0
180	WBGene00000207	5.131	5.397	5.35	5.323	5.925	5.896	5.699	5.851	4	4	5.30025	5.84275	0.116903	0.100553	1.66757	1.76509	0.0222556	0.0173226	0.174339	0.192089	0.0313571	0.0324525	4.18261	24	1.214	4.32204	24	1.07108	0.000331826	0.000232882	1.10235	0.00246157	1	1	0	1	0	0	0		180718	0
181	WBGene00000208	4.34483	4.2335	4.17883	4.17533	3.91083	4.187	4.113	4.13433	4	4	4.23313	4.08629	0.0790914	0.121036	1.44281	1.4073	0.0185649	0.0299859	0.222137	0.274455	0.0462146	0.0748417	-0.831711	24	1.52651	-0.807344	24	2.62258	0.413771	0.427397	-1.03593	0.305638	0	0	0	0	0	0	0			0
182	WBGene00000209	5.824	5.589	5.889	5.784	6.267	5.62	5.709	5.826	4	4	5.7715	5.8555	0.129132	0.28701	1.75274	1.7665	0.0225475	0.0481737	0.141104	0.228738	0.0245215	0.0390939	0.625096	24	2.62784	0.596284	24	2.54168	0.537807	0.556569	1.01455	0.356287	0	1	0	1	0	0	0			0
183	WBGene00000210	5.342	5.569	5.691	5.875	6.255	6.217	5.832	5.901	4	4	5.61925	6.05125	0.223569	0.215741	1.7256	1.79979	0.0399223	0.0356845	0.169504	0.204015	0.0299544	0.0335971	3.2574	24	1.44865	3.2963	24	1.258	0.00334129	0.00303922	1.07688	0.012375	0	1	0	1	0	0	0			0
184	WBGene00000211	4.3088	4.0888	4.0978	3.762	5.837	5.228	4.977	4.999	4	4	4.06435	5.26025	0.225749	0.4009	1.40108	1.65808	0.0562275	0.0741684	0.291611	0.292833	0.0679626	0.0559248	5.78756	24	1.0084	5.83996	24	1.47683	5.76e-06	5.06e-06	1.29424	0.000136309	1	1	0	0	0	0	0		174131	0
185	WBGene00000212	2.71936	3.53609	3.62018	3.053	2.30673	3.04473	3.34027	2.94964	4	4	3.23216	2.91034	0.423475	0.435429	1.16652	1.05924	0.133977	0.158013	0.380181	0.395762	0.118854	0.130983	-1.17284	24	1.08365	-1.21302	24	1.2145	0.252371	0.236926	-1.11058	0.228417	0	0	0	0	0	0	0			0
186	WBGene00000213	1.88833	3.0355	1.98567	2.00567	1.75717	2.58817	1.8805	2.10767	4	4	2.22879	2.08338	0.540242	0.366504	0.782	0.722943	0.2205	0.169521	0.391666	0.310566	0.167896	0.146583	-0.581838	24	1.59046	-0.52995	24	1.31194	0.566102	0.601015	-1.0698	0.366593	0	0	1	0	0	0	0			0
187	WBGene00000214	5.41843	5.80686	5.72971	5.56243	5.70871	6.06157	5.968	5.73671	4	4	5.62936	5.86875	0.173732	0.173278	1.72764	1.76932	0.0309675	0.0294849	0.156606	0.194681	0.0280952	0.0333488	1.91627	24	1.54537	1.91161	24	1.40895	0.0673144	0.0679378	1.04253	0.0982622	0	0	1	0	0	1	0			0
188	WBGene00000215	3.591	3.46114	3.61157	3.66307	3.34557	3.46821	3.66457	3.62314	4	4	3.5817	3.52537	0.0858955	0.146664	1.27562	1.25933	0.0241692	0.0418483	0.281578	0.30423	0.0869932	0.0874091	-0.271731	24	1.16736	-0.264122	24	1.00958	0.788153	0.79394	-1.01598	0.438721	0	0	0	0	0	0	0			0
189	WBGene00000216	5.468	5.7145	5.8785	5.42375	5.57425	5.7145	5.866	5.6735	4	4	5.62119	5.70706	0.213982	0.121219	1.726	1.74154	0.0379258	0.0211765	0.165308	0.208562	0.0297238	0.0364695	0.645363	24	1.59178	0.660334	24	1.5054	0.524815	0.515328	1.01528	0.351336	0	0	1	1	0	0	0			0
190	WBGene00000217	4.6604	4.5858	4.6508	4.7614	5.668	5.3778	5.0236	5.317	4	4	4.6646	5.3466	0.0725437	0.264245	1.53991	1.67554	0.0155103	0.0495043	0.190996	0.270108	0.0369211	0.0507395	4.12317	24	1.99998	4.32285	24	1.88861	0.000385806	0.000232406	1.14621	0.00273301	1	1	0	0	0	0	0		181444	0
191	WBGene00000218	5.37625	5.736	5.90425	5.59175	5.79275	5.785	6.00625	5.8335	4	4	5.65206	5.85438	0.223871	0.103461	1.73143	1.76707	0.0397469	0.0175379	0.174488	0.184438	0.0308449	0.031492	1.59366	24	1.1173	1.61719	24	1.0424	0.124098	0.118907	1.03579	0.145649	0	0	1	1	0	0	0			0
192	WBGene00000219	5.9575	6.1205	5.9695	5.94375	6.16575	6.10125	6.1835	6.1585	4	4	5.99781	6.15225	0.0824655	0.035585	1.79132	1.81681	0.0136608	0.00579648	0.111316	0.162548	0.0183439	0.0263619	1.56781	24	2.13232	1.58679	24	2.06524	0.130017	0.12565	1.02575	0.150024	0	0	0	1	0	0	0			0
193	WBGene00000220	3.248	4.689	2.91	3.314	4.532	4.334	3.489	3.466	4	4	3.54025	3.95525	0.786011	0.557628	1.24739	1.36757	0.206609	0.141227	0.487663	0.390305	0.131897	0.100726	1.3288	24	1.5611	1.44825	24	1.7147	0.196409	0.160486	1.11722	0.195382	0	0	1	0	0	0	0			0
194	WBGene00000221	3.429	4.446	4.428	4.54	4.269	4.589	4.488	4.776	4	4	4.21075	4.5305	0.523475	0.211251	1.43129	1.51001	0.13313	0.046798	0.359527	0.282561	0.0916891	0.0650503	1.3985	24	1.61897	1.40056	24	1.98672	0.174752	0.174143	1.07594	0.181093	0	1	1	1	0	0	0			0
195	WBGene00000222	3.32718	3.53082	3.05173	3.17318	3.07727	3.41964	3.092	3.19555	4	4	3.27073	3.19611	0.20681	0.158035	1.18352	1.16104	0.0628723	0.0486448	0.337237	0.324443	0.101215	0.0969394	-0.318885	24	1.08042	-0.320886	24	1.09017	0.752572	0.751074	-1.02335	0.428762	0	0	0	0	0	0	0			0
196	WBGene00000223	4.60712	4.603	4.83212	4.78587	4.415	4.50113	4.64313	4.73975	4	4	4.70703	4.57475	0.11926	0.144731	1.54882	1.52018	0.0253206	0.0316313	0.17837	0.272483	0.0372807	0.0562457	-0.812355	24	2.33366	-0.848857	24	2.2762	0.424573	0.404349	-1.02892	0.310358	0	0	0	0	0	0	0			0
197	WBGene00000224	3.6306	4.2321	3.7641	3.678	4.5386	4.8425	4.4517	4.461	4	4	3.8262	4.57345	0.276185	0.183549	1.33999	1.51968	0.0700799	0.0394653	0.304644	0.278636	0.0760369	0.0581331	3.61995	24	1.1954	3.75462	24	1.71081	0.00136797	0.000977171	1.1953	0.0065998	1	0	1	0	0	0	0		178504	0
198	WBGene00000225	3.55807	3.96086	3.73079	3.56379	4.34007	4.42393	4.25921	4.04029	4	4	3.70337	4.26588	0.189426	0.164743	1.30828	1.45008	0.0504873	0.039047	0.29573	0.269993	0.0886124	0.0652093	2.80941	24	1.19974	2.5777	24	1.84659	0.00971447	0.016515	1.15189	0.0261281	0	0	0	1	0	0	0			0
199	WBGene00000226	4.6963	4.10788	4.46502	4.46786	3.94093	3.72746	3.92989	4.05784	4	4	4.43427	3.91403	0.243082	0.137193	1.48822	1.3641	0.0555013	0.0353548	0.219377	0.296669	0.045951	0.075386	-2.81995	24	1.82878	-2.81165	24	2.69148	0.00947906	0.00966396	-1.13292	0.0256942	0	0	0	0	0	0	0			0
200	WBGene00000227	4.44494	4.34588	4.25747	4.27641	3.22165	3.48235	3.60353	3.87071	4	4	4.33118	3.54456	0.084834	0.269562	1.4657	1.26324	0.019495	0.0762433	0.22201	0.325901	0.0476485	0.0974211	-3.98959	24	2.15489	-3.7337	24	4.18031	0.000540945	0.00102974	-1.22192	0.00349483	0	0	0	0	0	0	0			0
201	WBGene00000228	3.83721	4.07635	4.13865	3.84482	5.86735	5.66032	5.74788	5.51571	4	4	3.97426	5.69782	0.155974	0.148121	1.37926	1.73983	0.0392116	0.0260431	0.281936	0.225792	0.0791295	0.0386775	9.54335	24	1.55913	8.18763	24	4.18562	1.21e-09	2.09e-08	1.43368	3.82e-07	1	0	0	0	1	0	0	exclusively expressed in muscle	179709	0
202	WBGene00000229	5.69391	5.69064	5.58809	5.61073	6.19182	6.185	5.95864	5.91827	4	4	5.64584	6.06343	0.0544218	0.145276	1.73088	1.80206	0.0096429	0.0239723	0.133628	0.185408	0.0239247	0.0304132	3.65435	24	1.92512	3.67877	24	1.61597	0.00125556	0.00118133	1.07396	0.00619415	1	0	0	1	0	0	0		175716	0
203	WBGene00000230	5.96	6.095	5.889	6.111	6.507	6.293	5.925	6.051	4	4	6.01375	6.194	0.107255	0.258573	1.79393	1.82293	0.0178644	0.0416211	0.116131	0.205296	0.0192954	0.032913	1.52841	24	3.12509	1.5203	24	2.90956	0.139485	0.141502	1.02997	0.15684	0	0	0	1	0	0	0			0
204	WBGene00000231	5.02605	4.80847	4.81153	4.90984	4.95155	4.79742	4.75224	4.88442	4	4	4.88897	4.84641	0.102802	0.08901	1.58682	1.57811	0.0209231	0.0183476	0.186938	0.249031	0.0382334	0.056901	-0.273394	24	1.77465	-0.254	24	2.2149	0.786889	0.801659	-1.00878	0.438462	0	0	0	1	0	0	0			0
205	WBGene00000232	3.555	4.249	3.827	3.406	4.101	4.442	4.744	4.501	4	4	3.75925	4.447	0.370112	0.26512	1.32066	1.49088	0.0968241	0.0602224	0.353466	0.275992	0.0880927	0.0622108	3.06721	24	1.64023	3.15665	24	2.00516	0.00528692	0.00426482	1.18295	0.0169573	0	0	1	0	0	0	0			0
206	WBGene00000233	2.79767	3.50617	3.00039	2.736	2.63289	3.13589	2.57478	2.626	4	4	3.01006	2.74239	0.349493	0.263611	1.09714	1.00555	0.112042	0.0921121	0.404422	0.313608	0.127194	0.11394	-1.04604	24	1.66301	-1.07261	24	1.24618	0.305962	0.294112	-1.0976	0.256794	0	0	0	0	0	0	0			0
207	WBGene00000235	5.935	5.65	5.568	5.726	5.769	4.844	5.344	5.326	4	4	5.71975	5.32075	0.157337	0.378059	1.74364	1.6697	0.02732	0.071554	0.149191	0.309961	0.0260621	0.0565624	-2.31979	24	4.31647	-2.37453	24	4.71019	0.0291788	0.0259124	-1.07499	0.0558116	0	0	0	0	0	0	0			0
208	WBGene00000236	4.895	4.633	4.811	4.746	4.274	3.406	4.222	4.281	4	4	4.77125	4.04575	0.110521	0.427311	1.56241	1.39315	0.0232169	0.11191	0.193293	0.34984	0.0385819	0.0895554	-3.63034	24	3.27571	-3.47156	24	5.38784	0.00133303	0.00197654	-1.17932	0.00646718	0	0	0	0	0	0	0			0
209	WBGene00000237	2.70957	3.40709	2.82991	2.78074	2.47397	3.01763	2.62897	2.609	4	4	2.93183	2.68239	0.320666	0.233854	1.0714	0.983964	0.104505	0.0847631	0.363746	0.327195	0.125753	0.112572	-1.01966	24	1.2359	-1.03614	24	1.24788	0.318058	0.310466	-1.09299	0.262279	0	0	0	0	0	0	0			0
210	WBGene00000238	3.064	3.40813	3.3136	3.0128	3.90313	3.807	3.57353	3.545	4	4	3.19963	3.70717	0.19128	0.175618	1.1617	1.30943	0.0597192	0.0472772	0.338433	0.35568	0.1014	0.0854221	2.0675	24	1.10452	2.22846	24	1.40908	0.0496323	0.0354759	1.15862	0.0801194	0	1	0	0	0	0	0			0
211	WBGene00000239	2.51257	2.79571	3.38229	3.18657	2.72757	2.718	3.282	3.34457	4	4	2.96929	3.01804	0.390084	0.341903	1.08172	1.09977	0.133286	0.113571	0.363277	0.356642	0.119218	0.122245	0.191522	24	1.03756	0.211439	24	1.05143	0.849728	0.83433	1.01642	0.455577	0	0	0	0	0	0	0			0
212	WBGene00000240	4.785	4.997	4.906	4.343	4.649	4.632	4.276	4.761	4	4	4.75775	4.5795	0.289815	0.21027	1.55834	1.52078	0.0624292	0.0467867	0.224463	0.289318	0.0484095	0.0576792	-0.973563	24	1.66136	-0.997528	24	1.41964	0.339985	0.32846	-1.03892	0.272417	0	0	0	0	0	0	0			0
213	WBGene00000241	1.768	2.14858	1.75458	1.73533	1.668	1.70725	1.5805	1.60808	4	4	1.85163	1.64096	0.198426	0.0573347	0.612022	0.494823	0.102145	0.0348975	0.236598	0.227924	0.143084	0.133155	-1.28251	24	1.07755	-1.19923	24	1.15469	0.211915	0.242145	-1.12838	0.204619	0	0	0	0	0	0	0			0
214	WBGene00000242	2.19033	2.20253	2.17507	2.12873	2.2062	2.2416	1.973	2.17033	4	4	2.17417	2.14778	0.032306	0.1201	0.776562	0.763224	0.0149337	0.0573179	0.263018	0.265415	0.115662	0.125881	-0.141215	24	1.01831	-0.156043	24	1.18449	0.888879	0.877304	-1.01228	0.466255	0	0	0	0	0	0	0			0
215	WBGene00000244	2.17033	2.62167	1.922	1.89667	2.273	2.53033	2.329	2.13433	4	4	2.15267	2.31667	0.336163	0.164274	0.758039	0.838261	0.149991	0.0704256	0.311011	0.278954	0.149341	0.11512	0.785095	24	1.24305	0.850889	24	1.6829	0.44008	0.403241	1.07618	0.316994	0	0	0	0	0	0	0			0
216	WBGene00000245	3.916	4.183	4.589	4.237	4.571	4.111	4.911	4.691	4	4	4.23125	4.571	0.276724	0.337441	1.4409	1.51763	0.065079	0.0753906	0.264371	0.311593	0.0627032	0.0661792	1.66285	24	1.38914	1.68321	24	1.11394	0.109348	0.105301	1.0803	0.134725	0	1	0	0	0	0	0			0
217	WBGene00000246	2.1278	2.7616	2.753	2.4264	2.2376	2.4962	2.4022	2.445	4	4	2.5172	2.39525	0.302881	0.111904	0.9175	0.872651	0.123923	0.0474967	0.300338	0.260628	0.125676	0.106524	-0.613345	24	1.32794	-0.544453	24	1.3919	0.545418	0.591153	-1.05091	0.359243	0	0	0	0	0	0	0			0
218	WBGene00000247	4.79	4.497	4.669	4.761	4.605	4.562	4.232	4.511	4	4	4.67925	4.4775	0.131996	0.168116	1.54284	1.49852	0.0284599	0.0381757	0.19006	0.274747	0.0396534	0.0574661	-1.2078	24	2.0897	-1.26932	24	2.10021	0.238893	0.216499	-1.04506	0.220849	0	0	0	0	0	0	0			0
219	WBGene00000248	3.9424	4.0212	4.0922	4.0996	3.8602	3.7932	3.7742	3.805	4	4	4.03885	3.80815	0.0733733	0.0369469	1.39584	1.33711	0.018243	0.00967194	0.292955	0.280744	0.0655191	0.0784545	-1.13713	24	1.08888	-1.14909	24	1.43384	0.266709	0.261841	-1.06058	0.236543	0	0	0	0	0	0	0			0
220	WBGene00000249	5.372	5.347	5.501	5.779	4.756	4.008	4.67	4.696	4	4	5.49975	4.5325	0.198019	0.351516	1.70422	1.50889	0.0355804	0.080762	0.180603	0.310792	0.0324361	0.0711742	-5.38174	24	2.96134	-4.99462	24	4.81489	1.59e-05	4.21e-05	-1.2134	0.000284367	0	0	0	0	0	0	0	expressed in other tissue		0
221	WBGene00000250	5.162	5.144	5.326	5.443	4.454	4.258	4.99	5.191	4	4	5.26875	4.72325	0.142125	0.439279	1.66152	1.54924	0.0268846	0.0932577	0.16539	0.312624	0.0329371	0.0684629	-3.08473	24	3.57293	-2.95576	24	4.32057	0.00506977	0.00689181	-1.11549	0.016504	0	0	0	0	0	0	0			0
222	WBGene00000251	2.57753	3.21571	3.11918	2.73384	2.44705	3.41726	3.20153	2.60153	4	4	2.91157	2.91684	0.304837	0.466045	1.06454	1.06086	0.105458	0.160521	0.353988	0.405649	0.125793	0.132285	0.0196005	24	1.31318	-0.0402848	24	1.10589	0.984524	0.968199	1.00181	0.49226	0	0	0	0	0	0	0			0
223	WBGene00000252	3.264	4.193	4.078	3.415	2.864	3.992	3.907	2.906	4	4	3.7375	3.41725	0.466058	0.615807	1.31254	1.21651	0.125409	0.181617	0.359992	0.446488	0.098612	0.131711	-1.11675	24	1.53827	-1.1672	24	1.78397	0.275156	0.254594	-1.09372	0.241143	0	0	0	0	0	0	0			0
224	WBGene00000253	2.92125	3.67727	3.45563	3.21597	2.74388	3.3409	3.13007	3.12202	4	4	3.31753	3.08422	0.324466	0.248492	1.19558	1.12379	0.0989234	0.0824681	0.347638	0.323139	0.106009	0.102167	-0.983146	24	1.15738	-0.975256	24	1.07662	0.335344	0.339162	-1.07565	0.270229	0	0	0	0	0	0	0			0
225	WBGene00000254	5.538	5.412	5.293	5.573	4.437	4.404	4.788	4.981	4	4	5.454	4.6525	0.127674	0.279562	1.69614	1.53606	0.0235012	0.0598164	0.175916	0.270945	0.0319985	0.0598793	-4.96217	24	2.37221	-4.71578	24	3.50181	4.58e-05	8.55e-05	-1.17227	0.000604767	0	0	0	0	0	0	0			0
226	WBGene00000255	3.248	3.328	3.407	3.353	2.875	2.706	3.139	3.206	4	4	3.334	2.9815	0.0661362	0.232701	1.20402	1.09011	0.0198958	0.0787872	0.309286	0.334322	0.0904419	0.108711	-1.54794	24	1.16845	-1.61104	24	1.44479	0.134723	0.120245	-1.11823	0.153441	0	0	0	0	0	0	0			0
227	WBGene00000257	4.55197	4.02943	4.1714	4.28086	3.56474	3.07089	3.52489	3.76729	4	4	4.25841	3.48195	0.221122	0.293876	1.4479	1.24482	0.0514746	0.0869043	0.2763	0.309109	0.056616	0.0867848	-3.74564	24	1.25159	-3.91978	24	2.34968	0.000999401	0.000645166	-1.223	0.00525175	0	0	0	0	0	0	0			0
228	WBGene00000259	3.62151	3.46669	3.7989	3.71836	2.73479	2.80103	3.11182	3.18472	4	4	3.65137	2.95809	0.142886	0.223251	1.29452	1.0824	0.0394089	0.0755751	0.335246	0.340524	0.0783218	0.119806	-2.90161	24	1.03173	-2.96388	24	2.33987	0.0078305	0.00676081	-1.23437	0.02237	0	0	0	0	0	0	0			0
229	WBGene00000262	3.936	3.733	3.355	3.655	3.687	3.232	3.066	3.196	4	4	3.66975	3.29525	0.240953	0.270724	1.29848	1.19005	0.0664437	0.0798019	0.310499	0.343786	0.076321	0.0918338	-1.61684	24	1.2259	-1.81619	24	1.44783	0.118982	0.0818537	-1.11365	0.142005	0	0	0	0	0	0	0			0
230	WBGene00000263	3.645	3.708	3.785	3.867	3.972	3.579	3.971	3.716	4	4	3.75125	3.8095	0.0960846	0.195244	1.32184	1.3365	0.0255837	0.0515686	0.291013	0.291167	0.0780582	0.0804906	0.282998	24	1.00106	0.261518	24	1.06329	0.779605	0.795924	1.01553	0.436617	0	0	0	1	0	0	0			0
231	WBGene00000264	5.08462	4.717	4.89546	4.99792	4.21685	3.59938	4.22269	4.60138	4	4	4.92375	4.16008	0.158035	0.414838	1.59368	1.42167	0.0323002	0.102423	0.185704	0.349033	0.0379818	0.0804756	-3.86318	24	3.53257	-3.86591	24	4.48929	0.00074401	0.000738907	-1.18357	0.00432543	0	0	0	0	0	0	0			0
232	WBGene00000265	4.23923	3.90131	4.11046	4.15177	3.38077	2.97523	3.51585	3.86754	4	4	4.10069	3.43485	0.143354	0.368761	1.41069	1.22958	0.0353385	0.108674	0.291338	0.354315	0.0661119	0.112136	-2.90311	24	1.47906	-2.78259	24	2.87692	0.00780288	0.0103384	-1.19385	0.0223237	0	0	0	0	0	0	0			0
233	WBGene00000266	3.7	4.562	4.201	3.92	3.726	3.872	3.912	4.011	4	4	4.09575	3.88025	0.372368	0.118272	1.40688	1.35555	0.0903306	0.0306281	0.331679	0.275089	0.0806597	0.0731224	-1.00021	24	1.45375	-0.942917	24	1.21678	0.327189	0.355119	-1.05554	0.266605	0	0	1	0	0	0	0			0
234	WBGene00000267	2.987	4.077	4.215	3.867	2.607	3.14	3.11	3.096	4	4	3.7865	2.98825	0.55187	0.254829	1.32269	1.09179	0.156359	0.0892536	0.386595	0.362968	0.110484	0.107406	-3.01065	24	1.13443	-2.99702	24	1.05814	0.00605061	0.00624981	-1.26713	0.0186928	0	0	0	0	0	0	0			0
235	WBGene00000268	5.15025	4.9355	5.08075	4.86875	4.71075	4.617	4.75975	4.86725	4	4	5.00881	4.73869	0.129321	0.10418	1.61095	1.55558	0.0258219	0.0219686	0.193146	0.255889	0.037294	0.0513025	-1.68512	24	1.75521	-1.74598	24	1.89234	0.104926	0.0936053	-1.057	0.131244	0	0	0	0	0	0	0			0
236	WBGene00000269	3.685	3.596	3.581	3.603	2.758	3.064	3.011	3.061	4	4	3.61625	2.9735	0.0467431	0.145709	1.28538	1.08881	0.0128533	0.0501789	0.304739	0.321848	0.081102	0.10721	-2.90031	24	1.11544	-2.92441	24	1.74747	0.00785449	0.00742133	-1.21616	0.0224099	0	0	0	0	0	0	0			0
237	WBGene00000270	4.348	4.31	4.447	4.684	3.133	2.706	3.666	4.031	4	4	4.44725	3.384	0.168066	0.583329	1.49176	1.20764	0.0373324	0.175524	0.205267	0.431982	0.0406422	0.128757	-4.44622	24	4.42885	-4.20851	24	10.0366	0.000169823	0.000310724	-1.3142	0.00154185	0	0	0	0	0	0	0			0
238	WBGene00000271	4.73408	4.32096	4.50642	4.60358	3.58688	3.54021	3.88746	4.14267	4	4	4.54126	3.7893	0.173985	0.281381	1.51265	1.33014	0.0384963	0.0735392	0.210893	0.317946	0.0480705	0.0860394	-3.9418	24	2.27291	-3.70363	24	3.2036	0.000610314	0.00111018	-1.19844	0.00377102	0	0	0	0	0	0	0			0
239	WBGene00000272	2.586	2.483	1.747	1.57	1.997	2.326	1.402	1.721	4	4	2.0965	1.8615	0.512622	0.393701	0.717139	0.60415	0.249942	0.215944	0.391281	0.29987	0.177524	0.171676	-0.953398	24	1.70259	-0.91505	24	1.06929	0.349893	0.369268	-1.12624	0.277048	0	0	0	0	0	0	0			0
240	WBGene00000273	5.46913	5.82413	5.67213	5.602	5.984	6.09537	5.74613	5.85663	4	4	5.64184	5.92053	0.147832	0.151768	1.72995	1.77818	0.0261817	0.0256406	0.150097	0.182938	0.0265996	0.0303677	2.35544	24	1.48547	2.3892	24	1.30339	0.0270114	0.0250959	1.0494	0.0527186	0	0	1	0	0	0	0			0
241	WBGene00000274	4.24164	4.04355	4.11571	4.15437	3.50771	3.60588	3.74288	3.90627	4	4	4.13882	3.69068	0.0825132	0.173084	1.42026	1.30499	0.0199155	0.0467029	0.271555	0.305363	0.0684125	0.0852521	-2.19328	24	1.2645	-2.10908	24	1.55288	0.0382141	0.0455579	-1.12142	0.0672147	0	0	0	0	0	0	0			0
242	WBGene00000275	4.88818	4.44433	4.64718	4.82323	4.12472	3.632	4.03492	4.3601	4	4	4.70073	4.03794	0.198956	0.303378	1.54704	1.39357	0.0426853	0.0764891	0.192936	0.32099	0.0410321	0.0803012	-3.53952	24	2.76792	-3.4038	24	3.82997	0.00167061	0.00233566	-1.16414	0.00756649	0	0	0	0	0	0	0			0
243	WBGene00000276	5.227	5.321	5.057	5.26	4.353	4.518	4.655	4.766	4	4	5.21625	4.573	0.113082	0.178324	1.6516	1.5196	0.0218366	0.0391607	0.178675	0.273578	0.0349499	0.05811	-3.93719	24	2.34443	-3.89334	24	2.76446	0.000617452	0.000689601	-1.14066	0.00380345	0	0	0	1	0	0	0			0
244	WBGene00000277	4.966	5.271	4.906	4.91	5.198	5.359	5.064	4.921	4	4	5.01325	5.1355	0.174003	0.187066	1.61164	1.63568	0.0341722	0.0364099	0.19549	0.239205	0.0393469	0.0473016	0.791451	24	1.49723	0.781377	24	1.44521	0.436433	0.442221	1.02439	0.315588	0	0	1	0	0	0	0			0
245	WBGene00000279	4.313	4.304	4.187	3.958	3.29	3.829	3.828	3.816	4	4	4.1905	3.69075	0.165285	0.267232	1.43223	1.30376	0.0400083	0.0752636	0.254513	0.320119	0.066938	0.0908513	-2.44397	24	1.58199	-2.27681	24	1.84212	0.0222524	0.0320032	-1.13541	0.0460481	0	0	0	0	0	0	0			0
246	WBGene00000280	2.139	2.483	2.669	2.334	2.355	2.212	2.032	2.041	4	4	2.40625	2.16	0.224775	0.154136	0.874773	0.768225	0.093937	0.0706288	0.313544	0.277513	0.125767	0.13668	-1.17621	24	1.27652	-1.1473	24	1.18107	0.251045	0.262565	-1.114	0.22779	0	0	1	0	0	0	0			0
247	WBGene00000281	4.298	4.785	5.066	4.842	5.522	5.511	5.334	5.671	4	4	4.74775	5.5095	0.323434	0.13789	1.55588	1.70624	0.0696385	0.0250844	0.238817	0.235946	0.0509823	0.040621	4.53809	24	1.02449	4.61322	24	1.57521	0.00013443	0.000111039	1.16044	0.00131032	1	1	1	0	0	0	0		181713	0
248	WBGene00000282	4.785	4.977	4.565	4.698	4.84	4.92	4.577	4.586	4	4	4.75625	4.73075	0.172749	0.175445	1.55897	1.55357	0.036193	0.037041	0.193015	0.252205	0.0410897	0.0526966	-0.160586	24	1.70736	-0.161573	24	1.64474	0.873764	0.872995	-1.00539	0.462109	0	0	0	1	0	0	0			0
249	WBGene00000283	3.449	3.51	3.922	3.973	4.577	3.84	4.247	4.371	4	4	3.7135	4.25875	0.272143	0.310576	1.30996	1.44693	0.0734086	0.0743292	0.320454	0.296698	0.0839552	0.0727861	2.49705	24	1.16654	2.46548	24	1.33045	0.0197838	0.0212197	1.14683	0.0424958	0	1	1	0	0	0	0			0
250	WBGene00000284	2.39	3.111	2.626	2.507	2.635	3.292	2.721	2.066	4	4	2.6585	2.6785	0.316679	0.501743	0.972697	0.971748	0.114794	0.191254	0.345302	0.392331	0.132835	0.147954	0.0765339	24	1.29094	-0.00954025	24	1.2406	0.939629	0.992467	1.00752	0.480631	0	0	0	0	0	0	0			0
251	WBGene00000285	3.801	4.112	4.121	3.776	5.422	4.996	5.088	5.161	4	4	3.9525	5.16675	0.189681	0.183069	1.37348	1.64178	0.0480259	0.0350757	0.281995	0.244051	0.083849	0.0480201	6.51183	24	1.33512	5.55328	24	3.04894	9.82e-07	1.03e-05	1.30721	3.54e-05	1	1	1	1	0	0	0		179715	0
252	WBGene00000286	3.494	4.067	3.95	3.689	5.489	4.795	5.005	4.636	4	4	3.8	4.98125	0.258035	0.370702	1.33326	1.60365	0.0683734	0.0731195	0.298156	0.307794	0.0924968	0.0618237	5.51309	24	1.06569	4.86081	24	2.23843	1.14e-05	5.92e-05	1.31086	0.0002237	1	1	1	1	0	0	0		182789	0
253	WBGene00000287	1.918	3.055	2.352	2.569	1.728	2.847	2.406	2.361	4	4	2.4735	2.3355	0.472795	0.460546	0.891711	0.83257	0.193626	0.208167	0.364353	0.372597	0.15385	0.150718	-0.529614	24	1.04577	-0.549195	24	1.04199	0.601245	0.587946	-1.05909	0.378972	0	0	0	0	0	0	0			0
254	WBGene00000288	3.5	4.664	4.253	4.049	3.754	4.252	3.607	3.661	4	4	4.1165	3.8185	0.484086	0.295308	1.40968	1.33771	0.119915	0.0749574	0.352656	0.288367	0.0872672	0.0826368	-1.30832	24	1.49558	-1.19777	24	1.11521	0.203157	0.242704	-1.07804	0.199452	0	0	0	0	0	0	0			0
255	WBGene00000289	4.60409	4.5092	4.14017	4.36523	4.4786	4.30566	4.2134	4.40414	4	4	4.40467	4.35045	0.201832	0.115606	1.48187	1.47001	0.0462752	0.0266127	0.219531	0.256021	0.0494586	0.0598526	-0.321545	24	1.36006	-0.305343	24	1.46447	0.750581	0.762737	-1.01246	0.428015	0	0	1	0	0	0	0			0
256	WBGene00000292	5.493	5.311	5.374	5.38	5.265	5.218	4.931	5.306	4	4	5.3895	5.18	0.0757298	0.169849	1.68438	1.64439	0.014006	0.0332772	0.168782	0.24382	0.0306244	0.0462587	-1.41297	24	2.08683	-1.44149	24	2.28166	0.170504	0.162367	-1.04044	0.178343	0	0	1	0	0	0	0			0
257	WBGene00000293	5.93	5.696	5.662	5.731	5.696	5.424	5.364	5.426	4	4	5.75475	5.4775	0.120181	0.14848	1.74986	1.70038	0.0207061	0.0267938	0.135449	0.246186	0.0236282	0.0443406	-1.9734	24	3.3035	-1.96987	24	3.52161	0.0600721	0.060498	-1.05062	0.0907683	0	0	0	0	0	0	0			0
258	WBGene00000294	2.95983	3.3963	3.24743	2.96196	4.48269	4.55974	4.68633	4.47276	4	4	3.14138	4.55038	0.217085	0.0986213	1.14288	1.51504	0.0687498	0.0215366	0.340866	0.254614	0.101401	0.0644573	6.62339	24	1.79227	6.1946	24	2.47481	7.51e-07	2.12e-06	1.44853	2.94e-05	1	0	1	0	0	0	0		181729	0
259	WBGene00000295	1.9638	2.4188	2.266	2.1706	1.9352	2.4226	2.1422	2.041	4	4	2.2048	2.13525	0.190431	0.209381	0.787793	0.755081	0.0874494	0.0959474	0.287619	0.292069	0.130494	0.136007	-0.33934	24	1.03118	-0.347103	24	1.08628	0.737305	0.731539	-1.03257	0.423692	0	0	0	0	0	0	0			0
260	WBGene00000296	1.89389	2.20978	2.07522	1.93522	1.86622	2.08789	1.76278	1.89322	4	4	2.02853	1.90253	0.143603	0.135761	0.705454	0.64131	0.0701482	0.0703449	0.235267	0.214131	0.131583	0.121959	-0.792144	24	1.20716	-0.715047	24	1.16405	0.436037	0.481478	-1.06623	0.315424	0	0	0	0	0	0	0			0
261	WBGene00000298	5.126	4.851	5.383	5.02	4.812	4.225	4.852	4.886	4	4	5.095	4.69375	0.22291	0.31396	1.62755	1.54447	0.0435373	0.0692515	0.205762	0.290229	0.0387376	0.0606019	-2.25569	24	1.98953	-2.30997	24	2.44742	0.0334803	0.029803	-1.08549	0.0611999	0	0	1	0	0	0	0			0
262	WBGene00000301	5.965	5.706	4.863	5.174	5.696	5.001	4.532	4.866	4	4	5.427	5.02375	0.499797	0.489606	1.68818	1.61071	0.0926043	0.0955238	0.294459	0.335759	0.0538576	0.0656708	-1.80592	24	1.30018	-1.82437	24	1.4868	0.0834899	0.0805719	-1.08027	0.113079	0	0	0	0	0	0	0			0
263	WBGene00000302	3.007	3.343	3.416	2.853	2.847	3.259	3.218	2.816	4	4	3.15475	3.035	0.268684	0.235917	1.14616	1.10794	0.0857667	0.0778378	0.338011	0.329712	0.113473	0.110115	-0.507213	24	1.05098	-0.483464	24	1.06191	0.616635	0.633148	-1.03946	0.383839	0	0	0	0	0	0	0			0
264	WBGene00000366	5.03109	5.03105	5.04573	5.06124	4.80081	5.10867	5.00901	5.16121	4	4	5.04228	5.01993	0.0144051	0.159127	1.61785	1.61303	0.00285503	0.0320073	0.155183	0.249891	0.031266	0.0481869	-0.151982	24	2.59305	-0.16788	24	2.37528	0.880472	0.868085	-1.00445	0.464143	0	0	1	0	0	0	0			0
265	WBGene00000367	2.72324	3.27039	2.90661	2.68817	3.59583	3.74556	3.67376	3.66915	4	4	2.8971	3.67107	0.266655	0.0611544	1.06064	1.30038	0.0896195	0.0166638	0.350159	0.295495	0.117015	0.0846671	3.37847	24	1.4042	3.31966	24	1.9101	0.00248562	0.0028707	1.26715	0.0100045	0	0	0	0	0	0	0			0
266	WBGene00000368	3.40317	3.94967	3.353	3.17983	4.64017	4.61667	4.2575	4.09683	4	4	3.47142	4.40279	0.332879	0.268831	1.24126	1.48083	0.0929355	0.0614087	0.334459	0.293286	0.0944546	0.0643496	4.18749	24	1.30048	4.19234	24	2.15454	0.000327745	0.000323736	1.2683	0.00244029	1	0	1	0	0	0	0		171933	0
267	WBGene00000369	5.528	5.296	5.222	5.525	5.595	5.207	5.413	5.476	4	4	5.39275	5.42275	0.157373	0.162428	1.68474	1.69026	0.0292297	0.0301352	0.181421	0.240078	0.0331027	0.0459237	0.199391	24	1.75118	0.195316	24	1.92463	0.843637	0.84679	1.00556	0.454151	0	0	0	0	0	0	0			0
268	WBGene00000370	4.554	5.109	5.028	4.828	6.351	5.945	5.817	6.071	4	4	4.87975	6.046	0.247201	0.228248	1.58412	1.79887	0.0512718	0.0374734	0.217261	0.206226	0.045145	0.0338336	7.78662	24	1.10988	7.61312	24	1.78043	5.08e-08	7.5e-08	1.239	4.22e-06	1	1	1	1	0	0	0	muscle-enriched	178426	0
269	WBGene00000371	5.92	5.903	5.941	5.794	6.216	6.282	6.092	6.141	4	4	5.8895	6.18275	0.0655363	0.0835359	1.77312	1.82169	0.01118	0.0135021	0.112577	0.165917	0.0189476	0.0262609	2.92512	24	2.17209	2.99976	24	1.92093	0.00740885	0.00620922	1.04979	0.0215831	0	0	0	1	0	0	0			0
270	WBGene00000372	2.87289	3.181	2.94767	2.663	2.92444	3.00122	2.67056	2.46878	4	4	2.91614	2.76625	0.213772	0.243505	1.06825	1.01453	0.0733174	0.0892324	0.322618	0.349679	0.117573	0.11583	-0.630089	24	1.17479	-0.650873	24	1.03032	0.53459	0.521312	-1.05418	0.355192	0	0	0	0	0	0	0			0
271	WBGene00000373	3.1645	3.26375	3.38525	3.09638	3.05163	3.04025	2.95737	3.126	4	4	3.22747	3.04381	0.125648	0.0690409	1.17113	1.11292	0.0387705	0.0227128	0.326959	0.323587	0.101976	0.0902117	-0.798484	24	1.02095	-0.855156	24	1.27782	0.432421	0.400922	-1.06034	0.313719	0	0	0	0	0	0	0			0
272	WBGene00000375	4.3765	4.12483	4.40917	4.47933	3.39967	3.09117	3.71117	3.966	4	4	4.34746	3.542	0.154493	0.379431	1.46911	1.26033	0.0360471	0.108169	0.224507	0.352604	0.0531021	0.102885	-3.85377	24	2.4667	-3.60642	24	3.75386	0.000761835	0.00141483	-1.2274	0.00439163	0	0	0	0	0	0	0			0
273	WBGene00000376	4.3809	4.31003	4.25813	4.49997	3.85137	3.87963	3.95883	4.308	4	4	4.36226	3.99946	0.104691	0.210664	1.47278	1.38515	0.0238935	0.0515485	0.205118	0.285744	0.0490426	0.0767432	-2.06287	24	1.94064	-1.92428	24	2.44868	0.0501054	0.0662553	-1.09071	0.080604	0	0	0	0	0	0	0			0
274	WBGene00000377	4.954	4.86715	4.41008	4.63008	4.63985	4.55069	4.09723	4.10408	4	4	4.71533	4.34796	0.245263	0.28789	1.54979	1.46806	0.052441	0.0662013	0.20237	0.286552	0.0452518	0.0697007	-2.0944	24	2.005	-1.96697	24	2.37247	0.046961	0.0608511	-1.08449	0.0772253	0	1	0	1	0	0	0			0
275	WBGene00000378	5.16969	4.92638	4.83285	4.93038	5.06738	4.92508	4.72946	4.83869	4	4	4.96483	4.89015	0.14382	0.142713	1.60207	1.58691	0.0286902	0.0291318	0.169323	0.27625	0.0369586	0.0562204	-0.460926	24	2.6618	-0.450729	24	2.31397	0.649001	0.656231	-1.01527	0.395133	0	0	0	1	0	0	0			0
276	WBGene00000379	4.975	4.81808	4.85677	4.99146	4.72254	4.683	4.68677	4.88331	4	4	4.91033	4.7439	0.0859145	0.0946283	1.59123	1.55671	0.0175091	0.0197728	0.176484	0.256851	0.0364468	0.0519414	-1.06805	24	2.11812	-1.08782	24	2.03099	0.296124	0.287479	-1.03508	0.251857	0	1	0	0	0	0	0			0
277	WBGene00000380	5.98	5.842	5.705	5.895	6.144	6.016	5.62	5.886	4	4	5.8555	5.9165	0.115316	0.223978	1.76724	1.7772	0.0197576	0.0381691	0.129345	0.201689	0.0219018	0.0337446	0.509179	24	2.43147	0.495482	24	2.37382	0.615276	0.624767	1.01042	0.383611	0	0	0	0	0	0	0			0
278	WBGene00000381	5.28475	5.32338	5.07875	5.165	5.04188	4.8865	4.814	4.84413	4	4	5.21297	4.89663	0.112038	0.101297	1.65098	1.58839	0.0215406	0.0205304	0.174242	0.268929	0.0345221	0.0580415	-1.97442	24	2.38216	-1.85359	24	2.82673	0.0599485	0.0761306	-1.0646	0.0905994	0	1	0	1	0	0	0			0
279	WBGene00000382	4.46682	4.10673	4.29718	4.467	3.809	3.45464	3.77173	4.14509	4	4	4.33443	3.79511	0.171598	0.282341	1.46599	1.33164	0.0399915	0.0745001	0.229485	0.324589	0.0513001	0.0826286	-2.71342	24	2.00059	-2.76294	24	2.59433	0.0121275	0.0108196	-1.14211	0.030366	0	0	0	0	0	0	0			0
280	WBGene00000383	5.26664	5.19657	5.10264	5.14977	5.39552	5.18477	5.00848	5.10316	4	4	5.1789	5.17298	0.069939	0.164925	1.64453	1.64307	0.0134869	0.0316639	0.164354	0.241917	0.0295222	0.0467501	-0.0404861	24	2.16656	-0.0525676	24	2.50766	0.968041	0.958512	-1.00114	0.487617	0	1	1	0	0	0	0			0
281	WBGene00000386	5.09421	4.64871	4.79407	4.99364	4.36929	3.8775	4.37271	4.686	4	4	4.88266	4.32637	0.199709	0.33407	1.58506	1.46244	0.0410229	0.0786653	0.200009	0.307512	0.0419038	0.0735127	-3.0329	24	2.36387	-2.89828	24	3.07765	0.00573836	0.00789194	-1.12858	0.0179654	0	0	0	0	0	0	0			0
282	WBGene00000387	4.06562	3.7005	3.0785	3.4565	3.83162	3.53475	3.092	3.60975	4	4	3.57528	3.51703	0.415137	0.310124	1.26893	1.2546	0.117077	0.0905442	0.365199	0.342276	0.103119	0.0904938	-0.232756	24	1.13843	-0.208994	24	1.2985	0.817924	0.836217	-1.01656	0.446983	0	0	0	0	0	0	0			0
283	WBGene00000388	4.172	3.566	4.054	4.616	3.765	2.689	3.4	3.796	4	4	4.102	3.4125	0.431546	0.514761	1.40727	1.21816	0.1063	0.160676	0.355328	0.406772	0.0849297	0.124515	-2.55317	24	1.31052	-2.50937	24	2.14943	0.0174516	0.0192483	-1.20205	0.0391063	0	0	0	0	0	0	0			0
284	WBGene00000389	1.923	3.257	3.208	2.339	1.549	1.989	2.81	1.901	4	4	2.68175	2.06225	0.658542	0.533517	0.962516	0.700202	0.256182	0.247207	0.45099	0.368067	0.174241	0.175477	-2.12842	24	1.50134	-2.12152	24	1.01424	0.0437674	0.0443994	-1.3004	0.0735241	0	0	0	0	0	0	0			0
285	WBGene00000390	5.965	5.954	5.922	5.976	6.255	6.26	5.95	6.096	4	4	5.95425	6.14025	0.0233006	0.147942	1.7841	1.81465	0.00391774	0.0242118	0.102935	0.17688	0.0171639	0.0284567	1.81773	24	2.95278	1.83838	24	2.74875	0.0816119	0.0784144	1.03124	0.111564	0	0	0	1	0	0	0			0
286	WBGene00000391	3.715	4.127	4.21	3.603	3.2	3.379	3.863	3.486	4	4	3.91375	3.482	0.299615	0.280065	1.36229	1.24523	0.0767676	0.0791526	0.317694	0.304463	0.0873837	0.0895466	-1.96236	24	1.0888	-1.87115	24	1.05012	0.0614153	0.0735648	-1.12399	0.0921654	0	0	0	0	0	1	0			0
287	WBGene00000392	5.398	4.906	5.085	5.241	4.554	4.317	4.714	4.761	4	4	5.1575	4.5865	0.210809	0.200327	1.63982	1.52239	0.0409605	0.0442029	0.200906	0.275584	0.039195	0.0549163	-3.34856	24	1.88157	-3.48111	24	1.96309	0.00267474	0.00193044	-1.1245	0.0105685	0	1	0	0	0	1	0			0
288	WBGene00000393	3.81727	3.74245	3.80964	3.90127	4.00173	3.53236	3.65936	3.87373	4	4	3.81766	3.7668	0.0650935	0.210656	1.33953	1.32505	0.0170257	0.0559903	0.276106	0.323978	0.0720719	0.0817881	-0.238981	24	1.37683	-0.265634	24	1.2878	0.81315	0.792789	-1.0135	0.445584	0	0	0	0	0	0	0			0
289	WBGene00000395	2.91956	3.34442	2.58857	2.91067	2.53244	2.9608	2.30295	2.8141	4	4	2.9408	2.65257	0.310016	0.293124	1.07455	0.970869	0.104732	0.111978	0.350859	0.308964	0.123747	0.126047	-1.23307	24	1.28958	-1.17398	24	1.03752	0.229491	0.251921	-1.10866	0.215243	0	0	1	0	0	0	0			0
290	WBGene00000396	4.09052	4.09788	3.58078	3.77583	3.44281	3.74316	3.26817	3.76522	4	4	3.88625	3.55484	0.252993	0.241147	1.35584	1.26656	0.0657215	0.0684428	0.304701	0.326735	0.0743112	0.0909931	-1.48362	24	1.14986	-1.51977	24	1.49937	0.150924	0.141634	-1.09323	0.165124	0	0	0	0	0	0	0			0
291	WBGene00000397	2.6369	3.36545	2.62169	2.49805	2.40317	3.01752	2.43586	2.50169	4	4	2.78052	2.58956	0.394877	0.288231	1.01562	0.947123	0.134168	0.106195	0.348721	0.309889	0.134033	0.12234	-0.818669	24	1.26632	-0.754946	24	1.20029	0.42103	0.457626	-1.07374	0.308619	0	0	0	0	0	0	0			0
292	WBGene00000399	1.85744	2.72136	1.84603	1.69026	1.8173	2.86313	1.89708	1.6151	4	4	2.02877	2.04815	0.46798	0.556131	0.689564	0.692244	0.212133	0.249245	0.324156	0.383319	0.161377	0.185656	0.0771981	24	1.39834	0.0217947	24	1.32353	0.939106	0.982792	1.00955	0.480494	0	0	0	0	0	0	0			0
293	WBGene00000401	2.19611	3.26522	2.08989	2.03656	3.11544	2.63878	1.97467	2.12433	4	4	2.39694	2.46331	0.582639	0.519534	0.854597	0.885136	0.221378	0.207871	0.399299	0.393834	0.164406	0.156618	0.236648	24	1.02795	0.268994	24	1.10193	0.814938	0.790233	1.02769	0.446203	0	0	1	0	0	0	0			0
294	WBGene00000402	2.09575	2.92866	2.17179	1.95038	1.99399	2.98557	2.12508	1.97605	4	4	2.28664	2.27017	0.437755	0.481535	0.814508	0.804709	0.179033	0.195418	0.362522	0.35911	0.14793	0.143995	-0.0645645	24	1.01909	-0.0949317	24	1.05539	0.949056	0.925157	-1.00726	0.482785	0	0	0	1	0	0	0			0
295	WBGene00000403	3.97634	4.61066	4.19291	3.98571	4.212	4.62346	4.10057	3.93743	4	4	4.19141	4.21836	0.296836	0.292655	1.43121	1.43768	0.0692387	0.0681906	0.284105	0.308445	0.0720399	0.0701542	0.128567	24	1.17868	0.12873	24	1.05448	0.898772	0.898644	1.00643	0.46881	0	0	0	0	0	0	0			0
296	WBGene00000405	6.03	5.701	5.709	6.188	4.996	4.339	4.813	5.476	4	4	5.907	4.906	0.242026	0.470155	1.77551	1.58699	0.0408468	0.0962874	0.160636	0.353789	0.0271204	0.0724142	-5.15249	24	4.85069	-4.87589	24	7.12944	2.83e-05	5.69e-05	-1.20404	0.00042747	0	0	0	0	0	0	0			0
297	WBGene00000406	2.78467	2.64033	2.598	2.29867	2.484	2.41267	2.33867	2.85767	4	4	2.58042	2.52325	0.204124	0.230705	0.945526	0.922547	0.0810778	0.0884663	0.309063	0.331521	0.117676	0.125701	-0.252258	24	1.15061	-0.266906	24	1.14105	0.802989	0.791822	-1.02266	0.44279	0	0	0	0	0	0	0			0
298	WBGene00000407	5.177	5.159	5.137	4.842	4.353	4.187	4.276	4.386	4	4	5.07875	4.3005	0.158679	0.0885983	1.62469	1.45857	0.0317346	0.0206778	0.194571	0.270257	0.0367817	0.0578106	-4.67401	24	1.92929	-4.84882	24	2.4703	9.51e-05	6.1e-05	-1.18097	0.001026	0	0	0	0	0	0	0			0
299	WBGene00000408	5.608	5.357	5.388	5.717	4.868	4.464	4.823	5.226	4	4	5.5175	4.84525	0.173706	0.311627	1.70755	1.57644	0.0314183	0.0644783	0.168141	0.28489	0.0306533	0.064519	-4.0643	24	2.87085	-3.67102	24	4.43016	0.000447837	0.00120441	-1.13874	0.00302745	0	0	0	0	0	0	0			0
300	WBGene00000409	4.70133	4.40544	4.68589	4.78233	3.91133	3.75567	4.152	4.241	4	4	4.64375	4.015	0.164404	0.221995	1.53504	1.38888	0.0359286	0.0555639	0.186609	0.297312	0.0432635	0.071125	-3.58239	24	2.53839	-3.51136	24	2.70271	0.00150196	0.00179131	-1.1566	0.00704839	0	0	0	0	0	0	0			0
301	WBGene00000410	3.8585	3.65175	3.734	3.826	3.498	3.365	3.34975	3.40475	4	4	3.76756	3.40437	0.0934943	0.0665834	1.3262	1.22492	0.0249024	0.0194333	0.306506	0.318905	0.0730282	0.0905864	-1.6422	24	1.08255	-1.7408	24	1.53866	0.113589	0.094527	-1.10668	0.138155	0	0	0	0	0	0	0			0
302	WBGene00000411	5.679	5.685	5.577	5.621	4.985	4.513	5.187	5.451	4	4	5.6405	5.034	0.0512348	0.396291	1.72994	1.61384	0.00909576	0.0800819	0.132158	0.295877	0.0235939	0.0606986	-3.74324	24	5.01228	-3.56569	24	6.61849	0.00100541	0.00156555	-1.12048	0.00527297	0	0	0	0	0	0	0			0
303	WBGene00000412	2.33	2.408	3.057	2.291	2.002	1.751	2.751	2.146	4	4	2.5215	2.1625	0.360298	0.42493	0.917772	0.757476	0.134705	0.189504	0.327872	0.348981	0.128726	0.160899	-1.49946	24	1.13291	-1.55585	24	1.56232	0.146795	0.132833	-1.16601	0.162054	0	0	0	0	0	0	0			0
304	WBGene00000413	4.34764	3.8725	3.90036	4.03941	3.61677	3.19582	3.37886	3.66236	4	4	4.03998	3.46345	0.217712	0.217452	1.39518	1.24077	0.0529513	0.0634165	0.30992	0.328622	0.0727204	0.0812698	-2.55261	24	1.12433	-2.83172	24	1.24895	0.0174734	0.00922262	-1.16646	0.0391418	0	0	0	0	0	0	0			0
305	WBGene00000414	4.042	4.502	4.333	4.165	3.972	4.106	3.907	4.211	4	4	4.2605	4.049	0.200367	0.13612	1.44856	1.39805	0.0469308	0.0335503	0.269117	0.287392	0.0578382	0.0667649	-1.07436	24	1.14043	-1.14367	24	1.3325	0.293345	0.26404	-1.05224	0.250449	0	0	0	1	0	0	0			0
306	WBGene00000415	4.69747	4.66391	4.46547	4.49249	4.95321	5.0084	4.64879	4.63437	4	4	4.57983	4.81119	0.117778	0.197229	1.52141	1.57031	0.0257173	0.0409859	0.212918	0.243543	0.0440752	0.050614	1.43039	24	1.30836	1.45722	24	1.31872	0.165496	0.158016	1.05052	0.174941	0	0	0	0	0	0	0			0
307	WBGene00000416	5.146	4.977	5.024	5.164	4.532	3.916	3.991	4.331	4	4	5.07775	4.1925	0.0915364	0.289538	1.62475	1.43152	0.0180442	0.0687696	0.187049	0.297599	0.034421	0.0731739	-5.03699	24	2.53134	-4.77899	24	4.51924	3.79e-05	7.28e-05	-1.21115	0.000522355	0	0	0	0	0	0	0			0
308	WBGene00000417	5.05886	4.85129	5.03443	5.171	4.65029	4.55386	4.78471	5.09029	4	4	5.02889	4.76979	0.132498	0.233701	1.61494	1.56142	0.0264927	0.0483936	0.175006	0.255493	0.0343829	0.0523966	-1.67337	24	2.13134	-1.70804	24	2.32231	0.107241	0.100535	-1.05432	0.133015	0	0	0	0	0	0	0			0
309	WBGene00000418	3.77214	3.352	3.51529	3.66357	3.29757	2.95057	3.221	3.54171	4	4	3.57575	3.25271	0.182577	0.243467	1.27319	1.17737	0.0513485	0.0753121	0.307248	0.300468	0.0947121	0.0986954	-1.50338	24	1.04564	-1.40096	24	1.08588	0.145788	0.174024	-1.09931	0.161349	0	0	0	0	0	0	0			0
310	WBGene00000419	4.60229	4.36385	4.51279	4.5799	3.65	3.51579	3.80191	4.01408	4	4	4.51471	3.74545	0.107524	0.213854	1.50713	1.31933	0.0240126	0.0568212	0.197963	0.340723	0.044462	0.081771	-3.90431	24	2.96234	-4.03535	24	3.38237	0.000670804	0.000481866	-1.20539	0.00402128	0	0	0	0	0	0	0			0
311	WBGene00000420	4.91944	4.73944	4.73322	4.79489	4.84644	4.56522	4.50989	4.66878	4	4	4.79675	4.64758	0.0863657	0.148029	1.56782	1.53597	0.0178905	0.0316216	0.19368	0.253291	0.0382886	0.0537949	-0.935639	24	1.71029	-0.964643	24	1.97398	0.358779	0.344344	-1.0321	0.281101	0	0	0	0	0	0	0			0
312	WBGene00000421	4.95909	4.90673	4.80208	4.82142	4.44745	4.43745	4.43446	4.54638	4	4	4.87233	4.46644	0.0735701	0.0535877	1.58349	1.49654	0.0150803	0.0119291	0.18305	0.272687	0.0381852	0.0512852	-2.47173	24	2.21917	-2.71974	24	1.80382	0.0209277	0.0119525	-1.09088	0.0442065	0	0	0	0	0	0	0			0
313	WBGene00000422	3.344	3.1135	2.7965	3.341	3.1275	2.318	2.507	2.6785	4	4	3.14875	2.65775	0.25846	0.34605	1.14439	0.971321	0.0842731	0.127168	0.335919	0.33809	0.113285	0.130311	-2.06043	24	1.01296	-2.00463	24	1.32318	0.0503561	0.0564102	-1.18474	0.080866	0	0	0	0	0	0	0			0
314	WBGene00000423	4.745	4.431	4.319	4.16	3.715	3.682	3.779	3.796	4	4	4.41375	3.743	0.247245	0.0535724	1.48356	1.31981	0.0554481	0.0143256	0.226609	0.321874	0.051554	0.0800305	-3.40791	24	2.01751	-3.44026	24	2.40983	0.00231218	0.00213517	-1.1792	0.00951267	0	0	0	0	0	0	0			0
315	WBGene00000424	4.202	4.193	4.489	4.338	4.319	4.562	4.601	4.651	4	4	4.3055	4.53325	0.139161	0.147405	1.45951	1.51104	0.0320988	0.0329696	0.244521	0.267635	0.0496368	0.0653716	1.25649	24	1.19799	1.2556	24	1.73448	0.221031	0.22135	1.0529	0.210052	0	0	0	0	0	0	0			0
316	WBGene00000425	2.95541	3.10107	2.49861	2.5615	2.67486	3.12	2.9802	2.95707	4	4	2.77915	2.93303	0.294832	0.18656	1.01793	1.07448	0.105983	0.0648591	0.328872	0.330793	0.1313	0.122237	0.659801	24	1.01172	0.63048	24	1.15378	0.515664	0.534339	1.05537	0.347609	0	1	1	0	0	0	0			0
317	WBGene00000426	3.80225	3.44705	3.73305	3.68185	3.48205	3.31615	3.43275	3.4635	4	4	3.66605	3.42361	0.15411	0.0744707	1.29844	1.23052	0.0426981	0.0219446	0.321193	0.320863	0.0719415	0.100921	-1.068	24	1.00206	-1.09605	24	1.96792	0.296145	0.283933	-1.07081	0.251857	0	0	0	0	0	0	0			0
318	WBGene00000427	1.436	1.077	1.822	1.522	1.197	1.018	1.274	1.416	4	4	1.46425	1.22625	0.306638	0.16584	0.364	0.196914	0.218178	0.138063	0.25778	0.214162	0.184447	0.185587	-1.42032	24	1.44882	-1.27715	24	1.0124	0.168376	0.213767	-1.19409	0.176889	0	0	0	0	0	0	0			0
319	WBGene00000428	2.038	2.327	2.253	1.926	2.098	1.87	1.811	1.666	4	4	2.136	1.86125	0.186077	0.179606	0.756064	0.617807	0.0876771	0.0954675	0.27873	0.245334	0.132819	0.133847	-1.47985	24	1.29079	-1.46644	24	1.01554	0.151921	0.155511	-1.14762	0.16573	0	0	1	0	0	0	0			0
320	WBGene00000429	2.706	2.949	2.286	2.43	2.696	2.19	2.131	2.306	4	4	2.59275	2.33075	0.294575	0.25412	0.947908	0.841944	0.11309	0.105108	0.333851	0.317307	0.134702	0.130241	-1.13768	24	1.10699	-1.13107	24	1.06968	0.266485	0.269202	-1.11241	0.236427	0	0	1	0	0	0	0			0
321	WBGene00000430	2.234	2.782	2.466	2.315	2.058	1.924	1.894	2.321	4	4	2.44925	2.04925	0.24177	0.194692	0.892243	0.714208	0.0963738	0.0924951	0.275772	0.279448	0.127331	0.134642	-2.03765	24	1.02684	-1.92143	24	1.11812	0.0527537	0.0666301	-1.19519	0.0834103	0	0	0	0	0	0	0			0
322	WBGene00000431	2.676	3.156	2.617	2.209	2.405	2.706	1.82	2.141	4	4	2.6645	2.268	0.387918	0.377468	0.972049	0.808283	0.145939	0.169229	0.360616	0.31635	0.143954	0.139375	-1.65308	24	1.29944	-1.63464	24	1.06678	0.111337	0.115175	-1.17482	0.136247	0	0	1	0	0	0	0			0
323	WBGene00000432	1.667	1.72	1.553	1.599	1.398	1.8	2.071	1.511	4	4	1.63475	1.695	0.0736405	0.302471	0.490729	0.515908	0.0450341	0.176552	0.209736	0.272374	0.139401	0.152783	0.350527	24	1.68649	0.243484	24	1.2012	0.729001	0.8097	1.03686	0.421129	0	0	0	0	0	0	0			0
324	WBGene00000433	2.078	2.084	1.78	2.051	2.562	2.011	1.491	1.586	4	4	1.99825	1.9125	0.146206	0.488473	0.690159	0.625021	0.076015	0.246876	0.247063	0.322134	0.127006	0.177107	-0.422446	24	1.70004	-0.597765	24	1.94457	0.67646	0.555596	-1.04484	0.404434	0	0	0	0	0	0	0			0
325	WBGene00000434	1.948	2.433	2.04	2.002	1.555	2.147	1.82	1.751	4	4	2.10575	1.81825	0.221408	0.24624	0.740756	0.591143	0.100711	0.133319	0.273858	0.249481	0.131986	0.1445	-1.55213	24	1.20497	-1.52897	24	1.19861	0.133719	0.139347	-1.15812	0.15272	0	0	0	0	0	0	0			0
326	WBGene00000435	3.469	3.839	3.638	3.54	2.719	3.113	3.302	3.231	4	4	3.6215	3.09125	0.160704	0.260121	1.28616	1.12579	0.0439286	0.0871528	0.306952	0.324205	0.0826584	0.100757	-2.37534	24	1.11557	-2.46105	24	1.48584	0.0258664	0.0214283	-1.17153	0.0509984	0	0	0	0	0	0	0			0
327	WBGene00000436	2.309	2.65	1.922	1.854	2.691	2.809	2.165	2.486	4	4	2.18375	2.53775	0.369831	0.282065	0.770521	0.926459	0.166548	0.114481	0.332643	0.353409	0.149704	0.138939	1.45879	24	1.12875	1.52698	24	1.16096	0.157587	0.139839	1.16211	0.169685	0	0	0	0	0	0	0			0
328	WBGene00000437	3.997	4.153	3.402	3.348	4.722	4.382	4.242	4.246	4	4	3.725	4.398	0.409726	0.22559	1.31053	1.48019	0.110041	0.0503445	0.353723	0.300008	0.0955198	0.06321	2.90202	24	1.39015	2.96248	24	2.28358	0.00782302	0.00678318	1.18067	0.0223686	0	1	1	0	0	0	0			0
329	WBGene00000438	1.591	2.569	2.442	2.32	2.142	2.169	2.278	2.156	4	4	2.2305	2.18625	0.438286	0.0621524	0.785566	0.78189	0.218143	0.0280754	0.34986	0.25284	0.159543	0.112913	-0.205023	24	1.91468	-0.0376178	24	1.99649	0.839283	0.970304	-1.02024	0.452946	0	0	0	0	0	0	0			0
330	WBGene00000439	2.119	2.382	1.766	1.82	1.667	1.832	1.609	1.851	4	4	2.02175	1.73975	0.285977	0.120104	0.69661	0.551943	0.139311	0.0693478	0.284235	0.222764	0.132626	0.131012	-1.56178	24	1.62804	-1.55201	24	1.02479	0.131432	0.133747	-1.16209	0.150992	0	0	0	0	0	0	0			0
331	WBGene00000440	1.556	2.114	1.236	1.392	1.745	1.696	1.25	1.311	4	4	1.5745	1.5005	0.382662	0.256035	0.433331	0.39474	0.230236	0.172132	0.276505	0.240441	0.174937	0.161121	-0.403903	24	1.32248	-0.324521	24	1.17885	0.68986	0.748356	-1.04932	0.408536	0	0	0	0	0	0	0			0
332	WBGene00000441	2.90691	3.39627	3.26218	2.99455	4.25509	4.56855	4.16882	3.94418	4	4	3.13998	4.23416	0.228103	0.258591	1.14224	1.4418	0.0725622	0.0607425	0.333513	0.27376	0.102965	0.0676458	5.07175	24	1.48417	4.86303	24	2.31684	3.47e-05	5.88e-05	1.34847	0.00049177	1	1	0	0	0	0	0		180671	0
333	WBGene00000442	2.535	2.645	3.085	2.944	2.002	1.913	2.633	2.881	4	4	2.80225	2.35725	0.255728	0.473959	1.0273	0.84227	0.0913197	0.201543	0.303126	0.355777	0.111306	0.156349	-1.90415	24	1.37755	-1.92814	24	1.97312	0.0689464	0.0657495	-1.18878	0.0998332	0	0	0	0	0	0	0			0
334	WBGene00000443	3.836	3.945	3.676	3.752	3.312	3.72	3.218	3.361	4	4	3.80225	3.40275	0.115442	0.219665	1.33525	1.22307	0.0302943	0.063077	0.275367	0.33547	0.0822221	0.0913862	-1.84096	24	1.48417	-1.82509	24	1.23533	0.0780236	0.0804593	-1.11741	0.108687	0	0	1	0	0	0	0			0
335	WBGene00000444	3.36829	3.03614	2.92143	3.14814	2.87214	2.994	3.15986	3.38814	4	4	3.1185	3.10354	0.190518	0.223394	1.13597	1.13062	0.0605435	0.0714184	0.348849	0.319333	0.107789	0.101559	-0.0632825	24	1.1934	-0.0722495	24	1.12645	0.950066	0.943002	-1.00482	0.482986	0	0	0	0	0	0	0			0
336	WBGene00000445	2.078	2.939	1.908	1.969	1.991	2.831	2.426	2.141	4	4	2.2235	2.34725	0.482155	0.369535	0.783264	0.844196	0.199672	0.154304	0.36497	0.323037	0.159228	0.149308	0.507799	24	1.27647	0.558288	24	1.13728	0.616229	0.581819	1.05566	0.383739	0	0	1	0	0	0	0			0
337	WBGene00000446	2.666	2.145	2.343	2.31	2.019	2.06	2.131	2.401	4	4	2.366	2.15275	0.21795	0.171846	0.8581	0.764446	0.0903658	0.0775613	0.279877	0.262979	0.118543	0.134653	-1.11055	24	1.13264	-1.04408	24	1.29027	0.277764	0.306851	-1.09906	0.242322	0	0	0	0	0	0	0			0
338	WBGene00000447	1.968	2.069	1.666	1.902	1.846	2.071	1.688	2.131	4	4	1.90125	1.934	0.17121	0.204807	0.639354	0.655297	0.0926409	0.107544	0.222745	0.243919	0.127204	0.138735	0.198292	24	1.19915	0.16941	24	1.18952	0.844487	0.866894	1.01723	0.454389	0	0	0	0	0	0	0			0
339	WBGene00000448	2.3612	3.096	2.1462	2.2581	1.9521	2.7743	1.9137	2.1135	4	4	2.46537	2.1884	0.429486	0.400078	0.891876	0.771672	0.163542	0.171278	0.340818	0.31692	0.145848	0.148344	-1.19027	24	1.1565	-1.15562	24	1.03453	0.24558	0.25921	-1.12657	0.224677	0	0	0	0	0	0	0			0
340	WBGene00000449	3.484	4.001	2.792	2.867	2.333	3.031	2.377	2.581	4	4	3.286	2.5805	0.568632	0.319176	1.17869	0.942516	0.170144	0.119284	0.446075	0.345084	0.128995	0.130109	-2.50189	24	1.67095	-2.57806	24	1.01734	0.0195715	0.0165014	-1.2734	0.042193	0	0	0	0	0	0	0			0
341	WBGene00000450	1.014	1.274	0.678	0.806	1.034	1.002	1.245	1.036	4	4	0.943	1.07925	0.26051	0.111593	-0.0870538	0.0724839	0.274501	0.098957	0.215555	0.211514	0.240815	0.208941	0.902328	24	1.03858	1.00079	24	1.32837	0.37585	0.326913	1.14449	0.289245	0	0	0	0	0	0	0			0
342	WBGene00000451	2.204	2.246	1.416	1.632	1.297	1.496	1.013	1.571	4	4	1.8745	1.34425	0.414572	0.249267	0.609267	0.281869	0.227548	0.196877	0.322164	0.229143	0.171733	0.176454	-2.68248	24	1.97671	-2.6593	24	1.05573	0.0130187	0.0137264	-1.39446	0.0318293	0	0	0	0	0	0	0			0
343	WBGene00000452	2.269	2.62	1.874	2.224	2.226	2.147	1.914	2.081	4	4	2.24675	2.092	0.305107	0.132647	0.802474	0.73658	0.137276	0.0644311	0.295172	0.266888	0.145218	0.13093	-0.777757	24	1.22319	-0.674008	24	1.23016	0.444312	0.506747	-1.07397	0.318477	0	0	0	1	0	0	0			0
344	WBGene00000453	3.2636	3.5386	2.8994	2.876	3.0098	3.4176	3.0184	3.23	4	4	3.1444	3.16895	0.317105	0.194549	1.14187	1.15201	0.0996971	0.0607905	0.33883	0.334873	0.111602	0.10199	0.103067	24	1.02377	0.134123	24	1.19737	0.918766	0.894423	1.00781	0.474734	0	0	0	0	0	0	0			0
345	WBGene00000454	2.053	2.387	1.775	1.637	2.131	2.065	2.185	2.136	4	4	1.963	2.12925	0.331409	0.0492773	0.664001	0.755568	0.166266	0.0232187	0.314717	0.268805	0.141886	0.130767	0.803359	24	1.37077	0.9491	24	1.1773	0.429652	0.35203	1.08469	0.312462	0	1	1	0	0	0	0			0
346	WBGene00000455	2.601	3.475	2.437	2.824	3.771	4.361	4.203	4.311	4	4	2.83425	4.1615	0.45566	0.268554	1.0326	1.42425	0.15427	0.0664216	0.375798	0.312215	0.131012	0.0710671	5.43318	24	1.44877	5.25543	24	3.39845	1.39e-05	2.18e-05	1.46829	0.00026011	1	1	1	0	0	0	0		178919	0
347	WBGene00000457	2.279	1.978	1.477	1.964	1.807	1.062	1.048	1.251	4	4	1.9245	1.292	0.331838	0.355594	0.642705	0.230662	0.181859	0.253783	0.284393	0.273693	0.150744	0.204047	-3.20498	24	1.07972	-3.24839	24	1.83222	0.00379469	0.0034153	-1.48955	0.0135263	0	0	0	0	0	0	0			0
348	WBGene00000458	3.419	3.586	3.284	3.161	2.523	2.798	2.711	2.941	4	4	3.3625	2.74325	0.182491	0.174788	1.21158	1.00761	0.0541322	0.0642151	0.328646	0.300109	0.0997565	0.114882	-2.7828	24	1.19922	-2.68131	24	1.32623	0.0103333	0.0130534	-1.22574	0.027296	0	0	0	0	0	0	0			0
349	WBGene00000459	4.92486	4.694	4.9555	5.00671	4.13336	4.312	4.47429	4.76279	4	4	4.89527	4.42061	0.138362	0.267255	1.58796	1.48492	0.0286058	0.0600825	0.190367	0.28503	0.0372683	0.0693924	-2.76967	24	2.2418	-2.6165	24	3.46692	0.0106525	0.0151288	-1.10737	0.0279194	0	0	0	0	0	0	0			0
350	WBGene00000460	3.441	3.08	3.134	3.30467	3.35867	2.76333	2.86067	3.23933	4	4	3.23992	3.0555	0.164741	0.288112	1.17458	1.1136	0.0505983	0.094447	0.33359	0.378692	0.110457	0.10596	-0.730843	24	1.28868	-0.796842	24	1.08668	0.47195	0.433355	-1.06036	0.330399	0	0	0	0	0	0	0			0
351	WBGene00000461	4.428	4.026	3.515	4.098	3.849	3.503	3.139	3.946	4	4	4.01675	3.60925	0.377521	0.366654	1.38706	1.27951	0.0960308	0.103938	0.33914	0.34061	0.0851975	0.0952936	-1.69559	24	1.00869	-1.68283	24	1.25105	0.102899	0.105373	-1.1129	0.129644	0	0	0	0	0	0	0			0
352	WBGene00000462	2.545	2.306	2.376	2.834	1.986	2.06	2.322	2.386	4	4	2.51525	2.1885	0.234991	0.195232	0.919188	0.780219	0.09151	0.0894878	0.29291	0.262353	0.123396	0.126268	-1.6619	24	1.24651	-1.57427	24	1.0471	0.109541	0.128518	-1.1493	0.134837	0	0	0	0	0	0	0			0
353	WBGene00000463	3.766	4.021	3.198	3.266	3.491	3.634	2.377	2.591	4	4	3.56275	3.02325	0.396824	0.631476	1.26591	1.0896	0.110848	0.21219	0.360161	0.44767	0.100077	0.147516	-1.87794	24	1.54497	-1.9781	24	2.17275	0.0725927	0.0595069	-1.17845	0.10356	0	0	0	0	0	0	0			0
354	WBGene00000464	3.59044	3.75619	3.46026	3.68747	3.04705	3.52558	3.1973	3.53758	4	4	3.62359	3.32688	0.128374	0.244247	1.28699	1.19999	0.035627	0.0739755	0.299192	0.33249	0.0802296	0.0972827	-1.32673	24	1.23498	-1.37987	24	1.47029	0.197083	0.180347	-1.08919	0.195786	0	0	0	0	0	0	0			0
355	WBGene00000465	5.794	5.87	5.85053	5.85687	6.0192	5.7786	5.83453	5.93533	4	4	5.84285	5.89192	0.0335606	0.106801	1.76521	1.77346	0.00575757	0.0181068	0.113048	0.178261	0.0194736	0.0297556	0.4649	24	2.48647	0.4641	24	2.33476	0.646193	0.646758	1.0084	0.394283	0	0	0	0	0	0	0			0
356	WBGene00000466	5.34571	5.05029	5.18043	5.19857	4.86843	4.72743	4.65529	4.856	4	4	5.19375	4.77679	0.120935	0.103072	1.64725	1.56359	0.0232638	0.0216272	0.165714	0.218921	0.0321911	0.0452494	-3.03724	24	1.74525	-3.01306	24	1.97585	0.00567924	0.006016	-1.08729	0.0178303	0	0	0	0	0	0	0			0
357	WBGene00000467	3.72487	3.31725	3.73738	3.89387	3.0545	2.81487	3.16425	3.36975	4	4	3.66834	3.10084	0.246368	0.231125	1.29799	1.12957	0.0689208	0.0750487	0.316368	0.319617	0.0761137	0.100093	-2.52382	24	1.02064	-2.6787	24	1.72936	0.0186373	0.0131317	-1.18301	0.0408292	0	0	0	0	0	0	0			0
358	WBGene00000468	2.104	2.863	2.314	2.406	1.885	2.456	1.86	2.116	4	4	2.42175	2.07925	0.320169	0.276342	0.878163	0.725641	0.128779	0.128986	0.339442	0.291191	0.132793	0.133315	-1.53166	24	1.35886	-1.62113	24	1.00787	0.138684	0.118056	-1.16472	0.15631	0	0	0	0	0	0	0			0
359	WBGene00000469	3.304	3.692	2.395	2.819	2.372	2.244	2.135	2.481	4	4	3.0525	2.308	0.565403	0.15061	1.10277	0.83478	0.188792	0.0653806	0.419928	0.269696	0.142869	0.113052	-2.98352	24	2.42438	-2.94188	24	1.59705	0.00645329	0.00712171	-1.32257	0.0195644	0	0	1	0	0	0	0			0
360	WBGene00000472	5.654	5.862	5.426	5.534	5.757	5.967	5.674	5.911	4	4	5.619	5.82725	0.186858	0.135357	1.72574	1.76234	0.0330871	0.0232557	0.156381	0.201649	0.0280036	0.0345018	1.63217	24	1.66275	1.64734	24	1.51795	0.115696	0.112521	1.03706	0.139814	0	0	1	1	0	0	0			0
361	WBGene00000473	6.085	6.09	6.135	5.996	6.104	5.419	5.841	5.821	4	4	6.0765	5.79625	0.0581865	0.282632	1.80439	1.75631	0.00960087	0.0492599	0.10277	0.235126	0.0168728	0.0400895	-2.18429	24	5.2344	-2.21112	24	5.64532	0.0389437	0.0368024	-1.04835	0.0681406	0	0	0	0	0	0	0			0
362	WBGene00000474	5.839	5.776	5.88	5.784	5.992	4.936	5.448	5.511	4	4	5.81975	5.47175	0.0489651	0.431969	1.76123	1.69724	0.00840416	0.0794045	0.118875	0.317151	0.0201997	0.0579839	-2.05493	24	7.11786	-2.08421	24	8.23993	0.0509259	0.0479575	-1.0636	0.081468	0	0	0	0	0	0	0			0
363	WBGene00000475	5.649	5.746	5.672	5.27	5.914	5.609	5.536	5.881	4	4	5.58425	5.735	0.213548	0.190468	1.71939	1.74617	0.038922	0.0332496	0.163647	0.219083	0.0295171	0.0371851	1.10256	24	1.79226	1.12835	24	1.58705	0.281153	0.270327	1.027	0.244207	0	1	0	1	0	0	0			0
364	WBGene00000476	2.31267	3.11233	2.642	2.54867	3.534	3.82167	3.684	3.681	4	4	2.65392	3.68017	0.335568	0.117477	0.97022	1.30258	0.123631	0.0319713	0.349165	0.282157	0.131553	0.0818034	4.57208	24	1.53136	4.29086	24	2.58619	0.00012329	0.00025209	1.38669	0.00123035	1	0	0	0	0	0	0		188793	0
365	WBGene00000477	2.28797	2.31958	2.22926	2.07605	2.23095	2.16992	2.07263	2.05837	4	4	2.22822	2.13297	0.108125	0.0819981	0.800298	0.756962	0.0493805	0.0383046	0.281625	0.285175	0.126898	0.133339	-0.475304	24	1.02537	-0.470853	24	1.10409	0.638868	0.641997	-1.04466	0.391724	0	0	0	0	0	0	0			0
366	WBGene00000478	3.383	3.69179	2.469	2.76679	3.12579	3.54029	2.57064	3.0335	4	4	3.07764	3.06755	0.559015	0.397889	1.11159	1.11444	0.183769	0.131766	0.418563	0.383643	0.140288	0.115858	-0.0355393	24	1.19033	0.0313105	24	1.4662	0.971944	0.975281	-1.00329	0.488821	0	0	0	0	0	0	0			0
367	WBGene00000479	5.8856	5.737	5.7624	5.832	5.9366	5.6946	5.802	6.051	4	4	5.80425	5.87105	0.067483	0.155543	1.75854	1.76977	0.0116137	0.0264927	0.123178	0.192538	0.0211991	0.0326977	0.584505	24	2.44325	0.57639	24	2.37904	0.564335	0.569719	1.01151	0.365851	0	0	0	0	0	0	0			0
368	WBGene00000480	4.24329	3.90453	3.945	3.96812	3.61606	3.41647	3.51724	3.73718	4	4	4.01524	3.57174	0.154294	0.137129	1.38955	1.2725	0.0377852	0.0383524	0.276227	0.31213	0.0657431	0.0903143	-2.12809	24	1.27685	-2.09572	24	1.88718	0.0437971	0.0468337	-1.12417	0.0735617	0	0	0	0	0	0	0			0
369	WBGene00000481	2.01529	2.32857	1.92514	1.72143	2.09129	2.41164	1.68964	1.681	4	4	1.99761	1.96839	0.25257	0.352075	0.686043	0.665498	0.125094	0.175681	0.259557	0.312347	0.138543	0.154195	-0.143871	24	1.44814	-0.198216	24	1.23872	0.886803	0.844546	-1.01484	0.465813	0	0	0	0	0	0	0			0
370	WBGene00000482	4.06775	4.09765	3.37374	3.51909	3.98154	4.23735	3.90703	4.01839	4	4	3.76456	4.03608	0.372323	0.14195	1.32193	1.39482	0.0994892	0.0347738	0.351316	0.286813	0.0909561	0.0713685	1.19738	24	1.50037	1.26084	24	1.62424	0.24285	0.219488	1.07213	0.223183	0	0	0	0	0	0	0			0
371	WBGene00000483	3.414	3.146	3.525	3.694	3.122	2.738	3.341	3.406	4	4	3.44475	3.15175	0.230045	0.301404	1.23515	1.14438	0.0676004	0.0987636	0.320016	0.32335	0.0980195	0.10663	-1.2881	24	1.02094	-1.25347	24	1.1834	0.209994	0.222109	-1.09296	0.203448	0	0	0	0	0	0	0			0
372	WBGene00000484	1.85207	2.70414	1.85407	1.77786	1.54993	2.19843	1.49929	1.69029	4	4	2.04704	1.73448	0.439505	0.319675	0.700971	0.53896	0.196848	0.173388	0.333384	0.280288	0.154436	0.148642	-1.4352	24	1.41476	-1.51167	24	1.07948	0.164134	0.143675	-1.1802	0.173995	0	0	0	0	0	0	0			0
373	WBGene00000485	2.27359	2.56563	2.28113	2.27933	2.27385	2.46277	2.08723	2.21666	4	4	2.34992	2.26013	0.143841	0.15603	0.853028	0.81365	0.0594663	0.0685754	0.335157	0.279598	0.126441	0.124068	-0.411446	24	1.43691	-0.444594	24	1.03861	0.684397	0.660597	-1.03973	0.406953	0	0	0	0	0	0	0			0
374	WBGene00000490	1.91424	2.37204	1.81253	1.81902	1.8881	2.13729	1.65169	1.80296	4	4	1.97946	1.87001	0.265819	0.203248	0.676522	0.621584	0.127285	0.10741	0.298077	0.267655	0.146186	0.134157	-0.546396	24	1.24024	-0.553768	24	1.18737	0.589838	0.584861	-1.05853	0.374977	0	0	0	0	0	0	0			0
375	WBGene00000491	1.99069	2.49392	2.06533	1.99646	2.03754	2.4411	1.96003	1.96049	4	4	2.1366	2.09979	0.240615	0.230441	0.754752	0.737586	0.107379	0.10484	0.286536	0.278275	0.136209	0.138805	-0.184335	24	1.06025	-0.176541	24	1.03847	0.855299	0.86135	-1.01753	0.456772	0	0	0	0	0	0	0			0
376	WBGene00000492	2.008	2.605	2.636	2.377	2.098	2.017	2.308	1.826	4	4	2.4065	2.06225	0.289681	0.19961	0.872418	0.720276	0.125661	0.0969822	0.327843	0.270365	0.129987	0.134792	-1.62021	24	1.47039	-1.62495	24	1.0753	0.118254	0.117235	-1.16693	0.141476	0	0	0	0	0	0	0			0
377	WBGene00000493	2.66095	3.19521	2.70721	2.56753	2.52826	2.71574	2.333	2.47574	4	4	2.78272	2.51318	0.281062	0.158244	1.0198	0.920072	0.0971086	0.0627039	0.336431	0.298053	0.124143	0.118597	-1.19937	24	1.2741	-1.16173	24	1.09571	0.242091	0.25677	-1.10725	0.222802	0	0	0	0	0	0	0			0
378	WBGene00000496	5.43802	5.16718	5.23772	5.3784	4.63177	4.22972	4.6937	5.03618	4	4	5.30533	4.64784	0.124638	0.330651	1.6685	1.53449	0.0235081	0.0716918	0.170835	0.293028	0.0307757	0.0622554	-3.8768	24	2.94212	-3.8596	24	4.09203	0.000718926	0.000750734	-1.14146	0.00421923	0	0	0	0	0	0	0			0
379	WBGene00000497	2.94889	3.2679	2.81504	2.68766	2.61306	3.14086	2.50919	2.50836	4	4	2.92987	2.69286	0.249318	0.302681	1.07231	0.986151	0.0836265	0.107295	0.339172	0.327878	0.121897	0.11431	-1.00481	24	1.07008	-1.03112	24	1.13715	0.32501	0.312764	-1.08801	0.265458	0	0	0	0	0	0	0			0
380	WBGene00000498	4.03178	3.68056	4.04033	4.04556	3.17156	2.82756	3.51289	3.71767	4	4	3.94956	3.30742	0.179423	0.391258	1.3728	1.19079	0.046515	0.120445	0.284308	0.375457	0.0823701	0.102961	-2.72696	24	1.74398	-2.76078	24	1.56246	0.0117557	0.0108738	-1.19415	0.0297265	0	0	0	0	0	0	0			0
381	WBGene00000499	5.307	5.119	5.222	5.265	4.051	3.742	4.148	4.636	4	4	5.22825	4.14425	0.0806779	0.370735	1.65399	1.41877	0.015491	0.0884716	0.176339	0.324374	0.03315	0.0780975	-5.87204	24	3.38373	-5.54493	24	5.55017	4.67e-06	1.05e-05	-1.26157	0.000115447	0	0	0	0	0	0	0	expressed in other tissue		0
382	WBGene00000500	4.529	4.487	4.423	4.621	3.765	3.612	3.971	4.221	4	4	4.515	3.89225	0.0830261	0.263951	1.50728	1.35727	0.0183536	0.0674612	0.194632	0.304749	0.0437942	0.0801832	-3.44442	24	2.45164	-3.28367	24	3.35223	0.00211339	0.00313424	-1.16	0.00889867	0	0	0	0	0	0	0			0
383	WBGene00000501	2.09222	2.49078	2.34044	2.01578	1.92478	2.33378	1.85378	1.90656	4	4	2.23481	2.00472	0.219837	0.221427	0.800542	0.691206	0.0980248	0.105403	0.281892	0.282447	0.134572	0.15371	-1.15316	24	1.00394	-1.07038	24	1.30465	0.2602	0.295097	-1.11477	0.232885	0	0	0	0	0	0	0			0
384	WBGene00000502	5.644	5.387	5.657	5.799	4.465	4.399	4.892	4.961	4	4	5.62175	4.67925	0.171525	0.288149	1.72629	1.54171	0.0307528	0.0616404	0.153607	0.285518	0.0273825	0.0583463	-5.81403	24	3.45496	-5.72754	24	4.54027	5.39e-06	6.68e-06	-1.20142	0.00012914	0	0	0	0	0	0	0	not annotated		0
385	WBGene00000503	4.414	4.36782	3.01506	3.52682	3.65176	3.61088	2.84988	3.43718	4	4	3.83093	3.38743	0.679792	0.370241	1.33077	1.21527	0.183358	0.115043	0.422839	0.373853	0.123048	0.107575	-1.57155	24	1.27923	-1.41326	24	1.30834	0.129146	0.170418	-1.13093	0.149511	0	0	0	1	0	0	0			0
386	WBGene00000506	4.544	4.497	4.565	4.785	4.504	4.269	4.232	4.546	4	4	4.59775	4.38775	0.12803	0.160122	1.52528	1.47832	0.0275287	0.036502	0.188534	0.288364	0.0404872	0.0631204	-1.21906	24	2.33938	-1.25254	24	2.43054	0.234667	0.22244	-1.04786	0.218372	0	0	0	0	0	0	0			0
387	WBGene00000507	4.564	4.284	4.556	4.592	3.256	3.661	3.883	4.056	4	4	4.499	3.714	0.144162	0.345494	1.50346	1.30876	0.0325584	0.0952584	0.19793	0.382759	0.0425928	0.0994197	-3.64348	24	3.73961	-3.60028	24	5.44845	0.00129008	0.00143662	-1.21136	0.00631175	0	0	0	0	0	0	0			0
388	WBGene00000508	4.6766	4.5027	4.4714	4.6053	4.3913	4.0385	3.9923	4.202	4	4	4.564	4.15602	0.0943697	0.180819	1.51804	1.42386	0.0206402	0.0431647	0.205588	0.303424	0.0426568	0.0663156	-2.22625	24	2.17823	-2.3889	24	2.41688	0.0356428	0.0251121	-1.09816	0.0637729	0	0	0	1	0	0	0			0
389	WBGene00000509	5.157	5.008	5.137	5.26	4.996	4.203	4.596	4.626	4	4	5.1405	4.60525	0.103475	0.324041	1.637	1.52533	0.0201716	0.0707025	0.16545	0.287442	0.0340905	0.0631192	-3.22773	24	3.01831	-3.1133	24	3.42812	0.00359103	0.00473397	-1.11623	0.0130393	0	1	0	0	0	0	0			0
390	WBGene00000510	2.571	2.736	2.513	2.603	3.631	3.482	3.115	3.261	4	4	2.60575	3.37225	0.0944859	0.229166	0.957233	1.21384	0.0359311	0.0680709	0.293371	0.328067	0.119489	0.0887237	3.48324	24	1.25052	3.44844	24	1.81375	0.00192031	0.00209257	1.29416	0.00833452	1	0	1	0	0	0	0		180703	0
391	WBGene00000511	2.671	3.541	3.444	3.593	2.724	2.858	3.509	3.386	4	4	3.31225	3.11925	0.431936	0.386236	1.19062	1.1318	0.139886	0.124459	0.381495	0.351624	0.122365	0.113405	-0.74399	24	1.17712	-0.705127	24	1.16427	0.464105	0.487519	-1.06187	0.326719	0	0	0	0	0	0	0			0
392	WBGene00000512	3.118	2.893	3.643	3.785	2.853	2.494	3.346	3.286	4	4	3.35975	2.99475	0.423228	0.399603	1.20583	1.08992	0.127224	0.137297	0.379477	0.384534	0.107995	0.122146	-1.35123	24	1.02683	-1.42186	24	1.27923	0.189223	0.167933	-1.12188	0.190723	0	0	1	0	0	0	0			0
393	WBGene00000513	2.681	2.397	2.83	2.233	2.456	2.272	2.401	2.351	4	4	2.53525	2.37	0.269931	0.0781494	0.926008	0.86248	0.107094	0.0331	0.29242	0.275815	0.12255	0.116261	-0.822191	24	1.12403	-0.752146	24	1.11113	0.419062	0.459277	-1.06973	0.307761	0	0	0	0	0	0	0			0
394	WBGene00000514	3.248	3.551	3.78	4.102	2.987	3.172	3.725	3.751	4	4	3.67025	3.40875	0.361003	0.38776	1.29662	1.22143	0.098679	0.114825	0.338642	0.374331	0.0843614	0.108384	-1.0361	24	1.22188	-1.09485	24	1.65061	0.310485	0.28445	-1.07671	0.258908	0	0	0	1	0	0	0			0
395	WBGene00000515	3.329	3.556	3.875	3.737	3.071	3.015	3.376	3.561	4	4	3.62425	3.25575	0.236233	0.258025	1.28603	1.17808	0.065792	0.078824	0.313845	0.307968	0.085663	0.0964834	-1.67611	24	1.03853	-1.67334	24	1.26858	0.106696	0.107247	-1.11318	0.132614	0	0	0	0	0	0	0			0
396	WBGene00000516	3.876	4.385	3.298	3.348	3.407	3.666	2.918	3.066	4	4	3.72675	3.26425	0.510832	0.337131	1.30867	1.17905	0.134453	0.10286	0.38471	0.3277	0.104133	0.106818	-1.83038	24	1.3782	-1.73775	24	1.05224	0.0796408	0.0950716	-1.14169	0.109894	0	0	1	0	0	0	0			0
397	WBGene00000517	4.574	4.122	4.206	4.357	3.737	3.558	3.784	4.196	4	4	4.31475	3.81875	0.198305	0.26969	1.46126	1.3381	0.0455971	0.0693199	0.251629	0.286071	0.051327	0.0806353	-2.60374	24	1.29249	-2.57691	24	2.46808	0.0155722	0.0165446	-1.12989	0.0361594	0	0	0	0	0	0	0			0
398	WBGene00000518	3.33783	3.32133	3.5705	3.12533	4.30533	4.45933	4.0245	4.11767	4	4	3.33875	4.22671	0.182171	0.194143	1.20448	1.44064	0.0544348	0.0458038	0.334023	0.267559	0.0927495	0.0672389	4.14962	24	1.55852	4.12283	24	1.90275	0.000360789	0.000386135	1.26596	0.00260733	1	0	1	0	0	0	0		182278	0
399	WBGene00000519	4.24379	4.01136	4.12964	4.20279	3.635	3.4335	3.63936	3.84707	4	4	4.14689	3.63873	0.101947	0.168859	1.42213	1.29083	0.0247256	0.0464356	0.261509	0.327082	0.063123	0.0906066	-2.42691	24	1.56437	-2.37812	24	2.06037	0.0231043	0.0257104	-1.13965	0.0472088	0	0	0	0	0	0	0			0
400	WBGene00000520	4.31214	4.06493	4.06714	4.2005	3.18207	2.81036	3.15464	3.516	4	4	4.16118	3.16577	0.118944	0.288311	1.42549	1.14926	0.0284499	0.0916341	0.281026	0.338146	0.0557319	0.106	-4.52789	24	1.44782	-4.61317	24	3.61748	0.000137963	0.000111054	-1.31443	0.00133185	0	0	0	0	0	0	0			0
401	WBGene00000521	2.07918	2.30582	1.54235	1.721	2.07712	1.901	1.52253	1.75129	4	4	1.91209	1.81299	0.34456	0.235006	0.635906	0.588522	0.181417	0.131988	0.284081	0.256016	0.150784	0.146546	-0.518291	24	1.23126	-0.450704	24	1.05868	0.609001	0.656248	-1.05466	0.381625	0	0	0	0	0	0	0			0
402	WBGene00000522	4.604	3.834	4.002	3.607	3.877	2.472	3.297	3.121	4	4	4.01175	3.19175	0.426721	0.578415	1.38513	1.14781	0.103704	0.18622	0.339833	0.421152	0.0938503	0.131895	-3.03052	24	1.53584	-2.932	24	1.9751	0.00577101	0.00728968	-1.25691	0.0180396	0	0	0	0	0	0	0			0
403	WBGene00000523	3.841	4.077	3.752	3.703	3.278	3.444	2.947	3.081	4	4	3.84325	3.1875	0.165973	0.218453	1.34563	1.15748	0.0425986	0.0684854	0.280886	0.318747	0.0738568	0.110896	-3.08698	24	1.28775	-2.8243	24	2.25452	0.00504257	0.00938358	-1.20573	0.0164368	0	0	0	0	0	0	0			0
404	WBGene00000524	3.334	4.031	3.728	3.862	4.912	3.965	3.489	3.371	4	4	3.73875	3.93425	0.29695	0.70058	1.31631	1.3585	0.0813003	0.170414	0.319773	0.462937	0.0807074	0.113403	0.694937	24	2.09585	0.606249	24	1.97432	0.493769	0.550042	1.05229	0.339152	0	0	0	0	0	0	0			0
405	WBGene00000526	3.961	4.623	3.889	3.79	3.799	3.834	3.543	3.586	4	4	4.06575	3.6905	0.378056	0.147242	1.39951	1.30516	0.089535	0.0399254	0.32833	0.298157	0.0806885	0.0855312	-1.6922	24	1.21264	-1.6048	24	1.12364	0.103554	0.121618	-1.10168	0.130106	0	0	0	0	0	0	0			0
406	WBGene00000527	3.20116	3.66205	3.36332	3.17368	3.61582	3.90297	3.42492	3.36153	4	4	3.35005	3.57631	0.224199	0.243119	1.20734	1.27263	0.0656412	0.0669729	0.322625	0.317343	0.095089	0.0920699	0.999939	24	1.03357	0.986612	24	1.06666	0.327316	0.333676	1.06754	0.266687	0	0	0	0	0	0	0			0
407	WBGene00000528	4.59179	4.73238	4.47096	4.24258	4.57233	4.35708	4.27363	4.22225	4	4	4.50943	4.35632	0.207505	0.154354	1.50537	1.47116	0.0463606	0.0350514	0.212521	0.269638	0.0471722	0.0645669	-0.891898	24	1.60975	-0.855492	24	1.87347	0.381303	0.400739	-1.03515	0.291621	0	1	1	0	0	0	0			0
408	WBGene00000529	2.45447	2.85911	2.57326	2.40205	3.20763	3.45037	2.96253	2.98074	4	4	2.57222	3.15032	0.204226	0.229011	0.94248	1.14556	0.0775466	0.0717078	0.302976	0.314642	0.115108	0.104727	2.64694	24	1.07849	2.60991	24	1.20806	0.0141182	0.0153564	1.22474	0.0336772	0	1	0	0	0	0	0			0
409	WBGene00000530	4.05016	3.85366	3.86269	4.06181	3.16431	2.87384	3.16972	3.32975	4	4	3.95708	3.13441	0.114366	0.189906	1.37519	1.14103	0.0289069	0.0616313	0.26946	0.301303	0.0737706	0.0949371	-4.07044	24	1.25032	-3.89523	24	1.65617	0.000440929	0.00068633	-1.26246	0.00299687	0	0	0	0	0	0	0			0
410	WBGene00000531	2.3057	2.54796	2.14774	1.87774	1.94504	2.06104	1.721	1.676	4	4	2.21979	1.85077	0.281228	0.183015	0.791291	0.611951	0.128317	0.0985188	0.290323	0.254563	0.135008	0.129405	-1.91141	24	1.30069	-1.91797	24	1.08847	0.0679652	0.0670886	-1.19939	0.0988392	0	0	0	0	0	0	0			0
411	WBGene00000532	4.60183	4.29696	4.28626	4.48461	3.55404	3.43735	3.59548	3.76687	4	4	4.41741	3.58843	0.153008	0.136502	1.48511	1.27718	0.0345089	0.0378628	0.214101	0.324029	0.0451397	0.0835783	-4.26897	24	2.29051	-4.37797	24	3.42823	0.000266502	0.000202016	-1.23101	0.00209763	0	0	0	0	0	0	0			0
412	WBGene00000533	4.34526	4.11713	4.00691	4.1143	3.19635	3.23091	3.25609	3.461	4	4	4.1459	3.28609	0.142464	0.119152	1.42168	1.18921	0.0340332	0.0357119	0.271567	0.308197	0.0646712	0.0876681	-4.18634	24	1.28796	-4.26781	24	1.83765	0.000328706	0.00026729	-1.26165	0.00244255	0	0	0	0	0	0	0			0
413	WBGene00000534	5.679	5.61	5.601	5.419	5.903	5.734	5.556	5.646	4	4	5.57725	5.70975	0.111105	0.147915	1.71855	1.74192	0.0200637	0.0257993	0.137659	0.210954	0.0244832	0.037283	1.05202	24	2.34835	1.04832	24	2.31892	0.303267	0.304932	1.02376	0.255507	0	0	0	0	0	0	0			0
414	WBGene00000535	4.946	5.604	5.482	5.621	6.076	5.457	5.517	5.731	4	4	5.41325	5.69525	0.317592	0.279753	1.68751	1.73874	0.0603281	0.0485152	0.220482	0.255196	0.0414356	0.044816	1.67235	24	1.33968	1.67877	24	1.16982	0.107443	0.106172	1.05209	0.133117	0	0	1	0	0	0	0			0
415	WBGene00000536	4.604	4.669	4.773	5.087	4.135	4.057	4.296	4.601	4	4	4.78325	4.27225	0.214128	0.240701	1.56438	1.45097	0.0441072	0.0555571	0.219127	0.283606	0.0449439	0.0660611	-2.85158	24	1.67509	-2.83882	24	2.16048	0.00880483	0.00907106	-1.11961	0.0243054	0	1	0	1	0	0	0			0
416	WBGene00000537	4.47628	4.18431	4.46062	4.54517	3.48097	3.41055	3.83452	4.11169	4	4	4.41659	3.70943	0.159152	0.32608	1.48487	1.30802	0.0366059	0.0871105	0.209602	0.37174	0.0468073	0.0974979	-3.31411	24	3.14548	-3.27053	24	4.33874	0.00290993	0.00323624	-1.19064	0.011168	0	0	0	0	0	0	0			0
417	WBGene00000539	2.817	2.918	3.515	3.333	2.103	2.082	2.824	3.151	4	4	3.14575	2.54	0.332343	0.533763	1.14187	0.915642	0.105551	0.209592	0.346112	0.417379	0.111663	0.16169	-2.23435	24	1.45421	-2.30258	24	2.09675	0.0350355	0.0302808	-1.23848	0.0630234	0	0	0	0	0	1	0			0
418	WBGene00000540	4.73	4.33	4.91	4.842	4.398	4.068	4.621	4.681	4	4	4.703	4.442	0.259505	0.277473	1.54702	1.48961	0.0564481	0.0635954	0.209154	0.271388	0.0448594	0.0665729	-1.5235	24	1.68364	-1.43049	24	2.20236	0.140703	0.165467	-1.05876	0.157624	0	0	0	0	0	0	0			0
419	WBGene00000541	2.591	3.262	3.52	2.915	2.226	2.185	2.805	2.871	4	4	3.072	2.52175	0.405304	0.366549	1.11568	0.916972	0.133798	0.146069	0.388516	0.349269	0.121928	0.144601	-2.1065	24	1.23736	-2.1011	24	1.40648	0.0458022	0.0463157	-1.2182	0.0758404	0	0	0	0	0	0	0			0
420	WBGene00000542	4.63193	4.67186	4.69114	4.62	5.24614	5.11779	5.08671	4.926	4	4	4.65373	5.09416	0.0333733	0.131644	1.53765	1.62784	0.00716922	0.0259123	0.184034	0.261145	0.0360231	0.0487417	2.75719	24	2.01358	2.97625	24	1.8308	0.0109643	0.00656553	1.09464	0.0284463	0	0	0	0	0	0	0			0
421	WBGene00000543	4.1191	3.8041	4.22314	4.25895	3.39348	3.18429	3.6019	3.76481	4	4	4.10132	3.48612	0.206839	0.252164	1.41033	1.24681	0.05149	0.0727863	0.299266	0.298255	0.0670204	0.0880175	-2.91212	24	1.00679	-2.95615	24	1.72474	0.00763924	0.0068856	-1.17647	0.022031	0	0	1	0	0	0	0			0
422	WBGene00000544	2.13947	2.26142	2.18637	1.96879	1.83874	1.86558	1.90353	1.92574	4	4	2.13901	1.88339	0.1241	0.0387723	0.759054	0.632917	0.0590094	0.0206029	0.260301	0.228554	0.132308	0.118131	-1.47585	24	1.29711	-1.4223	24	1.25441	0.152984	0.167808	-1.13572	0.166528	0	0	0	0	0	0	0			0
423	WBGene00000545	3.40472	3.61089	3.44933	3.36206	4.45861	4.20522	3.79428	3.67183	4	4	3.45675	4.03249	0.108762	0.364341	1.23996	1.39134	0.0311381	0.089998	0.287928	0.339248	0.0832501	0.0807717	2.5878	24	1.38824	2.61004	24	1.06231	0.0161433	0.0153518	1.16655	0.0370747	0	0	1	0	0	0	0			0
424	WBGene00000546	2.374	2.70176	2.62996	2.3062	1.82052	1.91004	2.05216	1.9672	4	4	2.50298	1.93748	0.19235	0.0974121	0.915262	0.660438	0.0769696	0.0503833	0.277161	0.238535	0.112379	0.126344	-3.09292	24	1.35008	-3.01405	24	1.26396	0.00497123	0.0060018	-1.29187	0.0162993	0	0	0	0	0	0	0			0
425	WBGene00000547	4.43264	4.35812	4.20328	4.30892	3.9254	4.15184	4.01296	4.1864	4	4	4.32574	4.06915	0.0961863	0.121664	1.4644	1.4031	0.022296	0.0299895	0.239461	0.260811	0.0479025	0.0610663	-1.44939	24	1.18626	-1.57963	24	1.62513	0.160172	0.127283	-1.06306	0.171312	0	0	0	0	0	0	0			0
426	WBGene00000548	4.73762	4.58574	4.61768	4.66172	4.30974	4.256	4.27082	4.4371	4	4	4.65069	4.31841	0.0657942	0.0823049	1.53694	1.46275	0.0141078	0.0189195	0.167995	0.272099	0.0374509	0.0622517	-2.07814	24	2.62339	-2.04235	24	2.76299	0.0485599	0.0522509	-1.07694	0.0789384	0	0	1	0	0	0	0			0
427	WBGene00000549	4.26459	4.10533	4.38318	4.66536	3.88603	3.73526	4.07454	4.46421	4	4	4.35462	4.04001	0.236378	0.315024	1.47014	1.39401	0.0538533	0.0767741	0.222771	0.319415	0.0547161	0.0805473	-1.61576	24	2.05587	-1.56366	24	2.16706	0.119218	0.130989	-1.07787	0.142164	0	0	1	0	0	0	0			0
428	WBGene00000550	4.99117	4.63437	4.85944	4.91148	4.412	4.46104	4.6647	4.82257	4	4	4.84912	4.59008	0.153069	0.189725	1.57842	1.52326	0.0318991	0.041145	0.200575	0.270285	0.0401605	0.0539962	-1.53924	24	1.81589	-1.63929	24	1.80771	0.136827	0.114197	-1.05643	0.154996	0	0	1	0	0	0	0			0
429	WBGene00000551	1.84694	1.89282	1.663	1.51406	2.06512	1.93935	1.559	1.63659	4	4	1.72921	1.80001	0.174455	0.241171	0.543754	0.58105	0.102679	0.134136	0.227079	0.269515	0.131841	0.151527	0.401838	24	1.40867	0.371369	24	1.32092	0.691359	0.713621	1.04095	0.408824	0	0	0	0	0	0	0			0
430	WBGene00000552	4.825	5.144	4.991	4.919	5.517	5.131	5.182	5.121	4	4	4.96975	5.23775	0.134589	0.188073	1.6031	1.65542	0.026985	0.035326	0.167244	0.236145	0.0359992	0.0428617	1.8523	24	1.99368	1.86956	24	1.4176	0.0763224	0.0737948	1.05393	0.107113	0	0	0	1	0	0	0			0
431	WBGene00000553	1.712	2.645	1.983	1.858	1.919	2.814	2.214	2.046	4	4	2.0495	2.24825	0.412157	0.396046	0.703611	0.799275	0.189181	0.167434	0.321173	0.323221	0.158831	0.138719	0.872366	24	1.01279	0.90728	24	1.31099	0.391653	0.373279	1.09697	0.295706	0	0	1	1	0	0	0			0
432	WBGene00000554	4.433	4.962	4.958	4.77	5.327	5.571	5.423	5.131	4	4	4.78075	5.363	0.248539	0.184376	1.56356	1.67908	0.0529596	0.0345056	0.226664	0.250486	0.0457942	0.0482738	3.44714	24	1.22124	3.47222	24	1.11122	0.00209927	0.00197329	1.12179	0.00885372	1	1	1	0	0	0	0		179572	0
433	WBGene00000555	3.359	3.439	3.047	2.56	3.541	3.042	3.243	3.301	4	4	3.10125	3.28175	0.398499	0.205396	1.12525	1.18691	0.134147	0.062457	0.40742	0.329169	0.123573	0.097231	0.689223	24	1.53195	0.784345	24	1.61525	0.497293	0.440511	1.0582	0.340457	0	0	0	0	0	0	0			0
434	WBGene00000556	4.875	3.308	4.002	3.968	4.582	2.684	3.838	3.856	4	4	4.03825	3.74	0.642823	0.784678	1.38638	1.30101	0.15841	0.224796	0.432985	0.497992	0.10807	0.138784	-0.90392	24	1.32282	-0.970714	24	1.64918	0.375022	0.341373	-1.07975	0.288886	0	0	1	0	0	0	0			0
435	WBGene00000557	2.827	2.62	2.915	2.445	3.144	1.919	2.613	2.331	4	4	2.70175	2.50175	0.211161	0.514333	0.991576	0.901024	0.0789904	0.206889	0.317309	0.383612	0.111771	0.160248	-0.803473	24	1.46157	-0.926947	24	2.05555	0.429588	0.363182	-1.07994	0.312457	0	0	1	0	0	0	0			0
436	WBGene00000558	4.368	3.976	3.511	3.228	4.191	3.346	3.198	3.566	4	4	3.77075	3.57525	0.503615	0.437457	1.32059	1.26867	0.133536	0.118277	0.389765	0.370137	0.0991438	0.103909	-0.727426	24	1.10887	-0.722988	24	1.09843	0.474002	0.476675	-1.05468	0.331206	0	0	1	0	0	0	0			0
437	WBGene00000559	2.073	1.624	1.633	1.272	1.65	1.268	1.481	1.886	4	4	1.6505	1.57125	0.328013	0.261645	0.486225	0.441348	0.199411	0.168093	0.253603	0.260701	0.171141	0.166779	-0.435795	24	1.05676	-0.375591	24	1.053	0.66688	0.71052	-1.05044	0.401321	0	0	0	0	0	0	0			0
438	WBGene00000560	2.219	2.038	1.714	2.171	2.674	2.185	1.963	2.171	4	4	2.0355	2.24825	0.227597	0.30144	0.705761	0.803713	0.116989	0.129557	0.251815	0.296606	0.139612	0.126908	1.0936	24	1.38739	1.03834	24	1.21022	0.284987	0.309462	1.10452	0.246113	0	0	0	0	0	0	0			0
439	WBGene00000561	2.746	2.64	2.418	2.252	2.064	2.451	2.194	2.231	4	4	2.514	2.235	0.221781	0.160825	0.918921	0.80233	0.0890255	0.0711285	0.283587	0.26337	0.120582	0.119601	-1.44178	24	1.15942	-1.37298	24	1.01647	0.162286	0.182452	-1.12483	0.172702	0	0	0	0	0	0	0			0
440	WBGene00000562	2.63579	2.29757	2.33536	2.31214	2.31693	2.21179	2.42821	2.44993	4	4	2.39521	2.35171	0.161134	0.109982	0.871843	0.854314	0.0652385	0.0471917	0.289266	0.271508	0.114947	0.117357	-0.219295	24	1.13509	-0.213414	24	1.04237	0.828274	0.832807	-1.0185	0.449693	0	0	0	0	0	0	0			0
441	WBGene00000563	2.29657	2.22686	2.125	2.12557	2.09843	2.06157	2.14743	2.18814	4	4	2.1935	2.12389	0.0837515	0.0554208	0.784955	0.752995	0.037997	0.0260886	0.267631	0.26482	0.120181	0.118814	-0.369754	24	1.02134	-0.378229	24	1.02314	0.714809	0.708585	-1.03277	0.416036	0	0	0	0	0	0	0			0
442	WBGene00000564	4.87414	4.78381	4.65243	4.79814	3.90538	3.962	4.14233	4.30457	4	4	4.77713	4.07857	0.0921016	0.181407	1.5637	1.40501	0.0193645	0.0442368	0.188643	0.276931	0.0395892	0.0661642	-4.16955	24	2.15507	-4.11626	24	2.79315	0.000343008	0.000392622	-1.17128	0.00252035	0	0	0	0	0	0	0			0
443	WBGene00000565	3.49909	3.43674	3.41853	3.52594	3.52635	3.42506	3.50738	3.64821	4	4	3.47007	3.52675	0.0507651	0.0921374	1.2441	1.26012	0.0146237	0.026029	0.285685	0.296756	0.0877323	0.0880953	0.27518	24	1.07901	0.257808	24	1.00829	0.785533	0.798753	1.01633	0.438173	0	0	0	0	0	0	0			0
444	WBGene00000566	3.91862	3.89711	3.78877	3.76296	4.48521	3.93481	3.96917	4.03877	4	4	3.84186	4.10699	0.0774347	0.255831	1.3458	1.41129	0.0201608	0.0606434	0.265906	0.291387	0.0712469	0.0731349	1.3442	24	1.20084	1.28267	24	1.0537	0.191454	0.211859	1.06901	0.192121	0	0	0	1	0	0	0			0
445	WBGene00000567	4.99313	4.81087	4.817	4.96147	4.57587	4.57453	4.58193	4.788	4	4	4.89562	4.63008	0.0952346	0.105327	1.5882	1.53238	0.0194464	0.0224971	0.183441	0.244054	0.0354986	0.0523153	-1.73945	24	1.77004	-1.76567	24	2.17187	0.0947682	0.0901722	-1.05735	0.122814	0	0	0	0	0	0	0			0
446	WBGene00000583	2.4195	2.8075	2.487	2.6055	3.3765	2.89	3.1615	3.071	4	4	2.57987	3.12475	0.170113	0.202258	0.946139	1.13779	0.0650641	0.0646302	0.298178	0.301979	0.118256	0.107363	2.56784	24	1.02566	2.39976	24	1.21322	0.0168856	0.0245228	1.2112	0.0382282	0	0	1	0	0	0	0			0
447	WBGene00000584	2.058	2.832	2.144	2.233	2.237	2.641	1.934	2.176	4	4	2.31675	2.247	0.350852	0.293454	0.832184	0.803343	0.143131	0.12845	0.321914	0.307637	0.144114	0.12711	-0.31329	24	1.09497	-0.300178	24	1.28545	0.756767	0.766626	-1.03104	0.430202	0	0	0	0	0	0	0			0
448	WBGene00000585	4.00988	3.75253	3.86659	4.15271	3.10571	2.97418	3.23488	3.67394	4	4	3.94543	3.24718	0.173728	0.303766	1.37183	1.17462	0.0439787	0.0911366	0.274959	0.329651	0.079577	0.100414	-3.2532	24	1.43739	-3.07852	24	1.59226	0.00337559	0.00514571	-1.21503	0.0124541	0	0	0	0	0	0	0			0
449	WBGene00000591	4.01785	3.90162	3.59823	3.79077	3.83708	4.08192	3.83608	3.99331	4	4	3.82712	3.9371	0.178548	0.121578	1.34129	1.37009	0.0470051	0.0307857	0.29223	0.307624	0.0725117	0.0712948	0.51841	24	1.10813	0.566433	24	1.03443	0.608919	0.576359	1.02874	0.381625	0	0	0	0	0	0	0			0
450	WBGene00000592	4.21063	3.85575	4.27837	4.35213	3.17137	3.00275	3.69612	3.79725	4	4	4.17422	3.41688	0.220036	0.389202	1.42785	1.22381	0.0539088	0.114699	0.317044	0.379008	0.0619653	0.103422	-3.06537	24	1.42908	-3.38473	24	2.78568	0.00531031	0.00244772	-1.22165	0.0170064	0	0	0	0	0	0	0			0
451	WBGene00000593	3.766	5.225	4.135	3.271	4.353	5.837	4.385	4.146	4	4	4.09925	4.68025	0.829788	0.778408	1.39601	1.53385	0.196819	0.155577	0.50246	0.462534	0.119419	0.091997	1.70147	24	1.18009	1.82878	24	1.68501	0.101776	0.0798868	1.14173	0.12881	0	0	0	1	0	0	0			0
452	WBGene00000594	4.644	4.836	5.303	4.693	5.164	5.576	5.571	5.061	4	4	4.869	5.343	0.300581	0.269467	1.5815	1.67483	0.0603405	0.0505496	0.231161	0.271989	0.0473441	0.0511006	2.65583	24	1.38445	2.67948	24	1.16498	0.0138352	0.0131084	1.09735	0.0331357	0	0	0	0	0	0	0			0
453	WBGene00000596	4.052	4.441	4.366	3.535	3.86	4.003	4.129	3.431	4	4	4.0985	3.85575	0.411727	0.303743	1.40666	1.34715	0.103896	0.08102	0.348654	0.322428	0.0845589	0.081812	-1.02234	24	1.16929	-1.01163	24	1.06828	0.316814	0.321806	-1.06296	0.261755	0	0	0	0	0	0	0			0
454	WBGene00000597	5.699	5.63	5.809	5.871	6.317	6.173	5.871	6.101	4	4	5.75225	6.1155	0.108171	0.186099	1.74946	1.81048	0.0188132	0.0305964	0.133636	0.188563	0.023381	0.0306737	3.14344	24	1.99099	3.16413	24	1.7211	0.00440279	0.00418851	1.06315	0.0149018	0	0	0	0	0	0	0			0
455	WBGene00000598	3.69	3.045	2.986	2.709	3.295	3.21	2.869	3.201	4	4	3.1075	3.14375	0.415041	0.187999	1.12741	1.14403	0.129347	0.0614398	0.388272	0.312265	0.123046	0.0969885	0.145506	24	1.54606	0.212102	24	1.60951	0.885527	0.833818	1.01167	0.46539	0	0	0	0	0	0	0			0
456	WBGene00000599	3.615	5.205	4.409	3.627	4.263	5.451	4.69	4.061	4	4	4.214	4.61625	0.757953	0.615179	1.42669	1.52316	0.175228	0.129711	0.461985	0.386264	0.101847	0.0813858	1.33596	24	1.43049	1.47989	24	1.56603	0.194092	0.151911	1.09546	0.193902	0	0	0	1	0	0	0			0
457	WBGene00000601	3.635	4.613	4.66	4.098	4.135	4.903	4.567	3.881	4	4	4.2515	4.3715	0.483456	0.453591	1.44225	1.47107	0.116721	0.103718	0.343224	0.356976	0.0745505	0.0808062	0.484642	24	1.08174	0.524281	24	1.17486	0.632324	0.604892	1.02823	0.389649	0	0	0	1	0	0	0			0
458	WBGene00000602	4.303	4.876	5.081	4.381	5.091	5.11	5.236	4.881	4	4	4.66025	5.0795	0.378236	0.147147	1.53661	1.6249	0.0809834	0.0291571	0.263699	0.246049	0.055994	0.0493152	2.32489	24	1.14861	2.36656	24	1.2892	0.0288592	0.026366	1.08996	0.0553582	0	0	0	0	0	0	0			0
459	WBGene00000603	3.339	4.947	4.7895	3.742	3.5835	5.0985	4.749	3.616	4	4	4.20437	4.26175	0.786665	0.777727	1.42262	1.43715	0.190953	0.182822	0.466447	0.462523	0.113059	0.11111	0.174688	24	1.01704	0.183229	24	1.03541	0.86279	0.856158	1.01365	0.458686	0	0	1	0	0	0	0			0
460	WBGene00000606	3.319	4.745	4.593	3.848	3.435	4.458	4.414	3.471	4	4	4.12625	3.9445	0.665778	0.56801	1.40721	1.36449	0.166196	0.144752	0.437471	0.399877	0.106745	0.103075	-0.613305	24	1.19686	-0.575859	24	1.07248	0.545444	0.570071	-1.04608	0.359243	0	0	0	1	0	0	0			0
461	WBGene00000608	5.443	5.387	5.941	5.28	5.897	5.533	6.009	5.776	4	4	5.51275	5.80375	0.293399	0.204041	1.70603	1.75804	0.0521162	0.0354324	0.205226	0.219558	0.0370249	0.037343	1.93652	24	1.14455	1.97789	24	1.01726	0.0646644	0.059532	1.05279	0.0955071	0	0	0	1	0	0	0			0
462	WBGene00000609	5.664	5.847	5.695	5.645	6.015	6.108	6.063	6.081	4	4	5.71275	6.06675	0.0918418	0.039144	1.7426	1.80281	0.0159685	0.00645994	0.138171	0.171114	0.0237922	0.0279566	3.21914	24	1.53367	3.2799	24	1.3807	0.00366666	0.0031632	1.06197	0.0132199	0	0	0	1	0	0	0			0
463	WBGene00000610	3.364	3.753	2.957	2.781	3.217	3.737	2.854	2.881	4	4	3.21375	3.17225	0.434572	0.411118	1.16067	1.1484	0.133935	0.125626	0.409378	0.369145	0.119069	0.110874	-0.150571	24	1.22986	-0.150834	24	1.15329	0.881572	0.881367	-1.01308	0.46431	0	0	0	1	0	0	0			0
464	WBGene00000611	4.755	4.901	4.74	4.227	5.31	5.088	5.069	5.091	4	4	4.65575	5.1395	0.294914	0.114083	1.53654	1.63677	0.0651302	0.0219627	0.238354	0.230652	0.049963	0.0450067	2.91695	24	1.0679	2.9811	24	1.23238	0.00755296	0.00649046	1.1039	0.0218799	0	0	0	1	0	0	0			0
465	WBGene00000612	2.8384	3.0886	2.6868	2.4686	2.9168	3.281	2.9826	2.836	4	4	2.7706	3.0041	0.260734	0.194092	1.01574	1.09846	0.0941796	0.0632505	0.334941	0.336121	0.12537	0.110659	0.984165	24	1.00706	0.989303	24	1.28355	0.334853	0.332385	1.08428	0.270006	0	0	0	0	0	0	0			0
466	WBGene00000613	3.545	5.524	3.851	3.199	3.687	5.81	3.878	3.026	4	4	4.02975	4.10025	1.03116	1.19686	1.37145	1.38174	0.237543	0.273696	0.588094	0.659997	0.141092	0.153439	0.159503	24	1.25948	0.0986898	24	1.18268	0.874608	0.922204	1.01749	0.46236	0	0	0	0	0	0	0			0
467	WBGene00000614	2.8715	4.269	3.184	2.5675	2.811	4.2955	2.94	2.4435	4	4	3.223	3.1225	0.741366	0.809796	1.15182	1.11574	0.218186	0.241121	0.497006	0.4931	0.153679	0.155904	-0.287095	24	1.01591	-0.329664	24	1.02917	0.776504	0.744514	-1.03219	0.43596	0	0	0	1	0	0	0			0
468	WBGene00000615	3.665	5.205	5.161	4.295	3.883	5.441	5.384	3.801	4	4	4.5815	4.62725	0.740861	0.907645	1.51176	1.51732	0.167363	0.198132	0.424522	0.510214	0.0958197	0.114389	0.137857	24	1.44446	0.0745105	24	1.42515	0.891503	0.941222	1.00999	0.466841	0	0	0	0	0	0	0			0
469	WBGene00000616	3.439	5.109	4.57	3.824	4.308	5.777	4.68	3.941	4	4	4.2355	4.6765	0.748028	0.793277	1.43175	1.53227	0.177225	0.163562	0.424844	0.463715	0.109517	0.0963415	1.40243	24	1.19136	1.37835	24	1.29223	0.173589	0.180811	1.10412	0.180407	0	0	0	1	0	0	0			0
470	WBGene00000617	2.5536	3.3728	2.7154	2.4146	2.9864	3.5424	2.9052	2.586	4	4	2.7641	3.005	0.424008	0.397771	1.00843	1.09387	0.14629	0.129915	0.391801	0.377703	0.136851	0.117984	0.885315	24	1.07604	0.945736	24	1.34538	0.384771	0.353709	1.08715	0.293017	0	0	1	1	0	0	0			0
471	WBGene00000618	3.13225	4.2405	3.0565	3.02137	3.10637	4.53975	3.32325	3.376	4	4	3.36266	3.58634	0.587055	0.646224	1.20235	1.26599	0.162249	0.1685	0.426855	0.450647	0.123203	0.119523	0.720741	24	1.11458	0.741461	24	1.06254	0.478031	0.465608	1.06652	0.332843	0	0	0	1	0	0	0			0
472	WBGene00000620	5.408	5.387	5.558	5.145	5.802	5.75	5.797	5.611	4	4	5.3745	5.74	0.170901	0.0891329	1.68128	1.74737	0.0320157	0.0156282	0.190597	0.197599	0.0349345	0.0338441	2.66263	24	1.07482	2.71732	24	1.06548	0.0136226	0.0120193	1.06801	0.0328061	0	0	0	1	0	0	0			0
473	WBGene00000621	4.393	4.932	4.593	4.208	4.985	5.186	4.631	4.596	4	4	4.5315	4.8495	0.309848	0.284954	1.50932	1.57759	0.0678026	0.058485	0.228248	0.287955	0.0569204	0.0632466	1.73087	24	1.59161	1.60467	24	1.23464	0.0963133	0.121647	1.07018	0.12413	0	0	1	1	0	0	0			0
474	WBGene00000622	1.978	3.536	2.418	1.705	2.137	2.944	1.939	1.866	4	4	2.40925	2.2215	0.806554	0.495087	0.840397	0.781285	0.316021	0.207012	0.503322	0.370645	0.190666	0.152921	-0.600734	24	1.84406	-0.483701	24	1.55457	0.553649	0.632982	-1.08451	0.362203	0	0	0	0	0	0	0			0
475	WBGene00000623	2.41	3.859	2.484	2.094	2.176	3.417	2.224	1.871	4	4	2.71175	2.422	0.783309	0.681505	0.969745	0.858008	0.264461	0.258842	0.518502	0.462428	0.1736	0.178893	-0.834107	24	1.25722	-0.896486	24	1.06191	0.412446	0.378898	-1.11963	0.305197	0	0	0	0	0	0	0			0
476	WBGene00000624	2.475	2.62	2.234	2.103	2.277	2.912	2.131	2.066	4	4	2.358	2.3465	0.232905	0.387187	0.854143	0.843476	0.0990098	0.155622	0.312389	0.323619	0.133122	0.143668	-0.0511343	24	1.07319	-0.108925	24	1.16471	0.959642	0.914167	-1.0049	0.485352	0	0	0	0	0	0	0			0
477	WBGene00000625	3.65	4.304	4.144	3.319	3.737	4.301	4.05	3.546	4	4	3.85425	3.9085	0.452563	0.334114	1.3439	1.36042	0.119223	0.0853996	0.345884	0.342123	0.0914132	0.0858087	0.223021	24	1.02211	0.263487	24	1.13489	0.825407	0.794424	1.01408	0.448998	0	0	0	0	0	0	0			0
478	WBGene00000626	2.792	4.917	4.778	3.55	3.194	5.153	4.847	3.671	4	4	4.00925	4.21625	1.01777	0.934102	1.36261	1.41992	0.26799	0.226951	0.572473	0.545663	0.157256	0.128815	0.523475	24	1.10068	0.563879	24	1.49033	0.605444	0.578068	1.05163	0.38037	0	0	0	0	0	0	0			0
479	WBGene00000627	2.34529	3.14329	2.29214	1.98471	2.45271	3.12586	2.17786	2.19457	4	4	2.44136	2.48775	0.494207	0.44362	0.878159	0.900308	0.192792	0.16859	0.360138	0.345347	0.151679	0.146176	0.185957	24	1.08749	0.210286	24	1.07671	0.854041	0.835219	1.019	0.456478	0	0	0	0	0	0	0			0
480	WBGene00000628	3.1389	3.7677	2.9048	2.9154	3.101	4.1823	3.0749	2.7625	4	4	3.1817	3.28017	0.405305	0.620768	1.15168	1.1755	0.121874	0.178186	0.415299	0.446387	0.126084	0.125416	0.323027	24	1.15532	0.2679	24	1.01069	0.749472	0.791065	1.03095	0.427578	0	0	0	1	0	0	0			0
481	WBGene00000629	0.914	0.956	0.971	0.883	1.337	0.98	1.053	1.251	4	4	0.931	1.15525	0.0400749	0.166702	-0.0721952	0.136453	0.0432493	0.145025	0.170449	0.221259	0.197234	0.200827	1.6058	24	1.68505	1.48249	24	1.03677	0.121397	0.151222	1.24087	0.143745	0	0	0	0	0	0	0			0
482	WBGene00000630	2.289	2.261	2.716	2.565	1.874	1.941	1.934	2.366	4	4	2.45775	2.02875	0.220138	0.226835	0.89626	0.703017	0.0890565	0.106629	0.272459	0.253849	0.122455	0.135551	-2.30405	24	1.152	-2.11573	24	1.22531	0.0301857	0.0449353	-1.21146	0.057022	0	0	0	0	0	0	0			0
483	WBGene00000631	2.761	4.001	3.17	2.742	2.842	4.024	3.307	2.786	4	4	3.1685	3.23975	0.589072	0.572615	1.14114	1.16436	0.176718	0.170142	0.419249	0.417873	0.130694	0.127397	0.240736	24	1.0066	0.254438	24	1.05244	0.811805	0.801325	1.02249	0.445327	0	0	0	0	0	0	0			0
484	WBGene00000632	4.052	4.173	3.468	3.497	4.107	4.236	3.622	3.831	4	4	3.7975	3.949	0.367261	0.275793	1.33083	1.37162	0.0967535	0.0703299	0.318234	0.314515	0.0955209	0.0766232	0.677202	24	1.02379	0.6661	24	1.55409	0.504754	0.5117	1.03989	0.343365	0	0	1	0	0	0	0			0
485	WBGene00000633	1.837	2.276	1.704	2.051	1.846	2.06	1.535	1.491	4	4	1.967	1.733	0.250736	0.269237	0.670465	0.540926	0.126713	0.153721	0.293288	0.269437	0.148907	0.139958	-1.1751	24	1.18488	-1.26777	24	1.13197	0.251482	0.217042	-1.13503	0.227941	0	0	0	0	0	0	0			0
486	WBGene00000634	2.917	3.51	3.704	2.353	2.786	3.558	3.366	2.386	4	4	3.121	3.024	0.611733	0.537218	1.12282	1.09429	0.205379	0.182748	0.445461	0.412427	0.148554	0.137276	-0.319569	24	1.16661	-0.282117	24	1.17106	0.75206	0.780272	-1.03208	0.42864	0	0	0	1	0	0	0			0
487	WBGene00000636	3.68	5.104	5.033	3.949	3.396	5.305	5.143	3.726	4	4	4.4415	4.3925	0.732852	0.971792	1.4806	1.46105	0.167049	0.225368	0.410057	0.560036	0.0956224	0.127766	-0.141188	24	1.86528	-0.244996	24	1.7853	0.8889	0.808542	-1.01116	0.466255	0	0	0	0	0	0	0			0
488	WBGene00000637	2.244	2.625	2.57	1.945	2.456	2.863	2.628	1.951	4	4	2.346	2.4745	0.315817	0.38682	0.845627	0.896242	0.138871	0.164379	0.349842	0.342723	0.131559	0.147605	0.524765	24	1.04198	0.511976	24	1.2588	0.604561	0.613347	1.05477	0.380109	0	0	0	0	0	0	0			0
489	WBGene00000638	3.058	4.446	4.485	3.439	3.189	3.905	4.055	3.216	4	4	3.857	3.59125	0.719822	0.453182	1.33642	1.27251	0.190847	0.126377	0.455731	0.378968	0.122917	0.108739	-0.896726	24	1.44615	-0.778828	24	1.27778	0.378773	0.443693	-1.074	0.290384	0	0	0	1	0	0	0			0
490	WBGene00000639	2.5544	3.7218	3.7988	2.9154	2.6562	3.6042	3.6688	2.902	4	4	3.2476	3.2078	0.610893	0.505777	1.16418	1.15607	0.19295	0.160088	0.449571	0.426228	0.139701	0.134247	-0.12849	24	1.11253	-0.0837577	24	1.08289	0.898832	0.933944	-1.01241	0.46881	0	0	0	0	0	0	0			0
491	WBGene00000640	2.6535	2.7415	2.6215	2.706	2.4245	2.3255	2.2955	2.4385	4	4	2.68063	2.371	0.0534827	0.0711548	0.985901	0.862974	0.0199482	0.0300451	0.320929	0.275545	0.112838	0.113481	-1.46398	24	1.35654	-1.53627	24	1.01143	0.156175	0.137551	-1.13059	0.168759	0	0	0	0	0	0	0			0
492	WBGene00000641	2.631	3.45	2.806	2.372	2.937	3.574	2.662	2.446	4	4	2.81475	2.90475	0.459496	0.489324	1.02531	1.05615	0.158011	0.163155	0.3993	0.412064	0.136776	0.126775	0.313703	24	1.06496	0.330775	24	1.164	0.756457	0.743685	1.03197	0.430109	0	0	0	1	0	0	0			0
493	WBGene00000642	3.364	3.728	2.981	2.507	3.295	3.715	2.864	2.831	4	4	3.145	3.17625	0.523383	0.416754	1.13509	1.14941	0.170552	0.128694	0.398636	0.369917	0.138394	0.114209	0.114926	24	1.1613	0.159629	24	1.46836	0.90946	0.874509	1.00994	0.472026	0	0	0	0	0	0	0			0
494	WBGene00000644	4.946	4.977	4.258	4.165	5.517	5.169	4.498	5.251	4	4	4.5865	5.10875	0.434858	0.433416	1.51973	1.62814	0.0951165	0.0875241	0.294415	0.322647	0.0661395	0.0632029	2.39133	24	1.20098	2.37009	24	1.09508	0.024979	0.0261643	1.11387	0.0498052	0	0	1	0	0	0	0			0
495	WBGene00000645	1.759	2.24067	1.62367	1.525	2.40533	2.15067	2.38967	1.63433	4	4	1.78708	2.145	0.317238	0.359837	0.56955	0.751464	0.168595	0.180907	0.265563	0.320305	0.145669	0.144109	1.72044	24	1.45476	1.77558	24	1.02177	0.0982224	0.0884863	1.20028	0.125656	0	0	0	0	0	0	0			0
496	WBGene00000646	2.37467	2.67133	2.7865	2.6705	2.50817	2.42183	2.7145	2.256	4	4	2.62575	2.47512	0.176034	0.19083	0.963622	0.90407	0.0688053	0.0769093	0.323868	0.286698	0.124381	0.119045	-0.696476	24	1.27611	-0.691787	24	1.09166	0.492822	0.49571	-1.06086	0.338687	0	0	0	0	0	0	0			0
497	WBGene00000647	3.46267	4.24367	4.297	3.814	3.03967	4.22833	4.29767	3.48433	4	4	3.95433	3.7625	0.392668	0.606429	1.37102	1.31498	0.101275	0.165644	0.33344	0.429585	0.0944684	0.113774	-0.705521	24	1.65983	-0.757898	24	1.45048	0.487278	0.45589	-1.05099	0.33679	0	0	1	1	0	0	0			0
498	WBGene00000648	1.988	3.46	2.276	1.623	1.924	3.541	1.889	1.126	4	4	2.33675	2.12	0.795078	1.01637	0.808773	0.668384	0.32007	0.468569	0.482437	0.568525	0.204893	0.266321	-0.581386	24	1.38873	-0.835609	24	1.68948	0.566401	0.411617	-1.10224	0.366706	0	0	1	0	0	0	0			0
499	WBGene00000649	4.042	5.013	5.062	4.054	4.336	5.262	5.029	3.956	4	4	4.54275	4.64575	0.571659	0.605074	1.50756	1.52948	0.126321	0.131937	0.349317	0.388998	0.0766287	0.0832504	0.394016	24	1.2401	0.387447	24	1.1803	0.697048	0.70184	1.02267	0.410809	0	0	0	1	0	0	0			0
500	WBGene00000650	3.685	4.719	3.284	3.607	3.788	5.066	2.987	3.371	4	4	3.82375	3.803	0.621567	0.903304	1.33195	1.31597	0.154743	0.226236	0.425109	0.532564	0.112199	0.140161	-0.0609016	24	1.56943	-0.178061	24	1.56055	0.951942	0.86017	-1.00546	0.483475	0	0	0	0	0	0	0			0
501	WBGene00000651	3.188	2.671	2.655	3.132	2.5	2.961	2.367	2.556	4	4	2.9115	2.596	0.287926	0.255918	1.06499	0.950471	0.0990704	0.0956504	0.352612	0.289825	0.124416	0.122304	-1.38245	24	1.48021	-1.31282	24	1.03484	0.179564	0.201659	-1.12153	0.18405	0	0	0	0	0	0	0			0
502	WBGene00000652	2.75129	3.21129	2.18986	2.54829	2.62029	2.96314	1.95614	2.45671	4	4	2.67518	2.49907	0.426162	0.418975	0.974499	0.904833	0.159396	0.174217	0.363627	0.349364	0.134913	0.139539	-0.698475	24	1.08332	-0.717853	24	1.06975	0.491593	0.479778	-1.07047	0.338467	0	1	0	0	0	0	0			0
503	WBGene00000653	4.514	5.018	5.213	4.857	5.181	5.278	5.369	4.776	4	4	4.9005	5.151	0.295937	0.26152	1.58795	1.6382	0.0611116	0.0518159	0.225381	0.262729	0.0460168	0.0514173	1.44733	24	1.35888	1.45647	24	1.24849	0.160742	0.158222	1.05112	0.171648	0	0	0	1	0	0	0			0
504	WBGene00000654	1.888	1.947	1.747	1.493	2.523	2.418	2.062	1.991	4	4	1.76875	2.2485	0.202077	0.261514	0.565124	0.805176	0.118671	0.116528	0.23064	0.286386	0.136882	0.122559	2.60938	24	1.54182	2.61307	24	1.24739	0.0153746	0.015247	1.27124	0.0358397	0	0	0	0	0	0	0			0
505	WBGene00000655	2.264	3.465	3.038	2.459	2.221	3.091	2.628	2.261	4	4	2.8065	2.55025	0.548415	0.404362	1.0177	0.927121	0.194517	0.154007	0.40971	0.392301	0.155142	0.144591	-0.903496	24	1.09073	-0.85422	24	1.15127	0.375242	0.40143	-1.10048	0.288977	0	0	0	0	0	0	0			0
506	WBGene00000656	5.362	5.104	5.657	5.587	6.026	5.587	5.679	5.631	4	4	5.4275	5.73075	0.249702	0.200387	1.69067	1.7454	0.0464598	0.0344429	0.200325	0.221887	0.0362938	0.0380017	2.02885	24	1.22686	2.08274	24	1.09633	0.0537077	0.048103	1.05587	0.0844014	0	0	0	1	0	0	0			0
507	WBGene00000657	4.504	5.367	5.691	5.102	5.036	5.842	5.866	5.181	4	4	5.166	5.48125	0.502781	0.434577	1.63844	1.69896	0.0995523	0.0795694	0.298997	0.318476	0.0592875	0.0571859	1.44333	24	1.13454	1.46956	24	1.07485	0.161854	0.154669	1.06102	0.172469	0	0	0	0	0	0	0			0
508	WBGene00000658	2.611	2.205	2.418	2.075	2.03	1.626	2.175	1.956	4	4	2.32725	1.94675	0.236167	0.232375	0.840841	0.660522	0.101182	0.124304	0.300664	0.257825	0.117155	0.138801	-1.92137	24	1.35992	-1.98551	24	1.40368	0.0666387	0.0586276	-1.19545	0.0977091	0	0	0	0	0	0	0			0
509	WBGene00000659	3.123	5.23	3.449	3.281	3.189	5.538	3.464	3.196	4	4	3.77075	3.84675	0.981898	1.13474	1.30486	1.31892	0.236534	0.264625	0.574056	0.629747	0.142551	0.154938	0.178377	24	1.20344	0.133531	24	1.18134	0.859924	0.894887	1.02016	0.458154	0	0	0	0	0	0	0			0
510	WBGene00000660	4.253	5.063	4.962	4.443	4.935	5.229	4.823	4.436	4	4	4.68025	4.85575	0.393578	0.328054	1.54068	1.57843	0.0845336	0.0682014	0.271119	0.303801	0.05505	0.0637011	0.862013	24	1.25562	0.896754	24	1.339	0.397212	0.378757	1.0375	0.298232	0	0	1	1	0	0	0			0
511	WBGene00000661	2.234	1.967	1.941	2.123	2.467	1.713	1.825	1.916	4	4	2.06625	1.98025	0.137718	0.334952	0.724084	0.673267	0.0662062	0.159873	0.230319	0.31102	0.120391	0.138049	-0.444427	24	1.82354	-0.55486	24	1.31486	0.660715	0.584125	-1.04343	0.399197	0	0	0	0	0	0	0			0
512	WBGene00000662	2.1944	1.8344	1.5406	1.5681	1.8704	1.6335	1.9228	1.5545	4	4	1.78438	1.7453	0.303768	0.178941	0.568666	0.552953	0.164708	0.103112	0.259646	0.224621	0.146691	0.137777	-0.227628	24	1.33617	-0.156149	24	1.13358	0.821863	0.877222	-1.02239	0.448234	0	0	0	0	0	0	0			0
513	WBGene00000663	2.54	3.632	4.064	2.81	2.512	3.541	4.114	2.856	4	4	3.2615	3.25575	0.708447	0.714359	1.16432	1.16233	0.218636	0.219778	0.460127	0.453626	0.149468	0.144736	-0.0177981	24	1.02887	-0.0192095	24	1.06645	0.985947	0.984833	-1.00177	0.492515	0	0	0	1	0	0	0			0
514	WBGene00000664	3.043	3.576	3.042	2.661	2.668	3.113	3.007	2.806	4	4	3.0805	2.8985	0.376116	0.199557	1.11958	1.0624	0.120917	0.0691693	0.360856	0.322787	0.117583	0.11777	-0.751822	24	1.24978	-0.687079	24	1.00318	0.459468	0.498619	-1.06279	0.324963	0	0	0	0	0	0	0			0
515	WBGene00000665	2.862	4.35	3.288	2.992	2.674	4.578	3.39	2.856	4	4	3.373	3.3745	0.675287	0.857942	1.20198	1.19377	0.187925	0.24014	0.456257	0.528243	0.130698	0.149036	0.00429796	24	1.34044	-0.0828051	24	1.3003	0.996606	0.934693	1.00044	0.494742	0	0	0	0	0	0	0			0
516	WBGene00000666	2.601	4.355	4.277	3.151	2.948	4.762	4.094	3.166	4	4	3.596	3.7425	0.86176	0.841925	1.25705	1.30095	0.249704	0.223316	0.508973	0.527624	0.150387	0.138741	0.399671	24	1.07463	0.429094	24	1.17493	0.692934	0.671682	1.04074	0.409468	0	0	0	0	0	0	0			0
517	WBGene00000667	4.604	5.347	5.071	4.727	5.36	5.441	5.167	5.211	4	4	4.93725	5.29475	0.337167	0.127777	1.59507	1.6665	0.0679123	0.0241036	0.236937	0.244904	0.0478747	0.0477898	2.09825	24	1.06838	2.11177	24	1.00356	0.0465892	0.0453058	1.07241	0.0767644	0	0	0	1	0	0	0			0
518	WBGene00000668	4.941	5.083	4.854	4.573	5.276	5.522	5.364	5.311	4	4	4.86275	5.36825	0.214992	0.108696	1.58086	1.68035	0.0446929	0.0201109	0.212569	0.240577	0.0419778	0.0456294	3.1492	24	1.28088	3.20925	24	1.18154	0.00434212	0.0037556	1.10395	0.0148011	0	0	1	0	0	0	0			0
519	WBGene00000669	4.383	4.952	4.953	4.544	5.114	5.419	5.236	5.051	4	4	4.708	5.205	0.289875	0.162023	1.54783	1.64926	0.0618926	0.0309368	0.221429	0.234235	0.045428	0.0445101	3.08379	24	1.11901	3.1896	24	1.04167	0.00508121	0.0039386	1.10556	0.0165092	0	0	1	1	0	0	0			0
520	WBGene00000670	4.916	5.417	5.449	4.857	5.707	5.506	5.541	5.356	4	4	5.15975	5.5275	0.31671	0.14408	1.63947	1.70948	0.0614611	0.0260486	0.23035	0.225198	0.0448422	0.0393122	2.28315	24	1.04628	2.34792	24	1.30112	0.0315709	0.0274558	1.07127	0.0587886	0	0	0	0	0	0	0			0
521	WBGene00000671	4.629	5.367	5.326	4.645	5.455	5.462	5.246	4.976	4	4	4.99175	5.28475	0.410024	0.228933	1.60525	1.66411	0.0822683	0.0438547	0.268511	0.259444	0.052493	0.049253	1.56946	24	1.07111	1.6354	24	1.13589	0.129631	0.115014	1.0587	0.149797	0	0	0	0	0	0	0			0
522	WBGene00000672	3.781	5.18	4.697	3.867	3.989	4.974	4.626	3.766	4	4	4.38125	4.33875	0.673907	0.558696	1.46855	1.46137	0.152622	0.128752	0.406667	0.381511	0.0911019	0.0867784	-0.152436	24	1.13622	-0.114156	24	1.10213	0.880117	0.910064	-1.0098	0.464054	0	0	0	1	0	0	0			0
523	WBGene00000673	4.82	5.377	5.18	5.097	5.651	5.674	5.423	5.011	4	4	5.1185	5.43975	0.231062	0.307466	1.63209	1.6925	0.0454458	0.0576559	0.200787	0.278416	0.0404674	0.0517982	1.87173	24	1.92272	1.83815	24	1.6384	0.0734812	0.0784497	1.06276	0.104283	0	0	0	1	0	0	0			0
524	WBGene00000674	2.68814	2.93657	2.30486	2.18029	4.02729	3.96771	3.85171	3.58386	4	4	2.52746	3.85764	0.347981	0.196544	0.920142	1.34906	0.137162	0.0518377	0.328888	0.295667	0.134481	0.0787654	6.01548	24	1.23734	5.50426	24	2.91508	3.28e-06	1.17e-05	1.52629	8.82e-05	1	0	0	0	0	0	0		185112	0
525	WBGene00000675	4.795	4.886	5.033	5.424	5.668	5.175	5.275	5.416	4	4	5.0345	5.3835	0.277564	0.213885	1.6152	1.68275	0.0542227	0.0394191	0.214416	0.259195	0.0418915	0.0485035	2.07499	24	1.4613	2.1081	24	1.34059	0.0488751	0.0456511	1.06932	0.079297	0	0	0	1	0	0	0			0
526	WBGene00000676	3.0897	4.524	3.2236	2.9323	3.2558	4.8514	3.4164	3.0015	4	4	3.4424	3.63128	0.730829	0.831159	1.22094	1.27185	0.196167	0.211795	0.477025	0.518048	0.133914	0.138843	0.536409	24	1.17939	0.527859	24	1.07497	0.596614	0.602444	1.05487	0.377451	0	0	0	0	0	0	0			0
527	WBGene00000677	4.23025	4.704	5.122	4.877	5.00325	5.0405	5.11525	4.96475	4	4	4.73331	5.03094	0.376676	0.0641546	1.55219	1.61555	0.0811648	0.0127234	0.258028	0.232046	0.0543898	0.043818	1.71531	24	1.23648	1.81426	24	1.54074	0.0991731	0.0821593	1.06288	0.126535	0	0	0	1	0	0	0			0
528	WBGene00000678	2.792	4.82	4.541	3.583	3.049	5.05	4.641	3.571	4	4	3.934	4.07775	0.927507	0.926938	1.34722	1.38549	0.249096	0.233092	0.534496	0.528273	0.142594	0.136991	0.382566	24	1.0237	0.387126	24	1.08346	0.705409	0.702075	1.03654	0.413412	0	0	0	0	0	0	0			0
529	WBGene00000679	1.491	2.079	1.293	1.138	1.057	1.854	2.209	1.011	4	4	1.50025	1.53275	0.411993	0.59416	0.379393	0.369065	0.259617	0.394796	0.281349	0.360114	0.192377	0.241021	0.142235	24	1.63828	-0.0669807	24	1.56966	0.888082	0.947152	1.02166	0.466117	0	0	0	0	0	0	0			0
530	WBGene00000680	5.136	5.392	5.747	5.477	5.886	5.484	5.758	5.806	4	4	5.438	5.7335	0.251874	0.174512	1.69261	1.74597	0.0463309	0.0307904	0.207956	0.215787	0.0366008	0.0366823	1.97209	24	1.07672	2.05974	24	1.00446	0.0602302	0.0504279	1.05434	0.0909023	0	0	1	0	0	0	0			0
531	WBGene00000681	2.897	4.072	3.634	2.896	3.385	4.437	3.671	2.996	4	4	3.37475	3.62225	0.580464	0.609555	1.20537	1.27677	0.170273	0.164857	0.418851	0.420953	0.123428	0.11647	0.833568	24	1.01006	0.841459	24	1.12305	0.412744	0.408397	1.07334	0.305343	0	0	0	1	0	0	0			0
532	WBGene00000682	2.561	2.797	2.598	2.478	2.764	2.689	2.82	2.551	4	4	2.6085	2.706	0.135313	0.116439	0.957785	0.994768	0.0511609	0.0434729	0.298617	0.301628	0.122224	0.109452	0.459426	24	1.02027	0.450824	24	1.247	0.650063	0.656163	1.03738	0.395572	0	0	0	1	0	0	0			0
533	WBGene00000683	4.905	5.139	4.792	4.251	5.265	5.413	4.739	5.011	4	4	4.77175	5.107	0.37604	0.296221	1.5603	1.62934	0.0808387	0.058484	0.263255	0.286036	0.0536259	0.0531909	1.7248	24	1.18055	1.82792	24	1.01642	0.0974216	0.0800208	1.07026	0.124932	0	0	0	0	0	0	0			0
534	WBGene00000684	2.832	4.466	3.913	3.055	3.066	3.65	3.671	2.921	4	4	3.5665	3.327	0.759448	0.38971	1.25464	1.19687	0.212269	0.117998	0.48591	0.363321	0.133081	0.109715	-0.78949	24	1.78867	-0.669861	24	1.4713	0.437557	0.509341	-1.07199	0.316036	0	0	0	0	0	0	0			0
535	WBGene00000685	3.655	4.896	4.253	3.905	3.53	5.158	4.424	3.541	4	4	4.17725	4.16325	0.53827	0.784372	1.4236	1.41333	0.126178	0.18471	0.39307	0.482551	0.0860235	0.111299	-0.0449884	24	1.50712	-0.146077	24	1.67398	0.964489	0.885081	-1.00336	0.486629	0	0	0	0	0	0	0			0
536	WBGene00000686	3.57	5.296	5.246	4.237	4.403	5.511	5.389	4.211	4	4	4.58725	4.8785	0.835414	0.666414	1.51021	1.57777	0.188971	0.137517	0.463314	0.425048	0.105425	0.0886917	0.926443	24	1.18816	0.980811	24	1.41293	0.363439	0.33647	1.06349	0.283446	0	0	0	0	0	0	0			0
537	WBGene00000687	3.148	4.289	4.192	3.617	3.34	3.883	3.897	3.351	4	4	3.8115	3.61775	0.532556	0.314451	1.33041	1.28301	0.143847	0.087083	0.380592	0.337884	0.1051	0.0924394	-0.761393	24	1.26877	-0.677294	24	1.29268	0.45384	0.504696	-1.05356	0.32254	0	0	0	0	0	0	0			0
538	WBGene00000688	4.664	5.21	5.137	4.799	5.567	5.685	5.334	5.246	4	4	4.9525	5.458	0.262768	0.203085	1.59883	1.69656	0.053217	0.0371842	0.199785	0.259214	0.0417658	0.0467351	3.08919	24	1.68341	3.11851	24	1.25212	0.00501595	0.00467502	1.10207	0.0163872	0	0	0	1	0	0	0			0
539	WBGene00000689	2.4455	3.04	2.607	2.279	2.299	3.1155	2.4455	2.126	4	4	2.59287	2.4965	0.326781	0.432835	0.947011	0.904339	0.122855	0.164968	0.34158	0.356508	0.132283	0.136673	-0.390391	24	1.08931	-0.448693	24	1.06747	0.699691	0.657678	-1.0386	0.411523	0	0	0	0	0	0	0			0
540	WBGene00000690	3.243	3.308	3.544	3.247	3.385	2.624	2.928	2.551	4	4	3.3355	2.872	0.142147	0.378968	1.20396	1.04871	0.0418619	0.128358	0.314768	0.362221	0.0921573	0.128434	-1.93174	24	1.32424	-1.96415	24	1.94223	0.0652817	0.0611963	-1.16139	0.0962165	0	0	0	0	0	0	0			0
541	WBGene00000691	4.197	5.195	4.854	4.751	4.89	5.386	4.862	4.911	4	4	4.74925	5.01225	0.414185	0.249974	1.55506	1.61098	0.0890144	0.0487217	0.269511	0.270582	0.0581465	0.0512356	1.37731	24	1.00796	1.44323	24	1.28796	0.181127	0.161882	1.05538	0.185309	0	0	0	1	0	0	0			0
542	WBGene00000692	3.439	4.234	4.267	3.583	3.866	4.03	4.39	3.671	4	4	3.88075	3.98925	0.431189	0.304814	1.35136	1.38145	0.111776	0.0755979	0.345621	0.29672	0.0845212	0.0759412	0.476381	24	1.35677	0.529547	24	1.23873	0.638112	0.601291	1.02796	0.391513	0	0	0	1	0	0	0			0
543	WBGene00000693	5.463	5.483	6.05	5.943	5.987	6.092	5.94	6.026	4	4	5.73475	6.01125	0.305492	0.0642981	1.74548	1.79359	0.0532402	0.0106859	0.196747	0.177197	0.0344621	0.0286778	2.08853	24	1.23283	2.14612	24	1.44409	0.0475326	0.0421841	1.04821	0.0777965	0	0	1	1	0	0	0			0
544	WBGene00000694	2.751	4.208	4.475	3.285	3.06	4.448	4.178	3.001	4	4	3.67975	3.67175	0.802055	0.748999	1.28421	1.28491	0.225371	0.205248	0.491241	0.47728	0.139682	0.132054	-0.0233604	24	1.05936	0.00734241	24	1.11887	0.981556	0.994202	-1.00218	0.491273	0	0	0	0	0	0	0			0
545	WBGene00000695	2.764	3.546	2.525	2.9205	2.537	2.744	2.5415	2.4485	4	4	2.93887	2.56775	0.4362	0.125059	1.07012	0.942157	0.143595	0.0480149	0.40058	0.318678	0.13203	0.120797	-1.45005	24	1.58006	-1.43018	24	1.19463	0.159988	0.165556	-1.14453	0.17128	0	0	1	0	0	0	0			0
546	WBGene00000696	5.041	5.468	5.771	5.486	5.964	5.739	6.107	5.836	4	4	5.4415	5.9115	0.300917	0.159617	1.69289	1.77663	0.055933	0.0269489	0.222981	0.18514	0.0398889	0.0313134	3.24336	24	1.45057	3.30246	24	1.62272	0.00345732	0.00299385	1.08637	0.0126695	0	0	0	1	0	0	0			0
547	WBGene00000697	2.336	3.37033	2.41167	2.48933	2.34767	3.43267	2.55733	2.451	4	4	2.65183	2.69717	0.483073	0.497749	0.963946	0.980555	0.169377	0.172102	0.391446	0.390898	0.14566	0.152262	0.163895	24	1.00281	0.157644	24	1.0927	0.871186	0.876056	1.0171	0.4614	0	0	0	0	0	0	0			0
548	WBGene00000698	5.704	5.751	6.031	5.755	6.099	5.837	6.245	6.056	4	4	5.81025	6.05925	0.148977	0.168808	1.75938	1.80129	0.0253458	0.0279934	0.139147	0.190445	0.0237941	0.0314349	2.11139	24	1.87323	2.12619	24	1.74536	0.0453407	0.0439707	1.04286	0.0753243	0	0	0	0	0	0	0			0
549	WBGene00000699	4.574	5.286	5.27	4.698	5.388	5.555	5.394	5.176	4	4	4.957	5.37825	0.374157	0.155444	1.59865	1.68205	0.0757323	0.0290186	0.242684	0.249207	0.0498084	0.0465121	2.42202	24	1.05448	2.44741	24	1.14676	0.0233541	0.0220844	1.08498	0.0476033	0	0	1	1	0	0	0			0
550	WBGene00000700	3.258	4.578	3.927	3.242	3.877	5.05	4.045	3.561	4	4	3.75125	4.13325	0.636929	0.643261	1.31161	1.41049	0.165819	0.149003	0.428719	0.42313	0.115853	0.101971	1.26834	24	1.02659	1.28138	24	1.2908	0.216841	0.212301	1.10183	0.207597	0	0	0	1	0	0	0			0
551	WBGene00000701	2.987	4.532	3.785	3.281	3.625	5.007	4.129	3.406	4	4	3.64625	4.04175	0.676221	0.711144	1.28116	1.38557	0.181631	0.170252	0.452391	0.452208	0.12366	0.110869	1.23662	24	1.00081	1.25731	24	1.24404	0.228195	0.220739	1.10847	0.214467	0	0	0	1	0	0	0			0
552	WBGene00000702	2.431	2.3936	2.1278	2.0074	2.083	2.3182	2.0004	1.906	4	4	2.23995	2.0769	0.205561	0.176373	0.803258	0.728239	0.0925806	0.0833547	0.275653	0.27768	0.142425	0.12611	-0.833443	24	1.01476	-0.788706	24	1.27548	0.412813	0.438006	-1.07851	0.305355	0	0	0	0	0	0	0			0
553	WBGene00000703	4.3405	5.574	5.8775	4.8735	5.086	5.826	5.78	5.146	4	4	5.16638	5.4595	0.692749	0.397839	1.63526	1.69536	0.136567	0.0729819	0.382316	0.310148	0.0758458	0.0564262	1.19084	24	1.51952	1.27151	24	1.80676	0.24536	0.215732	1.05674	0.224517	0	0	0	1	0	0	0			0
554	WBGene00000704	3.038	4.36	4.121	3.391	3.329	4.61	4.468	3.706	4	4	3.7275	4.02825	0.617398	0.612266	1.30522	1.38445	0.168308	0.154833	0.422422	0.410706	0.117475	0.105489	1.02093	24	1.05787	1.00357	24	1.24015	0.317469	0.325598	1.08068	0.262039	0	0	0	1	0	0	0			0
555	WBGene00000705	2.209	3.723	2.565	2.06	2.109	3.172	2.263	2.266	4	4	2.63925	2.4525	0.752922	0.485237	0.942934	0.883821	0.264073	0.183453	0.483464	0.363156	0.171632	0.148555	-0.617697	24	1.77232	-0.52083	24	1.33481	0.542592	0.607258	-1.07615	0.358193	0	0	0	0	0	0	0			0
556	WBGene00000706	2.264	1.441	1.737	1.479	2.417	1.745	1.806	2.016	4	4	1.73025	1.996	0.379353	0.303722	0.531499	0.682878	0.207574	0.146652	0.284672	0.296688	0.174101	0.143982	1.29265	24	1.0862	1.34008	24	1.46214	0.208439	0.192769	1.15359	0.202582	0	0	0	0	0	0	0			0
557	WBGene00000707	4.152	5.048	4.962	3.896	4.784	5.034	5.187	4.326	4	4	4.5145	4.83275	0.577012	0.37646	1.50109	1.57307	0.129063	0.0796242	0.346397	0.301932	0.0781399	0.0663874	1.38516	24	1.31622	1.40417	24	1.3854	0.178746	0.173077	1.0705	0.183622	0	0	1	1	0	0	0			0
558	WBGene00000708	2.98165	2.71809	2.64913	2.49004	3.734	3.07057	3.25548	2.84317	4	4	2.70973	3.2258	0.204895	0.378439	0.994734	1.16615	0.0748253	0.115123	0.349462	0.385425	0.110709	0.111756	1.98389	24	1.21641	2.17937	24	1.01899	0.0588184	0.0393486	1.19045	0.0895101	0	0	0	0	0	0	0			0
559	WBGene00000710	3.454	4.173	4.0235	3.4775	3.852	4.583	4.2765	3.7985	4	4	3.782	4.1275	0.370364	0.371404	1.32666	1.41467	0.0978687	0.0891661	0.328129	0.324635	0.0885168	0.0786652	1.49703	24	1.02164	1.48645	24	1.26615	0.147422	0.150179	1.09135	0.162585	0	0	0	0	0	0	0			0
560	WBGene00000711	4.218	4.77	4.641	3.987	4.812	4.61	4.714	4.691	4	4	4.404	4.70675	0.364513	0.083144	1.47992	1.54888	0.0833689	0.0176448	0.26318	0.234945	0.0637914	0.0516941	1.71631	24	1.2548	1.67979	24	1.5228	0.0989883	0.10597	1.06874	0.126379	0	0	0	0	0	0	0			0
561	WBGene00000712	5.141	5.549	5.577	5.28	5.83	5.864	5.63	5.496	4	4	5.38675	5.705	0.211588	0.173409	1.68336	1.74099	0.0394335	0.0305124	0.19599	0.219724	0.0369585	0.0382944	2.16179	24	1.25686	2.16587	24	1.0736	0.040826	0.0404783	1.05908	0.0703089	0	0	0	1	0	0	0			0
562	WBGene00000713	5.337	5.169	5.307	5.28	5.931	5.929	5.472	5.591	4	4	5.27325	5.73075	0.0732956	0.235149	1.66257	1.74521	0.0139693	0.0411455	0.160285	0.230259	0.0317493	0.0393585	3.26141	24	2.06369	3.26843	24	1.53677	0.00330889	0.00325281	1.08676	0.0122866	0	0	0	0	0	0	0			0
563	WBGene00000714	2.666	2.802	3.303	2.469	2.993	3.037	3.036	2.936	4	4	2.81	3.0005	0.355963	0.047641	1.02739	1.09868	0.123163	0.0159478	0.376557	0.335401	0.118234	0.106976	0.755547	24	1.26047	0.894274	24	1.22156	0.457273	0.380056	1.06779	0.324133	0	0	0	0	0	0	0			0
564	WBGene00000715	4.5565	4.7345	5.0995	4.8855	5.2875	5.088	5.401	5.171	4	4	4.819	5.23688	0.230325	0.13663	1.57171	1.65547	0.0477354	0.026055	0.206571	0.226808	0.0423792	0.0416174	2.72427	24	1.20552	2.82031	24	1.03695	0.0118286	0.00947121	1.08671	0.0298509	0	0	0	1	0	0	0			0
565	WBGene00000716	5.413	4.977	5.317	5.323	5.797	5.05	5.689	5.931	4	4	5.2575	5.61675	0.192086	0.390584	1.65914	1.72386	0.0371243	0.0717031	0.179968	0.284707	0.0356807	0.0511442	2.1332	24	2.50269	2.07566	24	2.05459	0.0433346	0.0488079	1.06833	0.0731022	0	0	0	1	0	0	0			0
566	WBGene00000717	3.555	5.25	4.674	3.651	4.358	5.321	4.719	4.021	4	4	4.2825	4.60475	0.820036	0.556093	1.4409	1.5217	0.190188	0.119436	0.470684	0.364584	0.109126	0.0792638	1.08252	24	1.66672	1.19816	24	1.89541	0.289778	0.242554	1.07525	0.248666	0	0	0	1	0	0	0			0
567	WBGene00000718	3.108	4.562	4.3	3.353	3.569	4.789	4.084	3.036	4	4	3.83075	3.8695	0.70841	0.747554	1.33005	1.33906	0.186775	0.194039	0.434373	0.471156	0.120911	0.119839	0.120936	24	1.17653	0.105775	24	1.01797	0.904748	0.91664	1.01012	0.470804	0	0	0	1	0	0	0			0
568	WBGene00000719	3.459	4.593	4.026	3.598	3.905	5.05	4.449	3.811	4	4	3.919	4.30375	0.510022	0.571487	1.35967	1.45305	0.127345	0.130056	0.370042	0.393502	0.0979374	0.0872397	1.42457	24	1.13082	1.42405	24	1.26028	0.167155	0.167304	1.09818	0.176048	0	0	0	1	0	0	0			0
569	WBGene00000720	3.736	4.734	4.735	3.886	3.799	4.909	4.286	4.101	4	4	4.27275	4.27375	0.536688	0.468659	1.44629	1.4481	0.126414	0.107554	0.34984	0.344855	0.0806707	0.0855724	0.00407136	24	1.02912	0.0308018	24	1.12522	0.996785	0.975682	1.00023	0.494742	0	0	0	0	0	0	0			0
570	WBGene00000721	2.32	1.704	1.633	1.397	2.473	2.234	1.333	1.891	4	4	1.7635	1.98275	0.393525	0.49466	0.549823	0.658441	0.212419	0.270946	0.291367	0.35527	0.160623	0.183942	0.954365	24	1.48675	0.889576	24	1.31144	0.349414	0.382524	1.12433	0.276821	0	0	0	0	0	0	0			0
571	WBGene00000722	2.671	3.52	3.515	3.492	2.691	4.122	3.705	3.791	4	4	3.2995	3.57725	0.419177	0.617576	1.18711	1.26214	0.13648	0.187184	0.433528	0.426928	0.123301	0.127373	0.912972	24	1.03115	0.84652	24	1.06715	0.370338	0.405624	1.08418	0.286736	0	0	0	0	0	0	0			0
572	WBGene00000723	2.847	3.723	3.86	3.579	3.609	4.089	3.952	4.251	4	4	3.50225	3.97525	0.451648	0.273043	1.24664	1.37828	0.1371	0.0698993	0.386572	0.286019	0.110238	0.0733573	1.96723	24	1.82672	1.98829	24	2.25829	0.0608193	0.0582998	1.13506	0.0915305	0	0	0	0	0	0	0			0
573	WBGene00000724	2.114	2.225	2.494	2.166	2.014	2.282	2.185	2.436	4	4	2.24975	2.22925	0.169029	0.176842	0.808777	0.799287	0.0731244	0.0797986	0.277587	0.271682	0.132726	0.118491	-0.105557	24	1.04394	-0.106677	24	1.2547	0.916811	0.915932	-1.0092	0.474048	0	0	0	0	0	0	0			0
574	WBGene00000725	4.88	4.623	4.026	3.242	4.98	4.415	3.814	4.116	4	4	4.19275	4.33125	0.727818	0.497249	1.42129	1.461	0.182375	0.113322	0.438452	0.362232	0.112638	0.0830088	0.487051	24	1.46511	0.567627	24	1.84129	0.630641	0.57556	1.03303	0.388945	0	0	0	0	0	0	0			0
575	WBGene00000726	4.489	4.927	5.005	4.54	4.834	4.469	5.049	4.486	4	4	4.74025	4.7095	0.263435	0.281989	1.55493	1.54825	0.0555886	0.0595274	0.224406	0.271378	0.04597	0.0584614	-0.174645	24	1.46245	-0.179736	24	1.6173	0.862823	0.858869	-1.00653	0.458686	0	0	0	0	0	0	0			0
576	WBGene00000727	4.775	5.321	5.109	4.376	5.103	5.403	5.266	4.816	4	4	4.89525	5.147	0.412728	0.252451	1.58555	1.6375	0.0855252	0.0495556	0.271095	0.258129	0.0564602	0.0502762	1.34507	24	1.10298	1.37435	24	1.26113	0.191176	0.182031	1.05143	0.191903	0	0	0	1	0	0	0			0
577	WBGene00000728	5.146	5.549	5.62	5.135	5.595	5.777	5.674	5.286	4	4	5.3625	5.583	0.258016	0.211558	1.67856	1.71918	0.0481078	0.0383832	0.220533	0.221658	0.0406551	0.0390629	1.4104	24	1.01023	1.44079	24	1.08318	0.171251	0.162563	1.04112	0.178808	0	0	0	1	0	0	0			0
578	WBGene00000729	3.168	3.778	3.681	2.786	3.306	4.252	3.828	3.181	4	4	3.35325	3.64175	0.463294	0.494002	1.20252	1.28567	0.141745	0.134112	0.38925	0.398853	0.115089	0.109876	1.03532	24	1.04995	1.04508	24	1.09714	0.310838	0.306397	1.08604	0.259074	0	0	0	0	0	0	0			0
579	WBGene00000730	5.152	5.61	5.691	5.323	5.886	5.685	5.92	5.716	4	4	5.444	5.80175	0.250646	0.118413	1.69371	1.758	0.0462347	0.020411	0.205971	0.199918	0.0367353	0.0343734	2.4927	24	1.06147	2.55574	24	1.14215	0.0199761	0.0173511	1.06571	0.0427811	0	0	0	0	0	0	0			0
580	WBGene00000731	2.736	5.291	3.213	2.863	2.831	5.609	3.179	3.231	4	4	3.52575	3.7125	1.19399	1.27674	1.22289	1.27359	0.303055	0.30623	0.65712	0.725957	0.175982	0.177486	0.381436	24	1.22048	0.405658	24	1.01717	0.706236	0.688588	1.05297	0.41368	0	0	0	0	0	0	0			0
581	WBGene00000732	4.529	5.291	4.929	4.616	5.332	5.565	5.33	5.371	4	4	4.84125	5.3995	0.345549	0.111936	1.57529	1.68615	0.0705105	0.0205383	0.251698	0.243731	0.051573	0.0461458	3.18667	24	1.06644	3.20368	24	1.24905	0.0039666	0.00380662	1.11531	0.0139093	0	0	0	1	0	0	0			0
582	WBGene00000733	5.121	5.574	5.501	5.443	5.953	6.043	6.023	5.826	4	4	5.40975	5.96125	0.199822	0.0980761	1.68768	1.78518	0.0375043	0.0165355	0.175516	0.16866	0.0339043	0.0282816	4.53131	24	1.08295	4.41649	24	1.43715	0.000136767	0.000183166	1.10195	0.00132412	1	0	0	1	0	0	0		179804	0
583	WBGene00000734	3.304	4.643	4.65	3.564	3.872	4.969	4.892	3.821	4	4	4.04025	4.3885	0.708044	0.626982	1.38456	1.47128	0.17771	0.143582	0.458129	0.418407	0.116703	0.0948145	1.12259	24	1.19888	1.15339	24	1.515	0.272717	0.260106	1.0862	0.239694	0	0	0	1	0	0	0			0
584	WBGene00000735	3.5	4.831	4.735	3.684	4.129	5.191	4.887	4.011	4	4	4.1875	4.5545	0.692824	0.575074	1.4217	1.51015	0.167008	0.126097	0.426521	0.386475	0.104367	0.0875358	1.27525	24	1.21798	1.29861	24	1.42151	0.214426	0.206418	1.08764	0.20613	0	0	0	0	0	0	0			0
585	WBGene00000736	1.59752	2.11867	1.31	1.29659	1.44359	1.99604	1.27159	1.32026	4	4	1.58069	1.50787	0.384572	0.333398	0.437251	0.394099	0.230038	0.205066	0.279052	0.269957	0.178215	0.16777	-0.375129	24	1.06851	-0.352607	24	1.12839	0.710859	0.727461	-1.0483	0.414914	0	0	0	0	0	0	0			0
586	WBGene00000737	2.1026	3.3292	2.0248	1.8256	2.0316	3.2622	1.9032	1.937	4	4	2.32055	2.2835	0.682476	0.654726	0.813322	0.798976	0.266388	0.257101	0.444841	0.435781	0.174724	0.17322	-0.118993	24	1.04202	-0.116617	24	1.01745	0.906272	0.908134	-1.01623	0.471214	0	0	0	0	0	0	0			0
587	WBGene00000738	4.042	5.311	2.295	3.843	4.554	5.755	2.199	4.156	4	4	3.87275	4.166	1.23658	1.47701	1.31088	1.36966	0.350226	0.411285	0.674233	0.786867	0.192056	0.217118	0.566	24	1.36202	0.405567	24	1.27801	0.576648	0.688654	1.07572	0.370668	0	0	0	0	0	0	0			0
588	WBGene00000739	1.73825	2.40225	2.131	1.78125	2.1645	2.764	2.18225	1.87475	4	4	2.01319	2.24638	0.313387	0.372763	0.690798	0.799425	0.153492	0.160757	0.302787	0.325189	0.143615	0.13881	1.04962	24	1.15344	1.08772	24	1.07043	0.304349	0.287521	1.11583	0.256041	0	0	0	0	0	0	0			0
589	WBGene00000740	3.394	5.033	4.21	3.454	4.28	5.37	4.508	3.941	4	4	4.02275	4.52475	0.769084	0.609753	1.37876	1.50302	0.185914	0.130826	0.469363	0.402655	0.121622	0.0856584	1.62351	24	1.35879	1.67065	24	2.01597	0.117543	0.107783	1.12479	0.140961	0	0	0	0	0	0	0			0
590	WBGene00000741	3.384	4.78	4.069	3.723	4.23	5.001	4.557	3.646	4	4	3.989	4.3585	0.596898	0.57049	1.37536	1.46553	0.14682	0.133511	0.38821	0.392415	0.102928	0.0904803	1.33878	24	1.02178	1.31604	24	1.29406	0.193185	0.200592	1.09263	0.193304	0	0	0	1	0	0	0			0
591	WBGene00000742	3.068	5.028	4.059	3.516	4.129	5.468	4.409	3.821	4	4	3.91775	4.45675	0.843818	0.715659	1.34858	1.48528	0.21122	0.153971	0.503708	0.446242	0.127495	0.0990426	1.60192	24	1.27414	1.69346	24	1.65707	0.122256	0.10331	1.13758	0.144342	0	0	0	0	0	0	0			0
592	WBGene00000743	3.419	5.013	4.442	3.708	4.543	5.413	4.773	3.841	4	4	4.1455	4.6425	0.721036	0.648846	1.41075	1.52777	0.173138	0.142021	0.445229	0.404703	0.107742	0.0875219	1.65205	24	1.2103	1.68617	24	1.51544	0.111549	0.104721	1.11989	0.136424	0	0	0	0	0	0	0			0
593	WBGene00000744	2.4	3.227	2.64	2.589	3.144	3.292	2.706	2.541	4	4	2.714	2.92075	0.357242	0.354962	0.992268	1.06626	0.126396	0.12227	0.385656	0.39905	0.122617	0.126196	0.74511	24	1.07066	0.840975	24	1.05923	0.46344	0.408663	1.07618	0.326571	0	0	0	0	0	0	0			0
594	WBGene00000745	2.395	4.289	3.085	2.502	2.176	3.531	2.834	2.501	4	4	3.06775	2.7605	0.868795	0.57967	1.09327	0.999362	0.2659	0.205437	0.55228	0.434211	0.171976	0.155535	-0.874692	24	1.61777	-0.809977	24	1.22259	0.390411	0.425912	-1.1113	0.295167	0	0	1	0	0	0	0			0
595	WBGene00000746	2.169	4.158	3.506	2.137	2.394	3.677	3.208	2.311	4	4	2.9925	2.8975	1.00534	0.658667	1.05329	1.0446	0.33808	0.226003	0.605789	0.449037	0.204443	0.161954	-0.251968	24	1.82003	-0.0666908	24	1.59355	0.803211	0.94738	-1.03279	0.44284	0	0	0	0	0	0	0			0
596	WBGene00000747	2.827	3.611	3.336	2.661	3.34	2.912	2.633	2.711	4	4	3.10875	2.899	0.44112	0.316623	1.12667	1.06006	0.141881	0.106075	0.403965	0.346081	0.131677	0.117532	-0.788624	24	1.36249	-0.754734	24	1.25517	0.438053	0.457751	-1.07235	0.316128	0	0	0	0	0	0	0			0
597	WBGene00000748	3.158	4.76	4.754	3.521	3.581	5.153	4.828	3.686	4	4	4.04825	4.312	0.831707	0.795775	1.38198	1.44855	0.209873	0.185269	0.506701	0.481371	0.130207	0.113377	0.754755	24	1.10801	0.771146	24	1.31891	0.457739	0.448147	1.06515	0.324349	0	0	0	0	0	0	0			0
598	WBGene00000749	4.323	5.043	4.059	3.444	4.817	5.462	4.247	4.511	4	4	4.21725	4.75925	0.66232	0.523202	1.42988	1.55567	0.157831	0.107817	0.423157	0.35361	0.0999865	0.0739361	1.96571	24	1.43203	2.02317	24	1.82882	0.0610046	0.0543307	1.12852	0.0917407	0	0	0	1	0	0	0			0
599	WBGene00000750	2.209	3.025	2.697	2.569	2.232	2.613	2.15	1.961	4	4	2.625	2.239	0.337331	0.27394	0.958777	0.80058	0.130287	0.119685	0.360905	0.292531	0.137727	0.131769	-1.66175	24	1.52209	-1.65991	24	1.09247	0.109572	0.109944	-1.1724	0.134842	0	0	0	0	0	0	0			0
600	WBGene00000751	5.177	5.574	5.799	5.51	5.752	5.75	6.087	5.656	4	4	5.515	5.81125	0.257168	0.189211	1.70665	1.7594	0.0470206	0.0321412	0.193991	0.214832	0.0354188	0.0362907	2.04694	24	1.2264	2.08076	24	1.04984	0.0517645	0.0482989	1.05372	0.082303	0	0	0	0	0	0	0			0
601	WBGene00000752	4.91	5.362	5.709	5.52	5.366	5.479	5.96	5.736	4	4	5.37525	5.63525	0.341064	0.26616	1.68026	1.72821	0.06462	0.0470394	0.240796	0.25341	0.0450006	0.0452586	1.48754	24	1.10751	1.50263	24	1.0115	0.149893	0.14598	1.04837	0.164445	0	0	0	0	0	0	0			0
602	WBGene00000753	2.842	4.193	3.591	3.281	3.53	4.871	3.784	3.411	4	4	3.47675	3.899	0.56783	0.666412	1.23613	1.3506	0.163026	0.16103	0.401581	0.436847	0.121047	0.108654	1.4232	24	1.18335	1.40748	24	1.24112	0.167549	0.172105	1.12145	0.176334	0	0	0	1	0	0	0			0
603	WBGene00000754	3.2385	3.485	3.494	3.182	3.544	3.7855	3.705	3.636	4	4	3.34987	3.66763	0.162908	0.102591	1.20803	1.29925	0.0487227	0.0280109	0.318147	0.289623	0.0929748	0.0842938	1.47711	24	1.20668	1.45367	24	1.21658	0.152648	0.15899	1.09485	0.166271	0	0	0	1	0	0	0			0
604	WBGene00000755	2.455	3.753	3.388	2.742	2.954	4.068	3.307	2.461	4	4	3.0845	3.1975	0.592335	0.676137	1.1124	1.14573	0.193618	0.21041	0.42199	0.480433	0.142824	0.143191	0.353431	24	1.29617	0.329581	24	1.00515	0.726851	0.744575	1.03663	0.420612	0	0	0	0	0	0	0			0
605	WBGene00000756	4.428	5.215	4.948	4.073	4.677	5.5	5.113	4.336	4	4	4.666	4.9065	0.512906	0.507617	1.53571	1.58654	0.110979	0.103678	0.315978	0.366984	0.0683365	0.074914	0.993243	24	1.3489	1.00243	24	1.20177	0.330501	0.326136	1.05154	0.268087	0	0	0	0	0	0	0			0
606	WBGene00000757	5.558	5.65	5.757	5.505	6.183	6.065	5.896	6.126	4	4	5.6175	6.0675	0.110624	0.124071	1.72574	1.80279	0.019643	0.0205737	0.13623	0.179564	0.0245651	0.0295524	3.99303	24	1.73738	4.00983	24	1.44727	0.000536266	0.000513986	1.08011	0.00347351	1	0	0	0	0	0	0		181470	0
607	WBGene00000758	3.319	4.315	3.246	3.069	3.614	4.008	3.135	3.186	4	4	3.48725	3.48575	0.561727	0.409092	1.24013	1.24363	0.1516	0.115508	0.424965	0.341126	0.110904	0.0960042	-0.00550517	24	1.55194	0.0476083	24	1.33448	0.995653	0.962422	-1.00043	0.494516	0	0	0	0	0	0	0			0
608	WBGene00000759	2.741	3.126	3.269	2.594	2.59	2.82	2.928	2.751	4	4	2.9325	2.77225	0.317243	0.141662	1.07144	1.01867	0.108643	0.0515069	0.362265	0.327265	0.126023	0.102008	-0.656494	24	1.22534	-0.650954	24	1.52626	0.517752	0.52126	-1.05781	0.348557	0	0	0	0	0	0	0			0
609	WBGene00000760	1.129	1.33	1.269	1.469	1.079	0.66	0.728	1.071	4	4	1.29925	0.8845	0.141021	0.221739	0.257331	-0.147086	0.109284	0.256502	0.202267	0.223286	0.171308	0.273662	-2.75327	24	1.21864	-2.50522	24	2.55195	0.011064	0.0194269	-1.46891	0.0286059	0	0	1	0	0	0	0			0
610	WBGene00000761	4.88	4.734	4.891	4.977	4.537	4.35	4.847	5.026	4	4	4.8705	4.69	0.100805	0.303619	1.58303	1.54386	0.0207947	0.0648727	0.184433	0.290733	0.0387994	0.0587526	-1.04851	24	2.4849	-1.1129	24	2.293	0.304848	0.276775	-1.03849	0.256286	0	0	0	1	0	0	0			0
611	WBGene00000762	5.458	5.185	5.577	5.549	5.136	4.773	5.197	5.246	4	4	5.44225	5.088	0.178866	0.214767	1.69378	1.6262	0.0333066	0.043032	0.185916	0.265377	0.0336484	0.0531365	-2.18658	24	2.03747	-2.14903	24	2.49378	0.0387566	0.0419287	-1.06962	0.0679668	0	0	1	0	0	0	0			0
612	WBGene00000763	4.373	4.178	4.333	4.492	4.627	4.16	4.286	4.356	4	4	4.344	4.35725	0.129643	0.197274	1.46846	1.47108	0.0299487	0.0448101	0.21118	0.281983	0.0508587	0.0658749	0.0752211	24	1.78296	0.0630339	24	1.67768	0.940662	0.950262	1.00305	0.480854	0	0	0	0	0	0	0			0
613	WBGene00000764	4.408	4.122	4.442	4.573	4.073	3.997	4.198	4.296	4	4	4.38625	4.141	0.189987	0.132456	1.47776	1.42055	0.0438987	0.0319556	0.247983	0.272196	0.053134	0.0631396	-1.33208	24	1.20482	-1.38641	24	1.41208	0.195345	0.178368	-1.05922	0.194747	0	1	0	0	0	0	0			0
614	WBGene00000765	4.79	4.31	4.877	4.929	3.872	3.167	4.311	4.661	4	4	4.7265	4.00275	0.283526	0.643916	1.55178	1.37674	0.0617041	0.167546	0.230229	0.419402	0.0477412	0.106108	-3.02547	24	3.3185	-3.00885	24	4.93976	0.0058409	0.00607649	-1.18081	0.0182128	0	0	0	0	0	0	0			0
615	WBGene00000766	4.082	3.9275	3.87	3.816	3.8885	3.791	3.5525	3.886	4	4	3.92387	3.7795	0.114828	0.157992	1.36676	1.32892	0.0290376	0.0425229	0.273177	0.302457	0.0861722	0.0822706	-0.708483	24	1.22585	-0.635234	24	1.0971	0.485471	0.531286	-1.0382	0.336092	0	0	0	0	0	0	0			0
616	WBGene00000767	4.57527	4.23595	4.45627	4.57736	4.26145	3.94414	4.31727	4.42123	4	4	4.46122	4.23602	0.160485	0.205545	1.49493	1.44272	0.0364358	0.0494029	0.194804	0.25715	0.0446329	0.0621677	-1.39609	24	1.74252	-1.36435	24	1.94007	0.175469	0.185115	-1.05316	0.181497	0	0	1	0	0	0	0			0
617	WBGene00000768	3.24412	4.02238	3.56738	3.40675	5.20975	5.13612	4.88525	4.82163	4	4	3.56016	5.01319	0.335215	0.188693	1.26658	1.61154	0.0920949	0.0376441	0.350416	0.257896	0.0947431	0.0488263	6.67925	24	1.84619	6.47305	24	3.76519	6.57e-07	1.08e-06	1.40814	2.64e-05	1	1	1	0	0	0	0		176440	0
618	WBGene00000770	4.74836	4.47482	4.59636	4.68155	3.43918	3.24227	3.71436	4.00009	4	4	4.62527	3.59898	0.118026	0.330141	1.53129	1.27751	0.0256173	0.0914309	0.194195	0.350088	0.0441955	0.0940501	-5.1271	24	3.24994	-4.88433	24	4.52859	3.01e-05	5.57e-05	-1.28516	0.000443019	0	0	0	0	0	0	0			0
619	WBGene00000771	2.17827	2.96767	2.88813	2.31487	2.11467	2.21153	2.45113	2.07067	4	4	2.58723	2.212	0.398626	0.169935	0.941567	0.791751	0.155539	0.075064	0.358827	0.292742	0.136949	0.133452	-1.62055	24	1.50244	-1.56696	24	1.05309	0.11818	0.130215	-1.16964	0.141476	0	0	0	0	0	0	0			0
620	WBGene00000772	4.49465	4.02561	4.48548	4.54274	3.79909	3.33117	4.05061	4.16904	4	4	4.38712	3.83748	0.242312	0.371115	1.47748	1.34116	0.056812	0.0997605	0.259829	0.356309	0.0571975	0.0872437	-2.49279	24	1.88052	-2.61355	24	2.32656	0.0199718	0.0152302	-1.14323	0.0427809	0	1	0	0	0	0	0			0
621	WBGene00000773	5.342	5.023	5.374	5.424	4.565	4.062	4.916	5.061	4	4	5.29075	4.651	0.181662	0.444463	1.66551	1.53354	0.0348882	0.0980491	0.18874	0.321013	0.0334484	0.0688058	-3.43595	24	2.89279	-3.44997	24	4.23155	0.00215801	0.0020847	-1.13755	0.00901481	0	0	0	0	0	0	0			0
622	WBGene00000774	4.258	4.198	4.532	4.482	3.659	3.368	3.981	4.301	4	4	4.3675	3.82725	0.164206	0.403029	1.47366	1.33797	0.0376255	0.105612	0.214685	0.350273	0.0516854	0.090398	-2.63004	24	2.66202	-2.60611	24	3.05902	0.0146711	0.015489	-1.14116	0.0346916	0	0	0	0	0	0	0			0
623	WBGene00000775	3.6	3.869	3.794	3.473	3.916	4.013	3.74	3.901	4	4	3.684	3.8925	0.180649	0.113139	1.30309	1.35873	0.04924	0.0292538	0.298105	0.280871	0.0811311	0.0732986	1.01812	24	1.12648	1.01775	24	1.22513	0.318776	0.318948	1.0566	0.262504	0	0	0	0	0	0	0			0
624	WBGene00000776	6.04	6.191	6.05	6.024	6.244	6.13	5.92	6.236	4	4	6.07625	6.1325	0.0772458	0.150894	1.80433	1.81337	0.0126378	0.0248222	0.106079	0.175561	0.0173944	0.0286002	0.548458	24	2.73902	0.540424	24	2.70347	0.588444	0.593885	1.00926	0.374422	0	1	1	1	0	0	0			0
625	WBGene00000777	5.463	5.438	5.511	5.688	5.327	4.941	5.152	5.556	4	4	5.525	5.244	0.11281	0.261091	1.70913	1.65615	0.0202566	0.0497956	0.155845	0.253037	0.0274143	0.0477588	-1.89112	24	2.63622	-1.92395	24	3.03496	0.0707396	0.066299	-1.05359	0.101611	0	0	0	0	0	0	0			0
626	WBGene00000778	3.103	3.687	3.397	3.103	3.474	3.324	3.533	2.896	4	4	3.3225	3.30675	0.279745	0.287619	1.19811	1.19299	0.0829526	0.0901818	0.342819	0.350192	0.100017	0.0971589	-0.0642778	24	1.04348	-0.0734773	24	1.05969	0.949281	0.942035	-1.00476	0.482806	0	0	0	0	0	0	0			0
627	WBGene00000779	4.991	5.159	5.284	5.073	6.586	6.352	6.368	6.241	4	4	5.12675	6.38675	0.125279	0.144341	1.63425	1.85404	0.0243796	0.0224718	0.177906	0.179082	0.0354511	0.0278534	9.98296	24	1.01327	9.75003	24	1.61996	5.08e-10	8.04e-10	1.24577	2.32e-07	1	1	1	1	0	0	0	predominantly expressed in muscle	171986	0
628	WBGene00000780	3.841	4.138	4.575	4.415	3.877	3.818	4.301	4.056	4	4	4.24225	4.013	0.322715	0.217036	1.44289	1.38846	0.076958	0.0534869	0.288206	0.291805	0.0591209	0.0713616	-1.11792	24	1.02514	-1.17474	24	1.45696	0.274668	0.251623	-1.05713	0.240891	0	0	0	0	0	0	0			0
629	WBGene00000781	5.563	6.034	5.752	5.928	5.757	5.972	5.63	6.091	4	4	5.81925	5.8625	0.206665	0.207677	1.7607	1.76811	0.035676	0.0354537	0.155984	0.204569	0.0268955	0.0348667	0.336243	24	1.71997	0.336529	24	1.68059	0.739609	0.739397	1.00743	0.424406	0	1	0	0	0	1	0			0
630	WBGene00000782	1.812	3.01	1.439	1.315	1.863	2.63	1.235	1.631	4	4	1.894	1.83975	0.773401	0.587178	0.583539	0.572359	0.371032	0.313931	0.442684	0.381319	0.226126	0.206606	-0.185701	24	1.34775	-0.0730008	24	1.19789	0.85424	0.94241	-1.02949	0.456518	0	0	0	0	0	0	0			0
631	WBGene00000783	4.708	3.37167	3.257	2.69767	4.47767	2.91367	3.09333	2.62933	4	4	3.50858	3.2785	0.852101	0.821951	1.23447	1.16612	0.231619	0.231909	0.512048	0.525599	0.147275	0.150404	-0.62711	24	1.05363	-0.649326	24	1.04294	0.536508	0.522294	-1.07018	0.355896	0	0	0	0	0	0	0			0
632	WBGene00000784	5.44433	5.51867	5.38	5.38833	5.71633	5.41867	5.47233	5.541	4	4	5.43283	5.53708	0.0639563	0.129565	1.69241	1.71126	0.0117378	0.0232456	0.161791	0.215685	0.0293564	0.037069	0.773305	24	1.77718	0.797511	24	1.59447	0.446892	0.432974	1.01919	0.31959	0	0	0	0	0	0	0			0
633	WBGene00000785	4.617	4.7245	4.889	4.6235	4.6775	4.3415	4.7885	5.0185	4	4	4.7135	4.7065	0.12693	0.281741	1.55016	1.54758	0.0267153	0.060458	0.176411	0.272964	0.0400843	0.0577405	-0.0430759	24	2.39419	-0.073372	24	2.07497	0.965997	0.942118	-1.00149	0.48717	0	0	1	0	0	0	0			0
634	WBGene00000786	5.613	5.69	5.738	5.813	6.06	6.146	5.974	6.096	4	4	5.7135	6.069	0.0839702	0.0724891	1.74275	1.80314	0.0147002	0.0119689	0.136962	0.173113	0.0235142	0.0285263	3.22096	24	1.59757	3.26707	24	1.47174	0.00365046	0.00326358	1.06222	0.0131804	0	0	1	0	0	0	0			0
635	WBGene00000787	4.795	4.729	4.679	4.698	4.504	4.67	4.705	4.601	4	4	4.72525	4.62	0.0508617	0.0885852	1.55288	1.53026	0.0107321	0.0192508	0.17491	0.232302	0.0385884	0.050685	-0.723894	24	1.76391	-0.710208	24	1.72522	0.476128	0.48442	-1.02278	0.331916	0	0	1	0	0	0	0			0
636	WBGene00000788	5.423	5.792	5.161	5.496	6.188	5.94	5.585	5.701	4	4	5.468	5.8535	0.259509	0.267533	1.69807	1.76626	0.0474133	0.0454705	0.210485	0.224013	0.0375141	0.0384233	2.50825	24	1.13267	2.53977	24	1.04906	0.0192964	0.0179841	1.0705	0.0418285	0	0	1	0	0	0	0			0
637	WBGene00000789	3.77967	4.67633	4.8545	4.40317	3.6665	4.584	4.64717	4.57767	4	4	4.42842	4.36883	0.470646	0.469272	1.4836	1.46981	0.110231	0.113921	0.301652	0.362911	0.0692591	0.0817703	-0.25252	24	1.4474	-0.257203	24	1.39392	0.802789	0.799214	-1.01364	0.44274	0	0	1	0	0	0	0			0
638	WBGene00000792	2.99444	3.43946	2.6543	2.66146	2.71168	3.11279	2.78996	3.27653	4	4	2.93741	2.97274	0.370408	0.266744	1.07178	1.08648	0.122662	0.0894893	0.375661	0.332233	0.128562	0.113891	0.140894	24	1.27852	0.171112	24	1.27421	0.88913	0.86557	1.01203	0.466255	0	0	1	0	0	0	0			0
639	WBGene00000793	3.73629	4.18829	4.17129	3.96771	4.54229	4.78643	4.73043	4.76957	4	4	4.01589	4.70718	0.211635	0.112404	1.3892	1.54887	0.0534083	0.0241367	0.284108	0.237808	0.0698201	0.0521635	3.73164	24	1.42729	3.66413	24	1.79155	0.00103505	0.00122532	1.17214	0.00538074	1	0	0	1	0	0	0		176597	0
640	WBGene00000794	4.77	4.5525	4.889	4.8375	4.2325	3.856	4.3725	4.4135	4	4	4.76225	4.21863	0.14808	0.253866	1.56035	1.43811	0.0314474	0.0616547	0.181868	0.298732	0.03896	0.0690806	-3.10876	24	2.69805	-3.08274	24	3.14394	0.00478587	0.00509396	-1.12886	0.0158309	0	0	0	0	0	0	0			0
641	WBGene00000795	4.288	4.127	4.366	4.501	3.485	3.172	3.671	3.851	4	4	4.3205	3.54475	0.156151	0.289966	1.46288	1.26291	0.036242	0.0830633	0.231978	0.329686	0.0475884	0.0970646	-3.84872	24	2.01981	-3.69968	24	4.16025	0.000771569	0.0011212	-1.21884	0.00441988	0	0	0	0	0	0	0			0
642	WBGene00000796	4.71578	4.22984	4.44741	4.49109	3.87156	3.84447	4.06578	4.13522	4	4	4.47103	3.97926	0.199194	0.143267	1.49687	1.38061	0.0445775	0.0359632	0.202948	0.245971	0.0468336	0.0704462	-3.0843	24	1.46892	-2.74878	24	2.26256	0.00507501	0.0111793	-1.12358	0.0165051	0	0	0	0	0	0	0			0
643	WBGene00000797	3.946	3.369	3.567	3.92	3.53	2.695	3.1	3.151	4	4	3.7005	3.119	0.280574	0.341605	1.30628	1.13295	0.0765631	0.110651	0.317192	0.343569	0.0897061	0.114078	-2.48717	24	1.17323	-2.38871	24	1.61718	0.0202232	0.0251227	-1.18644	0.0431815	0	0	0	0	0	0	0			0
644	WBGene00000798	5.287	4.906	5.36	5.371	4.336	3.834	4.685	4.786	4	4	5.231	4.41025	0.21985	0.429827	1.65392	1.48023	0.0428835	0.100295	0.202136	0.333616	0.0387917	0.0764492	-4.20817	24	2.72401	-4.05216	24	3.88389	0.000310993	0.000461806	-1.1861	0.00235036	0	0	0	1	0	0	0			0
645	WBGene00000799	2.832	2.984	3.435	3.122	2.142	1.935	2.608	3.181	4	4	3.09325	2.4665	0.256779	0.553271	1.12668	0.884407	0.0818959	0.220056	0.338926	0.405704	0.115842	0.157631	-2.37115	24	1.43288	-2.47704	24	1.85164	0.0261037	0.0206831	-1.25411	0.0513354	0	0	0	0	0	0	0			0
646	WBGene00000800	4.08355	3.78991	3.91279	3.97582	3.61564	3.5277	3.61412	3.59858	4	4	3.94052	3.58901	0.122685	0.0415946	1.37095	1.27782	0.0311914	0.011651	0.2551	0.313925	0.0813832	0.0830808	-1.73796	24	1.51436	-1.60141	24	1.04216	0.0950347	0.122367	-1.09794	0.123081	0	0	0	0	0	0	0			0
647	WBGene00000802	5.8194	6.0538	5.7632	5.7842	6.1802	6.2808	5.9388	5.964	4	4	5.85515	6.09095	0.134448	0.166608	1.76713	1.80652	0.0227283	0.0273065	0.133646	0.187752	0.0226793	0.0307042	2.04634	24	1.97358	2.06422	24	1.83289	0.0518281	0.0499674	1.04027	0.0823611	0	0	0	1	0	1	0			0
648	WBGene00000803	3.2545	2.79291	2.77885	2.93909	2.86247	2.68594	2.67662	2.91144	4	4	2.94134	2.78412	0.220988	0.120479	1.07682	1.02323	0.0733266	0.0432331	0.338813	0.335186	0.106506	0.10252	-0.659765	24	1.02176	-0.72496	24	1.07927	0.515687	0.475486	-1.05647	0.347609	0	0	0	0	0	0	0			0
649	WBGene00000804	4.489	4.229	4.239	4.405	4.107	3.395	3.868	4.101	4	4	4.3405	3.86775	0.127733	0.334235	1.46767	1.34974	0.0293598	0.08943	0.206575	0.330758	0.0515461	0.0867712	-2.42457	24	2.56368	-2.33683	24	2.83374	0.0232238	0.0281235	-1.12223	0.0473761	0	0	0	0	0	0	0			0
650	WBGene00000812	5.19362	5.09925	5.24012	5.3745	5.2845	5.08312	5.15725	5.321	4	4	5.22687	5.21147	0.114546	0.110668	1.65363	1.65069	0.0218619	0.0212707	0.179205	0.227666	0.0348004	0.0412376	-0.106348	24	1.61397	-0.109039	24	1.40416	0.916191	0.914078	-1.00296	0.473951	0	0	0	0	0	0	0			0
651	WBGene00000813	4.22823	4.13515	4.39492	4.40208	3.76615	3.86415	4.025	4.12062	4	4	4.2901	3.94398	0.130847	0.158912	1.45596	1.37158	0.0306069	0.0403243	0.223986	0.293981	0.0533808	0.0703372	-1.87299	24	1.72265	-1.91116	24	1.7362	0.073301	0.0679983	-1.08776	0.10413	0	0	0	0	0	0	0			0
652	WBGene00000814	4.94987	4.6535	4.97112	5.014	4.63275	4.37788	4.70375	4.7335	4	4	4.89712	4.61197	0.164592	0.161684	1.58822	1.52818	0.0341525	0.0355793	0.19416	0.247889	0.0377443	0.0541158	-1.81123	24	1.63003	-1.81971	24	2.05563	0.0826405	0.0813002	-1.06183	0.112382	0	0	0	1	0	0	0			0
653	WBGene00000815	4.7725	4.5725	4.78188	4.8555	4.10175	4.05887	4.3655	4.5185	4	4	4.74559	4.26116	0.121218	0.218664	1.55697	1.44856	0.0257846	0.0511175	0.187327	0.272412	0.0416714	0.0697631	-2.93061	24	2.11471	-2.6682	24	2.80269	0.00731358	0.0134504	-1.11369	0.0213923	0	0	0	0	0	0	0			0
654	WBGene00000816	4.6095	4.2565	4.357	4.455	4.2715	3.7965	3.954	4.2285	4	4	4.4195	4.06262	0.150372	0.226396	1.48559	1.40065	0.0339123	0.0560774	0.211502	0.282089	0.0448122	0.0665721	-2.02441	24	1.77886	-2.11688	24	2.20695	0.0541943	0.0448279	-1.08784	0.0849007	0	0	0	0	0	0	0			0
655	WBGene00000817	5.131	4.719	5.028	4.991	4.381	3.796	4.444	4.486	4	4	4.96725	4.27675	0.175781	0.323392	1.60239	1.45094	0.0358243	0.0785971	0.178145	0.295194	0.0386061	0.0717459	-4.00542	24	2.74579	-3.71787	24	3.45369	0.000519736	0.00107133	-1.16145	0.00338607	0	0	0	0	0	0	0			0
656	WBGene00000818	4.4356	4.1994	4.4166	4.5896	4.0516	4.1342	4.3118	4.407	4	4	4.4103	4.22615	0.160527	0.16224	1.48344	1.44074	0.0366192	0.0383849	0.209112	0.265302	0.0483196	0.0659931	-1.09027	24	1.60962	-1.04419	24	1.86531	0.28642	0.306801	-1.04357	0.246736	0	0	0	0	0	0	0			0
657	WBGene00000819	3.32871	2.99514	3.03243	3.31086	3	2.56157	2.58543	2.89814	4	4	3.16679	2.76129	0.177474	0.221002	1.15154	1.0133	0.0561115	0.0799139	0.311884	0.349745	0.111929	0.117978	-1.73066	24	1.25752	-1.70009	24	1.11101	0.0963523	0.10204	-1.14685	0.124148	0	0	0	0	0	0	0			0
658	WBGene00000820	2.57345	2.82255	2.5901	2.5597	2.91375	2.93665	3.1023	3.0105	4	4	2.63645	2.9908	0.124688	0.085028	0.968619	1.09524	0.0462672	0.0282699	0.327693	0.334708	0.120362	0.102273	1.51298	24	1.04327	1.60336	24	1.38504	0.143344	0.121937	1.1344	0.159451	0	0	0	0	0	0	0			0
659	WBGene00000821	1.923	2.165	2.361	1.906	2.131	2.011	1.919	1.421	4	4	2.08875	1.8705	0.216645	0.311985	0.7326	0.614597	0.102392	0.180649	0.303341	0.294218	0.12752	0.148088	-1.03292	24	1.06297	-1.20764	24	1.34861	0.311937	0.238951	-1.11668	0.259452	0	0	0	0	0	0	0			0
660	WBGene00000822	2.957	3.819	4.504	4.285	3.653	4.165	5.266	4.376	4	4	3.89125	4.365	0.685212	0.67302	1.34606	1.46492	0.187764	0.151466	0.433517	0.432201	0.117469	0.0979272	1.54781	24	1.0061	1.55434	24	1.43893	0.134755	0.133193	1.12175	0.153441	0	1	1	1	0	0	0			0
661	WBGene00000830	3.6261	4.139	3.949	3.7506	3.463	3.8279	3.7536	3.7485	4	4	3.86618	3.69825	0.225305	0.160977	1.351	1.30713	0.0580904	0.0443759	0.285759	0.305026	0.070234	0.0880076	-0.803527	24	1.13939	-0.779181	24	1.57016	0.429557	0.443489	-1.04541	0.312457	0	0	0	0	0	0	0			0
662	WBGene00000831	3.66791	4.13845	3.94	3.77827	3.50027	3.85273	3.75945	3.82282	4	4	3.88116	3.73382	0.204715	0.16048	1.3551	1.31672	0.052465	0.0437967	0.286139	0.3056	0.0715756	0.08212	-0.703888	24	1.14065	-0.704587	24	1.31634	0.488276	0.487849	-1.03946	0.337199	0	0	0	0	0	0	0			0
663	WBGene00000832	4.25115	4.8116	3.84165	3.93415	5.03195	5.30665	4.7827	4.70575	4	4	4.20964	4.95676	0.437946	0.271649	1.43345	1.59964	0.101401	0.0543217	0.327233	0.297153	0.0796887	0.0586682	3.38051	24	1.21269	3.35879	24	1.84497	0.00247322	0.00260855	1.17748	0.00996335	1	1	1	1	0	0	0		171818	0
664	WBGene00000833	4.977	5.01125	5.17338	5.14863	5.58938	5.69225	5.652	5.341	4	4	5.07756	5.56866	0.0978776	0.157563	1.62469	1.71685	0.0192832	0.0286257	0.186337	0.212921	0.0346538	0.0373398	3.47132	24	1.30569	3.61807	24	1.16103	0.00197768	0.00137438	1.09672	0.00849073	1	0	0	1	0	0	0		176437	0
665	WBGene00000834	5.05896	4.91439	4.87628	4.96002	4.366	4.28413	4.48202	4.59067	4	4	4.95241	4.43071	0.0788477	0.134033	1.59978	1.48822	0.0158617	0.0302119	0.15532	0.260894	0.033895	0.0644189	-3.43648	24	2.82146	-3.06528	24	3.61207	0.00215515	0.00531138	-1.11775	0.00901036	0	0	0	0	0	0	0			0
666	WBGene00000835	5.036	5.018	5.468	5.529	4.666	3.975	5.152	5.136	4	4	5.26275	4.73225	0.273456	0.552878	1.65964	1.549	0.051971	0.121675	0.211638	0.366428	0.0398887	0.0789365	-2.50735	24	2.99772	-2.50206	24	3.91612	0.0193348	0.0195643	-1.1121	0.0418762	0	0	0	0	0	0	0			0
667	WBGene00000836	4.3725	3.89669	3.76888	3.94077	3.82112	3.40973	3.40415	3.60677	4	4	3.99471	3.56044	0.262196	0.197684	1.3834	1.26875	0.064146	0.0548941	0.272352	0.311665	0.0820613	0.0903399	-2.09844	24	1.30953	-1.87893	24	1.21194	0.046571	0.0724526	-1.12197	0.0767597	0	0	0	0	0	0	0			0
668	WBGene00000837	4.39068	4.06728	4.06356	4.1466	3.69876	3.56608	3.67276	3.8186	4	4	4.16703	3.68905	0.15394	0.103705	1.4267	1.30507	0.0364037	0.0280878	0.303089	0.292502	0.0547833	0.0841184	-2.26954	24	1.0737	-2.42325	24	2.35768	0.0325047	0.0232911	-1.12957	0.0599064	0	0	0	0	0	0	0			0
669	WBGene00000838	4.74089	4.59504	4.32878	4.46659	3.89237	3.72511	3.68722	3.93785	4	4	4.53282	3.81064	0.176241	0.123031	1.51078	1.33741	0.0388882	0.032287	0.195152	0.276427	0.0512027	0.0779229	-4.26857	24	2.00638	-3.71884	24	2.31603	0.000266773	0.00106875	-1.18952	0.00209813	0	0	0	0	0	0	0			0
670	WBGene00000839	4.54538	4.27595	4.35771	4.50614	3.59519	3.62119	3.79771	3.99386	4	4	4.4213	3.75199	0.126179	0.184648	1.48613	1.32139	0.0286018	0.0487429	0.206233	0.320047	0.043472	0.0804607	-3.51584	24	2.4083	-3.60266	24	3.42569	0.00177153	0.00142814	-1.17839	0.00789545	0	0	0	0	0	0	0			0
671	WBGene00000840	4.43271	4.11864	4.1925	4.31686	3.84764	3.78914	3.82457	3.91636	4	4	4.26518	3.84443	0.138436	0.0536497	1.45009	1.34655	0.0323854	0.0139156	0.253362	0.27546	0.0537342	0.0721888	-2.24844	24	1.18204	-2.30104	24	1.80484	0.0340014	0.0303812	-1.10944	0.0618602	0	0	0	0	0	0	0			0
672	WBGene00000841	2.72064	2.52364	2.65527	2.38605	2.65255	2.47218	2.52959	2.40668	4	4	2.5714	2.51525	0.148261	0.104399	0.943188	0.921732	0.058181	0.0412331	0.292312	0.289872	0.11521	0.117339	-0.27278	24	1.01691	-0.260952	24	1.0373	0.787356	0.796355	-1.02232	0.438509	0	0	0	0	0	0	0			0
673	WBGene00000843	5.779	5.665	5.459	5.827	4.957	4.041	4.66	4.651	4	4	5.6825	4.57725	0.163759	0.384734	1.73708	1.51835	0.0290592	0.0864589	0.158862	0.321791	0.0278458	0.0686708	-6.15964	24	4.10308	-5.90347	24	6.08169	2.3e-06	4.32e-06	-1.24147	6.82e-05	0	0	0	0	0	0	0	enriched in other tissue		0
674	WBGene00000845	2.367	3.0375	3.021	3.009	2.425	2.524	2.571	2.5335	4	4	2.85862	2.51337	0.327958	0.0623129	1.04496	0.921393	0.122288	0.0250088	0.379024	0.28732	0.127554	0.11609	-1.4518	24	1.74021	-1.43292	24	1.20727	0.159506	0.164779	-1.13737	0.170909	0	0	1	0	0	0	0			0
675	WBGene00000846	4.57692	4.33967	4.5845	4.64917	3.83383	3.55675	3.99033	4.26392	4	4	4.53756	3.91121	0.135855	0.295687	1.51205	1.36169	0.0303254	0.0758542	0.199991	0.329511	0.0493142	0.0828583	-3.24997	24	2.7147	-3.11864	24	2.8231	0.00340226	0.00467356	-1.16014	0.0125224	0	0	0	0	0	0	0			0
676	WBGene00000851	2.111	5.04175	2.66875	2.56475	1.8415	5.40225	2.90425	1.5635	4	4	3.09656	2.92787	1.31921	1.74784	1.0721	0.952625	0.377921	0.555174	0.733993	0.932626	0.220622	0.29672	-0.284269	24	1.61447	-0.646227	24	1.80882	0.778643	0.524264	-1.05761	0.436484	0	0	0	1	0	0	0			0
677	WBGene00000853	1.97527	3.23455	1.77673	1.937	1.88336	3.00418	1.71145	1.936	4	4	2.23089	2.13375	0.674611	0.588156	0.772627	0.732758	0.271438	0.250467	0.432207	0.410261	0.179257	0.172573	-0.326006	24	1.10985	-0.320457	24	1.07896	0.747245	0.751395	-1.04552	0.426839	0	0	0	0	0	0	0			0
678	WBGene00000854	3.6415	3.35375	3.62875	3.62775	3.28525	2.76525	3.09275	3.41475	4	4	3.56294	3.1395	0.139599	0.282403	1.26999	1.14093	0.0399803	0.0920505	0.308079	0.325514	0.0934167	0.101825	-1.88956	24	1.11639	-1.86793	24	1.18811	0.070957	0.0740303	-1.13487	0.101807	0	0	0	0	0	0	0			0
679	WBGene00000857	3.439	3.955	3.345	3.612	3.989	3.981	3.937	4.126	4	4	3.58775	4.00825	0.268648	0.0817613	1.27547	1.3882	0.0735466	0.0202453	0.310491	0.282996	0.0938302	0.0679836	2.00186	24	1.20375	1.94576	24	1.90492	0.056726	0.0634854	1.1172	0.0875548	0	1	0	0	0	0	0			0
680	WBGene00000858	3.972	4.694	3.501	3.862	4.336	4.453	4.129	4.316	4	4	4.00725	4.3085	0.500085	0.134056	1.38245	1.46022	0.121894	0.031316	0.360018	0.286059	0.100554	0.0619008	1.31027	24	1.58393	1.31735	24	2.63882	0.202507	0.20016	1.07518	0.199008	0	1	0	0	0	0	0			0
681	WBGene00000859	1.069	0.925	1.156	0.941	1.068	0.383	1.033	1.006	4	4	1.02275	0.8725	0.109746	0.327319	0.0182289	-0.213871	0.106324	0.497835	0.184256	0.255908	0.193442	0.389781	-0.952941	24	1.92897	-1.06678	24	4.0601	0.35012	0.296687	-1.17221	0.277184	0	0	1	0	0	0	0			0
682	WBGene00000860	1.627	1.573	1.865	1.94	1.012	0.958	1.22	2.006	4	4	1.75125	1.299	0.178677	0.484679	0.556418	0.216004	0.102168	0.336407	0.247424	0.320162	0.132364	0.25047	-2.2354	24	1.67439	-2.40326	24	3.58074	0.0349573	0.0243355	-1.34815	0.0629626	0	0	0	0	0	0	0			0
683	WBGene00000861	1.807	1.421	1.974	2.055	1.337	1.289	1.594	1.636	4	4	1.81425	1.464	0.281767	0.176293	0.585842	0.375699	0.165293	0.120966	0.279972	0.209771	0.156686	0.149279	-2.00234	24	1.78131	-1.94205	24	1.1017	0.0566712	0.063957	-1.23924	0.0875364	0	0	0	0	0	0	0			0
684	WBGene00000862	2.348	2.84733	2.70833	2.51167	2.39233	2.483	2.23067	2.40267	4	4	2.60383	2.37717	0.219209	0.105741	0.954307	0.865154	0.0846685	0.0450755	0.312309	0.276962	0.117628	0.118055	-1.08602	24	1.27153	-1.06992	24	1.00728	0.288259	0.295299	-1.09535	0.247747	0	0	0	1	0	0	0			0
685	WBGene00000864	1.637	1.431	2.073	1.724	1.958	2.445	2.273	2.286	4	4	1.71625	2.2405	0.267693	0.203922	0.531221	0.803468	0.153452	0.0937436	0.248283	0.280151	0.157333	0.119885	2.80095	24	1.27318	2.75272	24	1.7223	0.00990738	0.0110782	1.30546	0.0265238	0	0	0	0	0	0	0			0
686	WBGene00000865	5.568	5.063	5.416	5.332	4.711	4.068	4.508	4.746	4	4	5.34475	4.50825	0.21171	0.31169	1.67552	1.50405	0.0399459	0.0709972	0.202524	0.28084	0.0378671	0.0682563	-4.83181	24	1.92293	-4.39342	24	3.24908	6.37e-05	0.000194234	-1.18555	0.000766187	0	0	0	0	0	0	0			0
687	WBGene00000866	5.629	5.23	5.435	5.486	4.672	4.095	4.439	5.286	4	4	5.445	4.623	0.165189	0.501534	1.69435	1.52671	0.0304777	0.107012	0.182928	0.337912	0.0332131	0.0741232	-4.27848	24	3.41232	-4.12782	24	4.9807	0.000260145	0.000381286	-1.17781	0.00206864	0	0	0	0	0	0	0			0
688	WBGene00000867	5.759	5.402	5.374	5.472	4.924	4.1	4.591	5.026	4	4	5.50175	4.66025	0.176383	0.417138	1.70469	1.53596	0.031643	0.0918872	0.176676	0.316234	0.0310769	0.0694147	-4.64608	24	3.20377	-4.43712	24	4.98914	0.000102134	0.000173802	-1.18057	0.00108487	0	0	0	0	0	0	0			0
689	WBGene00000868	5.799	6.11	5.856	6.154	6.16	5.967	6.023	5.911	4	4	5.97975	6.01525	0.178244	0.106784	1.78805	1.79418	0.0298234	0.0176781	0.136391	0.178853	0.0227517	0.0295312	0.315661	24	1.71959	0.329143	24	1.68475	0.754988	0.744903	1.00594	0.42964	0	0	0	0	0	0	0			0
690	WBGene00000869	5.131	5.321	5.265	5.38	6.082	5.777	5.659	5.456	4	4	5.27425	5.7435	0.106419	0.261726	1.66268	1.7473	0.0202747	0.0453412	0.167905	0.229991	0.0326747	0.0398833	3.29576	24	1.87626	3.28217	24	1.4899	0.00304321	0.00314576	1.08897	0.011543	0	0	0	1	0	0	0			0
691	WBGene00000870	4.23933	3.95367	3.40333	3.67633	3.61233	3.308	3.07533	3.61767	4	4	3.81817	3.40333	0.359604	0.262229	1.33643	1.22249	0.0944838	0.0781853	0.335855	0.34249	0.0906026	0.0958482	-1.72961	24	1.0399	-1.72784	24	1.11914	0.0965438	0.0968644	-1.12189	0.1243	0	0	0	0	0	0	0			0
692	WBGene00000871	4.8485	4.52762	4.711	4.79425	4.24175	3.74688	4.16437	4.42788	4	4	4.72034	4.14522	0.140373	0.287667	1.55155	1.4201	0.0299999	0.0709375	0.179667	0.312283	0.0391295	0.0706393	-3.19266	24	3.02106	-3.25561	24	3.25899	0.0039095	0.00335587	-1.13874	0.0138106	0	0	0	0	0	0	0			0
693	WBGene00000872	4.0961	3.95387	3.91912	3.96285	4.3204	3.82775	3.92187	4.08858	4	4	3.98298	4.03965	0.0777334	0.216017	1.38189	1.3951	0.0193647	0.0530211	0.257768	0.299842	0.0781942	0.0738233	0.286622	24	1.35309	0.245647	24	1.12192	0.776862	0.808044	1.01423	0.436056	0	0	0	0	0	0	0			0
694	WBGene00000874	4.11771	3.87947	3.94778	4.05644	3.46589	3.41336	3.64764	3.80133	4	4	4.00035	3.58206	0.106922	0.177331	1.38611	1.27502	0.0267473	0.0492278	0.250653	0.303901	0.0761678	0.0924695	-2.12369	24	1.47	-1.85457	24	1.47385	0.0441999	0.0759855	-1.11677	0.0739419	0	0	0	0	0	0	0			0
695	WBGene00000875	4.96829	4.702	4.76229	4.9349	4.37681	4.04524	4.32676	4.66552	4	4	4.84187	4.35358	0.129787	0.254062	1.57703	1.46972	0.0268338	0.0584378	0.197798	0.282096	0.0412077	0.0657325	-2.83449	24	2.034	-2.76642	24	2.5445	0.00916322	0.0107329	-1.11216	0.0250065	0	0	0	0	0	0	0			0
696	WBGene00000876	4.44575	4.326	4.28125	4.57075	3.81975	3.757	3.88475	4.281	4	4	4.40594	3.93562	0.129981	0.236083	1.48263	1.36876	0.0293744	0.0585625	0.205948	0.324661	0.0468827	0.0759865	-2.44653	24	2.4851	-2.55059	24	2.62692	0.022127	0.0175528	-1.1195	0.0458768	0	0	0	0	0	0	0			0
697	WBGene00000877	5.162	5.159	5.09	5.265	5.377	5.11	5.005	5.436	4	4	5.169	5.232	0.0721249	0.207408	1.64261	1.6542	0.0139212	0.0397204	0.166132	0.234076	0.0306272	0.0444615	0.438965	24	1.98522	0.429576	24	2.10743	0.664613	0.671336	1.01219	0.400568	0	0	1	0	0	0	0			0
698	WBGene00000878	3.294	4.173	4.716	4.083	3.15	4.106	4.345	3.851	4	4	4.0665	3.863	0.586009	0.516361	1.39463	1.3443	0.149178	0.140221	0.398173	0.381153	0.0989425	0.0987283	-0.738391	24	1.0913	-0.720162	24	1.00434	0.467436	0.478381	-1.05268	0.328421	0	0	0	0	0	0	0			0
699	WBGene00000879	5.598	5.751	5.501	5.741	6.227	5.929	5.856	5.956	4	4	5.64775	5.992	0.120231	0.162261	1.73109	1.79015	0.0213517	0.0268	0.145337	0.188963	0.0256809	0.0315465	2.88812	24	1.69044	2.90415	24	1.50898	0.00808258	0.00778382	1.06095	0.0228625	0	0	1	1	0	0	0			0
700	WBGene00000880	4.45589	4.15678	4.51989	4.51544	3.88956	3.79144	4.18278	4.33989	4	4	4.412	4.05092	0.172632	0.254464	1.48374	1.39747	0.0398668	0.0627151	0.211409	0.306938	0.0469319	0.0717653	-1.93766	24	2.10792	-2.01222	24	2.33826	0.0645174	0.0555499	-1.08914	0.0953562	0	0	0	0	0	0	0			0
701	WBGene00000881	5.664	5.751	5.88	5.477	6.015	5.75	5.684	5.896	4	4	5.693	5.83625	0.169145	0.148482	1.7389	1.76385	0.0298276	0.0253903	0.159849	0.202306	0.0278908	0.0340915	1.11117	24	1.60176	1.13251	24	1.49407	0.277504	0.268607	1.02516	0.242292	0	0	1	1	0	0	0			0
702	WBGene00000882	5.192	5.443	5.274	4.962	5.03	5.023	4.892	4.776	4	4	5.21775	4.93025	0.199977	0.120843	1.65151	1.59516	0.0385153	0.0246265	0.199772	0.282522	0.037943	0.052841	-1.66177	24	2.00003	-1.73241	24	1.93945	0.109568	0.0960352	-1.05831	0.134842	0	0	0	0	0	0	0			0
703	WBGene00000883	6.176	6.11	6.05	6.366	6.255	6.352	6.107	6.366	4	4	6.1755	6.27	0.137029	0.119351	1.82041	1.83564	0.0220466	0.0191417	0.12091	0.172904	0.0197563	0.0276703	0.895796	24	2.04495	0.896056	24	1.96162	0.379259	0.379123	1.0153	0.290624	0	0	0	1	0	0	0			0
704	WBGene00000884	4.2336	3.7258	3.5112	3.8498	3.8346	3.5132	3.3324	3.708	4	4	3.8301	3.59705	0.303192	0.220462	1.34058	1.27869	0.0782239	0.0616471	0.294752	0.318789	0.0787247	0.0887158	-1.07354	24	1.16976	-1.0435	24	1.26993	0.293705	0.307117	-1.06479	0.250569	0	0	0	0	0	0	0			0
705	WBGene00000885	4.479	4.643	4.489	4.578	3.9	3.813	4.015	4.001	4	4	4.54725	3.93225	0.0778133	0.0945776	1.51441	1.36899	0.0170736	0.0241531	0.221929	0.306814	0.0418084	0.0709161	-3.24825	24	1.91126	-3.53292	24	2.87715	0.00341644	0.00169817	-1.1564	0.0125608	0	0	0	0	0	0	0			0
706	WBGene00000886	5.257	5.104	5.397	5.453	4.358	3.693	4.424	4.581	4	4	5.30275	4.264	0.156048	0.391989	1.6679	1.44685	0.0295805	0.095915	0.180146	0.318193	0.0329642	0.0779835	-5.68167	24	3.11984	-5.22168	24	5.59654	7.49e-06	2.37e-05	-1.24361	0.000165954	0	0	0	0	0	0	0	enriched in other tissue		0
707	WBGene00000887	4.845	4.431	5.066	5.039	4.347	3.72	4.463	4.271	4	4	4.84525	4.20025	0.293185	0.329757	1.57658	1.43272	0.061919	0.0813624	0.233347	0.316462	0.0489714	0.0762834	-3.28085	24	1.83924	-3.17405	24	2.42647	0.0031559	0.00408944	-1.15356	0.0118277	0	0	0	0	0	0	0			0
708	WBGene00000888	5.091	4.8	5.142	5.236	4.621	4.214	4.685	5.016	4	4	5.06725	4.634	0.188017	0.329188	1.62227	1.53151	0.0376126	0.0716802	0.194102	0.28994	0.0381349	0.0638383	-2.48342	24	2.23129	-2.44124	24	2.80232	0.0203922	0.0223866	-1.09349	0.0433949	0	0	0	0	0	0	0			0
709	WBGene00000889	5.106	4.588	4.679	4.813	4.174	3.493	3.774	3.891	4	4	4.7965	3.833	0.226083	0.282091	1.56707	1.34161	0.0465809	0.0738042	0.221141	0.318529	0.0439187	0.079439	-4.96946	24	2.07472	-4.96759	24	3.27167	4.49e-05	4.51e-05	-1.25137	0.000596043	0	0	0	0	0	0	0			0
710	WBGene00000890	4.71	4.446	4.612	4.679	3.804	3.531	4.153	4.386	4	4	4.61175	3.9685	0.117826	0.377188	1.52836	1.37497	0.0257778	0.0956737	0.198825	0.31332	0.0436686	0.0816942	-3.4669	24	2.48334	-3.31175	24	3.49979	0.00199938	0.0029267	-1.16209	0.00855466	0	0	0	0	0	0	0			0
711	WBGene00000891	3.78825	3.41863	3.68706	3.68394	3.15875	2.95775	3.30644	3.451	4	4	3.64447	3.21848	0.158167	0.210832	1.29249	1.16729	0.0441157	0.066005	0.305701	0.348477	0.0816509	0.101888	-1.83788	24	1.29943	-1.91782	24	1.55714	0.0784916	0.0671083	-1.13236	0.10904	0	0	0	0	0	0	0			0
712	WBGene00000892	4.1145	4.1035	4.358	4.29225	3.6325	4.12075	4.1175	4.30725	4	4	4.21706	4.0445	0.127713	0.288632	1.4388	1.39538	0.0302434	0.0733881	0.27096	0.314876	0.0634396	0.0776606	-0.830804	24	1.35043	-0.865988	24	1.49858	0.414274	0.395072	-1.04267	0.305852	0	0	0	0	0	0	0			0
713	WBGene00000893	2.455	2.858	2.253	2.127	1.93	2.554	1.781	2.201	4	4	2.42325	2.1165	0.319773	0.339553	0.878806	0.740317	0.128517	0.157878	0.317756	0.301562	0.132629	0.149916	-1.40045	24	1.11028	-1.38376	24	1.27767	0.174175	0.179167	-1.14493	0.18081	0	0	0	0	0	0	0			0
714	WBGene00000894	5.3706	5.0106	5.1562	5.3026	5.086	4.8678	4.8786	5.109	4	4	5.21	4.98535	0.160231	0.129914	1.65022	1.60625	0.030888	0.0260602	0.183846	0.264073	0.0353428	0.0500826	-1.39635	24	2.06318	-1.43478	24	2.00804	0.17539	0.164253	-1.04506	0.181453	0	0	0	0	0	0	0			0
715	WBGene00000895	2.254	2.615	3.151	2.56	2.114	2.451	2.628	2.816	4	4	2.645	2.50225	0.372846	0.298673	0.965424	0.911655	0.138104	0.122601	0.366021	0.322334	0.133232	0.131793	-0.585377	24	1.28944	-0.573839	24	1.02196	0.563758	0.571416	-1.05705	0.365748	0	0	0	0	0	0	0			0
716	WBGene00000896	5.744	5.685	5.908	5.89	5.287	4.48	5.236	5.276	4	4	5.80675	5.06975	0.109457	0.393777	1.75889	1.6209	0.0188719	0.0809586	0.130306	0.295623	0.0224794	0.0602434	-4.56252	24	5.14694	-4.29194	24	7.18207	0.000126327	0.000251396	-1.14537	0.00124728	0	0	0	0	0	0	0			0
717	WBGene00000897	3.29467	3.1494	2.94753	3.14253	3.2212	3.30547	3.31173	3.295	4	4	3.13353	3.28335	0.14247	0.0420044	1.14138	1.1888	0.0457902	0.0128698	0.343057	0.308869	0.0992541	0.0873755	0.649098	24	1.23363	0.717268	24	1.29038	0.522439	0.480132	1.04781	0.350351	0	0	0	0	0	0	0			0
718	WBGene00000898	4.71573	4.77345	4.60778	4.53927	4.17285	4.62694	4.36762	4.35488	4	4	4.65906	4.38057	0.105319	0.186792	1.53862	1.4765	0.0226226	0.0424086	0.188379	0.302301	0.0382106	0.066509	-1.56367	24	2.57522	-1.61969	24	3.02965	0.130986	0.118366	-1.06357	0.150656	0	0	0	1	0	0	0			0
719	WBGene00000899	3.59075	3.73083	3.55812	3.54167	3.71387	3.98279	3.87642	3.89267	4	4	3.60534	3.86644	0.0861104	0.111954	1.28221	1.35202	0.023652	0.0291646	0.306536	0.289325	0.0855448	0.0718308	1.23884	24	1.12251	1.24992	24	1.41829	0.227385	0.223379	1.07242	0.213941	0	0	1	0	0	0	0			0
720	WBGene00000900	4.05718	4.17647	3.95729	3.97476	5.06871	5.47865	5.24529	4.96041	4	4	4.04143	5.18826	0.100012	0.226411	1.39637	1.64569	0.0245932	0.0433734	0.287893	0.247702	0.069114	0.0492664	6.03937	24	1.35084	5.87495	24	1.96802	3.09e-06	4.64e-06	1.28377	8.36e-05	1	0	1	0	0	0	0		175781	0
721	WBGene00000901	3.61444	3.77639	3.47261	3.36978	4.48928	4.24144	4.20239	4.24822	4	4	3.55831	4.29533	0.176633	0.130865	1.26836	1.45719	0.0494561	0.0300525	0.331425	0.266527	0.0898231	0.0593577	3.46593	24	1.54628	3.50762	24	2.28993	0.00200419	0.00180794	1.20713	0.00856529	1	0	0	0	0	0	0		175054	0
722	WBGene00000902	1.98358	2.70667	1.97271	1.84054	1.79633	2.41404	1.81304	1.82412	4	4	2.12588	1.96189	0.392616	0.301654	0.742523	0.665789	0.172199	0.143814	0.320476	0.286737	0.154893	0.14472	-0.762695	24	1.24917	-0.723968	24	1.14553	0.453077	0.476084	-1.08359	0.322226	0	0	0	0	0	0	0			0
723	WBGene00000903	2.842	3.278	3.175	3.069	1.851	2.825	2.47	2.296	4	4	3.091	2.3605	0.186646	0.404764	1.1271	0.847405	0.0612813	0.176717	0.31671	0.344105	0.113679	0.15024	-3.12401	24	1.18048	-2.96914	24	1.74665	0.00461363	0.006677	-1.30947	0.0154617	0	0	1	0	0	0	0			0
724	WBGene00000904	3.04573	3.13409	2.90173	2.88655	2.90845	2.862	2.88527	2.94055	4	4	2.99202	2.89907	0.118808	0.0335302	1.09536	1.06434	0.0395565	0.0115556	0.343331	0.309049	0.11873	0.111978	-0.402454	24	1.23416	-0.380161	24	1.12422	0.690912	0.707169	-1.03206	0.408678	0	0	0	0	0	0	0			0
725	WBGene00000905	1.68967	2.17322	1.745	1.659	1.63822	2.30356	1.53711	1.57211	4	4	1.81672	1.76275	0.240316	0.362966	0.590928	0.552597	0.125276	0.189747	0.267549	0.289026	0.142131	0.159411	-0.274074	24	1.16699	-0.358947	24	1.25793	0.786373	0.722774	-1.03062	0.438361	0	0	0	0	0	0	0			0
726	WBGene00000906	2.35922	2.561	2.10359	2.23638	2.15808	2.30651	1.94265	2.07938	4	4	2.31505	2.12166	0.194375	0.15202	0.836808	0.750269	0.083454	0.0717135	0.295361	0.262375	0.126946	0.12125	-0.97903	24	1.26725	-0.985931	24	1.09615	0.337332	0.334003	-1.09115	0.271273	0	0	0	0	0	0	0			0
727	WBGene00000907	2.0567	2.2145	1.8811	1.7925	2.0161	2.0146	1.81947	1.8085	4	4	1.9862	1.91467	0.187667	0.116347	0.682899	0.648157	0.0939778	0.0608298	0.274591	0.230713	0.129633	0.12564	-0.398904	24	1.41654	-0.384902	24	1.06457	0.693491	0.7037	-1.03736	0.409601	0	0	0	0	0	0	0			0
728	WBGene00000908	4.10246	4.71692	4.29492	4.10792	5.52231	5.43508	5.07	4.74138	4	4	4.30556	5.19219	0.288468	0.358761	1.45827	1.64533	0.0654848	0.0699833	0.27411	0.286448	0.059147	0.0560199	4.47264	24	1.09204	4.59241	24	1.11476	0.000158785	0.000117076	1.20593	0.00147211	1	0	0	0	0	0	0		181263	0
729	WBGene00000910	3.294	3.561	3.766	3.257	3.676	3.52	3.617	4.231	4	4	3.4695	3.761	0.239611	0.319866	1.24224	1.32209	0.0685048	0.0822016	0.312301	0.342722	0.089843	0.0858532	1.25736	24	1.20431	1.28515	24	1.0951	0.220723	0.211005	1.08402	0.209856	0	0	0	0	0	0	0			0
730	WBGene00000911	5.06195	4.90106	4.99137	5.04695	4.58703	4.58174	4.67946	4.85408	4	4	5.00033	4.67558	0.0728106	0.127179	1.60942	1.54208	0.0146216	0.0269612	0.17941	0.245577	0.0336773	0.0523692	-2.13563	24	1.87363	-2.16328	24	2.41811	0.0431164	0.0406985	-1.06946	0.0728807	0	0	0	0	0	0	0			0
731	WBGene00000912	4.293	4.43964	4.52893	4.5145	4.88407	5.0115	4.92664	5.01921	4	4	4.44402	4.96036	0.108017	0.0659189	1.49133	1.60141	0.0245077	0.0133048	0.200017	0.26741	0.0384526	0.0501863	3.09242	24	1.78741	3.48212	24	1.70341	0.00497721	0.00192564	1.11619	0.0163136	0	0	1	1	0	0	0			0
732	WBGene00000913	5.44674	5.13339	5.23034	5.35187	4.45984	4.04761	4.52295	4.90574	4	4	5.29059	4.48403	0.137207	0.35138	1.66568	1.4982	0.0259446	0.0788384	0.178777	0.301521	0.031278	0.065242	-4.60182	24	2.84455	-4.62943	24	4.35088	0.000114308	0.000106554	-1.17987	0.0011733	0	0	0	0	0	0	0			0
733	WBGene00000914	3.74994	4.08122	3.62861	3.67889	3.57867	4.21794	3.80328	3.88156	4	4	3.78467	3.87036	0.203873	0.264906	1.3299	1.35161	0.0527513	0.0679163	0.283731	0.316062	0.0811204	0.0781078	0.403521	24	1.24088	0.38557	24	1.07863	0.690138	0.703212	1.02264	0.408553	0	0	1	0	0	0	0			0
734	WBGene00000915	5.73963	5.65637	5.69508	5.81871	5.82196	5.60042	5.63446	5.79746	4	4	5.72745	5.71357	0.0697031	0.11232	1.74521	1.7427	0.012144	0.0196643	0.130402	0.205374	0.0228381	0.0362519	-0.114068	24	2.48042	-0.117401	24	2.51965	0.910133	0.907519	-1.00243	0.472231	0	0	0	1	0	0	0			0
735	WBGene00000920	4.273	4.401	4.565	4.804	4.75	4.681	4.522	4.691	4	4	4.51075	4.661	0.229135	0.0975397	1.5055	1.53906	0.0504812	0.0210852	0.218568	0.245048	0.0475728	0.0517368	0.915152	24	1.25698	0.954989	24	1.18272	0.369215	0.349104	1.03331	0.286308	0	0	0	0	0	0	0			0
736	WBGene00000928	4.715	5.69	4.376	4.621	4.509	4.746	3.996	3.636	4	4	4.8505	4.22175	0.577622	0.500472	1.57405	1.43489	0.114208	0.120069	0.342371	0.361116	0.0684791	0.0864996	-2.52704	24	1.1125	-2.52278	24	1.59555	0.0185036	0.0186808	-1.14893	0.0406789	0	0	0	0	0	0	0			0
737	WBGene00000929	4.514	5.008	4.31	4.472	4.034	4.187	3.888	4.101	4	4	4.576	4.0525	0.301131	0.126287	1.51925	1.39897	0.0643668	0.0313326	0.254056	0.284912	0.0539654	0.0640063	-2.74276	24	1.25766	-2.87341	24	1.40674	0.0113355	0.00836623	-1.12918	0.0290067	0	0	0	0	0	0	0			0
738	WBGene00000930	1.632	3.92	3.619	2.872	1.225	2.885	3.135	2.071	4	4	3.01075	2.329	1.0193	0.864899	1.04928	0.783282	0.395619	0.426337	0.623123	0.516718	0.225384	0.245772	-1.68439	24	1.45425	-1.59532	24	1.1891	0.10507	0.123727	-1.29272	0.131358	0	0	0	0	0	0	0			0
739	WBGene00000931	5.26374	4.85654	5.03182	5.07159	4.94449	4.88923	4.98903	5.23626	4	4	5.05592	5.01475	0.167103	0.153209	1.62015	1.61204	0.0330313	0.0301987	0.181045	0.24828	0.0369768	0.0475121	-0.267985	24	1.88065	-0.269485	24	1.65101	0.791001	0.78986	-1.00821	0.439509	0	0	0	1	0	0	0			0
740	WBGene00000932	2.847	2.792	2.754	2.084	2.652	2.456	2.258	2.491	4	4	2.61925	2.46425	0.35887	0.161836	0.955092	0.900253	0.147831	0.0662036	0.356054	0.313357	0.136664	0.124539	-0.653585	24	1.29108	-0.593182	24	1.20421	0.519593	0.558608	-1.0629	0.349328	0	0	0	0	0	0	0			0
741	WBGene00000933	4.946	4.664	4.726	4.857	3.955	3.748	3.942	4.126	4	4	4.79825	3.94275	0.127181	0.154552	1.56799	1.3713	0.026477	0.0393202	0.195386	0.3009	0.0397136	0.0713162	-4.76907	24	2.3717	-4.81912	24	3.22477	7.47e-05	6.58e-05	-1.21698	0.000861768	0	0	1	0	0	0	0			0
742	WBGene00000934	2.28063	2.43038	2.00687	2.10462	1.96325	2.21663	1.61987	1.7785	4	4	2.20562	1.89456	0.18783	0.256493	0.788303	0.632177	0.0848903	0.134491	0.287462	0.26963	0.132162	0.134031	-1.57849	24	1.13665	-1.65888	24	1.02848	0.127543	0.110154	-1.16419	0.148307	0	0	1	0	0	0	0			0
743	WBGene00000935	5.49778	5.18067	5.55822	5.672	4.98456	4.69489	5.21678	5.41822	4	4	5.47717	5.07861	0.21045	0.311189	1.70002	1.62362	0.038935	0.0617091	0.185753	0.280983	0.0347961	0.0562155	-2.3665	24	2.28817	-2.31143	24	2.61006	0.0263695	0.0297098	-1.07848	0.0517367	0	0	0	0	0	0	0			0
744	WBGene00000936	3.901	4.052	3.548	3.43	5.226	4.643	4.749	4.561	4	4	3.73275	4.79475	0.292129	0.297622	1.31485	1.56612	0.0782914	0.060646	0.324745	0.255313	0.0800711	0.0516611	5.14172	24	1.61785	5.27386	24	2.40228	2.9e-05	2.08e-05	1.28451	0.000434045	1	0	1	0	0	0	0		179068	0
745	WBGene00000937	4.671	4.28022	4.516	4.51033	3.88089	3.35633	3.92856	3.96378	4	4	4.49439	3.78239	0.161018	0.286061	1.50234	1.3281	0.0360743	0.0786429	0.196468	0.33201	0.044815	0.0836423	-3.69117	24	2.85575	-3.67258	24	3.48341	0.00114529	0.00119974	-1.18824	0.00580091	0	0	0	0	0	0	0			0
746	WBGene00000938	5.03514	5.019	5.02167	5.06481	4.68405	5.02995	4.9051	5.07029	4	4	5.03515	4.92235	0.0209945	0.173733	1.61644	1.59331	0.00416355	0.0356761	0.159858	0.288382	0.0319629	0.0567835	-0.684265	24	3.25435	-0.709825	24	3.15609	0.500363	0.484653	-1.02292	0.341559	0	0	0	0	0	0	0			0
747	WBGene00000939	4.61727	4.35567	4.52382	4.50788	3.72549	3.70864	3.99603	4.24737	4	4	4.50116	3.91938	0.108333	0.255248	1.50412	1.36437	0.0241901	0.0644269	0.190943	0.323755	0.041413	0.0797572	-3.09565	24	2.87492	-3.11012	24	3.70908	0.00493883	0.0047702	-1.14844	0.0162333	0	0	0	0	0	0	0			0
748	WBGene00000940	3.515	3.05	3.6	3.55	2.646	2.315	2.785	2.886	4	4	3.42875	2.658	0.254898	0.248935	1.23002	0.974145	0.0772074	0.0966336	0.357551	0.3163	0.0951523	0.121256	-3.22911	24	1.27784	-3.32014	24	1.62393	0.00357907	0.00286737	-1.28997	0.0130084	0	0	0	0	0	0	0			0
749	WBGene00000941	5.267	5.124	5.558	5.409	4.946	4.773	5.369	5.291	4	4	5.3395	5.09475	0.186431	0.282475	1.67467	1.62705	0.0349236	0.0556954	0.186007	0.289594	0.037015	0.0555706	-1.4222	24	2.42394	-1.42651	24	2.25389	0.167835	0.166601	-1.04804	0.176469	0	0	0	0	0	0	0			0
750	WBGene00000942	3.92391	4.736	4.26433	4.02294	5.82424	5.87842	5.69045	5.49494	4	4	4.2368	5.72202	0.362213	0.170757	1.44114	1.74398	0.0836438	0.0300593	0.279545	0.21539	0.0669691	0.0375047	8.41724	24	1.68443	7.89096	24	3.18844	1.27e-08	4.02e-08	1.35055	1.68e-06	1	1	1	0	1	0	0	muscle-enriched	177482	0
751	WBGene00000950	1.86762	2.75923	2.47562	2.35485	3.40585	4.13708	3.78754	4.21869	4	4	2.36433	3.88729	0.371997	0.371465	0.850645	1.35418	0.164537	0.0977745	0.315788	0.340587	0.148152	0.0845997	6.55801	24	1.16323	5.90295	24	3.06673	8.79e-07	4.33e-06	1.64414	3.24e-05	1	0	1	0	0	0	0		181035	0
752	WBGene00000951	2.4008	2.6372	2.5832	2.2678	3.5089	3.2429	2.9627	2.879	4	4	2.47225	3.14838	0.169729	0.286328	0.90334	1.14383	0.0692751	0.0899754	0.281364	0.321606	0.111483	0.104344	3.16455	24	1.30651	3.14991	24	1.14152	0.00418435	0.00433476	1.27349	0.0144098	0	1	1	0	0	0	0			0
753	WBGene00000952	1.7585	2.0019	1.9653	1.8068	1.8463	2.2228	1.8417	1.759	4	4	1.88312	1.91745	0.118627	0.207481	0.63144	0.646846	0.0631314	0.1037	0.242089	0.254897	0.133122	0.131745	0.195284	24	1.10861	0.164518	24	1.02102	0.846814	0.870701	1.01823	0.454912	0	1	0	0	0	0	0			0
754	WBGene00000953	2.30729	2.46443	2.00757	2.11043	2.12229	2.25	1.95886	2.10886	4	4	2.22243	2.11	0.203693	0.119159	0.795462	0.745483	0.0913957	0.0568029	0.286604	0.249879	0.133189	0.115197	-0.591358	24	1.31554	-0.567638	24	1.33676	0.55981	0.575553	-1.05328	0.364526	0	0	0	0	0	0	0			0
755	WBGene00000955	2.24289	2.85167	2.84122	2.59656	3.42078	3.37633	3.28478	3.17211	4	4	2.63308	3.3135	0.285591	0.109958	0.963522	1.19759	0.11252	0.0333909	0.351036	0.331286	0.134351	0.094613	2.81935	24	1.12278	2.84887	24	2.01641	0.00949235	0.00886064	1.25841	0.0257233	0	0	0	0	0	0	0			0
756	WBGene00000958	3.11181	4.04871	3.19714	3.1379	3.80433	4.32581	3.92319	3.89314	4	4	3.37389	3.98662	0.451295	0.231689	1.20985	1.38172	0.126205	0.0567812	0.377354	0.267124	0.1171	0.0749735	2.65058	24	1.99559	2.47203	24	2.43948	0.0140016	0.0209138	1.18161	0.0334547	0	0	0	0	0	0	0			0
757	WBGene00000959	4.393	4.466	4.527	4.472	4.946	4.947	5.202	4.616	4	4	4.4645	4.92775	0.0550061	0.240212	1.4961	1.59398	0.0123403	0.0490923	0.181435	0.300843	0.040434	0.0589656	2.6372	24	2.74941	2.73809	24	2.12668	0.0144344	0.0114583	1.10376	0.0342448	0	0	1	1	0	0	0			0
758	WBGene00000960	2.12565	2.52165	1.9857	1.9134	1.9815	2.48325	1.7961	1.96075	4	4	2.1366	2.0554	0.271399	0.297048	0.753461	0.713092	0.122322	0.138189	0.293162	0.308115	0.139806	0.144456	-0.38185	24	1.10462	-0.401624	24	1.06762	0.705933	0.691515	-1.03951	0.413599	0	0	0	0	0	0	0			0
759	WBGene00000961	3.99327	4.2862	3.67567	3.5648	4.50387	4.78833	4.41567	4.34633	4	4	3.87998	4.51355	0.326053	0.194201	1.35321	1.5064	0.0833053	0.0424314	0.318226	0.264763	0.078123	0.0596534	3.06096	24	1.44463	3.11696	24	1.7151	0.00536653	0.00469248	1.16329	0.0171373	0	0	0	0	0	0	0			0
760	WBGene00000962	5.09287	4.78301	5.01737	5.01001	4.68303	4.60093	4.81977	4.94812	4	4	4.97582	4.76296	0.13388	0.152918	1.60431	1.56048	0.0271919	0.0320351	0.167729	0.251308	0.0356951	0.0497046	-1.40898	24	2.2449	-1.43249	24	1.93899	0.171668	0.164902	-1.04469	0.179142	0	0	0	0	0	0	0			0
761	WBGene00000963	3.90975	3.6165	3.331	3.4355	3.63675	3.422	3.122	3.40975	4	4	3.57319	3.39763	0.253484	0.211259	1.2716	1.22161	0.0700103	0.062819	0.327718	0.340408	0.103539	0.0960514	-0.743088	24	1.07895	-0.708011	24	1.162	0.464641	0.485758	-1.05167	0.326961	0	0	0	0	0	0	0			0
762	WBGene00000964	2.51213	2.6845	2.69075	2.3455	4.33537	3.96988	3.82912	4.076	4	4	2.55822	4.05259	0.1642	0.213927	0.937736	1.39832	0.0651405	0.0523484	0.298858	0.297947	0.122385	0.0686909	7.08225	24	1.00613	6.56371	24	3.17436	2.54e-07	8.67e-07	1.58415	1.3e-05	1	1	1	0	0	0	0	exclusively expressed in muscle	177852	0
763	WBGene00000965	5.518	5.326	5.26	5.371	4.325	4.317	4.577	4.966	4	4	5.36875	4.54625	0.109445	0.304764	1.68044	1.51266	0.0202867	0.0658279	0.177043	0.29573	0.032379	0.0683679	-4.77262	24	2.7902	-4.43589	24	4.45839	7.4e-05	0.000174345	-1.18092	0.000858957	0	0	0	0	0	0	0			0
764	WBGene00000966	2.661	2.913	3.338	2.966	2.3995	2.2635	2.7975	2.741	4	4	2.9695	2.55037	0.279386	0.259788	1.08512	0.932305	0.0931731	0.102706	0.334561	0.361398	0.113309	0.127584	-1.70209	24	1.16686	-1.7911	24	1.26785	0.101659	0.0858996	-1.16434	0.12871	0	0	0	0	0	0	0			0
765	WBGene00000967	3.992	4.466	4.972	4.794	3.513	3.628	4.616	4.521	4	4	4.556	4.0695	0.430463	0.579405	1.51299	1.39585	0.0966822	0.143207	0.2937	0.385332	0.0658481	0.0979655	-2.00826	24	1.72132	-1.98476	24	2.2134	0.0559977	0.0587156	-1.11955	0.0868334	0	0	0	0	0	0	0			0
766	WBGene00000968	2.781	3.485	3.572	3.185	3.222	3.026	3.504	3.431	4	4	3.25575	3.29575	0.357287	0.21592	1.17571	1.191	0.113225	0.0662445	0.368806	0.325668	0.116457	0.0921075	0.162597	24	1.28247	0.205902	24	1.5986	0.872197	0.838604	1.01229	0.461766	0	0	0	0	0	0	0			0
767	WBGene00000969	3.128	3.804	3.255	3.06	2.791	2.776	2.608	2.706	4	4	3.31175	2.72025	0.337971	0.0835	1.19376	1.00037	0.098245	0.03095	0.363571	0.292944	0.110041	0.122616	-2.53371	24	1.54032	-2.34771	24	1.24161	0.0182298	0.0274684	-1.21744	0.040273	0	0	0	0	0	0	0			0
768	WBGene00000970	4.1194	4.1768	4.3466	4.2676	4.308	4.2424	4.3778	4.167	4	4	4.2276	4.2738	0.100081	0.090144	1.44142	1.45234	0.0236463	0.0211053	0.241921	0.255738	0.0547203	0.0596999	0.262475	24	1.11748	0.26948	24	1.19028	0.795195	0.789863	1.01093	0.440626	0	0	1	0	0	0	0			0
769	WBGene00000971	2.043	2.595	3.288	3.295	2.182	2.532	2.795	2.936	4	4	2.80525	2.61125	0.605016	0.331543	1.01267	0.953533	0.22825	0.130904	0.417666	0.34095	0.164064	0.122048	-0.71964	24	1.50064	-0.578438	24	1.80703	0.478697	0.568357	-1.07429	0.333122	0	0	0	0	0	0	0			0
770	WBGene00000972	2.922	2.767	2.47	2.733	2.931	2.483	2.864	2.461	4	4	2.723	2.68475	0.187657	0.247344	0.999913	0.9844	0.0700989	0.0922188	0.333138	0.322842	0.126204	0.112514	-0.164904	24	1.0648	-0.183503	24	1.25814	0.8704	0.855945	-1.01425	0.461103	0	0	0	0	0	0	0			0
771	WBGene00000973	3.886	3.895	4.144	3.824	3.765	3.292	4.015	3.661	4	4	3.93725	3.68325	0.141401	0.300174	1.37001	1.30125	0.0353942	0.0827482	0.264329	0.30982	0.0876639	0.0925632	-1.24737	24	1.37382	-1.0786	24	1.1149	0.224297	0.291486	-1.06896	0.212032	0	1	0	0	0	0	0			0
772	WBGene00000974	3.354	3.07	3.634	3.867	2.982	2.467	2.913	3.486	4	4	3.48125	2.962	0.345183	0.417294	1.24366	1.07838	0.100037	0.141505	0.361283	0.380197	0.100428	0.134779	-1.98007	24	1.10744	-1.96664	24	1.80106	0.0592723	0.0608914	-1.1753	0.0899424	0	0	0	0	0	0	0			0
773	WBGene00000975	4.529	3.875	4.674	4.636	4.37	3.688	4.38	4.371	4	4	4.4285	4.20225	0.374072	0.342863	1.48523	1.43297	0.0881394	0.0852646	0.265685	0.322614	0.0606168	0.0776588	-1.08271	24	1.47446	-1.06088	24	1.64133	0.289696	0.299304	-1.05384	0.248626	0	1	0	0	0	0	0			0
774	WBGene00000976	2.927	2.787	3.028	3.117	3.513	3.313	3.075	2.886	4	4	2.96475	3.19675	0.141658	0.273811	1.08593	1.15938	0.0480876	0.085849	0.32174	0.349266	0.107585	0.105218	0.977106	24	1.17842	0.976131	24	1.0455	0.338264	0.338737	1.07825	0.271624	0	0	0	0	0	0	0			0
775	WBGene00000977	3.715	3.541	4.39	3.905	3.318	2.912	3.779	3.941	4	4	3.88775	3.4875	0.366347	0.465677	1.35459	1.24227	0.0922552	0.136875	0.33061	0.36075	0.0808266	0.103158	-1.63591	24	1.19064	-1.71412	24	1.62892	0.114907	0.0993941	-1.11477	0.139143	0	0	0	0	0	0	0			0
776	WBGene00000978	1.837	2.539	2.986	2.204	1.846	1.93	2.436	1.736	4	4	2.3915	1.987	0.489153	0.309694	0.856028	0.678121	0.206649	0.148007	0.362567	0.291056	0.159137	0.143621	-1.74001	24	1.55175	-1.65987	24	1.22775	0.0946666	0.109952	-1.20357	0.122746	0	0	0	0	0	0	0			0
777	WBGene00000979	1.904	2.9185	1.99125	1.892	1.678	2.51575	1.7405	1.84475	4	4	2.17644	1.94475	0.496682	0.386831	0.760356	0.651672	0.208389	0.184764	0.372392	0.301353	0.163126	0.152064	-0.967278	24	1.52703	-0.974697	24	1.15079	0.343052	0.339433	-1.11913	0.273852	0	0	0	0	0	0	0			0
778	WBGene00000980	4.423	4.284	4.277	4.689	3.905	4.182	3.73	3.811	4	4	4.41825	3.907	0.192616	0.196786	1.48504	1.36184	0.0429899	0.049638	0.219924	0.308194	0.0481734	0.0772049	-2.70062	24	1.96382	-2.70781	24	2.56847	0.0124888	0.0122847	-1.13085	0.0309393	0	0	1	0	0	0	0			0
779	WBGene00000981	4.363	4.648	4.513	4.069	4.101	4.046	3.966	4.016	4	4	4.39825	4.03225	0.248456	0.0564764	1.47999	1.39425	0.057233	0.0140017	0.249383	0.287934	0.0561757	0.0715877	-1.92168	24	1.33308	-1.88441	24	1.62398	0.0665981	0.071678	-1.09077	0.0976918	0	0	1	0	0	0	0			0
780	WBGene00000982	3.605	3.875	4.296	4.098	3.222	3.9	4.134	3.956	4	4	3.9685	3.803	0.297154	0.399975	1.37626	1.33136	0.0754942	0.110397	0.304804	0.345876	0.088785	0.0928758	-0.71798	24	1.28766	-0.698881	24	1.09427	0.479701	0.491344	-1.04352	0.333521	0	1	0	0	0	0	0			0
781	WBGene00000983	3.389	4.679	4.858	3.968	3.178	4.377	4.916	4.371	4	4	4.2235	4.2105	0.6762	0.734227	1.43063	1.42503	0.165356	0.187454	0.416804	0.46143	0.104133	0.112044	-0.0418137	24	1.2256	-0.0732391	24	1.15771	0.966993	0.942223	-1.00309	0.487347	0	0	0	0	0	0	0			0
782	WBGene00000984	4.047	4.724	4.863	4.669	3.983	4.399	4.665	4.511	4	4	4.57575	4.3895	0.36183	0.292116	1.51831	1.4775	0.0820263	0.0680389	0.274578	0.316594	0.0596885	0.0698554	-0.888861	24	1.32946	-0.888156	24	1.36968	0.382901	0.383272	-1.04243	0.292182	0	0	1	0	0	0	0			0
783	WBGene00000985	4.986	4.831	5.26	5.256	4.386	3.959	4.503	4.676	4	4	5.08325	4.381	0.21148	0.305515	1.6253	1.4754	0.0418215	0.0712905	0.207349	0.322406	0.0390053	0.0710259	-3.66398	24	2.41771	-3.69975	24	3.31578	0.00122578	0.00112099	-1.16029	0.00608301	0	0	0	0	0	0	0			0
784	WBGene00000986	1.571	1.532	1.383	1.57	1.174	1.078	1.122	1.526	4	4	1.514	1.225	0.0892001	0.204467	0.413404	0.193322	0.0605741	0.156807	0.197284	0.221773	0.13239	0.188731	-1.94728	24	1.26368	-1.90931	24	2.03225	0.0632933	0.0682472	-1.23592	0.0941731	0	0	0	0	0	0	0			0
785	WBGene00000987	3.103	3.156	3.317	3.064	3.144	3.232	3.41	2.841	4	4	3.16	3.15675	0.11125	0.237809	1.15011	1.14737	0.0348091	0.0766244	0.293715	0.325748	0.108126	0.100619	-0.0148195	24	1.23002	-0.0372084	24	1.15479	0.988299	0.970627	-1.00103	0.493078	0	0	0	0	0	0	0			0
786	WBGene00000988	4.278	3.525	4.381	4.251	4.98	2.831	4.385	3.996	4	4	4.10875	4.048	0.393177	0.90664	1.40945	1.37739	0.100552	0.241959	0.335248	0.532857	0.0812244	0.13651	-0.192996	24	2.52632	-0.403702	24	2.82459	0.848586	0.690006	-1.01501	0.455401	0	1	1	1	0	0	0			0
787	WBGene00000989	1.978	2.276	2.659	2.819	1.7	2.011	2.569	3.021	4	4	2.433	2.32525	0.379362	0.586848	0.87971	0.819591	0.159723	0.255135	0.338248	0.410631	0.137758	0.181584	-0.405071	24	1.47378	-0.527526	24	1.7375	0.689013	0.602672	-1.04634	0.408339	0	0	0	0	0	0	0			0
788	WBGene00000990	2.957	3.085	2.863	3.117	2.959	2.179	2.209	2.801	4	4	3.0055	2.537	0.117489	0.401467	1.09987	0.921558	0.0392908	0.158562	0.354005	0.382028	0.112421	0.141027	-1.79905	24	1.16459	-1.97733	24	1.57367	0.0845995	0.059599	-1.18467	0.113918	0	0	1	0	0	0	0			0
789	WBGene00000991	4.6442	4.2954	4.641	4.2972	4.5776	4.4108	4.486	4.425	4	4	4.46945	4.47485	0.199942	0.0758712	1.49651	1.49837	0.0447576	0.0168806	0.201414	0.273236	0.0469844	0.0544663	0.0318162	24	1.84033	0.0514749	24	1.34384	0.974882	0.959373	1.00121	0.489442	0	0	0	0	0	0	0			0
790	WBGene00000992	3.615	4.158	3.723	3.66	3.463	3.628	3.39	3.001	4	4	3.789	3.3705	0.249956	0.26569	1.33053	1.21265	0.0641485	0.0809234	0.294825	0.328931	0.0861726	0.0915251	-1.89486	24	1.24475	-1.87548	24	1.12808	0.0702202	0.072944	-1.12417	0.100994	0	0	0	1	0	0	0			0
791	WBGene00000993	5.086	4.997	5.459	5.14	5.5	5.359	5.492	5.306	4	4	5.1705	5.41425	0.201167	0.0968999	1.64241	1.68891	0.0383768	0.0179188	0.191657	0.237257	0.0357573	0.0437729	1.59837	24	1.53245	1.64547	24	1.49858	0.123044	0.112908	1.04714	0.144834	0	0	0	1	0	0	0			0
792	WBGene00000994	4.51285	4.1206	4.38225	4.39155	3.63345	3.28015	3.7131	3.88725	4	4	4.35181	3.62849	0.165225	0.255265	1.47004	1.28691	0.0384309	0.071764	0.212608	0.328684	0.0517557	0.0965259	-3.69559	24	2.39	-3.3441	24	3.47834	0.00113273	0.0027041	-1.19935	0.0057605	0	0	0	0	0	0	0			0
793	WBGene00000995	4.82469	4.61931	4.35275	4.49481	4.71962	4.90069	4.45913	4.68412	4	4	4.57289	4.69089	0.200096	0.181293	1.51943	1.54506	0.0436034	0.0388153	0.216266	0.264913	0.0495329	0.0534223	0.690101	24	1.50048	0.703567	24	1.16321	0.496751	0.488472	1.0258	0.340178	0	0	0	0	0	0	0			0
794	WBGene00000996	5.593	5.604	5.501	5.328	5.522	5.289	5.182	5.341	4	4	5.5065	5.3335	0.127647	0.142034	1.70573	1.67374	0.0233648	0.0265118	0.15968	0.252328	0.0290741	0.0459302	-1.15871	24	2.49706	-1.17671	24	2.49566	0.257975	0.250852	-1.03244	0.231837	0	1	0	0	0	0	0			0
795	WBGene00000998	3.60429	4.18064	4.07226	3.73771	5.49529	5.60754	5.38458	5.36774	4	4	3.89872	5.46379	0.272158	0.111289	1.35881	1.69799	0.0700053	0.0202909	0.304865	0.241315	0.0787408	0.0429861	8.05046	24	1.59605	7.56152	24	3.3554	2.82e-08	8.43e-08	1.40143	2.9e-06	1	1	0	1	0	0	0	muscle-enriched	175951	0
796	WBGene00001000	2.9668	3.0324	2.9417	2.9346	2.4407	2.7882	2.6627	2.8215	4	4	2.96888	2.67828	0.0445458	0.172512	1.0881	0.983573	0.0149229	0.0657871	0.311429	0.318717	0.0936341	0.109162	-1.30428	24	1.04735	-1.45359	24	1.35917	0.204509	0.159011	-1.1085	0.200255	0	1	1	1	1	0	0			0
797	WBGene00001001	4.73134	4.40383	4.5281	4.66979	4.09783	3.90928	4.15731	4.45048	4	4	4.58327	4.15372	0.146805	0.22432	1.52203	1.42292	0.0321555	0.0536048	0.217657	0.294309	0.0448579	0.0701581	-2.34691	24	1.82836	-2.38019	24	2.44612	0.0275159	0.0255943	-1.10341	0.0535059	0	0	1	0	0	0	0			0
798	WBGene00001002	4.02533	3.6805	3.77975	3.89367	3.55883	3.22308	3.5225	3.71767	4	4	3.84481	3.50552	0.148556	0.206484	1.34617	1.25301	0.0385673	0.0598682	0.256401	0.313437	0.074541	0.0895599	-1.67572	24	1.49438	-1.59896	24	1.44357	0.106774	0.122913	-1.09679	0.132631	0	0	0	0	0	0	0			0
799	WBGene00001005	5.367	5.261	5.18	5.52	5.147	5.061	5.069	5.276	4	4	5.332	5.13825	0.146872	0.0996908	1.67344	1.63657	0.027443	0.01929	0.179703	0.225706	0.0340816	0.0446708	-1.34312	24	1.57752	-1.31242	24	1.71794	0.191798	0.201792	-1.03771	0.192302	0	1	0	1	0	0	0			0
800	WBGene00001006	4.21724	4.55359	3.60728	3.79248	4.37359	4.59317	3.8849	3.9741	4	4	4.04265	4.20644	0.425704	0.334101	1.39277	1.43426	0.104799	0.0791284	0.343687	0.320073	0.0813959	0.0745391	0.697517	24	1.15299	0.751929	24	1.19244	0.492182	0.459405	1.04052	0.338571	0	0	1	0	0	0	0			0
801	WBGene00001007	4.21933	3.90133	4.14433	4.24167	3.65133	3.51067	3.871	3.93767	4	4	4.12667	3.74267	0.155884	0.197197	1.41692	1.31875	0.0383784	0.0529695	0.299366	0.334318	0.0669187	0.0847963	-1.71137	24	1.24713	-1.81768	24	1.60568	0.0999087	0.0816199	-1.1026	0.12707	0	0	0	0	0	0	0			0
802	WBGene00001008	4.12907	4.34638	4.10279	3.98272	4.78469	4.77493	4.72607	4.64393	4	4	4.14024	4.73241	0.151472	0.0643168	1.42026	1.55436	0.0363056	0.0136467	0.276634	0.244566	0.069622	0.0511364	3.20747	24	1.27944	3.10491	24	1.85367	0.00377185	0.00483031	1.14303	0.013464	0	0	1	0	0	0	0			0
803	WBGene00001016	4.67798	4.28932	4.44651	4.48929	3.55688	3.27732	3.71954	3.99002	4	4	4.47577	3.63594	0.159886	0.298455	1.4982	1.28833	0.0356571	0.0824488	0.197752	0.353995	0.0478098	0.097125	-4.14237	24	3.20445	-3.87745	24	4.12695	0.000367474	0.000717757	-1.23098	0.00263845	0	0	0	0	0	0	0			0
804	WBGene00001017	4.39404	4.25939	4.26086	4.2708	4.16012	4.05386	4.05477	4.18207	4	4	4.29627	4.11271	0.0653724	0.0680199	1.45766	1.41398	0.0151044	0.0165341	0.213563	0.257004	0.0495601	0.0644269	-1.09869	24	1.4482	-1.07484	24	1.68994	0.282803	0.293136	-1.04463	0.245005	0	0	0	0	0	0	0			0
805	WBGene00001018	4.78	4.679	4.513	4.77	4.123	3.563	3.676	3.971	4	4	4.6855	3.83325	0.123651	0.258646	1.54421	1.34201	0.0266263	0.0674394	0.195756	0.31565	0.0389584	0.0757385	-4.58911	24	2.60004	-4.74814	24	3.77948	0.000118064	7.88e-05	-1.22233	0.00119359	0	0	0	0	0	0	0			0
806	WBGene00001019	5.217	5.038	5.085	5.304	4.616	4.377	4.345	4.646	4	4	5.161	4.496	0.121778	0.15691	1.64092	1.50273	0.0235598	0.0349126	0.179655	0.24678	0.0339865	0.0582572	-4.35711	24	1.88686	-4.09781	24	2.93824	0.00021302	0.000411403	-1.14791	0.0018037	0	0	0	0	0	0	0			0
807	WBGene00001020	3.374	3.343	3.591	3.454	1.98	1.789	2.396	2.701	4	4	3.4405	2.2165	0.110696	0.410548	1.23523	0.783044	0.0319123	0.185406	0.307786	0.346065	0.093542	0.150813	-5.28572	24	1.2642	-5.09603	24	2.59934	2.02e-05	3.26e-05	-1.55222	0.000341947	0	0	1	0	0	0	0	enriched in multiple tissues, including muscle		0
808	WBGene00001021	4.604	4.512	4.683	4.578	3.62	3.205	3.966	4.401	4	4	4.59425	3.798	0.0707124	0.508319	1.52472	1.32769	0.015378	0.134817	0.181236	0.386875	0.0371566	0.101021	-3.72757	24	4.55673	-3.66086	24	7.39177	0.00104566	0.00123534	-1.20965	0.00542747	0	1	0	0	0	0	0			0
809	WBGene00001022	4.308	4.33	4.475	4.54	3.385	3.238	3.705	3.791	4	4	4.41325	3.52975	0.112378	0.261429	1.48437	1.25916	0.025429	0.074443	0.200849	0.320094	0.0458259	0.0906413	-4.67597	24	2.53991	-4.43477	24	3.91228	9.47e-05	0.000174845	-1.2503	0.0010238	0	0	0	0	0	0	0			0
810	WBGene00001023	5.1015	4.863	5.14075	5.1479	5.3799	4.91285	5.02765	5.0645	4	4	5.06329	5.09622	0.135074	0.199839	1.62174	1.62793	0.0270209	0.0387235	0.178669	0.268539	0.0373564	0.0506066	0.204235	24	2.25899	0.196771	24	1.8352	0.839892	0.845664	1.00651	0.453105	0	0	0	0	0	0	0			0
811	WBGene00001025	3.482	3.809	3.574	3.3505	3.919	3.593	3.681	3.711	4	4	3.55388	3.726	0.193237	0.138068	1.26694	1.31483	0.0539245	0.0366716	0.324063	0.306646	0.0848264	0.0801991	0.771604	24	1.11682	0.8204	24	1.11872	0.44788	0.420062	1.04843	0.319979	0	0	1	0	0	0	0			0
812	WBGene00001026	4.15462	3.9015	4.05781	4.13292	3.62888	3.69738	3.83096	3.81042	4	4	4.06171	3.74191	0.114579	0.0955361	1.4013	1.31935	0.0284817	0.0256004	0.269182	0.31378	0.065534	0.0782303	-1.54708	24	1.35881	-1.60605	24	1.42501	0.13493	0.121343	-1.08546	0.153608	0	0	0	0	0	0	0			0
813	WBGene00001027	3.99115	3.70792	3.77077	3.98185	3.27154	2.96954	3.40877	3.46677	4	4	3.86292	3.27915	0.145032	0.222051	1.35089	1.18581	0.0376155	0.0693484	0.295862	0.344454	0.065861	0.100454	-2.57126	24	1.35545	-2.74867	24	2.32636	0.0167564	0.0111822	-1.17802	0.0380314	0	0	0	0	0	0	0			0
814	WBGene00001028	4.263	4.289	4.461	4.698	4.7	4.768	4.847	5.166	4	4	4.42775	4.87025	0.200445	0.206114	1.48713	1.58249	0.0447778	0.0416854	0.213354	0.295958	0.0453539	0.0545566	2.4257	24	1.92424	2.68802	24	1.44699	0.0231662	0.0128546	1.09994	0.0472873	0	0	0	0	0	0	0			0
815	WBGene00001029	4.58329	4.07436	4.40464	4.51221	3.76229	3.36471	3.88543	4.20921	4	4	4.39363	3.80541	0.225158	0.349062	1.47914	1.33322	0.0522462	0.0928115	0.246039	0.32889	0.0543935	0.0898594	-2.8642	24	1.78687	-2.77846	24	2.72919	0.00854879	0.0104379	-1.15457	0.0237945	0	0	0	0	0	0	0			0
816	WBGene00001030	5.12025	5.07175	5.0465	5.1295	5.06775	4.91425	5.107	4.9385	4	4	5.092	5.00687	0.0395163	0.0948425	1.62765	1.61068	0.00776507	0.0189364	0.176105	0.243775	0.032151	0.0475628	-0.56612	24	1.91618	-0.591208	24	2.18851	0.576568	0.559909	-1.017	0.370668	0	0	0	0	0	0	0			0
817	WBGene00001031	5.237	4.613	4.575	5.01	4.185	3.938	4.291	4.341	4	4	4.85875	4.18875	0.319821	0.179374	1.57917	1.4317	0.0654836	0.0434575	0.240473	0.276552	0.0494473	0.0685105	-3.65639	24	1.32258	-3.4907	24	1.91968	0.00124919	0.00188521	-1.15995	0.00617787	0	0	0	0	0	0	0			0
818	WBGene00001032	4.594	4.714	4.173	4.184	4.661	4.545	3.794	4.111	4	4	4.41625	4.27775	0.278903	0.400051	1.4838	1.45009	0.0630703	0.0948197	0.236907	0.325819	0.0528704	0.0780664	-0.687612	24	1.89146	-0.715098	24	2.18023	0.498289	0.481447	-1.03238	0.340817	0	0	0	0	0	0	0			0
819	WBGene00001033	4.283	3.966	4.272	4.15	3.413	3.107	3.956	4.111	4	4	4.16775	3.64675	0.147387	0.468022	1.4269	1.28754	0.0357478	0.13022	0.302554	0.385089	0.0550682	0.108335	-2.12772	24	1.62	-2.29352	24	3.87023	0.0438315	0.0308765	-1.14287	0.0735704	0	0	0	0	0	0	0			0
820	WBGene00001034	4.494	4.416	4.409	4.453	3.312	3.02	3.617	4.336	4	4	4.443	3.57125	0.0390982	0.565103	1.4913	1.26385	0.00878413	0.154135	0.186997	0.416232	0.0368935	0.117758	-3.82088	24	4.95453	-3.68631	24	10.1878	0.000827489	0.0011593	-1.2441	0.00464758	0	0	0	0	0	0	0			0
821	WBGene00001035	3.49587	3.07063	3.45775	3.56838	2.66337	2.5655	2.993	3.346	4	4	3.39816	2.89197	0.223123	0.353642	1.22155	1.05645	0.0677147	0.120351	0.308208	0.346143	0.0970187	0.115476	-2.18432	24	1.26131	-2.18934	24	1.41668	0.0389412	0.0385322	-1.17503	0.0681406	0	0	0	0	0	0	0			0
822	WBGene00001036	4.132	3.525	4.116	4.218	3.653	3.368	3.656	3.911	4	4	3.99775	3.647	0.318334	0.221851	1.38322	1.29251	0.082926	0.0611534	0.289977	0.328245	0.0843759	0.0908037	-1.60165	24	1.28135	-1.46366	24	1.15817	0.122315	0.156261	-1.09617	0.144394	0	1	0	1	0	0	0			0
823	WBGene00001037	4.91317	4.72167	4.447	4.698	4.49183	4.27767	4.1615	4.28267	4	4	4.69496	4.30342	0.191329	0.137519	1.54586	1.45903	0.0409835	0.0317258	0.205493	0.281324	0.0420624	0.0595776	-2.24777	24	1.87422	-2.38124	24	2.00622	0.0340498	0.0255355	-1.09098	0.061916	0	0	0	1	0	0	0			0
824	WBGene00001038	5.508	5.534	5.657	5.385	6.088	5.555	5.526	5.581	4	4	5.521	5.6875	0.11155	0.267943	1.70841	1.73746	0.0202094	0.0460826	0.154199	0.255698	0.0276131	0.0436336	1.11523	24	2.74974	1.12542	24	2.49697	0.275797	0.271539	1.03016	0.241368	0	0	0	0	0	0	0			0
825	WBGene00001039	4.659	4.81	5.081	4.958	4.526	4.502	4.941	4.956	4	4	4.877	4.73125	0.182748	0.251125	1.584	1.55313	0.0375586	0.0531191	0.203969	0.27079	0.0418213	0.0572019	-0.859846	24	1.76252	-0.871311	24	1.8708	0.398382	0.392217	-1.03081	0.298857	0	0	1	0	0	0	0			0
826	WBGene00001040	4.504	3.703	4.598	4.703	3.234	2.608	3.302	3.456	4	4	4.377	3.15	0.456626	0.373077	1.47198	1.14174	0.109986	0.12521	0.32057	0.34068	0.0729022	0.1112	-5.24594	24	1.12939	-4.96735	24	2.32665	2.23e-05	4.52e-05	-1.38952	0.000361677	0	0	0	0	0	0	0	enriched in other tissue		0
827	WBGene00001041	5.568	5.347	5.369	5.467	4.593	4.317	4.444	4.741	4	4	5.43775	4.52375	0.101296	0.183574	1.69324	1.50872	0.0185665	0.0405557	0.172393	0.277235	0.0300337	0.0611471	-5.5994	24	2.58614	-5.41687	24	4.14509	9.19e-06	1.45e-05	-1.20204	0.000194719	0	0	0	0	0	0	0	enriched in other tissue		0
828	WBGene00001042	2.475	3.556	3.024	3.04	3.81	4.339	3.922	3.911	4	4	3.02375	3.9955	0.441468	0.234482	1.09833	1.38392	0.148497	0.0573223	0.413738	0.282374	0.138093	0.0785365	3.87991	24	2.14685	3.59539	24	3.09171	0.000713331	0.00145417	1.32137	0.00420111	1	0	0	0	0	0	0		175745	0
829	WBGene00001043	4.93056	4.68444	4.79931	4.82194	4.0785	4.138	4.27975	4.47037	4	4	4.80906	4.24166	0.10092	0.174287	1.57034	1.44433	0.0210008	0.0407728	0.181759	0.265621	0.0380455	0.0631697	-3.52585	24	2.13565	-3.41759	24	2.75684	0.00172818	0.00225779	-1.13377	0.00774344	0	0	0	0	0	0	0			0
830	WBGene00001044	4.0595	3.682	4.2035	4.364	2.9955	2.288	3.132	3.4335	4	4	4.07725	2.96225	0.291377	0.485321	1.40346	1.07501	0.0729157	0.174404	0.35668	0.401482	0.0753735	0.146842	-4.15241	24	1.267	-3.97978	24	3.79547	0.000358239	0.000554526	-1.3764	0.00259657	0	0	0	0	0	0	0			0
831	WBGene00001045	3.98022	4.15315	3.36267	3.60344	4.07107	3.78985	3.57144	3.65526	4	4	3.77487	3.77191	0.358033	0.218796	1.32496	1.32634	0.0955869	0.0571875	0.34653	0.311839	0.08874	0.0814168	-0.0127118	24	1.23487	0.0230098	24	1.18799	0.989963	0.981833	-1.00079	0.493409	0	0	0	0	0	0	0			0
832	WBGene00001046	3.59538	3.3365	3.63112	3.7965	2.92575	2.78713	3.161	3.41288	4	4	3.58988	3.07169	0.190285	0.274869	1.27705	1.11925	0.053596	0.0888828	0.29331	0.351525	0.0849256	0.114114	-2.26371	24	1.43635	-2.21862	24	1.80552	0.032912	0.0362233	-1.1687	0.0604298	0	0	0	0	0	0	0			0
833	WBGene00001047	5.50073	5.48014	5.30132	5.38905	5.60677	5.42155	5.25568	5.311	4	4	5.41781	5.39875	0.0915744	0.154878	1.68958	1.68586	0.0169537	0.0284997	0.160846	0.249151	0.029476	0.0473723	-0.128519	24	2.39941	-0.133419	24	2.58293	0.898809	0.894974	-1.00353	0.46881	0	0	0	0	0	0	0			0
834	WBGene00001048	5.197	5.063	5.255	5.38	4	3.927	4.394	4.641	4	4	5.22375	4.2405	0.131589	0.336692	1.65298	1.44233	0.0252145	0.0789416	0.180804	0.305762	0.0355401	0.0709297	-5.53603	24	2.85989	-5.31016	24	3.98308	1.08e-05	1.9e-05	-1.23187	0.000216718	0	0	0	0	0	0	0	enriched in other tissue		0
835	WBGene00001049	4.63433	4.306	4.49243	4.55623	3.8294	3.55597	3.94753	4.1765	4	4	4.49725	3.87735	0.140084	0.258201	1.5031	1.35347	0.0314137	0.0670216	0.193036	0.301075	0.0422596	0.0773555	-3.46657	24	2.4326	-3.39489	24	3.35067	0.00200101	0.00238739	-1.15988	0.00855798	0	0	0	0	0	0	0			0
836	WBGene00001050	3.56	3.3665	4.0095	4.0275	3.3095	3.045	3.7425	3.7535	4	4	3.74087	3.46263	0.330245	0.346793	1.31636	1.23819	0.0890679	0.101741	0.327399	0.356228	0.0829963	0.100763	-1.1502	24	1.18387	-1.19771	24	1.47394	0.261392	0.242725	-1.08036	0.233521	0	0	0	0	0	0	0			0
837	WBGene00001051	5.267	5.458	5.629	5.731	5.299	4.789	5.275	5.341	4	4	5.52125	5.176	0.20351	0.259438	1.70809	1.64306	0.0370494	0.0514148	0.176155	0.260725	0.0320008	0.0508521	-2.19446	24	2.19066	-2.16478	24	2.52519	0.038119	0.0405708	-1.0667	0.0671119	0	0	0	1	0	0	0			0
838	WBGene00001052	2.997	3.409	3.222	3.021	3.844	3.547	3.607	3.731	4	4	3.16225	3.68225	0.192972	0.132281	1.14991	1.30304	0.0604342	0.0358091	0.298437	0.278194	0.114375	0.0805682	2.54908	24	1.15082	2.18918	24	2.01528	0.0176126	0.038545	1.16444	0.0393008	0	0	1	0	0	0	0			0
839	WBGene00001053	2.54029	2.9331	2.93633	2.77976	2.57324	2.90786	2.67005	2.7391	4	4	2.79737	2.72256	0.18631	0.141024	1.02697	1.00058	0.06811	0.0514109	0.298987	0.308354	0.107333	0.127124	-0.348351	24	1.06365	-0.317223	24	1.40276	0.730613	0.753818	-1.02748	0.42166	0	0	0	0	0	0	0			0
840	WBGene00001054	2.64515	3.35945	2.95685	2.77895	3.90825	4.4535	4.00105	3.792	4	4	2.9351	4.0387	0.310376	0.289456	1.07268	1.39406	0.103329	0.0699595	0.359636	0.319111	0.120139	0.0791563	4.59068	24	1.27012	4.46762	24	2.30354	0.000117594	0.000160825	1.376	0.00119003	1	1	1	0	0	0	0		180042	0
841	WBGene00001055	3.38007	3.487	3.5516	3.52353	4.07	3.5724	3.6772	3.783	4	4	3.48555	3.77565	0.0751314	0.214242	1.24845	1.32739	0.0217124	0.0559576	0.322508	0.320207	0.080316	0.0798932	1.27665	24	1.01442	1.3936	24	1.01061	0.213941	0.176209	1.08323	0.2059	0	0	0	0	0	0	0			0
842	WBGene00001056	5.32037	5.09842	5.27542	5.32221	4.74458	4.52879	4.85947	5.006	4	4	5.25411	4.78471	0.106021	0.201382	1.65886	1.56476	0.0203632	0.0423298	0.162372	0.223793	0.0322458	0.0469322	-3.39535	24	1.89963	-3.30507	24	2.11834	0.00238468	0.00297488	-1.0981	0.00969204	0	0	0	0	0	0	0			0
843	WBGene00001057	4.44565	4.19341	4.26847	4.37153	3.99571	3.87106	3.95235	4.10894	4	4	4.31976	3.98201	0.111239	0.0991443	1.46295	1.38156	0.0257599	0.024837	0.224188	0.24512	0.0464511	0.068303	-2.03353	24	1.19546	-1.97081	24	2.16215	0.0531982	0.0603843	-1.08482	0.0838546	0	0	0	0	0	0	0			0
844	WBGene00001058	5.23005	5.03291	4.85318	5.05418	4.89418	4.62441	4.52595	4.67509	4	4	5.04258	4.67991	0.154103	0.15569	1.61757	1.54287	0.0305859	0.0329941	0.174103	0.258307	0.0350741	0.0530317	-2.32852	24	2.20119	-2.34972	24	2.28612	0.0286338	0.0273486	-1.0775	0.0550307	0	0	0	0	0	0	0			0
845	WBGene00001059	2.30868	3.01305	2.87563	2.78416	2.29258	2.83768	2.75947	2.90521	4	4	2.74538	2.69874	0.305953	0.277243	1.00496	0.988553	0.116783	0.107986	0.355009	0.336239	0.128989	0.119314	-0.190789	24	1.11476	-0.186779	24	1.16875	0.850295	0.853404	-1.01728	0.455638	0	0	0	0	0	0	0			0
846	WBGene00001060	4.23488	3.86488	4.12612	4.19894	2.98735	2.74141	3.24806	3.47188	4	4	4.10621	3.11218	0.167124	0.316702	1.41186	1.1314	0.0413971	0.10246	0.284402	0.33916	0.0625405	0.107093	-4.49155	24	1.42214	-4.52292	24	2.93227	0.000151327	0.000139719	-1.3194	0.00142084	0	0	0	0	0	0	0			0
847	WBGene00001061	4.58633	4.09989	4.637	4.83633	3.88589	3.57878	4.227	4.61544	4	4	4.53989	4.07678	0.312552	0.446158	1.51107	1.40082	0.070549	0.109398	0.244628	0.3361	0.0582279	0.0812818	-2.2281	24	1.88766	-2.20526	24	1.94861	0.0355027	0.0372607	-1.1136	0.0636086	0	0	0	0	0	0	0			0
848	WBGene00001062	1.396	1.209	1.392	1.392	1.163	0.812	0.762	0.571	4	4	1.34725	0.827	0.092186	0.246902	0.296222	-0.222357	0.0709651	0.292285	0.209139	0.230579	0.149825	0.337941	-3.34247	24	1.21553	-2.80568	24	5.0876	0.00271496	0.00979906	-1.62908	0.0106597	0	0	0	0	0	0	0			0
849	WBGene00001063	2.38445	3.04994	2.1276	2.26389	2.36864	3.08502	2.03102	2.27217	4	4	2.45647	2.43921	0.409322	0.453348	0.889042	0.879537	0.157757	0.177026	0.319293	0.358306	0.137086	0.150607	-0.0719078	24	1.2593	-0.0933412	24	1.20698	0.943271	0.926407	-1.00707	0.481694	0	0	0	0	0	0	0			0
850	WBGene00001064	3.0425	4.135	3.1345	3.0955	2.867	3.544	2.906	2.926	4	4	3.35188	3.06075	0.523443	0.323097	1.20115	1.11473	0.146072	0.100704	0.401564	0.382442	0.116832	0.107286	-1.04997	24	1.1025	-1.08956	24	1.18587	0.304191	0.286726	-1.09512	0.256016	0	0	1	1	0	0	0			0
851	WBGene00001065	4.202	4.937	4.244	3.809	4.33	4.92	4.36	4.271	4	4	4.298	4.47025	0.46889	0.302104	1.4538	1.4958	0.107075	0.065569	0.316404	0.314508	0.0738187	0.0611063	0.772207	24	1.01209	0.876587	24	1.45936	0.44753	0.389401	1.04008	0.319818	0	0	1	1	0	0	0			0
852	WBGene00001066	4.087	4.557	4.385	3.535	4.398	4.963	4.488	3.846	4	4	4.141	4.42375	0.448235	0.458031	1.41634	1.4829	0.111899	0.104869	0.351458	0.341858	0.0834706	0.0797448	1.15339	24	1.05695	1.15307	24	1.09562	0.260109	0.260237	1.06828	0.232845	0	0	1	1	0	0	0			0
853	WBGene00001067	3.238	5.083	4.906	3.876	3.592	5.158	5.029	3.446	4	4	4.27575	4.30625	0.872848	0.912511	1.43653	1.44292	0.211862	0.214496	0.488202	0.532303	0.120319	0.121618	0.0844548	24	1.18883	0.0747415	24	1.02171	0.933395	0.94104	1.00713	0.479038	0	0	0	1	0	0	0			0
854	WBGene00001068	2.09769	2.67372	2.10993	2.19796	2.13819	2.7718	2.05746	2.33507	4	4	2.26982	2.32563	0.272945	0.31948	0.814622	0.837243	0.114468	0.13255	0.314138	0.327746	0.129464	0.124632	0.245849	24	1.08851	0.251747	24	1.07904	0.80789	0.80338	1.02459	0.444275	0	0	0	0	0	0	0			0
855	WBGene00001069	3.284	4.213	2.962	2.906	3.86	4.469	3.435	3.121	4	4	3.34125	3.72125	0.604566	0.583273	1.19497	1.305	0.170803	0.1548	0.436649	0.435397	0.130392	0.112585	1.23251	24	1.00576	1.27741	24	1.34134	0.229698	0.213676	1.11373	0.215317	0	0	1	1	0	0	0			0
856	WBGene00001070	2.73462	3.58175	3.0785	2.719	2.79425	3.58225	3.02813	2.70475	4	4	3.02847	3.02734	0.40445	0.394259	1.10164	1.10163	0.129479	0.125559	0.390313	0.365879	0.12951	0.127878	-0.0042057	24	1.13802	-0.00012231	24	1.0257	0.996679	0.999903	-1.00037	0.494742	0	0	0	0	0	0	0			0
857	WBGene00001071	2.832	4.006	3.723	2.988	2.943	3.661	3.336	2.976	4	4	3.38725	3.229	0.566652	0.338565	1.20948	1.16813	0.167749	0.103315	0.410971	0.369087	0.127338	0.10985	-0.572976	24	1.23984	-0.491733	24	1.34376	0.571991	0.627375	-1.04901	0.368732	0	0	0	0	0	0	0			0
858	WBGene00001072	3.491	4.17433	3.572	3.324	3.282	3.71133	3.14433	3.21267	4	4	3.64033	3.33758	0.370672	0.255427	1.28836	1.20314	0.098418	0.0742596	0.34627	0.321301	0.0911298	0.0977742	-1.28182	24	1.16147	-1.27523	24	1.15114	0.21215	0.214433	-1.09071	0.204743	0	0	0	0	0	0	0			0
859	WBGene00001073	4.845	4.148	4.967	5.073	4.672	4.616	4.818	5.061	4	4	4.75825	4.79175	0.417363	0.198673	1.55683	1.56626	0.0914221	0.0410434	0.270977	0.226947	0.0601106	0.047177	0.189555	24	1.42566	0.246796	24	1.62346	0.851252	0.807165	1.00704	0.455791	0	0	0	1	0	0	0			0
860	WBGene00001074	4.474	5.033	4.953	4.381	4.828	5.451	5.182	4.831	4	4	4.71025	5.073	0.33031	0.301858	1.54789	1.62262	0.0702448	0.0590177	0.232692	0.272913	0.0484435	0.0551637	2.02289	24	1.37558	2.03572	24	1.29669	0.0543615	0.0529618	1.07701	0.08507	0	0	0	1	0	0	0			0
861	WBGene00001075	4.85	5.711	3.643	4.554	4.789	5.256	3.484	4.251	4	4	4.6895	4.445	0.852984	0.760967	1.53255	1.48026	0.186136	0.17743	0.464308	0.446716	0.10185	0.10585	-0.75895	24	1.08031	-0.711941	24	1.08008	0.455272	0.483365	-1.05501	0.323216	0	0	1	0	0	0	0			0
862	WBGene00001076	4.46833	5.335	3.78667	4.623	4.82867	5.67233	3.917	4.79433	4	4	4.55325	4.80308	0.635311	0.716815	1.50846	1.56073	0.140783	0.151656	0.378094	0.420707	0.0830579	0.0889335	0.883363	24	1.23811	0.859159	24	1.14649	0.385803	0.398753	1.05487	0.293448	0	0	0	1	0	0	0			0
863	WBGene00001077	3.52964	4.14309	3.82945	3.59336	4.01182	4.17882	4.11645	3.98009	4	4	3.77389	4.0718	0.277877	0.0921146	1.32611	1.40389	0.0725469	0.022591	0.326545	0.246088	0.0802857	0.0605456	1.45716	24	1.76078	1.547	24	1.75837	0.158033	0.134948	1.07894	0.169983	0	0	1	0	0	0	0			0
864	WBGene00001078	2.99025	2.969	2.89858	3.104	2.36017	2.50317	2.43842	2.74267	4	4	2.99046	2.5111	0.0852315	0.165076	1.09512	0.919142	0.0283661	0.0645144	0.324304	0.29014	0.120104	0.12497	-2.20318	24	1.24936	-2.03063	24	1.08267	0.0374252	0.0535137	-1.19089	0.0661742	0	1	1	0	0	0	0			0
865	WBGene00001079	1.8	2.1145	1.82	1.8175	1.552	1.574	1.471	1.591	4	4	1.888	1.547	0.151262	0.0531225	0.633226	0.435867	0.0772184	0.0348002	0.241186	0.205167	0.130422	0.14428	-2.15383	24	1.38194	-2.02949	24	1.2238	0.041511	0.0536379	-1.22043	0.0711354	0	1	0	0	0	0	0			0
866	WBGene00001080	4.10823	4.03277	4.03749	4.07185	4.08341	4.51086	4.27409	4.37081	4	4	4.06259	4.30979	0.0350644	0.179517	1.40179	1.46024	0.0086159	0.0418565	0.262802	0.290714	0.0631639	0.0636029	1.26161	24	1.22369	1.30398	24	1.01395	0.219215	0.20461	1.06085	0.209035	0	0	0	0	0	0	0			0
867	WBGene00001081	4.13304	4.13558	3.85767	3.86778	4.37465	4.60334	4.40953	4.46161	4	4	3.99852	4.46228	0.156857	0.100596	1.38535	1.49547	0.0392453	0.0223845	0.260214	0.260687	0.0801142	0.0522299	2.51819	24	1.00364	2.30302	24	2.35278	0.0188731	0.0302528	1.11598	0.0411957	0	0	1	0	0	0	0			0
868	WBGene00001082	4.363	3.96	3.993	3.9	4.358	4.328	4.03	4.056	4	4	4.054	4.193	0.209566	0.173962	1.39873	1.43277	0.0505702	0.0415046	0.297203	0.274105	0.072302	0.0683619	0.687598	24	1.17564	0.684194	24	1.11859	0.498298	0.500407	1.03429	0.340817	0	0	0	0	0	0	0			0
869	WBGene00001085	4.68416	4.3538	4.52158	4.54251	3.82207	3.90955	4.07273	4.34909	4	4	4.52551	4.03836	0.135351	0.231738	1.50939	1.39462	0.0299883	0.0566916	0.187109	0.303496	0.047524	0.0767713	-2.73269	24	2.63096	-2.54226	24	2.60958	0.0116017	0.0178838	-1.12063	0.0294649	0	0	0	0	0	0	0			0
870	WBGene00001086	3.89736	3.98945	3.44184	3.63246	3.54372	4.00769	3.72194	3.9819	4	4	3.74028	3.81381	0.249968	0.221534	1.31747	1.33735	0.0673561	0.0586008	0.301765	0.28143	0.0763303	0.0835564	0.356412	24	1.14973	0.351347	24	1.1983	0.724646	0.728394	1.01966	0.419795	0	0	0	0	0	0	0			0
871	WBGene00001087	4.70714	4.39665	4.34256	4.35343	4.44997	4.10133	3.97698	3.99529	4	4	4.44994	4.13089	0.17305	0.219666	1.49234	1.41746	0.0382047	0.0520865	0.209548	0.298131	0.0414584	0.0693834	-1.75107	24	2.02418	-1.85276	24	2.80083	0.0927068	0.0762534	-1.07724	0.120975	0	0	0	0	0	0	0			0
872	WBGene00001088	5.352	4.881	4.92	4.953	4.918	4.258	4.729	4.656	4	4	5.0265	4.64025	0.218986	0.27772	1.61403	1.53339	0.0427146	0.0609179	0.195765	0.285636	0.0380824	0.0571289	-2.23083	24	2.1289	-2.34895	24	2.25042	0.0352977	0.0273944	-1.08324	0.0633592	0	0	0	1	0	0	0			0
873	WBGene00001089	3.03306	3.52852	3.05597	3.08226	3.36158	3.86471	3.32055	3.32761	4	4	3.17495	3.46861	0.236565	0.264671	1.1533	1.24167	0.0720172	0.0736724	0.345483	0.331659	0.109911	0.0858691	1.22637	24	1.0851	1.26714	24	1.63834	0.231956	0.217264	1.09249	0.216626	0	0	0	0	0	0	0			0
874	WBGene00001090	3.41135	3.29119	3.51838	3.588	2.94819	3.05323	3.37796	3.42062	4	4	3.45223	3.2	0.129634	0.234727	1.23849	1.16112	0.037732	0.0736638	0.307729	0.356457	0.0897696	0.100648	-1.07124	24	1.34177	-1.14732	24	1.25706	0.294716	0.262557	-1.07882	0.251023	0	1	0	0	0	0	0			0
875	WBGene00001092	4.564	3.849	4.461	4.463	3.485	3.053	3.873	4.171	4	4	4.33425	3.6455	0.327055	0.484673	1.4643	1.28669	0.0783866	0.135524	0.267804	0.390486	0.0610851	0.108958	-2.90921	24	2.12606	-2.84369	24	3.18164	0.00769172	0.00896865	-1.18893	0.0221189	0	0	0	0	0	0	0			0
876	WBGene00001093	4.84405	4.44405	4.41865	4.6508	4.2475	4.0173	4.1521	4.2835	4	4	4.58939	4.1751	0.19908	0.118915	1.52305	1.42883	0.0430665	0.0286772	0.220627	0.265057	0.0444812	0.0629506	-2.40261	24	1.44331	-2.44463	24	2.00285	0.0243703	0.0222199	-1.09923	0.0489798	0	0	0	0	0	0	0			0
877	WBGene00001094	5.338	5.20233	5.07342	5.16717	4.9305	4.76217	4.70167	4.82392	4	4	5.19523	4.80456	0.109635	0.0976726	1.64757	1.56941	0.0210475	0.0202714	0.16181	0.224826	0.0323085	0.0474798	-2.8207	24	1.93056	-2.72203	24	2.15965	0.00946258	0.0118898	-1.08131	0.0256633	0	0	0	0	0	0	0			0
878	WBGene00001095	4.1779	3.8209	4.1504	4.2055	3.3723	3.2527	3.6621	3.792	4	4	4.08868	3.51978	0.179928	0.249961	1.40747	1.2565	0.0449815	0.0711003	0.343155	0.338251	0.0706406	0.0881961	-2.36137	24	1.02921	-2.67208	24	1.5588	0.0266653	0.0133318	-1.16163	0.0522051	0	0	0	0	0	0	0			0
879	WBGene00001096	2.033	2.129	1.969	1.81	2.025	2.722	2.559	2.451	4	4	1.98525	2.43925	0.134066	0.297786	0.684004	0.885762	0.0684312	0.127605	0.271235	0.311151	0.127181	0.136221	2.19975	24	1.31598	2.16521	24	1.14722	0.0376968	0.0405341	1.22869	0.0665376	0	0	0	0	0	0	0			0
880	WBGene00001099	4.05707	4.35228	4.57548	4.07203	3.6419	3.67186	4.29266	4.13634	4	4	4.26422	3.93569	0.247982	0.328434	1.449	1.36748	0.0576822	0.0832999	0.281064	0.345519	0.0601555	0.0835099	-1.4752	24	1.51124	-1.5842	24	1.92719	0.153159	0.126237	-1.08347	0.166664	0	0	0	0	0	0	0			0
881	WBGene00001101	3.09156	3.38	2.90587	2.99006	3.42638	3.79844	3.40881	3.41225	4	4	3.09187	3.51147	0.206541	0.191463	1.12715	1.25496	0.0655701	0.053135	0.315104	0.328156	0.112958	0.0847429	1.84458	24	1.08456	1.81021	24	1.77676	0.0774764	0.0828033	1.13571	0.108197	0	0	1	0	0	0	0			0
882	WBGene00001102	4.54041	4.11882	4.37282	4.49124	3.50024	3.07976	3.686	3.99571	4	4	4.38082	3.56543	0.188297	0.382882	1.47653	1.26686	0.0436053	0.109227	0.247312	0.34168	0.0541326	0.100755	-3.86635	24	1.90875	-3.6663	24	3.46432	0.000738093	0.00121869	-1.2287	0.00430218	0	0	0	0	0	0	0			0
883	WBGene00001103	2.832	2.397	2.092	2.594	2.445	1.941	2.283	2.321	4	4	2.47875	2.2475	0.313223	0.215724	0.901631	0.806184	0.128537	0.0996969	0.326538	0.292005	0.124708	0.115089	-1.0558	24	1.2505	-1.12489	24	1.17414	0.301573	0.271758	-1.10289	0.254643	0	0	0	0	0	0	0			0
884	WBGene00001104	4.368	3.839	3.605	4.04	3.564	2.917	3.331	3.616	4	4	3.963	3.357	0.323262	0.318437	1.37452	1.20752	0.0812169	0.098069	0.313134	0.342284	0.0849665	0.106129	-2.61258	24	1.19485	-2.45678	24	1.56017	0.0152637	0.0216316	-1.18052	0.035657	0	0	0	0	0	0	0			0
885	WBGene00001105	3.55	3.869	2.938	3.247	3.306	2.993	2.642	2.816	4	4	3.401	2.93925	0.399712	0.283398	1.21885	1.07472	0.118201	0.0954109	0.347078	0.344728	0.106651	0.126438	-1.88784	24	1.01368	-1.74273	24	1.40549	0.0711969	0.0941824	-1.1571	0.102063	0	0	0	0	0	0	0			0
886	WBGene00001106	2.274	2.504	2.636	2.353	2.741	2.608	2.696	2.526	4	4	2.44175	2.64275	0.160857	0.0954406	0.891096	0.971328	0.0656237	0.0362683	0.271563	0.280975	0.118392	0.115683	1.02877	24	1.07052	0.969416	24	1.04738	0.313847	0.342006	1.08232	0.26035	0	0	0	0	0	0	0			0
887	WBGene00001107	2.756	2.317	2.333	2.493	2.389	2.478	1.806	2.576	4	4	2.47475	2.31225	0.203644	0.346033	0.903674	0.82892	0.0804855	0.161496	0.295108	0.327035	0.114474	0.146342	-0.737798	24	1.22808	-0.804689	24	1.63428	0.46779	0.428899	-1.07028	0.328578	0	0	0	0	0	0	0			0
888	WBGene00001108	2.786	3.758	2.371	2.723	2.612	2.787	2.603	2.696	4	4	2.9095	2.6745	0.59441	0.0859011	1.05338	0.983379	0.193903	0.0319096	0.447148	0.325839	0.152024	0.106101	-0.849488	24	1.8832	-0.755237	24	2.05296	0.404005	0.457455	-1.08787	0.301591	0	0	1	0	0	0	0			0
889	WBGene00001109	1.812	2.438	2.035	2.435	1.829	2.065	1.614	1.831	4	4	2.18	1.83475	0.309859	0.184203	0.771513	0.603119	0.145404	0.100609	0.316537	0.247734	0.140284	0.140885	-1.71785	24	1.63258	-1.69396	24	1.00858	0.098701	0.103214	-1.18817	0.126124	0	0	0	0	0	0	0			0
890	WBGene00001110	4.20754	3.95554	4.00904	4.31546	3.20196	3.03042	3.52246	3.91829	4	4	4.1219	3.41828	0.168534	0.390768	1.41569	1.22432	0.0408046	0.112879	0.285063	0.376402	0.0640238	0.102782	-2.98038	24	1.74349	-3.16073	24	2.57719	0.00650162	0.00422303	-1.20584	0.0196731	0	0	0	0	0	0	0			0
891	WBGene00001111	2.11136	1.98445	1.97209	2.16191	1.65255	1.79364	1.797	1.89055	4	4	2.05745	1.78343	0.0938667	0.0981373	0.720691	0.577386	0.0455327	0.0556671	0.233766	0.237791	0.121262	0.134646	-1.64355	24	1.03473	-1.58171	24	1.23293	0.113308	0.126806	-1.15365	0.137977	0	0	0	0	0	0	0			0
892	WBGene00001112	4.49734	4.014	4.36437	4.36856	3.56891	3.37491	3.79188	3.97694	4	4	4.31107	3.67816	0.207441	0.262106	1.4603	1.3005	0.0490251	0.0714725	0.255412	0.309583	0.0518588	0.0909046	-3.15397	24	1.46917	-3.05373	24	3.07275	0.00429247	0.0054601	-1.17207	0.0146766	0	0	0	0	0	0	0			0
893	WBGene00001113	2.505	3.364	2.872	2.795	4.577	5.663	4.832	4.396	4	4	2.884	4.867	0.356887	0.559995	1.05357	1.57774	0.12169	0.111117	0.372581	0.39017	0.131636	0.0795186	7.35139	24	1.09664	6.81675	24	2.7404	1.36e-07	4.74e-07	1.68759	8.41e-06	1	1	0	1	0	0	0	muscle-enriched	177846	0
894	WBGene00001115	3.22075	3.96037	3.15462	3.06925	4.58925	4.64163	4.17112	4.041	4	4	3.35125	4.36075	0.410791	0.299611	1.20406	1.47086	0.116533	0.068963	0.362027	0.306646	0.107496	0.0704243	4.25553	24	1.39382	4.1522	24	2.32991	0.000275758	0.000358432	1.30123	0.00214941	1	0	0	0	0	0	0		171715	0
895	WBGene00001116	2.82379	3.50646	3.09475	2.809	4.43225	4.76283	4.56787	4.36163	4	4	3.0585	4.53115	0.326251	0.176584	1.11381	1.51041	0.103874	0.0386936	0.364793	0.273968	0.117947	0.0659121	6.45592	24	1.77293	5.87066	24	3.20215	1.12e-06	4.69e-06	1.48149	3.91e-05	1	1	1	0	0	0	0		181515	0
896	WBGene00001117	2.5496	3.2594	2.5894	2.5896	2.347	2.6004	2.4798	2.191	4	4	2.747	2.40455	0.342117	0.176007	1.0051	0.875335	0.117855	0.0737137	0.363769	0.284309	0.12866	0.119211	-1.48346	24	1.63708	-1.47969	24	1.1648	0.150968	0.151963	-1.14242	0.165125	0	0	0	0	0	0	0			0
897	WBGene00001118	2.50161	2.95271	2.59398	2.52682	2.0769	2.44559	2.19378	2.3509	4	4	2.64378	2.26679	0.209613	0.163742	0.969953	0.816396	0.0767195	0.0725773	0.331924	0.269571	0.120027	0.115469	-1.76328	24	1.51611	-1.84396	24	1.08049	0.0905833	0.0775704	-1.16631	0.119007	0	0	0	0	0	0	0			0
898	WBGene00001119	1.832	1.942	1.846	1.705	1.919	1.696	1.594	1.886	4	4	1.83125	1.77375	0.0973358	0.154976	0.603928	0.570195	0.0535746	0.0882281	0.225282	0.236327	0.125776	0.142997	-0.35222	24	1.10046	-0.35426	24	1.29258	0.727748	0.726238	-1.03242	0.42078	0	0	0	0	0	0	0			0
899	WBGene00001121	2.4725	2.8855	2.3855	2.3245	2.1815	2.5295	2.155	2.3335	4	4	2.517	2.29988	0.253062	0.172104	0.91946	0.830799	0.0968565	0.0736571	0.288539	0.289882	0.125605	0.121753	-1.06172	24	1.00933	-1.01368	24	1.06427	0.29893	0.320845	-1.09441	0.253219	0	0	0	0	0	0	0			0
900	WBGene00001122	2.345	2.741	2.357	2.344	1.986	2.141	2.421	2.306	4	4	2.44675	2.2135	0.196256	0.190285	0.892464	0.791773	0.07728	0.0866886	0.270796	0.292291	0.123978	0.13528	-1.17078	24	1.16506	-1.09747	24	1.19064	0.253182	0.283325	-1.10538	0.228925	0	0	0	0	0	0	0			0
901	WBGene00001123	2.42	3.687	2.413	2.882	2.265	2.749	1.953	2.371	4	4	2.8505	2.3345	0.599294	0.328387	1.03198	0.840373	0.199951	0.140812	0.438029	0.335821	0.144466	0.137656	-1.86974	24	1.70134	-1.92045	24	1.10138	0.0737676	0.0667603	-1.22103	0.104483	0	0	0	0	0	0	0			0
902	WBGene00001127	2.44875	2.8205	2.3545	2.16662	2.16887	2.73425	2.09362	2.261	4	4	2.44759	2.31444	0.274876	0.288123	0.890498	0.833692	0.110147	0.119003	0.280862	0.297455	0.124981	0.12228	-0.650971	24	1.12164	-0.64976	24	1.04467	0.52125	0.522018	-1.05753	0.349881	0	0	0	0	0	0	0			0
903	WBGene00001129	1.875	2.0495	1.67925	1.8715	1.773	1.82375	1.74025	1.67725	4	4	1.86881	1.75356	0.151248	0.0613865	0.622823	0.561188	0.0815391	0.0351124	0.266183	0.200265	0.133376	0.131803	-0.691972	24	1.76666	-0.657394	24	1.02401	0.495596	0.517183	-1.06572	0.339804	0	0	0	0	0	0	0			0
904	WBGene00001130	4.09419	3.99159	3.86937	4.18456	4.5193	4.42252	4.10915	4.40433	4	4	4.03493	4.36382	0.135631	0.177123	1.39456	1.47272	0.0337125	0.0412464	0.290862	0.290524	0.0679115	0.0623554	1.60008	24	1.00233	1.6954	24	1.18615	0.122663	0.102936	1.08151	0.144635	0	0	0	0	0	0	0			0
905	WBGene00001131	3.33963	4.07528	3.30234	3.31111	4.80941	5.26972	4.90755	4.73732	4	4	3.50709	4.931	0.379128	0.236343	1.25068	1.5947	0.102952	0.0471255	0.334065	0.302993	0.093252	0.0570774	6.3144	24	1.21561	6.29306	24	2.66925	1.58e-06	1.66e-06	1.40601	5.1e-05	1	1	1	0	0	0	0		173038	0
906	WBGene00001132	2.7323	3.48107	2.84895	2.71951	3.40065	4.41947	4.54393	4.48205	4	4	2.94546	4.21152	0.361792	0.542964	1.07497	1.43096	0.116797	0.138463	0.364837	0.389252	0.126549	0.093005	4.74625	24	1.13831	4.53349	24	1.85143	7.92e-05	0.00013601	1.42984	0.000905958	1	1	0	0	0	0	0		177701	0
907	WBGene00001133	1.7345	1.87733	1.79567	1.63083	1.61533	1.85283	1.553	1.67433	4	4	1.75958	1.67388	0.103879	0.129182	0.56376	0.512965	0.0593885	0.0756832	0.212585	0.216455	0.128305	0.126796	-0.565006	24	1.03674	-0.563171	24	1.02394	0.577313	0.578542	-1.0512	0.370815	0	0	0	0	0	0	0			0
908	WBGene00001134	4.76897	4.4322	4.53151	4.63277	4.34109	4.26417	4.28609	4.42586	4	4	4.59136	4.3293	0.143961	0.0720449	1.52381	1.4653	0.0312914	0.0165762	0.209629	0.261175	0.0425428	0.0618124	-1.56504	24	1.55224	-1.5594	24	2.11106	0.130665	0.131992	-1.06053	0.150557	0	0	0	0	0	0	0			0
909	WBGene00001135	2.23317	2.62183	2.42917	2.169	2.22333	2.44433	2.02533	2.18017	4	4	2.36329	2.21829	0.204829	0.173019	0.857277	0.794479	0.085772	0.0774223	0.2714	0.28852	0.12115	0.126232	-0.732123	24	1.13014	-0.71785	24	1.08566	0.471183	0.47978	-1.06537	0.330154	0	0	0	0	0	0	0			0
910	WBGene00001136	2.882	3.202	3.515	3.372	3.385	2.798	3.105	3.176	4	4	3.24275	3.116	0.272413	0.24304	1.1737	1.13422	0.0857639	0.0791593	0.353702	0.316734	0.115388	0.109647	-0.533921	24	1.24706	-0.496026	24	1.10747	0.598307	0.624388	-1.04068	0.377888	0	0	0	0	0	0	0			0
911	WBGene00001137	5.55156	5.52185	5.5201	5.52276	5.72439	5.74193	5.66339	5.69161	4	4	5.52907	5.70533	0.0150365	0.0348798	1.71002	1.74139	0.00271591	0.00611665	0.14118	0.201216	0.0251646	0.0350041	1.43417	24	2.03132	1.45533	24	1.93489	0.164425	0.158533	1.03188	0.174177	0	0	0	0	0	0	0			0
912	WBGene00001145	3.188	4.021	3.203	3.237	3.351	4.285	3.563	3.391	4	4	3.41225	3.6475	0.406351	0.434838	1.22241	1.28903	0.112924	0.113872	0.367889	0.375578	0.106472	0.104926	0.894931	24	1.04224	0.891221	24	1.02968	0.379712	0.381658	1.06894	0.290882	0	0	1	0	0	0	0			0
913	WBGene00001147	1.546	2.038	1.846	1.536	1.409	1.778	2.003	1.471	4	4	1.7415	1.66525	0.244461	0.276999	0.547461	0.499739	0.138862	0.164602	0.264034	0.246977	0.136444	0.158001	-0.421806	24	1.14289	-0.457185	24	1.34094	0.676921	0.651649	-1.04579	0.404589	0	0	0	0	0	0	0			0
914	WBGene00001148	4.32195	4.26821	3.91279	4.02137	3.91147	3.95011	3.91642	4.26889	4	4	4.13108	4.01172	0.195723	0.172304	1.41769	1.38855	0.0475231	0.0420987	0.300399	0.28602	0.0688243	0.0687299	-0.575504	24	1.10307	-0.599308	24	1.00275	0.570308	0.554584	-1.02975	0.368134	0	0	0	0	0	0	0			0
915	WBGene00001149	3.821	3.9655	4.1325	3.92	5.265	4.925	4.968	4.9285	4	4	3.95975	5.02163	0.130009	0.163417	1.37578	1.61336	0.0326545	0.0320544	0.271988	0.250276	0.0796008	0.0482783	5.74583	24	1.18103	5.10402	24	2.71851	6.39e-06	3.19e-05	1.26817	0.000147667	1	1	0	0	0	0	0		181423	0
916	WBGene00001150	3.08892	3.19042	3.00669	2.67923	2.85085	2.84638	2.76	2.60908	4	4	2.99132	2.76658	0.221212	0.113019	1.09359	1.01697	0.0760091	0.0414276	0.34903	0.328749	0.118757	0.100627	-0.93744	24	1.12718	-0.984389	24	1.39281	0.357871	0.334745	-1.08123	0.280714	0	0	1	0	0	0	0			0
917	WBGene00001151	5.006	4.871	5.203	5.409	3.877	3.72	4.493	4.941	4	4	5.12225	4.25775	0.234795	0.5646	1.63281	1.44222	0.0457011	0.1315	0.204347	0.379521	0.0417389	0.0885573	-4.01125	24	3.44933	-3.89355	24	4.50159	0.000512142	0.000689236	-1.20304	0.00334961	0	0	1	0	0	0	0			0
918	WBGene00001152	3.946	4.527	4.579	4.535	3.687	4.274	4.414	4.341	4	4	4.39675	4.179	0.301368	0.332945	1.47902	1.42756	0.0710539	0.0828844	0.252968	0.293832	0.0594813	0.0729018	-1.12322	24	1.34918	-1.09375	24	1.50216	0.272454	0.284923	-1.05211	0.239593	0	1	0	0	0	0	0			0
919	WBGene00001153	4.421	3.987	4.01625	4.14175	4.30125	3.81125	3.811	3.951	4	4	4.1415	3.96862	0.198056	0.231346	1.42022	1.37718	0.0470844	0.0570713	0.286994	0.274153	0.0698885	0.0702382	-0.871138	24	1.09587	-0.868694	24	1.01003	0.39231	0.393619	-1.04356	0.296002	0	1	1	0	0	0	0			0
920	WBGene00001154	3.369	2.994	3.194	2.824	3.502	3.004	3.381	3.031	4	4	3.09525	3.2295	0.237008	0.249974	1.12766	1.17009	0.0767389	0.0772591	0.340659	0.347902	0.110725	0.104925	0.551433	24	1.04298	0.556199	24	1.1136	0.586435	0.583224	1.04337	0.373545	0	0	0	0	0	0	0			0
921	WBGene00001155	5.769	5.665	5.818	5.823	5.948	5.587	5.689	5.766	4	4	5.76875	5.7475	0.073332	0.152452	1.75239	1.7485	0.0127703	0.0264114	0.130382	0.201087	0.0229177	0.0338579	-0.177337	24	2.37865	-0.190378	24	2.18262	0.860732	0.850614	-1.0037	0.458332	0	0	0	0	0	0	0			0
922	WBGene00001156	3.63	2.974	4.121	3.603	3.698	2.272	3.622	3.671	4	4	3.582	3.31575	0.470082	0.696544	1.26925	1.17899	0.134516	0.239038	0.361001	0.460989	0.105912	0.151834	-0.90945	24	1.63066	-0.975185	24	2.05518	0.372156	0.339196	-1.0803	0.287592	0	0	0	0	0	0	0			0
923	WBGene00001157	2.681	3.356	3.392	3.23	2.764	2.9935	3.292	3.476	4	4	3.16475	3.13137	0.329894	0.315458	1.14771	1.13762	0.109711	0.101564	0.334016	0.330102	0.123487	0.114672	-0.142139	24	1.02386	-0.119695	24	1.15967	0.888157	0.905721	-1.01066	0.466118	0	0	0	0	0	0	0			0
924	WBGene00001158	3.715	3.981	3.761	2.925	3.81	4.1	3.513	2.966	4	4	3.5955	3.59725	0.461826	0.484285	1.27297	1.27308	0.136484	0.139053	0.364269	0.38949	0.114422	0.110455	0.00656307	24	1.14327	0.00128806	24	1.07312	0.994818	0.998983	1.00049	0.494384	0	0	0	0	0	0	0			0
925	WBGene00001159	2.64409	3.06155	2.58064	2.56745	2.67964	3.17591	2.44	2.70645	4	4	2.71343	2.7505	0.234475	0.307866	0.99555	1.00723	0.0832415	0.109375	0.368759	0.338076	0.117465	0.120984	0.14819	24	1.18975	0.138514	24	1.06082	0.883431	0.89099	1.01366	0.464881	0	0	1	0	0	0	0			0
926	WBGene00001160	3.98735	4.04962	4.1865	4.14504	4.14915	4.47512	4.15331	4.06273	4	4	4.09213	4.21008	0.0903551	0.181559	1.40888	1.4368	0.0221107	0.0423924	0.296399	0.293434	0.0635405	0.0665207	0.565608	24	1.02031	0.60697	24	1.096	0.576911	0.54957	1.02882	0.370696	0	0	0	0	0	0	0			0
927	WBGene00001161	5.779	5.407	5.435	5.626	4.823	4.176	4.872	5.216	4	4	5.56175	4.77175	0.174489	0.433956	1.71555	1.5595	0.0312377	0.093477	0.158078	0.312594	0.0282786	0.0671893	-4.51054	24	3.91037	-4.28132	24	5.64528	0.000144188	0.000258269	-1.16556	0.00137597	0	0	0	0	0	0	0			0
928	WBGene00001162	4.03	3.99433	4.13967	4.20933	4.194	4.04233	4.15167	4.05767	4	4	4.09333	4.11142	0.09902	0.0732613	1.40914	1.41365	0.0241521	0.0178015	0.287471	0.259772	0.0648024	0.0611988	0.0933446	24	1.22463	0.101155	24	1.12123	0.926405	0.920268	1.00442	0.477055	0	0	0	0	0	0	0			0
929	WBGene00001163	3.253	4.482	3.35	3.641	2.976	3.97	3.386	3.571	4	4	3.6815	3.47575	0.558553	0.41278	1.29522	1.24046	0.144667	0.119826	0.398601	0.358078	0.103125	0.0961488	-0.767983	24	1.23914	-0.776714	24	1.15038	0.449988	0.444916	-1.0592	0.320795	0	0	1	0	0	0	0			0
930	WBGene00001164	3.379	3.055	3.766	3.723	3.754	2.879	3.641	3.106	4	4	3.48075	3.345	0.3325	0.41999	1.24373	1.20146	0.0976105	0.126958	0.350404	0.368702	0.10008	0.112476	-0.533766	24	1.10717	-0.561401	24	1.26307	0.598413	0.579729	-1.04058	0.377897	0	0	0	0	0	0	0			0
931	WBGene00001165	4.328	4.583	3.988	4.102	4.207	3.986	3.878	3.791	4	4	4.25025	3.9655	0.263009	0.179675	1.44556	1.37687	0.0614239	0.0448785	0.275161	0.268912	0.0558797	0.067766	-1.48021	24	1.04701	-1.56396	24	1.47067	0.151826	0.130919	-1.07181	0.165662	0	0	0	0	0	0	0			0
932	WBGene00001166	4.66285	4.36083	4.47049	4.61159	4.08544	3.69771	4.00885	4.22661	4	4	4.52644	4.00465	0.137133	0.223625	1.50959	1.38626	0.0303998	0.0567546	0.18642	0.305718	0.0482824	0.0780928	-2.91442	24	2.6894	-2.68649	24	2.61603	0.00759805	0.0128997	-1.1303	0.0219351	0	0	0	0	0	0	0			0
933	WBGene00001167	5.96527	6.01358	5.89421	5.94433	6.33224	6.23573	5.92791	5.96039	4	4	5.95435	6.11407	0.0494769	0.200559	1.7841	1.81019	0.00831059	0.0327668	0.105512	0.191719	0.0176786	0.0314657	1.45972	24	3.30166	1.44595	24	3.16793	0.157333	0.161124	1.02682	0.169541	0	0	0	1	0	0	0			0
934	WBGene00001168	5.95433	6.03367	5.93017	5.98817	6.38967	6.22583	6.00483	6.03183	4	4	5.97658	6.16304	0.0448785	0.180321	1.78783	1.81825	0.00750131	0.0291307	0.105852	0.18419	0.0176997	0.0296686	1.7554	24	3.02783	1.76127	24	2.80969	0.0919491	0.0909306	1.0312	0.120339	0	0	0	1	0	0	0			0
935	WBGene00001169	5.80267	5.542	5.21933	5.174	6.24233	5.723	5.428	5.486	4	4	5.4345	5.71983	0.295104	0.370972	1.69167	1.7424	0.0539154	0.0635529	0.217105	0.272157	0.0390829	0.0472548	1.63917	24	1.57144	1.65459	24	1.46191	0.114222	0.111028	1.0525	0.13861	0	0	0	1	0	0	0			0
936	WBGene00001170	2.611	2.767	2.697	3.237	2.288	2.565	2.406	2.946	4	4	2.828	2.55125	0.280031	0.286598	1.03607	0.932013	0.0953866	0.109451	0.337023	0.373493	0.130121	0.129423	-1.10024	24	1.22813	-1.13399	24	1.01081	0.282141	0.267998	-1.10848	0.244642	0	0	1	0	0	0	0			0
937	WBGene00001171	2.25886	3.0641	2.45655	2.38614	2.32755	2.878	2.42748	2.43221	4	4	2.54141	2.51631	0.357935	0.245908	0.925763	0.919392	0.133924	0.0940183	0.313434	0.315787	0.127988	0.128891	-0.112843	24	1.01507	-0.0701502	24	1.01416	0.911094	0.944655	-1.00998	0.472559	0	0	0	0	0	0	0			0
938	WBGene00001172	4.69893	5.2852	4.9084	4.6918	4.94633	5.48513	4.76567	4.73733	4	4	4.89608	4.98362	0.278187	0.346923	1.58725	1.6044	0.0558413	0.0678391	0.223187	0.305679	0.0446018	0.0605695	0.462544	24	1.87582	0.455928	24	1.84419	0.647857	0.65254	1.01788	0.394849	0	0	0	0	0	0	0			0
939	WBGene00001173	4.75469	4.85134	4.66155	4.64928	5.0311	5.1761	4.92121	4.97255	4	4	4.72922	5.02524	0.0940447	0.110141	1.55361	1.61429	0.0198087	0.0217936	0.180197	0.235991	0.0402783	0.0455059	1.99396	24	1.71513	1.9971	24	1.27642	0.0576379	0.0572744	1.0626	0.0882745	0	0	0	1	0	0	0			0
940	WBGene00001174	1.943	2.175	1.794	1.527	2.764	2.57	2.386	2.881	4	4	1.85975	2.65025	0.271636	0.217909	0.612254	0.972085	0.148691	0.0830404	0.265104	0.283438	0.153495	0.119493	4.07375	24	1.14309	3.69963	24	1.65008	0.000437248	0.00112134	1.42506	0.00297788	1	0	0	0	0	0	0		176093	0
941	WBGene00001175	3.71	3.207	3.657	3.199	3.457	3.075	3.376	3.071	4	4	3.44325	3.24475	0.278278	0.201064	1.23396	1.1756	0.0809049	0.0619007	0.336841	0.311147	0.101139	0.0944367	-0.865759	24	1.17198	-0.843541	24	1.14698	0.395194	0.407255	-1.06118	0.297308	0	0	0	0	0	0	0			0
942	WBGene00001177	3.57475	3.86334	3.64887	3.39872	4.35072	4.43798	4.36787	4.24958	4	4	3.62142	4.35154	0.1924	0.0777479	1.28581	1.47041	0.0530115	0.0179164	0.314993	0.254928	0.0855498	0.0600465	3.6035	24	1.52674	3.53232	24	2.02985	0.00142514	0.00170069	1.20161	0.00678449	1	0	0	0	0	1	0		178537	0
943	WBGene00001178	3.77244	4.06262	4.18837	3.917	4.68	5.13781	5.10163	4.60163	4	4	3.98511	4.88027	0.179994	0.278734	1.3818	1.58397	0.0452718	0.0572089	0.268079	0.304981	0.0791487	0.0598826	4.40905	24	1.29425	4.0741	24	1.74697	0.000186665	0.000436856	1.22463	0.00165639	1	0	0	0	0	0	0		179461	0
944	WBGene00001179	2.88687	3.19725	2.90937	2.69325	3.433	3.81887	3.54188	3.50537	4	4	2.92169	3.57478	0.207751	0.168902	1.07029	1.27309	0.0704719	0.0464323	0.305191	0.305983	0.118335	0.0887319	3.02242	24	1.0052	2.74223	24	1.77855	0.00588341	0.0113494	1.22353	0.0183113	0	0	1	0	0	0	0			0
945	WBGene00001182	3.766	3.566	3.373	2.935	3.765	3.612	3.71	3.946	4	4	3.41	3.75825	0.354996	0.140253	1.22249	1.32344	0.1071	0.0370631	0.356868	0.325633	0.104732	0.0797154	1.44171	24	1.20104	1.53389	24	1.72613	0.162306	0.138134	1.10213	0.172702	0	0	0	0	0	0	0			0
946	WBGene00001184	3.756	4.006	2.957	2.632	3.407	3.395	2.731	2.441	4	4	3.33775	2.9935	0.649242	0.485231	1.19077	1.0863	0.197906	0.165554	0.45515	0.410723	0.142314	0.133353	-1.12304	24	1.22804	-1.07127	24	1.13891	0.272531	0.294705	-1.115	0.239593	0	1	0	0	0	0	0			0
947	WBGene00001185	1.124	2.342	2.064	1.695	1.381	1.474	1.609	1.696	4	4	1.80625	1.54	0.526404	0.139921	0.555057	0.428668	0.320979	0.091263	0.353192	0.212425	0.204008	0.14564	-1.292	24	2.76448	-1.00845	24	1.96215	0.208661	0.323299	-1.17289	0.202685	0	0	1	0	0	0	0			0
948	WBGene00001186	3.7305	3.2775	3.196	3.5955	3.0685	3.1615	2.805	3.3585	4	4	3.44988	3.09837	0.254377	0.229936	1.2363	1.12878	0.0736632	0.0750051	0.322419	0.321527	0.0947391	0.100779	-1.54391	24	1.00556	-1.55465	24	1.13157	0.135696	0.133118	-1.11345	0.154166	0	0	0	0	0	0	0			0
949	WBGene00001187	3.20746	4.09791	3.38022	3.34464	4.45382	4.75184	4.62004	4.64365	4	4	3.50756	4.61734	0.400553	0.123188	1.25031	1.52955	0.109151	0.0268125	0.347649	0.241789	0.0949692	0.0523518	5.24143	24	2.06733	5.14991	24	3.29081	2.26e-05	2.84e-05	1.3164	0.000363949	1	0	1	0	1	0	0		177513	0
950	WBGene00001188	2.706	3.47	2.971	2.613	4.196	3.97	3.878	3.751	4	4	2.94	3.94875	0.384511	0.187701	1.07226	1.37256	0.12677	0.0471906	0.376348	0.299714	0.131026	0.0673908	4.19343	24	1.57675	4.07631	24	3.7802	0.00032284	0.000434418	1.34311	0.00241808	1	0	0	0	0	0	0		177821	0
951	WBGene00001189	4.47783	5.15767	4.71783	4.52517	4.614	5.36833	4.551	4.69517	4	4	4.71962	4.80713	0.309925	0.378764	1.55016	1.56787	0.0643006	0.0761727	0.224188	0.290389	0.049675	0.0590591	0.477022	24	1.67778	0.459138	24	1.41351	0.637662	0.650266	1.01854	0.391427	0	0	0	0	0	0	0			0
952	WBGene00001190	2.33487	2.76633	2.6332	2.39867	2.8416	2.986	2.77753	2.624	4	4	2.53327	2.80728	0.201483	0.150106	0.927148	1.03114	0.0792736	0.0536164	0.280568	0.317962	0.118884	0.113583	1.29238	24	1.28433	1.26497	24	1.09552	0.208531	0.218029	1.10817	0.202641	0	0	0	0	0	0	0			0
953	WBGene00001193	4.614	4.679	4.437	4.588	3.329	3.319	3.194	3.451	4	4	4.5795	3.32325	0.102419	0.105003	1.5214	1.20057	0.0225161	0.0316258	0.211844	0.316816	0.0437195	0.092484	-6.59246	24	2.23658	-6.27256	24	4.4749	8.09e-07	1.75e-06	-1.37802	3.05e-05	0	0	0	0	0	0	0	expressed in other tissue		0
954	WBGene00001194	4.63615	4.79057	4.52492	4.6036	4.81695	5.00012	4.73635	4.83575	4	4	4.63881	4.84729	0.111429	0.110634	1.53424	1.57823	0.0238916	0.0226914	0.181003	0.256171	0.0414315	0.0560511	1.32933	24	2.00304	1.26204	24	1.83024	0.196239	0.21906	1.04494	0.195271	0	0	1	0	0	0	0			0
955	WBGene00001196	4.82	4.674	4.518	4.405	4.717	4.958	4.921	4.816	4	4	4.60425	4.853	0.181248	0.108803	1.5264	1.57941	0.0393131	0.0224957	0.209489	0.253608	0.0431607	0.0539991	1.51243	24	1.46556	1.53361	24	1.56529	0.143483	0.138204	1.05403	0.159553	0	0	0	1	0	0	0			0
956	WBGene00001202	3.31617	3.58617	3.33883	2.99383	3.93033	3.92833	3.49283	3.256	4	4	3.30875	3.65187	0.242963	0.334654	1.19452	1.29204	0.0742869	0.0927943	0.360462	0.333057	0.104599	0.0992831	1.3983	24	1.17134	1.35243	24	1.10995	0.174812	0.188844	1.1037	0.181098	0	0	0	0	0	0	0			0
957	WBGene00001204	2.013	2.165	2.158	2.123	2.512	3.058	2.032	2.546	4	4	2.11475	2.537	0.0702774	0.419194	0.748515	0.920596	0.0337013	0.167165	0.23302	0.386759	0.113111	0.139453	1.8703	24	2.75483	1.91672	24	1.52001	0.0736874	0.0672548	1.19967	0.104384	0	0	0	0	0	0	0			0
958	WBGene00001207	2.89	3.15257	2.61343	2.65814	2.586	2.78543	2.43443	2.57529	4	4	2.82854	2.59529	0.247711	0.144356	1.03694	0.952547	0.0862367	0.0552589	0.328087	0.272077	0.126747	0.109769	-1.09449	24	1.4541	-1.00666	24	1.33327	0.284602	0.324139	-1.08987	0.245907	0	0	0	1	0	0	0			0
959	WBGene00001208	4.363	4.487	4.201	3.905	4.633	4.54	4.503	4.346	4	4	4.239	4.5055	0.251582	0.119573	1.44298	1.50503	0.0602032	0.0266836	0.251255	0.238002	0.0536704	0.0571799	1.54009	24	1.11446	1.5825	24	1.13505	0.136621	0.126625	1.06287	0.15485	0	1	1	0	0	0	0			0
960	WBGene00001209	5.09033	4.72102	4.7716	4.86282	4.57278	4.48078	4.60111	4.824	4	4	4.86144	4.61967	0.163485	0.145585	1.58092	1.52995	0.0332824	0.0312239	0.201097	0.239799	0.0394969	0.0522714	-1.54511	24	1.42194	-1.55574	24	1.75147	0.135406	0.13286	-1.05234	0.153992	0	0	0	0	0	0	0			0
961	WBGene00001210	2.807	3.925	2.466	2.757	2.758	3.536	2.608	3.291	4	4	2.98875	3.04825	0.642021	0.437757	1.07906	1.10682	0.200564	0.143765	0.458365	0.389319	0.141354	0.129178	0.197876	24	1.38616	0.289975	24	1.19739	0.844809	0.774326	1.01991	0.454468	0	0	0	0	0	0	0			0
962	WBGene00001211	2.19486	2.344	2.49157	2.01557	2.32543	2.26314	2.35929	1.96743	4	4	2.2615	2.22882	0.203847	0.178753	0.812948	0.798936	0.0908868	0.083278	0.283311	0.270874	0.123327	0.125379	-0.166742	24	1.09394	-0.159344	24	1.03355	0.86897	0.874731	-1.01466	0.460658	0	0	0	0	0	0	0			0
963	WBGene00001214	4.58969	4.15589	4.4611	4.627	3.54094	3.27089	3.88728	4.16114	4	4	4.45842	3.71506	0.213841	0.38998	1.49391	1.30824	0.0488345	0.105452	0.21013	0.389987	0.0461242	0.100884	-3.35605	24	3.44449	-3.34761	24	4.78398	0.00262613	0.002681	-1.20009	0.0104414	0	0	0	0	0	0	1			0
964	WBGene00001215	4.46469	4.15964	4.41479	4.42121	4.07133	4.17318	4.28375	4.38854	4	4	4.36508	4.2292	0.138744	0.137147	1.47325	1.44162	0.0322697	0.0324376	0.211956	0.252491	0.0499842	0.0628641	-0.824367	24	1.41905	-0.787706	24	1.58175	0.417849	0.43858	-1.03213	0.307323	0	0	0	0	0	0	0			0
965	WBGene00001223	2.304	1.725	1.08	1.287	2.484	1.474	0.989	1.166	4	4	1.599	1.52825	0.541481	0.667936	0.427287	0.360092	0.333264	0.401429	0.336685	0.391319	0.217425	0.250764	-0.274106	24	1.35087	-0.404915	24	1.33018	0.786349	0.689127	-1.04629	0.438361	0	0	1	0	0	0	0			0
966	WBGene00001224	4.9612	4.69092	4.87836	4.9264	4.53384	4.47184	4.52576	4.7072	4	4	4.86422	4.55966	0.120422	0.102138	1.58167	1.51706	0.0250023	0.0222122	0.191618	0.263184	0.0387832	0.0578529	-1.87105	24	1.88646	-1.85532	24	2.22517	0.07358	0.0758737	-1.06679	0.104333	0	0	0	0	0	0	0			0
967	WBGene00001225	5.07065	4.8353	4.62557	4.72691	4.85361	4.65096	4.46935	4.61883	4	4	4.81461	4.64818	0.190975	0.158168	1.57107	1.53604	0.0393455	0.0339081	0.197126	0.255997	0.0398529	0.0546156	-1.03017	24	1.68649	-1.03613	24	1.87808	0.3132	0.310468	-1.0358	0.260067	0	0	0	0	0	0	0			0
968	WBGene00001226	5.24866	4.86423	4.997	5.2238	4.52923	4.27131	4.61717	4.89971	4	4	5.08342	4.57936	0.184863	0.259141	1.62549	1.52036	0.0365194	0.056582	0.200969	0.297388	0.0370704	0.0603542	-2.80874	24	2.18973	-2.96846	24	2.6507	0.00972959	0.00668775	-1.11007	0.0261479	0	0	0	0	0	0	0			0
969	WBGene00001227	4.99629	4.87586	4.84807	5.05029	4.488	4.23564	4.452	4.606	4	4	4.94262	4.44541	0.0963823	0.154541	1.59775	1.49141	0.0194843	0.0350624	0.166127	0.251775	0.0340411	0.0557818	-3.2967	24	2.29692	-3.25457	24	2.6852	0.00303622	0.00336441	-1.11185	0.0115252	0	1	0	0	0	0	0			0
970	WBGene00001228	4.22686	4.00814	4.25686	4.30557	4.02657	3.74286	4.06471	4.08957	4	4	4.19936	3.98093	0.131538	0.160815	1.43456	1.38089	0.0317427	0.04119	0.248568	0.25418	0.064127	0.069964	-1.22879	24	1.04566	-1.13101	24	1.19033	0.231064	0.269228	-1.05487	0.216171	0	0	0	0	0	0	0			0
971	WBGene00001229	5.478	5.721	5.511	5.702	5.606	5.441	5.384	5.506	4	4	5.603	5.48425	0.126246	0.0952484	1.72311	1.70177	0.0225399	0.0173279	0.141735	0.238027	0.0254444	0.0429094	-0.857308	24	2.82029	-0.855713	24	2.84394	0.399755	0.400619	-1.02165	0.299429	0	0	0	0	0	0	0			0
972	WBGene00001230	4.74	4.193	4.111	4.439	3.832	3.498	3.661	3.936	4	4	4.37075	3.73175	0.282883	0.192711	1.47339	1.31587	0.063994	0.051926	0.244982	0.305628	0.0571753	0.0853807	-3.26274	24	1.55639	-3.06584	24	2.22999	0.00329817	0.0053043	-1.17123	0.0122514	0	0	0	1	0	0	0			0
973	WBGene00001231	4.805	4.431	4.754	5.039	4.761	4.448	4.675	4.846	4	4	4.75725	4.6825	0.250408	0.171212	1.55862	1.54332	0.053084	0.0369485	0.213805	0.261932	0.0446148	0.052539	-0.442159	24	1.50087	-0.443817	24	1.38677	0.662333	0.661151	-1.01596	0.39979	0	0	0	0	0	0	0			0
974	WBGene00001232	4.348	3.96	4.097	4.222	4.056	3.84	3.671	3.761	4	4	4.15675	3.832	0.166448	0.164522	1.42413	1.3427	0.0401058	0.0425129	0.267971	0.297967	0.0591437	0.0733223	-1.62075	24	1.2364	-1.72875	24	1.53693	0.118137	0.0966998	-1.08475	0.141471	0	0	0	0	0	0	0			0
975	WBGene00001233	5.603	5.301	5.203	5.544	5.259	4.893	4.798	5.146	4	4	5.41275	5.024	0.191402	0.214745	1.68829	1.61354	0.0354198	0.0427402	0.180486	0.254086	0.0334532	0.0496722	-2.49467	24	1.98188	-2.49624	24	2.2047	0.0198888	0.0198194	-1.07738	0.0426576	0	0	0	1	0	0	0			0
976	WBGene00001234	4.725	4.841	5.222	5.155	4.761	4.437	4.951	4.846	4	4	4.98575	4.74875	0.240418	0.221886	1.60571	1.55704	0.048333	0.0474875	0.208779	0.273983	0.0410281	0.0574805	-1.37605	24	1.72216	-1.37818	24	1.96281	0.181511	0.180861	-1.04991	0.185648	0	0	0	0	0	0	0			0
977	WBGene00001235	3.73	3.353	3.922	3.997	3.491	3.086	3.888	3.796	4	4	3.7505	3.56525	0.287866	0.361758	1.3196	1.26723	0.0787651	0.104341	0.320862	0.332769	0.08168	0.100595	-0.801491	24	1.0756	-0.808391	24	1.51678	0.430712	0.426806	-1.05196	0.312912	0	0	0	0	0	0	0			0
978	WBGene00001236	4.273	4.33	4.537	4.568	4.207	4.252	4.232	4.181	4	4	4.427	4.218	0.147316	0.0307788	1.48731	1.43934	0.0333124	0.00730021	0.203381	0.273935	0.0424384	0.0624165	-1.22516	24	1.81416	-1.27098	24	2.16312	0.232404	0.215916	-1.04955	0.216883	0	0	0	0	0	0	0			0
979	WBGene00001237	2.053	1.699	1.756	1.839	1.683	1.74	1.437	1.501	4	4	1.83675	1.59025	0.155204	0.144313	0.605401	0.460788	0.0825872	0.0910649	0.246053	0.203559	0.133288	0.146486	-1.5438	24	1.46109	-1.46036	24	1.20784	0.13572	0.157159	-1.15501	0.154176	0	0	0	0	0	0	0			0
980	WBGene00001239	5.664	5.933	5.875	5.736	5.925	5.658	5.832	5.976	4	4	5.802	5.84775	0.12368	0.139844	1.75803	1.76584	0.0213314	0.0240699	0.132897	0.194379	0.0231876	0.0332144	0.388589	24	2.1393	0.385534	24	2.05183	0.701006	0.703238	1.00789	0.411936	0	0	0	1	0	1	0			0
981	WBGene00001240	5.689	5.569	5.96	5.702	6.043	5.007	5.866	5.976	4	4	5.73	5.723	0.164607	0.482878	1.74541	1.74167	0.0284971	0.0880768	0.149999	0.311069	0.0262199	0.0561426	-0.0405391	24	4.30068	-0.120842	24	4.58483	0.967999	0.904822	-1.00122	0.487617	0	0	1	1	0	1	0			0
982	WBGene00001241	4.14917	4.14767	4.447	4.42583	4.14583	3.99917	4.4535	4.52267	4	4	4.29242	4.28029	0.166502	0.248902	1.45629	1.45275	0.0387995	0.0584092	0.229239	0.283281	0.0535837	0.0646375	-0.0665449	24	1.52707	-0.0843251	24	1.45513	0.947495	0.933497	-1.00283	0.482581	0	0	0	0	0	0	0			0
983	WBGene00001242	4.152	3.531	2.834	2.824	2.411	3.064	2.49	2.666	4	4	3.33525	2.65775	0.637188	0.291051	1.19125	0.973156	0.186847	0.106321	0.442526	0.324876	0.13895	0.115491	-2.46824	24	1.85541	-2.41418	24	1.44751	0.0210904	0.0237598	-1.25491	0.0444574	0	0	0	0	0	0	0			0
984	WBGene00001243	5.207	5.129	5.799	5.957	4.599	3.753	5.541	5.896	4	4	5.523	4.94725	0.416183	0.966122	1.70679	1.58371	0.0753457	0.203608	0.254388	0.553151	0.0460718	0.114339	-1.89129	24	4.72818	-1.9969	24	6.15908	0.070715	0.0572969	-1.11638	0.10159	0	0	0	0	0	1	0			0
985	WBGene00001244	5.242	5.296	6.059	6.087	5.131	4.909	5.891	6.266	4	4	5.671	5.54925	0.464853	0.636495	1.73284	1.70873	0.082125	0.114601	0.268633	0.37544	0.0474456	0.0683596	-0.527458	24	1.95326	-0.57937	24	2.0759	0.602718	0.567739	-1.02194	0.379462	0	0	0	0	0	1	0			0
986	WBGene00001245	1.752	2.6	2.631	1.964	1.857	1.8	2.357	2.006	4	4	2.23675	2.005	0.446004	0.250223	0.789654	0.69007	0.203824	0.120486	0.34516	0.28597	0.156518	0.153095	-1.03406	24	1.4568	-0.909681	24	1.04522	0.311417	0.372036	-1.11559	0.259277	0	0	0	0	0	0	0			0
987	WBGene00001246	1.58373	1.85427	1.57918	1.52164	1.23473	1.26673	1.33409	1.32282	4	4	1.6347	1.28959	0.149082	0.0469648	0.488492	0.253825	0.0879082	0.0365474	0.220319	0.2067	0.143492	0.157339	-2.28475	24	1.13613	-2.20401	24	1.2023	0.0314631	0.0373593	-1.26761	0.0587015	0	0	0	0	0	0	0			0
988	WBGene00001247	2.766	2.908	3.463	3.069	3.105	3.395	3.297	3.406	4	4	3.0515	3.30075	0.300966	0.139395	1.11209	1.19347	0.0965309	0.0428756	0.342398	0.318804	0.113772	0.0903319	1.06554	24	1.15349	1.12036	24	1.58632	0.297235	0.273647	1.08168	0.252258	0	0	0	0	0	0	0			0
989	WBGene00001248	2.19908	2.91279	2.94317	2.75596	3.21238	3.76321	4.07925	3.90537	4	4	2.70275	3.74005	0.345653	0.374774	0.987601	1.31514	0.136132	0.104106	0.347803	0.35885	0.135274	0.0939829	4.15137	24	1.06454	3.97695	24	2.07171	0.000359191	0.000558493	1.3838	0.00260122	1	1	1	0	0	0	0		180358	0
990	WBGene00001249	2.714	3.0266	2.8364	2.4686	3.0792	2.9054	2.4584	2.477	4	4	2.7614	2.73	0.233762	0.311171	1.01301	0.99945	0.0855587	0.113595	0.350866	0.320503	0.126079	0.129782	-0.132151	24	1.19845	-0.149913	24	1.0596	0.895967	0.882086	-1.0115	0.468024	0	0	0	0	0	0	0			0
991	WBGene00001250	3.063	3.379	3.373	3.026	2.607	2.462	2.834	2.691	4	4	3.21025	2.6485	0.192002	0.155693	1.165	0.972694	0.0598927	0.0589085	0.351069	0.273355	0.101608	0.107332	-2.52506	24	1.64941	-2.60235	24	1.11584	0.0185859	0.0156213	-1.2121	0.0407697	0	0	1	0	0	1	0			0
992	WBGene00001251	2.576	3.03	2.683	2.56	2.943	2.793	2.549	2.576	4	4	2.71225	2.71525	0.218758	0.187034	0.995436	0.997121	0.0782362	0.0684005	0.364444	0.316205	0.117425	0.125106	0.0124353	24	1.32839	0.019645	24	1.13512	0.990181	0.984489	1.00111	0.493409	0	0	0	0	0	0	0			0
993	WBGene00001252	2.269	2.595	2.759	2.142	2.405	2.364	2.416	2.286	4	4	2.44125	2.36775	0.285088	0.0589145	0.887383	0.861705	0.116978	0.0250831	0.296081	0.281369	0.126222	0.118951	-0.359896	24	1.10731	-0.296104	24	1.126	0.722073	0.769698	-1.03104	0.418738	0	0	0	0	0	0	0			0
994	WBGene00001253	4.243	4.755	3.6	3.699	3.793	3.97	3.051	3.051	4	4	4.07425	3.46625	0.534672	0.484904	1.39837	1.23572	0.129114	0.140091	0.423992	0.397546	0.0937978	0.115325	-2.09216	24	1.13747	-2.18831	24	1.51168	0.0471782	0.0386157	-1.17541	0.0774872	0	0	0	0	0	0	0			0
995	WBGene00001258	4.72781	4.51762	4.53229	4.59217	4.18836	4.18953	4.24136	4.38953	4	4	4.59247	4.2522	0.0958137	0.094834	1.52426	1.44725	0.0207161	0.0221059	0.189579	0.255285	0.0395625	0.0658989	-2.14024	24	1.8133	-2.00372	24	2.77454	0.0427046	0.0565138	-1.08002	0.0723777	0	0	0	0	0	0	0			0
996	WBGene00001259	5.07394	4.75124	4.9695	5.01799	4.42704	4.42556	4.68443	4.88071	4	4	4.95317	4.60444	0.141219	0.220752	1.59972	1.52617	0.0288223	0.0476198	0.166915	0.263523	0.036065	0.0580392	-2.23591	24	2.49257	-2.1528	24	2.58983	0.0349193	0.0416004	-1.07574	0.0629269	0	0	0	0	0	0	0			0
997	WBGene00001262	5.063	4.89563	5.14795	5.17568	4.51437	4.49926	4.81216	5.03574	4	4	5.07057	4.71538	0.126091	0.257622	1.62322	1.54972	0.0250671	0.054244	0.182441	0.269254	0.0368037	0.0580738	-2.18412	24	2.17811	-2.13798	24	2.48988	0.0389576	0.0429061	-1.07532	0.068153	0	0	0	0	0	0	0			0
998	WBGene00001263	4.15257	4.56358	4.48226	4.15915	6.10082	6.116	5.91938	5.75344	4	4	4.33939	5.97241	0.214523	0.171141	1.46682	1.78684	0.0493955	0.0288174	0.221055	0.185348	0.0556383	0.0309067	11.3216	24	1.42241	10.0563	24	3.24073	4.13e-11	4.4e-10	1.37632	5.28e-08	1	1	1	0	1	0	0	predominantly expressed in muscle	176314	0
999	WBGene00001281	4.37967	3.865	4.07556	4.26328	3.23328	2.77417	3.31172	3.58156	4	4	4.14588	3.22518	0.225298	0.335645	1.42099	1.16678	0.0547668	0.106947	0.284441	0.377766	0.0730964	0.109545	-3.894	24	1.76385	-3.86072	24	2.24593	0.000688467	0.000748617	-1.28547	0.00408818	0	0	0	0	0	0	0			0
1000	WBGene00001284	4.19794	3.95436	4.24891	4.35133	3.56791	3.52576	3.86142	4.02176	4	4	4.18814	3.74421	0.168397	0.23775	1.43164	1.31871	0.040709	0.0632316	0.26315	0.34364	0.0663943	0.0862479	-2.05129	24	1.7053	-2.07513	24	1.68747	0.0513061	0.0488616	-1.11856	0.081816	0	0	0	0	0	0	0			0
1001	WBGene00001303	5.312	5.306	5.492	5.717	5.427	4.779	5.364	5.386	4	4	5.45675	5.239	0.193779	0.307776	1.69639	1.65478	0.0352086	0.0605611	0.194168	0.265942	0.034358	0.0495374	-1.32258	24	1.87593	-1.38019	24	2.07879	0.198442	0.180251	-1.04156	0.196663	0	0	0	1	0	0	0			0
1002	WBGene00001309	4.629	3.945	4.385	4.343	3.564	3.292	3.632	3.786	4	4	4.3255	3.5685	0.283278	0.206407	1.46289	1.27087	0.0665064	0.0586261	0.274127	0.311707	0.0557502	0.0900366	-3.64732	24	1.29297	-3.62643	24	2.60822	0.00127776	0.00134607	-1.21213	0.00627292	0	0	0	1	0	0	0			0
1003	WBGene00001310	3.886	3.419	2.168	2.464	3.082	2.869	2.126	2.186	4	4	2.98425	2.56575	0.803966	0.481686	1.06558	0.928964	0.273208	0.188314	0.516374	0.402806	0.177047	0.151225	-1.27806	24	1.64338	-1.17347	24	1.37067	0.213453	0.252123	-1.16311	0.205656	0	0	0	0	0	0	0			0
1004	WBGene00001311	2.561	2.225	2.314	1.733	2.316	1.121	1.284	1.976	4	4	2.20825	1.67425	0.347255	0.566061	0.782247	0.471279	0.165875	0.344633	0.316344	0.35142	0.150882	0.213427	-2.25873	24	1.23405	-2.37948	24	2.0009	0.0332635	0.025634	-1.31895	0.0609143	0	0	0	0	0	0	0			0
1005	WBGene00001320	5.41517	5.2485	5.436	5.43867	5.26117	4.78483	5.118	5.29683	4	4	5.38458	5.11521	0.0913285	0.233414	1.68343	1.63142	0.0171023	0.0464202	0.172269	0.258911	0.0322955	0.0502205	-1.7324	24	2.25886	-1.74219	24	2.41812	0.0960365	0.094279	-1.05266	0.123915	0	0	0	0	0	1	0			0
1006	WBGene00001324	4.84795	4.71164	4.82645	4.72523	3.83918	3.76091	4.18191	4.18032	4	4	4.77782	3.99058	0.0693552	0.222319	1.5639	1.38277	0.0145143	0.0558419	0.19104	0.275158	0.0399241	0.0773585	-4.70029	24	2.07451	-4.1615	24	3.75444	8.9e-05	0.000350078	-1.19727	0.000979266	0	0	0	0	0	0	0			0
1007	WBGene00001325	4.14969	3.99535	3.84208	3.96035	4.57627	4.22935	4.01735	4.146	4	4	3.98687	4.24224	0.126822	0.239152	1.38263	1.44392	0.0317239	0.0555034	0.261814	0.278394	0.0790539	0.0649096	1.33647	24	1.13067	1.19852	24	1.4833	0.19393	0.242415	1.06405	0.193779	0	0	0	0	0	0	0			0
1008	WBGene00001328	4.16291	4.3974	4.02844	3.94428	5.6919	5.44827	5.58302	5.59532	4	4	4.13325	5.57963	0.197779	0.100198	1.41822	1.719	0.047384	0.0180065	0.295853	0.199121	0.0679844	0.0352137	8.11155	24	2.20759	7.85715	24	3.7273	2.47e-08	4.34e-08	1.34994	2.64e-06	1	1	1	0	0	0	0	exclusively expressed in muscle	177956	0
1009	WBGene00001329	4.52137	4.69838	4.1525	4.28263	5.11238	4.83437	4.33838	4.35475	4	4	4.41372	4.65997	0.243612	0.379328	1.48358	1.53655	0.055114	0.0808563	0.227994	0.302704	0.0513284	0.066391	1.29961	24	1.76276	1.26237	24	1.67302	0.206081	0.218944	1.05579	0.201262	0	0	0	0	0	0	0			0
1010	WBGene00001330	3.876	4.767	4.0355	4.268	4.0115	4.6485	4.0815	4.3285	4	4	4.23663	4.2675	0.388494	0.288105	1.4407	1.44935	0.0898314	0.0666237	0.285018	0.294434	0.0697444	0.0721558	0.150687	24	1.06717	0.172387	24	1.07035	0.881482	0.864579	1.00729	0.46431	0	0	0	0	0	1	0			0
1011	WBGene00001331	4.695	4.805	4.731	4.487	5.041	4.876	5.113	4.876	4	4	4.6795	4.9765	0.136258	0.119712	1.54287	1.60451	0.0294128	0.0240161	0.193625	0.258862	0.0398606	0.0510231	1.83751	24	1.78737	1.90405	24	1.63851	0.0785481	0.0689596	1.06347	0.109073	0	1	1	0	0	0	0			0
1012	WBGene00001332	4.03757	3.80014	3.91314	4.06786	3.18243	3.026	3.60771	3.76314	4	4	3.95468	3.39482	0.122865	0.347431	1.37453	1.2183	0.0312321	0.10271	0.27767	0.365354	0.0762536	0.108732	-2.44002	24	1.73129	-2.35278	24	2.03326	0.0224469	0.0271676	-1.16492	0.0463647	0	0	0	0	0	0	0			0
1013	WBGene00001333	4.83611	4.90244	4.93389	4.77344	4.86389	4.55256	4.71767	4.61322	4	4	4.86147	4.68683	0.0714492	0.136319	1.58126	1.54444	0.0147231	0.0289436	0.183928	0.267002	0.0360941	0.0522366	-1.07728	24	2.10734	-1.15974	24	2.09448	0.292064	0.257562	-1.03726	0.24995	0	0	0	0	0	1	0			0
1014	WBGene00001334	4.66371	4.72929	4.70614	4.67071	4.18	4.167	4.25171	4.25029	4	4	4.69246	4.21225	0.0307817	0.0450621	1.54594	1.43795	0.0065554	0.0107002	0.182929	0.279593	0.0363649	0.0624985	-2.87451	24	2.33607	-2.98688	24	2.95376	0.00834473	0.00640215	-1.114	0.0233883	0	0	1	0	0	0	0			0
1015	WBGene00001335	3.017	2.635	3.397	2.44	1.661	2.7	2.16	3.166	4	4	2.87225	2.42175	0.424045	0.652836	1.04701	0.855812	0.146453	0.280248	0.401619	0.452154	0.130548	0.1843	-1.48983	24	1.26749	-1.69311	24	1.99301	0.149293	0.103377	-1.18602	0.164073	0	0	1	0	0	0	0			0
1016	WBGene00001336	4.97241	4.93463	4.75959	4.98844	4.50619	4.52948	4.50922	4.77248	4	4	4.91377	4.57934	0.105231	0.129174	1.59187	1.52126	0.0216204	0.0278303	0.180553	0.275952	0.0365553	0.0542274	-2.02823	24	2.33592	-2.15923	24	2.20058	0.0537748	0.0410451	-1.07303	0.0844696	0	0	0	1	0	0	0			0
1017	WBGene00001337	4.90818	4.65702	4.73044	4.90524	4.34324	4.39686	4.46508	4.6331	4	4	4.80022	4.45957	0.12657	0.125974	1.5684	1.49476	0.0264227	0.0280334	0.188812	0.271232	0.0394543	0.0542221	-2.06155	24	2.0636	-2.19646	24	1.88871	0.0502411	0.0379594	-1.07639	0.0807835	0	0	0	0	0	0	0			0
1018	WBGene00001338	3.08038	3.1955	3.21913	3.27038	2.32837	2.7315	2.93587	3.00537	4	4	3.19134	2.75028	0.08031	0.304344	1.1602	1.00686	0.0253477	0.115207	0.335042	0.334307	0.101387	0.120179	-1.86377	24	1.0044	-1.95054	24	1.40507	0.0746339	0.0628833	-1.16037	0.10541	0	0	1	0	0	0	0			0
1019	WBGene00001340	5.608	5.175	5.26	5.169	6.026	5.924	5.467	5.596	4	4	5.303	5.75325	0.207536	0.26471	1.66771	1.74897	0.0384892	0.0460826	0.189869	0.223733	0.0350463	0.039015	3.06878	24	1.38851	3.09884	24	1.2393	0.00526717	0.00490116	1.0849	0.0169167	0	1	1	0	0	0	0			0
1020	WBGene00001345	3.3046	3.8166	3.5804	3.277	3.6982	4.1232	3.8214	3.889	4	4	3.49465	3.88295	0.254621	0.178585	1.24927	1.35581	0.0721121	0.0455919	0.32457	0.283266	0.0900176	0.0735369	1.80271	24	1.31289	1.83319	24	1.49845	0.0840064	0.0792077	1.11111	0.113442	0	0	1	0	0	0	0			0
1021	WBGene00001352	4.34554	4.1118	4.22825	4.3033	3.54436	3.67744	3.79523	4.07272	4	4	4.24722	3.77244	0.102484	0.224895	1.44605	1.32641	0.0242597	0.0589776	0.242186	0.316717	0.048948	0.0819087	-2.38164	24	1.71019	-2.50759	24	2.8002	0.0255137	0.0193245	-1.12586	0.0505507	0	0	0	0	0	0	0			0
1022	WBGene00001358	4.182	4.249	4.225	4.549	3.905	3.438	3.883	4.336	4	4	4.30125	3.8905	0.167476	0.366739	1.45835	1.35518	0.0382743	0.0948945	0.235657	0.333308	0.0531015	0.0854678	-2.01249	24	2.00047	-2.05073	24	2.59054	0.0555203	0.0513652	-1.10558	0.086319	0	0	0	0	0	0	0			0
1023	WBGene00001365	4.147	3.622	4.116	4.213	4.006	3.281	3.331	3.321	4	4	4.0245	3.48475	0.271365	0.348171	1.39062	1.24487	0.0697395	0.0955062	0.301365	0.324738	0.0708244	0.0894974	-2.43663	24	1.16113	-2.55403	24	1.59682	0.0226153	0.0174179	-1.15489	0.0466074	0	0	0	0	0	0	0			0
1024	WBGene00001366	3.5408	4.297	3.70913	3.55333	3.29327	3.99107	3.35307	3.624	4	4	3.77507	3.56535	0.356281	0.318208	1.32524	1.26835	0.0909368	0.0876074	0.341479	0.324459	0.0870428	0.0954254	-0.890436	24	1.10767	-0.880926	24	1.20189	0.382072	0.387095	-1.05882	0.29189	0	1	1	0	0	0	0			0
1025	WBGene00001368	3.28833	3.69567	3.13233	2.917	3.523	3.216	3.482	3.461	4	4	3.25833	3.4205	0.32891	0.138743	1.17747	1.22915	0.0994837	0.0413393	0.348709	0.318335	0.108413	0.0993413	0.686914	24	1.19994	0.702986	24	1.19097	0.498721	0.488828	1.04977	0.340924	0	0	0	0	0	0	0			0
1026	WBGene00001371	4.629	4.709	4.579	4.597	4.381	3.943	4.414	4.536	4	4	4.6285	4.3185	0.0575123	0.259058	1.53218	1.46151	0.0123768	0.0615534	0.180104	0.296864	0.0418452	0.0671065	-1.78558	24	2.71686	-1.78705	24	2.5718	0.0868113	0.0865668	-1.07178	0.115923	0	1	0	0	0	0	0			0
1027	WBGene00001372	5.558	5.175	5.615	5.63	4.319	3.748	4.916	5.256	4	4	5.4945	4.55975	0.215246	0.665476	1.70316	1.50903	0.0399323	0.149395	0.185241	0.421856	0.0343931	0.0952082	-4.05765	24	5.18629	-3.83541	24	7.66313	0.000455433	0.00079782	-1.205	0.00306644	0	0	0	0	0	0	0			0
1028	WBGene00001373	2.184	2.812	2.678	2.425	3.564	3.46	3.745	3.391	4	4	2.52475	3.54	0.278124	0.154058	0.921489	1.26342	0.112015	0.0431449	0.304022	0.309501	0.129054	0.0924376	4.68026	24	1.03636	4.30802	24	1.94914	9.36e-05	0.00024133	1.40212	0.00101842	1	0	0	0	0	0	0		186801	0
1029	WBGene00001374	2.656	3.389	3.076	2.829	4.095	4.296	4.513	4.511	4	4	2.9875	4.35375	0.318355	0.200312	1.09023	1.47023	0.105652	0.0464734	0.360431	0.270966	0.110983	0.0639462	6.05977	24	1.76936	5.93356	24	3.01218	2.94e-06	4.01e-06	1.45732	8.09e-05	1	0	0	0	0	0	0		179003	0
1030	WBGene00001377	2.6535	3.0625	2.237	2.46067	2.63767	2.687	2.37167	2.7085	4	4	2.60342	2.60121	0.350193	0.155874	0.95017	0.954577	0.132604	0.0616636	0.341274	0.273642	0.138688	0.108899	-0.0100971	24	1.55539	0.0499874	24	1.62192	0.992027	0.960546	-1.00085	0.493698	0	0	1	0	0	0	0			0
1031	WBGene00001385	5.618	5.65	6.05	5.75	6.345	5.766	5.999	6.151	4	4	5.767	6.06525	0.196865	0.244644	1.75172	1.80196	0.033706	0.0404538	0.15917	0.209939	0.0275819	0.0345552	2.26413	24	1.73965	2.27266	24	1.56956	0.0328823	0.0322887	1.05172	0.0604126	0	1	1	1	0	0	0			0
1032	WBGene00001386	5.804	5.893	5.672	5.774	6.054	6.2	6.156	6.241	4	4	5.78575	6.16275	0.0911277	0.0803798	1.7553	1.81846	0.0157654	0.0130853	0.129486	0.165312	0.0223653	0.0266448	3.59069	24	1.62992	3.63089	24	1.41931	0.00147126	0.0013312	1.06516	0.00694818	1	1	0	1	0	0	0		176284	0
1033	WBGene00001387	3.369	3.419	4.116	3.934	3.469	3.275	3.538	3.846	4	4	3.7095	3.532	0.372368	0.237101	1.30713	1.26019	0.100215	0.066525	0.327634	0.298716	0.0959748	0.0942077	-0.800689	24	1.20298	-0.697932	24	1.03787	0.431167	0.491927	-1.05025	0.313034	0	0	1	0	0	0	0			0
1034	WBGene00001388	2.766	1.598	1.856	2.075	2.534	1.235	1.574	2.166	4	4	2.07375	1.87725	0.500987	0.58285	0.708635	0.591843	0.232001	0.322016	0.336079	0.378978	0.166745	0.205053	-0.775866	24	1.27159	-0.883806	24	1.51226	0.445407	0.385569	-1.10467	0.318936	0	0	0	0	0	0	0			0
1035	WBGene00001389	3.158	3.611	3.846	3.531	3.049	2.831	3.115	3.376	4	4	3.5365	3.09275	0.28556	0.224464	1.26063	1.12709	0.0821877	0.0724293	0.324165	0.319209	0.0943139	0.0994363	-1.95077	24	1.03129	-1.94883	24	1.11157	0.062854	0.0630984	-1.14348	0.0937304	0	0	0	0	0	0	0			0
1036	WBGene00001390	4.172	4.289	3.709	4.549	6.093	5.875	5.472	6.011	4	4	4.17975	5.86275	0.351163	0.275577	1.42753	1.76777	0.0857979	0.0478418	0.33418	0.223905	0.0697576	0.0384086	8.36781	24	2.22757	8.54526	24	3.29857	1.41e-08	9.63e-09	1.40266	1.8e-06	1	1	1	1	0	0	0	exclusively expressed in muscle	189096	0
1037	WBGene00001391	2.711	4.461	4.135	3.199	3.144	3.986	3.425	3.116	4	4	3.6265	3.41775	0.811554	0.403713	1.26875	1.22398	0.230197	0.114126	0.497025	0.386849	0.143879	0.103146	-0.662878	24	1.65072	-0.505786	24	1.94578	0.513726	0.617621	-1.06108	0.346844	0	0	1	0	0	0	0			0
1038	WBGene00001392	4.835	5.073	5.307	5.232	4.621	4.252	4.793	4.621	4	4	5.11175	4.57175	0.208706	0.228066	1.63091	1.51894	0.0412318	0.0507173	0.193701	0.287999	0.0388908	0.059393	-3.11169	24	2.21064	-3.15429	24	2.33226	0.00475231	0.00428917	-1.11812	0.0157796	0	0	0	0	0	0	0			0
1039	WBGene00001393	5.5854	5.8026	5.6404	5.715	6.2634	6.184	5.795	5.937	4	4	5.68585	6.04485	0.094227	0.216936	1.73788	1.79872	0.0165465	0.035983	0.143864	0.202722	0.0251051	0.0335278	2.88838	24	1.98564	2.90527	24	1.78355	0.00807766	0.00776331	1.06314	0.0228581	0	0	0	0	0	0	0			0
1040	WBGene00001394	4.5158	4.8642	4.5074	4.6778	4.5142	4.0852	4.0852	4.523	4	4	4.6413	4.3019	0.168024	0.250249	1.53451	1.45779	0.0359126	0.0582203	0.184599	0.294575	0.0438211	0.0644852	-1.95261	24	2.54644	-1.9681	24	2.16547	0.0626239	0.0607134	-1.0789	0.093491	0	1	0	1	0	0	0			0
1041	WBGene00001395	4.008	4.78667	4.58367	4.50433	4.74433	4.78067	4.57467	4.97933	4	4	4.47067	4.76975	0.330565	0.16608	1.49542	1.56184	0.0758515	0.0347661	0.241915	0.242954	0.0554512	0.0501944	1.74466	24	1.0086	1.77615	24	1.22043	0.0938384	0.0883891	1.0669	0.122018	0	0	1	1	0	0	0			0
1042	WBGene00001396	5.804	5.655	5.596	5.683	5.69	5.446	5.374	5.761	4	4	5.6845	5.56775	0.0875309	0.186773	1.73765	1.71657	0.015342	0.0335584	0.144111	0.213306	0.024882	0.0380859	-0.90706	24	2.19084	-0.926985	24	2.34292	0.373393	0.363163	-1.02097	0.288133	0	0	0	0	0	0	0			0
1043	WBGene00001397	2.756	3.864	3.577	4.304	2.847	3.286	3.548	4.676	4	4	3.62525	3.58925	0.65208	0.78009	1.27489	1.26119	0.189891	0.208517	0.431381	0.500016	0.128368	0.135112	-0.109028	24	1.34353	-0.146989	24	1.10783	0.914087	0.884368	-1.01003	0.473404	0	0	0	0	0	1	0			0
1044	WBGene00001398	4.77	5.655	5.516	5.664	4.784	5.451	5.211	5.821	4	4	5.40125	5.31675	0.426251	0.434855	1.68417	1.66833	0.0821141	0.0823776	0.262938	0.324946	0.0509644	0.0617048	-0.404303	24	1.52728	-0.395786	24	1.4659	0.68957	0.695759	-1.01589	0.408485	0	0	0	1	0	1	0			0
1045	WBGene00001399	4.283	4.082	4.258	4.684	4	3.655	4.114	4.636	4	4	4.32675	4.10125	0.254408	0.406411	1.46355	1.40766	0.0578453	0.0981033	0.266485	0.343727	0.0545429	0.0883725	-1.03695	24	1.66372	-1.07634	24	2.62517	0.310093	0.292475	-1.05498	0.258736	0	0	1	0	0	1	0			0
1046	WBGene00001400	1.667	1.568	1.288	1.118	1.51	1.311	1.51	1.361	4	4	1.41025	1.423	0.252429	0.102512	0.331365	0.350807	0.183261	0.0724164	0.24388	0.221891	0.17119	0.159228	0.077339	24	1.20802	0.166323	24	1.15589	0.938995	0.869296	1.00904	0.480494	0	0	0	0	0	0	0			0
1047	WBGene00001401	3.91085	3.491	3.91992	3.99923	2.66938	2.49738	3.10269	3.29254	4	4	3.83025	2.8905	0.229624	0.369726	1.34153	1.05526	0.0617149	0.12849	0.274196	0.345824	0.074522	0.117574	-4.25866	24	1.5907	-4.11308	24	2.48915	0.000273574	0.000395794	-1.32512	0.00213991	0	0	0	0	0	0	1			0
1048	WBGene00001402	3.82027	3.4522	3.82827	3.97547	2.67953	2.44313	3.14247	3.36867	4	4	3.76905	2.90845	0.222959	0.422487	1.32547	1.05961	0.0604749	0.146544	0.32147	0.384689	0.0795898	0.126165	-3.43329	24	1.43199	-3.56448	24	2.51283	0.00217218	0.00157029	-1.2959	0.00906273	0	0	0	0	0	0	1			0
1049	WBGene00001403	2.36694	3.13475	2.80475	2.75687	4.12263	4.08575	3.48513	3.5085	4	4	2.76583	3.8005	0.314543	0.351121	1.01239	1.33192	0.115529	0.0925764	0.350886	0.333337	0.132633	0.0863076	4.2757	24	1.10806	4.03853	24	2.36159	0.000261986	0.000478	1.37409	0.00207345	1	1	0	0	0	0	0		177788	0
1050	WBGene00001404	5.498	5.331	5.568	5.582	5.802	5.451	5.63	5.466	4	4	5.49475	5.58725	0.115185	0.16453	1.70363	1.72016	0.0211276	0.0292746	0.159964	0.213234	0.029658	0.0378864	0.694012	24	1.77691	0.687447	24	1.63186	0.494338	0.498391	1.01683	0.339319	0	1	1	1	0	0	0			0
1051	WBGene00001405	4.34967	4.24867	4.53283	4.55567	3.755	3.524	3.88333	4.05017	4	4	4.42171	3.80313	0.147679	0.221878	1.48611	1.33453	0.0335145	0.0587718	0.200668	0.308691	0.0444292	0.0810292	-3.36021	24	2.36641	-3.2804	24	3.32618	0.0025995	0.00315934	-1.16265	0.0103765	0	0	0	0	0	0	0			0
1052	WBGene00001406	4.147	4.132	4.4	4.487	3.497	3.281	3.961	4.116	4	4	4.2915	3.71375	0.179177	0.39038	1.45598	1.30786	0.0416888	0.105872	0.232719	0.394973	0.0548823	0.101404	-2.52054	24	2.88053	-2.56932	24	3.41388	0.0187745	0.0168295	-1.15557	0.0410644	0	0	0	0	0	0	0			0
1053	WBGene00001410	2.74929	3.55624	2.71347	2.68824	2.80594	3.572	2.61247	2.57865	4	4	2.92681	2.89226	0.420365	0.464088	1.06679	1.05311	0.134923	0.151307	0.360517	0.379218	0.138664	0.126814	-0.132039	24	1.10643	-0.145641	24	1.19562	0.896054	0.885421	-1.01194	0.468024	0	0	0	0	0	0	0			0
1054	WBGene00001411	4.818	4.61614	4.43307	4.59686	4.34407	4.09429	4.10229	4.201	4	4	4.61602	4.18541	0.157727	0.116376	1.5291	1.43132	0.0340882	0.0275974	0.207382	0.255008	0.0452031	0.0656029	-2.62015	24	1.51205	-2.45463	24	2.10625	0.0150043	0.0217349	-1.10288	0.0352722	0	0	1	0	0	0	0			0
1055	WBGene00001412	5.51586	5.44343	5.59571	5.67286	5.33529	5.15086	5.49	5.44171	4	4	5.55696	5.35446	0.0991848	0.15034	1.71493	1.67763	0.0178469	0.0282936	0.138681	0.242048	0.0250192	0.0467911	-1.45181	24	3.04626	-1.40597	24	3.49768	0.159502	0.172547	-1.03782	0.170909	0	0	0	0	0	0	0			0
1056	WBGene00001413	5.157	4.694	4.924	5.323	3.765	3.069	3.888	4.411	4	4	5.0245	3.78325	0.274463	0.552428	1.6132	1.32227	0.0548963	0.150376	0.208648	0.400136	0.042002	0.108584	-5.50117	24	3.67779	-4.99768	24	6.68326	1.18e-05	4.18e-05	-1.32809	0.000228376	0	0	0	0	0	0	1	enriched in other tissue		0
1057	WBGene00001414	1.96052	2.54504	2.35811	1.95334	1.75509	1.99333	2.08738	1.75501	4	4	2.20425	1.8977	0.295621	0.169139	0.783689	0.637678	0.133386	0.0888287	0.312033	0.24815	0.140448	0.123313	-1.53784	24	1.58114	-1.56245	24	1.29721	0.13717	0.131273	-1.16154	0.155264	0	0	0	0	0	0	0			0
1058	WBGene00001423	5.794	5.807	5.752	5.971	6.043	5.951	6.048	6.086	4	4	5.831	6.032	0.0962393	0.057312	1.76309	1.79704	0.016396	0.00953129	0.123836	0.174809	0.0212049	0.0287286	1.87651	24	1.99265	1.90201	24	1.83551	0.072797	0.0692386	1.03447	0.103663	0	0	0	1	0	0	0			0
1059	WBGene00001424	2.144	3.313	3.738	3.031	2.389	2.608	2.933	1.831	4	4	3.0565	2.44025	0.674176	0.463593	1.09699	0.877587	0.238867	0.200302	0.462654	0.358611	0.166187	0.153253	-2.10553	24	1.66443	-1.94111	24	1.17592	0.0458942	0.0640768	-1.25254	0.0759427	0	0	0	0	0	0	0			0
1060	WBGene00001425	3.304	2.357	3.024	2.93	3.245	2.027	2.824	2.626	4	4	2.90375	2.6805	0.397612	0.506388	1.05853	0.971822	0.143409	0.197443	0.37916	0.39736	0.131268	0.150021	-0.812951	24	1.09831	-0.869904	24	1.30614	0.424238	0.392971	-1.08329	0.310145	0	0	0	0	0	0	0			0
1061	WBGene00001426	4.976	5.058	5.251	5.227	5.478	5.137	5.423	5.371	4	4	5.128	5.35225	0.132833	0.150003	1.63446	1.67722	0.0259583	0.0283346	0.17946	0.241322	0.0352129	0.0462578	1.49134	24	1.80825	1.47087	24	1.7257	0.148901	0.154318	1.04373	0.163761	0	0	0	1	0	0	0			0
1062	WBGene00001427	5.453	5.382	5.435	5.674	5.489	5.533	5.295	5.481	4	4	5.486	5.4495	0.128906	0.105507	1.70199	1.69538	0.0232747	0.0195254	0.166073	0.242304	0.0303921	0.0443009	-0.248508	24	2.12875	-0.246194	24	2.12473	0.805856	0.807625	-1.0067	0.443628	0	0	0	0	0	0	0			0
1063	WBGene00001428	3.916	4.431	4.187	4.213	4.107	4.708	4.316	4.386	4	4	4.18675	4.37925	0.211071	0.24916	1.43096	1.47568	0.0507273	0.056473	0.280008	0.309343	0.068627	0.0676822	0.922708	24	1.2205	0.927751	24	1.02811	0.365343	0.362774	1.04598	0.284359	0	0	0	0	0	0	0			0
1064	WBGene00001429	3.093	4.117	3.198	3.276	3.049	3.791	3.085	3.076	4	4	3.421	3.25025	0.470019	0.360824	1.22335	1.17441	0.130002	0.1056	0.405147	0.337949	0.109539	0.103534	-0.647281	24	1.43722	-0.649493	24	1.11937	0.523594	0.522188	-1.05253	0.350706	0	0	1	0	0	0	0			0
1065	WBGene00001430	4.72	4.861	4.688	4.025	4.996	4.057	4.857	4.136	4	4	4.5735	4.5115	0.37331	0.483626	1.51765	1.50231	0.0848836	0.107398	0.269785	0.341785	0.058994	0.0768621	-0.284775	24	1.60499	-0.316602	24	1.6975	0.778259	0.754283	-1.01374	0.436402	0	1	1	0	0	0	0			0
1066	WBGene00001431	4.56671	4.38557	4.588	4.73671	4.36314	4.05371	4.45343	4.59029	4	4	4.56925	4.36514	0.143921	0.227651	1.51898	1.47261	0.0315992	0.0529295	0.197764	0.296699	0.0463957	0.0648749	-1.14484	24	2.2508	-1.16264	24	1.95523	0.263564	0.256407	-1.04676	0.234932	0	0	0	0	0	0	0			0
1067	WBGene00001432	3.585	4.517	3.397	3.603	3.592	3.65	2.938	3.281	4	4	3.7755	3.36525	0.503034	0.327688	1.32232	1.20983	0.126526	0.0997875	0.385946	0.330576	0.101941	0.104642	-1.61462	24	1.36304	-1.53999	24	1.05368	0.119464	0.136644	-1.12191	0.142399	0	0	0	0	0	0	0			0
1068	WBGene00001433	4.157	3.849	4.111	3.973	4	4.057	4.114	4.096	4	4	4.0225	4.06675	0.139613	0.0504604	1.39145	1.40279	0.0348894	0.0124425	0.28128	0.261688	0.0646389	0.0620594	0.230357	24	1.15534	0.253047	24	1.08485	0.819767	0.802387	1.011	0.4476	0	1	0	0	0	0	0			0
1069	WBGene00001434	2.239	2.17	1.17	1.575	1.751	1.903	1.284	1.486	4	4	1.7885	1.606	0.508795	0.275268	0.548004	0.462422	0.305314	0.17498	0.329061	0.2447	0.193343	0.164196	-0.890086	24	1.80836	-0.674788	24	1.38654	0.382255	0.506259	-1.11364	0.291946	0	1	1	0	0	0	0			0
1070	WBGene00001435	3.16967	2.419	2.56467	3.047	2.44267	1.82467	2.20267	2.64267	4	4	2.80008	2.27817	0.364328	0.351797	1.02324	0.813986	0.130974	0.16015	0.337107	0.323589	0.129551	0.143089	-2.23385	24	1.0853	-2.16819	24	1.21991	0.0350727	0.0402823	-1.2291	0.0630791	0	0	0	0	0	0	0			0
1071	WBGene00001436	3.005	2.28157	2.6937	2.94783	2.61822	1.92213	2.37996	2.73426	4	4	2.73202	2.41364	0.329378	0.359335	0.99928	0.872218	0.125674	0.156953	0.347064	0.350021	0.134699	0.131547	-1.29182	24	1.01711	-1.34974	24	1.04851	0.208722	0.189695	-1.13191	0.202685	0	0	0	0	0	0	0			0
1072	WBGene00001437	2.26878	1.82856	1.78556	2.03289	1.852	1.72578	1.66389	1.67433	4	4	1.97894	1.729	0.221306	0.0863468	0.677989	0.546629	0.10976	0.0490872	0.288888	0.226391	0.138233	0.126819	-1.36199	24	1.62832	-1.40047	24	1.18811	0.185848	0.17417	-1.14456	0.188587	0	0	0	0	0	0	0			0
1073	WBGene00001438	2.706	3.06	2.901	2.603	3.301	3.069	3.203	3.001	4	4	2.8175	3.1435	0.203487	0.134416	1.0339	1.14465	0.0720081	0.0426898	0.341733	0.303625	0.116033	0.100946	1.42629	24	1.26677	1.44021	24	1.32125	0.166665	0.162726	1.11571	0.175661	0	0	0	0	0	0	0			0
1074	WBGene00001439	3.65978	4.0007	3.70356	3.33159	4.25311	4.44052	4.02119	3.78674	4	4	3.67391	4.12539	0.273894	0.283526	1.29915	1.41538	0.0750315	0.0691055	0.313421	0.29903	0.0788748	0.074142	2.08446	24	1.09856	2.14727	24	1.13174	0.0479328	0.0420832	1.12289	0.0782859	0	0	0	0	0	0	0			0
1075	WBGene00001440	2.616	2.595	2.461	2.296	2.461	2.212	2.411	2.496	4	4	2.492	2.395	0.147605	0.126888	0.911742	0.872299	0.0601619	0.0541691	0.282823	0.255466	0.117045	0.107444	-0.509027	24	1.22564	-0.496509	24	1.1867	0.615382	0.624052	-1.0405	0.383627	0	0	0	0	0	0	0			0
1076	WBGene00001441	5.232	5.544	4.816	4.472	5.69	5.934	5.074	4.731	4	4	5.016	5.35725	0.46953	0.552504	1.60932	1.67442	0.0941353	0.103964	0.28822	0.362186	0.0575616	0.0684884	1.47449	24	1.57912	1.45524	24	1.41569	0.153347	0.15856	1.06803	0.16671	0	0	0	0	0	0	0			0
1077	WBGene00001442	2.792	2.539	2.697	2.661	2.182	2.185	2.047	2.171	4	4	2.67225	2.14625	0.104618	0.0664398	0.982343	0.763355	0.0393258	0.0314417	0.303107	0.258187	0.121737	0.123104	-2.64213	24	1.37824	-2.52973	24	1.02258	0.0142736	0.0183928	-1.24508	0.0339754	0	0	0	0	0	0	0			0
1078	WBGene00001443	4.45431	4.10992	4.24067	4.27923	4.43769	4.04446	4.11458	4.28888	4	4	4.27103	4.2214	0.14205	0.177064	1.45144	1.43951	0.0331549	0.0417809	0.247717	0.278062	0.0554879	0.0651471	-0.266541	24	1.26001	-0.278853	24	1.37846	0.7921	0.782746	-1.01176	0.439856	0	0	1	0	0	0	0			0
1079	WBGene00001444	4.669	5.261	5.01	4.929	5.108	5.517	4.645	4.531	4	4	4.96725	4.95025	0.243949	0.452784	1.60196	1.59634	0.0492112	0.0905131	0.197202	0.344706	0.0431916	0.0700461	-0.0856147	24	3.05545	-0.136477	24	2.63008	0.932483	0.892583	-1.00343	0.478716	0	0	1	0	0	0	0			0
1080	WBGene00001445	3.208	3.981	3.761	3.535	3.346	4.279	3.735	3.671	4	4	3.62125	3.75775	0.330235	0.38699	1.28364	1.31992	0.0924263	0.10143	0.339312	0.377497	0.0956204	0.0943142	0.537847	24	1.23774	0.540246	24	1.02789	0.595635	0.594006	1.03769	0.377066	0	0	0	0	0	0	0			0
1081	WBGene00001446	4.213	4.81	4.461	4.295	4.191	4.594	4.404	4.391	4	4	4.44475	4.395	0.264452	0.164635	1.49042	1.47994	0.0585531	0.0375227	0.234402	0.288175	0.0463238	0.0613599	-0.267855	24	1.51144	-0.272727	24	1.75453	0.791099	0.787396	-1.01132	0.439509	0	0	0	0	0	0	0			0
1082	WBGene00001447	3.173	3.869	3.908	3.66	3.497	4.079	3.474	3.626	4	4	3.6525	3.669	0.337703	0.2814	1.29204	1.2978	0.0960078	0.0744548	0.368067	0.324969	0.0913241	0.0894463	0.0672102	24	1.28283	0.0900863	24	1.04243	0.946971	0.928966	1.00452	0.482424	0	0	0	0	0	0	0			0
1083	WBGene00001448	4.268	4.846	4.679	4.194	4.039	4.697	4.119	4.091	4	4	4.49675	4.2365	0.315793	0.308784	1.50151	1.44183	0.0701037	0.0705326	0.238341	0.28073	0.0546695	0.0699376	-1.4134	24	1.38733	-1.34459	24	1.63655	0.170377	0.191328	-1.06143	0.178322	0	0	0	0	0	0	0			0
1084	WBGene00001449	4.845	5.281	5.019	5.01	4.347	4.865	4.34	4.426	4	4	5.03875	4.4945	0.180223	0.250059	1.61668	1.50173	0.0355422	0.0542908	0.180246	0.268663	0.0364337	0.0617485	-3.3645	24	2.22168	-3.20665	24	2.87241	0.00257228	0.00377938	-1.12109	0.0103046	0	0	0	0	0	0	0			0
1085	WBGene00001450	3.806	4.365	4.206	3.973	2.976	4.258	3.622	3.846	4	4	4.0875	3.6755	0.247252	0.53558	1.40656	1.29336	0.0606146	0.150778	0.342211	0.386641	0.0746403	0.112589	-1.59587	24	1.27652	-1.67597	24	2.27534	0.123603	0.106725	-1.11209	0.14525	0	0	0	0	0	0	0			0
1086	WBGene00001451	3.088	3.773	3.714	3.66	4.179	4.041	3.469	3.321	4	4	3.55875	3.7525	0.317208	0.42099	1.26624	1.31767	0.0933085	0.112661	0.352775	0.374098	0.095023	0.0967619	0.753601	24	1.12454	0.75849	24	1.03694	0.458419	0.455542	1.05444	0.324562	0	0	0	0	0	0	0			0
1087	WBGene00001452	4.248	5.094	5.222	5.001	4.991	5.582	5.079	4.881	4	4	4.89125	5.13325	0.438299	0.309938	1.58426	1.63441	0.0935657	0.0590436	0.281864	0.272233	0.0594773	0.0526486	1.23512	24	1.07201	1.26283	24	1.27623	0.228741	0.218782	1.04948	0.2148	0	0	0	0	0	0	0			0
1088	WBGene00001453	4.775	4.851	4.783	4.41	5.483	6	5.699	4.966	4	4	4.70475	5.537	0.199436	0.435725	1.54788	1.70908	0.0432542	0.0800001	0.189847	0.300206	0.0398195	0.0545914	4.68612	24	2.50054	4.77126	24	1.87957	9.22e-05	7.43e-05	1.1769	0.00100749	1	0	0	0	0	0	0		177574	0
1089	WBGene00001454	4.659	5.321	5.052	4.837	4.901	5.484	4.68	4.356	4	4	4.96725	4.85525	0.285368	0.475178	1.60164	1.57653	0.0572228	0.0965957	0.210641	0.347918	0.0450532	0.0736424	-0.550755	24	2.72815	-0.58157	24	2.67181	0.586892	0.566279	-1.02307	0.373718	0	0	0	0	0	0	0			0
1090	WBGene00001455	3.248	4.001	3.823	3.569	3.609	4.111	3.809	3.381	4	4	3.66025	3.7275	0.327045	0.309741	1.29448	1.31316	0.0907272	0.0828535	0.345275	0.332213	0.0876787	0.0902215	0.280708	24	1.08018	0.297004	24	1.05884	0.78134	0.769019	1.01837	0.437121	0	0	1	0	0	0	0			0
1091	WBGene00001456	3.751	4.299	4.059	3.708	3.301	3.91	3.577	3.656	4	4	3.95425	3.611	0.277954	0.250787	1.37296	1.28216	0.0697053	0.0697973	0.303071	0.312619	0.0846679	0.0904193	-1.57667	24	1.064	-1.46594	24	1.14047	0.127963	0.155646	-1.09506	0.148571	0	0	0	0	0	0	0			0
1092	WBGene00001457	2.073	2.615	2.915	2.598	2.103	2.76	2.637	2.391	4	4	2.55025	2.47275	0.349897	0.290338	0.928718	0.899987	0.143235	0.120365	0.321758	0.327343	0.127895	0.133276	-0.33769	24	1.03501	-0.311084	24	1.08592	0.738533	0.758423	-1.03134	0.424087	0	0	0	0	0	0	0			0
1093	WBGene00001458	4.037	5.114	4.679	4.184	4.347	5.007	4.439	4.646	4	4	4.5035	4.60975	0.49099	0.292868	1.50046	1.52669	0.107887	0.0625957	0.30462	0.273998	0.0693418	0.0598879	0.51865	24	1.23601	0.572576	24	1.34064	0.608754	0.572257	1.02359	0.381624	0	0	0	0	0	0	0			0
1094	WBGene00001459	3.118	3.794	3.515	3.098	3.312	3.292	3.164	2.926	4	4	3.38125	3.1735	0.335551	0.177549	1.2146	1.15363	0.0982195	0.057053	0.334182	0.319514	0.10387	0.110057	-0.898671	24	1.09392	-0.805803	24	1.12266	0.377756	0.428269	-1.06546	0.290023	0	0	0	0	0	0	0			0
1095	WBGene00001460	3.464	4.299	4.494	4.174	3.547	4.616	4.311	4.236	4	4	4.10775	4.1775	0.448913	0.451315	1.40811	1.42511	0.114551	0.112294	0.347916	0.329554	0.0875874	0.0834145	0.291098	24	1.11454	0.281084	24	1.10256	0.773477	0.781055	1.01698	0.435106	0	0	0	1	0	0	0			0
1096	WBGene00001461	4.77	5.104	5.185	5.049	5.024	5.43	4.601	4.636	4	4	5.027	4.92275	0.180209	0.388717	1.61433	1.59157	0.0363351	0.0778508	0.184297	0.338434	0.0366476	0.068009	-0.541051	24	3.37216	-0.589219	24	3.44384	0.593459	0.56122	-1.02118	0.376442	0	0	0	0	0	0	0			0
1097	WBGene00001462	3.474	4.335	4.168	4.045	3.933	4.686	4.153	4.131	4	4	4.0055	4.22575	0.373733	0.322388	1.38424	1.43908	0.0968624	0.0744767	0.313807	0.306485	0.0898104	0.0718573	1.00423	24	1.04835	0.953695	24	1.56211	0.325285	0.349746	1.05499	0.26557	0	0	0	0	0	0	0			0
1098	WBGene00001463	3.484	4.127	3.596	3.487	2.892	3.46	3.11	3.056	4	4	3.6735	3.1295	0.30679	0.239039	1.29865	1.13874	0.0806225	0.0750423	0.31964	0.306791	0.0797883	0.104293	-2.45572	24	1.08552	-2.43558	24	1.70856	0.0216824	0.0226676	-1.17383	0.0453726	0	0	0	0	0	0	0			0
1099	WBGene00001464	3.028	4.471	4.3	4.078	2.629	3.563	3.346	3.256	4	4	3.96925	3.1985	0.647798	0.400938	1.36743	1.15637	0.177082	0.132015	0.418548	0.394828	0.125517	0.125546	-2.67906	24	1.12376	-2.37782	24	1.00046	0.0131208	0.0257268	-1.24097	0.0319806	0	0	1	0	0	0	0			0
1100	WBGene00001465	2.654	3.33983	3.56417	3.35033	2.5695	2.94817	3.273	3.4435	4	4	3.22708	3.05854	0.395792	0.38537	1.16549	1.11177	0.129784	0.129358	0.380863	0.396267	0.116711	0.112516	-0.6133	24	1.08253	-0.662766	24	1.07595	0.545447	0.513796	-1.05511	0.359243	0	0	0	1	0	1	0			0
1101	WBGene00001466	3.58	4.446	3.998	3.934	3.429	3.954	3.479	3.441	4	4	3.9895	3.57575	0.355544	0.253066	1.3807	1.27238	0.0887555	0.0685128	0.302791	0.324086	0.0859052	0.0959101	-1.86574	24	1.14561	-1.68268	24	1.24649	0.0743478	0.105403	-1.11571	0.105149	0	0	0	0	0	0	0			0
1102	WBGene00001468	2.085	2.88886	3.04786	2.67257	1.96857	2.30257	2.61157	2.42457	4	4	2.67357	2.32682	0.421448	0.270536	0.973277	0.839235	0.167908	0.119687	0.361231	0.31309	0.144134	0.129283	-1.45074	24	1.33116	-1.38459	24	1.24295	0.159796	0.178917	-1.14902	0.171129	0	0	0	0	0	1	0			0
1103	WBGene00001470	3.81574	3.67184	3.46181	3.64126	4.2049	4.15348	4.22745	4.38906	4	4	3.64766	4.24373	0.145394	0.101717	1.29349	1.44523	0.0400397	0.0237698	0.325556	0.246938	0.0784645	0.0609513	2.9175	24	1.7381	3.05449	24	1.65722	0.00754318	0.00545024	1.16341	0.0218739	0	0	1	0	0	0	0			0
1104	WBGene00001475	2.82106	3.65559	2.29491	2.64917	2.55235	3.26182	2.11526	2.74984	4	4	2.85518	2.66982	0.576818	0.475464	1.03458	0.970005	0.194671	0.179481	0.435237	0.389554	0.148709	0.144182	-0.634688	24	1.24829	-0.623492	24	1.06377	0.531636	0.538843	-1.06943	0.354027	0	0	0	0	0	0	0			0
1105	WBGene00001476	3.55129	3.66143	3.57757	3.04786	3.31329	3.39329	3.36729	2.97457	4	4	3.45954	3.26211	0.278442	0.194565	1.23857	1.18099	0.0837721	0.0614014	0.316206	0.29758	0.0966689	0.10193	-0.909364	24	1.1291	-0.819831	24	1.11182	0.3722	0.42038	-1.06052	0.287592	0	0	0	0	0	0	0			0
1106	WBGene00001477	4.34909	4.05845	4.722	3.10245	4.35036	3.73873	4.24373	3.04555	4	4	4.058	3.84459	0.692507	0.595762	1.3888	1.33703	0.181924	0.163016	0.43346	0.404818	0.112035	0.112194	-0.719642	24	1.14651	-0.652993	24	1.00284	0.478695	0.519968	-1.05551	0.333122	0	0	1	0	0	0	0			0
1107	WBGene00001478	2.80837	3.0165	3.09725	2.73875	2.73488	2.6265	2.726	2.69537	4	4	2.91522	2.69569	0.169263	0.0491308	1.06868	0.991528	0.0580862	0.0183425	0.312537	0.305201	0.113641	0.112787	-1.00509	24	1.04865	-0.96374	24	1.01519	0.324879	0.344787	-1.08144	0.265458	0	0	0	0	0	0	0			0
1108	WBGene00001479	3.9831	4.3018	4.4461	3.9956	4.5945	4.3973	4.5558	3.9545	4	4	4.18165	4.37552	0.229787	0.293363	1.42958	1.47428	0.0547583	0.0689518	0.3083	0.313295	0.0668163	0.0698322	0.882156	24	1.03267	0.924954	24	1.09231	0.386443	0.364197	1.04636	0.293743	0	0	1	0	0	0	0			0
1109	WBGene00001480	2.87471	2.81457	3.11129	2.73	2.94586	2.59714	2.96314	2.78314	4	4	2.88264	2.82232	0.163579	0.170619	1.05753	1.03616	0.0558544	0.0613927	0.335584	0.314147	0.111661	0.110934	-0.262451	24	1.14113	-0.271468	24	1.01314	0.795214	0.788352	-1.02137	0.440626	0	0	0	0	0	0	0			0
1110	WBGene00001481	3.11693	3.19973	2.87967	2.93307	2.80487	2.85487	2.58193	2.849	4	4	3.03235	2.77267	0.150931	0.129099	1.10841	1.01897	0.0497246	0.0476138	0.325664	0.326696	0.103495	0.101021	-1.1259	24	1.00634	-1.23682	24	1.04958	0.271339	0.22812	-1.09366	0.238984	0	0	0	0	0	0	0			0
1111	WBGene00001482	4.549	4.259	4.537	4.65	3.664	3.053	4.094	4.191	4	4	4.49875	3.7505	0.167675	0.518337	1.50327	1.31429	0.0378005	0.144527	0.202174	0.406022	0.0432721	0.107225	-3.29936	24	4.03319	-3.26884	24	6.1401	0.0030166	0.0032496	-1.19951	0.0114767	0	0	0	0	0	0	0			0
1112	WBGene00001483	2.656	3.055	2.934	2.55	2.428	2.662	2.751	2.376	4	4	2.79875	2.55425	0.23538	0.180769	1.02652	0.935882	0.0842188	0.0707162	0.305808	0.359254	0.110667	0.124965	-1.03649	24	1.38008	-1.08592	24	1.27509	0.310306	0.2883	-1.09572	0.258866	0	0	0	0	0	0	0			0
1113	WBGene00001484	3.4945	3.4345	3.061	3.24	3.575	3.783	3.26	3.266	4	4	3.3075	3.471	0.196991	0.254759	1.19484	1.24244	0.0601691	0.0728095	0.367282	0.31749	0.103061	0.0854244	0.673552	24	1.33825	0.71118	24	1.45554	0.507031	0.483828	1.04943	0.344219	0	0	0	0	0	0	0			0
1114	WBGene00001485	4.4002	4.2726	4.174	4.2291	3.5257	3.531	3.7089	3.939	4	4	4.26898	3.67615	0.0963387	0.194822	1.45118	1.30083	0.0224462	0.0523221	0.238477	0.297574	0.0538157	0.086853	-3.10915	24	1.55702	-2.94308	24	2.60466	0.0047813	0.00710149	-1.16126	0.0158262	0	0	0	0	0	0	0			0
1115	WBGene00001487	1.95733	2.05667	2.33933	1.66633	1.68917	1.80583	2.02	1.77767	4	4	2.00492	1.82317	0.277738	0.140321	0.68829	0.598414	0.140269	0.0753877	0.288409	0.214942	0.145004	0.124769	-1.01058	24	1.80043	-0.939663	24	1.35065	0.322298	0.356752	-1.09969	0.264475	0	0	1	0	0	0	0			0
1116	WBGene00001488	4.44918	4.83073	4.63355	4.50844	5.38371	5.77984	5.35233	5.29789	4	4	4.60548	5.45344	0.168694	0.220468	1.52675	1.69565	0.0363398	0.0397109	0.205494	0.2583	0.0434809	0.047128	5.13807	24	1.57998	5.26808	24	1.17479	2.93e-05	2.11e-05	1.18412	0.000437415	1	0	0	0	0	0	0		173360	0
1117	WBGene00001489	3.113	3.434	3.194	3.161	3.189	3.324	3.026	3.086	4	4	3.2255	3.15625	0.142923	0.130528	1.17037	1.14875	0.0435358	0.0411065	0.327616	0.302855	0.100565	0.0955185	-0.310431	24	1.1702	-0.311762	24	1.10846	0.758913	0.757914	-1.02194	0.430777	0	0	1	0	0	0	0			0
1118	WBGene00001490	2.5947	3.12453	2.72879	2.56474	4.45837	4.45781	4.27091	4.07135	4	4	2.75319	4.31461	0.257633	0.184627	1.00962	1.46131	0.0905368	0.0432432	0.34087	0.287479	0.125522	0.0632928	7.00327	24	1.40594	6.42631	24	3.93305	3.06e-07	1.21e-06	1.56713	1.51e-05	1	1	1	0	0	0	0	muscle-enriched	181346	0
1119	WBGene00001491	5.217	5.089	5.166	5.222	4.856	4.779	4.887	4.696	4	4	5.1735	4.8045	0.0617549	0.085403	1.6435	1.56943	0.0119787	0.0178285	0.165214	0.222287	0.0303096	0.0470447	-2.66464	24	1.81023	-2.6468	24	2.40913	0.0135603	0.0141226	-1.0768	0.0327031	0	0	0	1	0	0	0			0
1120	WBGene00001492	3.85639	4.00668	3.44224	3.4642	3.54561	3.72305	3.23071	3.43978	4	4	3.69238	3.48479	0.283032	0.205791	1.30407	1.24709	0.0764485	0.0593487	0.328139	0.29132	0.0869351	0.0871726	-0.946185	24	1.26875	-0.925725	24	1.00547	0.353484	0.363804	-1.05957	0.27878	0	1	1	0	0	0	0			0
1121	WBGene00001493	4.59917	4.57452	4.24445	4.13597	4.62303	4.35183	4.07514	3.956	4	4	4.38853	4.2515	0.233459	0.298064	1.47793	1.44545	0.0533665	0.0696041	0.252906	0.290718	0.0548134	0.069244	-0.711216	24	1.32137	-0.735591	24	1.59584	0.483806	0.469108	-1.03223	0.335494	0	0	0	0	0	0	0			0
1122	WBGene00001494	3.18979	3.82436	3.06839	3.11986	3.135	3.79196	2.87707	2.946	4	4	3.3006	3.18751	0.352699	0.417461	1.19007	1.15318	0.102124	0.125152	0.408345	0.358531	0.115212	0.121209	-0.416224	24	1.29718	-0.441164	24	1.10681	0.680945	0.663043	-1.03548	0.405837	0	0	0	0	0	0	0			0
1123	WBGene00001495	2.37833	3.25893	2.65541	2.44974	2.50393	3.9443	2.47616	2.52633	4	4	2.6856	2.86268	0.399863	0.721368	0.980094	1.0309	0.142054	0.227726	0.376976	0.472525	0.136051	0.157469	0.585888	24	1.57117	0.488303	24	1.33964	0.56342	0.629767	1.06594	0.36566	0	0	0	0	0	0	0			0
1124	WBGene00001496	4.072	3.8804	3.9864	3.8726	4.0338	3.6876	3.721	3.672	4	4	3.95285	3.7786	0.0948883	0.171357	1.37422	1.3286	0.023917	0.0444156	0.269173	0.306818	0.0784773	0.0822898	-0.85384	24	1.29926	-0.802354	24	1.09952	0.401636	0.430222	-1.04611	0.300508	0	0	0	0	0	0	0			0
1125	WBGene00001497	4.35325	4.07825	4.24125	4.41475	3.715	3.47625	3.8765	4.12225	4	4	4.27187	3.7975	0.14772	0.271853	1.4516	1.33242	0.0348371	0.071734	0.23845	0.322383	0.055863	0.0838711	-2.36605	24	1.82789	-2.36541	24	2.25411	0.0263954	0.026432	-1.12492	0.0517673	0	0	0	0	0	0	0			0
1126	WBGene00001498	4.98477	4.76315	4.84408	5.04962	4.40869	4.20123	4.43569	4.62369	4	4	4.9104	4.41733	0.130374	0.172912	1.59109	1.48496	0.0265775	0.0392436	0.186082	0.275477	0.0376272	0.0661722	-2.96644	24	2.1916	-2.7885	24	3.09276	0.00671991	0.0101977	-1.11162	0.020136	0	0	0	0	0	0	0			0
1127	WBGene00001499	5.583	5.316	5.284	5.438	4.431	3.775	4.045	4.601	4	4	5.40525	4.213	0.135812	0.373335	1.68714	1.4352	0.0250005	0.0894008	0.169232	0.331889	0.0307213	0.0755917	-6.40056	24	3.84609	-6.17531	24	6.05439	1.28e-06	2.22e-06	-1.28299	4.35e-05	0	0	0	0	0	0	0	expressed in other tissue		0
1128	WBGene00001500	2.495	3.156	2.683	2.382	2.54	2.505	2.559	2.126	4	4	2.679	2.4325	0.341375	0.205554	0.979618	0.886078	0.123271	0.0883336	0.361846	0.287396	0.132309	0.127356	-1.06689	24	1.5852	-1.01871	24	1.07929	0.296638	0.318502	-1.10134	0.252127	0	0	0	0	0	1	0			0
1129	WBGene00001501	5.413	5.453	5.43	5.318	5.662	5.234	5.162	5.066	4	4	5.4035	5.281	0.0593099	0.263158	1.687	1.66321	0.0110236	0.0489094	0.157501	0.267167	0.0285109	0.050483	-0.789975	24	2.87739	-0.820809	24	3.13523	0.437279	0.419834	-1.0232	0.315909	0	0	0	1	0	0	0			0
1130	WBGene00001502	4.865	5.316	5.147	4.862	5.562	5.804	5.92	5.671	4	4	5.0475	5.73925	0.22339	0.155926	1.61816	1.74705	0.0440578	0.0271679	0.190641	0.208296	0.0379969	0.0356685	4.89965	24	1.19379	4.94629	24	1.13482	5.36e-05	4.76e-05	1.13705	0.000677554	1	1	0	0	0	0	0		181348	0
1131	WBGene00001503	5.0567	4.9317	4.9113	4.9433	5.7383	5.6653	5.4864	5.3145	4	4	4.96075	5.55112	0.06532	0.189957	1.60149	1.71356	0.0130927	0.034393	0.162013	0.219175	0.0357897	0.0386937	4.33216	24	1.83012	4.25236	24	1.16887	0.00022697	0.000277988	1.11901	0.00187295	1	0	0	0	0	0	0		176059	0
1132	WBGene00001505	2.013	3.09	3.161	2.911	2.243	2.5	2.603	2.681	4	4	2.79375	2.50675	0.531023	0.19082	1.0118	0.91674	0.210994	0.0780647	0.398127	0.298073	0.156236	0.129537	-1.15413	24	1.78401	-0.936733	24	1.4547	0.259812	0.358227	-1.11449	0.232661	0	0	0	0	0	0	0			0
1133	WBGene00001506	2.34	3.232	2.915	2.089	1.963	2.288	2.155	1.816	4	4	2.644	2.0555	0.522694	0.208065	0.957452	0.716645	0.199494	0.101857	0.407443	0.289528	0.157058	0.137857	-2.35477	24	1.9804	-2.30462	24	1.29795	0.0270505	0.0301487	-1.28631	0.0527845	0	0	0	0	0	1	0			0
1134	WBGene00001507	2.902	2.974	3.355	3.036	3.189	2.869	3.13	3.086	4	4	3.06675	3.0685	0.199816	0.139534	1.11908	1.12039	0.0636508	0.0462837	0.35009	0.341173	0.107758	0.105768	0.00715985	24	1.05296	0.0174812	24	1.03799	0.994347	0.986197	1.00057	0.494339	0	0	0	0	0	0	0			0
1135	WBGene00001508	3.01671	3.95486	3.73286	3.691	3.79314	4.73514	4.71214	5.03529	4	4	3.59886	4.56893	0.404999	0.537733	1.27555	1.5137	0.118187	0.124068	0.348745	0.383355	0.104704	0.0872546	3.74363	24	1.20834	3.49476	24	1.43996	0.00100443	0.00186641	1.26955	0.00527297	1	0	0	0	0	0	0		178985	0
1136	WBGene00001509	4.11291	3.82248	4.05622	4.07909	3.62561	3.68917	3.7223	3.74078	4	4	4.01767	3.69447	0.132198	0.0506278	1.39029	1.30677	0.0334163	0.0137546	0.297881	0.298235	0.065296	0.0821222	-1.53354	24	1.00238	-1.59217	24	1.58179	0.138222	0.124434	-1.08748	0.155988	0	0	0	0	0	0	0			0
1137	WBGene00001510	5.32014	5.20529	5.187	5.28143	5.45433	5.18981	5.12905	5.24052	4	4	5.24846	5.25343	0.0628933	0.141477	1.65788	1.65861	0.011975	0.0266883	0.164568	0.218324	0.0328925	0.0435075	0.0363151	24	1.76	0.0267866	24	1.74958	0.971331	0.978851	1.00095	0.488562	0	0	0	0	0	0	0			0
1138	WBGene00001511	5.2088	4.7476	5.3198	5.2728	4.879	4.4552	5.109	5.228	4	4	5.13725	4.9178	0.26372	0.340727	1.6355	1.59101	0.0526197	0.0707217	0.20642	0.316196	0.0421876	0.0654313	-1.16231	24	2.34643	-1.14281	24	2.40549	0.256537	0.264392	-1.04462	0.230983	0	0	0	0	0	0	0			0
1139	WBGene00001512	2.3245	2.797	2.2405	2.166	2.355	2.6815	2.128	1.966	4	4	2.382	2.28262	0.284142	0.310107	0.862908	0.818525	0.11413	0.134095	0.303828	0.322574	0.129758	0.135198	-0.448513	24	1.1272	-0.473696	24	1.08562	0.657807	0.639998	-1.04354	0.398174	0	0	0	0	0	0	0			0
1140	WBGene00001513	4.70212	4.22106	4.56959	4.733	4.00512	3.58029	4.06412	4.31306	4	4	4.55644	3.99065	0.234555	0.304383	1.51552	1.38172	0.0525528	0.0777524	0.2315	0.295061	0.0490698	0.0786018	-3.01727	24	1.62451	-2.88805	24	2.56589	0.00595609	0.008084	-1.14178	0.0184917	0	0	0	0	0	0	0			0
1141	WBGene00001514	4.9483	4.55565	4.9578	5.0856	4.33545	3.9934	4.59595	4.96225	4	4	4.88684	4.47176	0.229496	0.409639	1.5857	1.49463	0.0478729	0.0918357	0.209117	0.343761	0.0441059	0.0697534	-2.06315	24	2.70233	-2.20703	24	2.50114	0.0500766	0.0371217	-1.09282	0.0805706	0	0	0	0	0	0	0			0
1142	WBGene00001515	2.52567	2.94417	2.65775	2.39725	3.2145	3.50292	3.75667	2.67975	4	4	2.63121	3.28846	0.234181	0.462316	0.964533	1.18263	0.0876435	0.145929	0.336828	0.373325	0.122428	0.123162	2.61427	24	1.22845	2.51179	24	1.01202	0.0152053	0.0191445	1.24979	0.0355786	0	0	0	0	0	0	0			0
1143	WBGene00001516	2.64329	3.31742	2.84223	2.74797	3.04739	3.50419	3.00626	3.17261	4	4	2.88773	3.18261	0.297763	0.225759	1.05667	1.15587	0.0995329	0.0692747	0.350716	0.315972	0.12251	0.112326	1.24936	24	1.23201	1.19377	24	1.18955	0.22358	0.244233	1.10212	0.211533	0	0	0	0	0	0	0			0
1144	WBGene00001517	2.02567	2.38317	1.99967	1.98733	2.0565	2.00767	1.80417	1.9285	4	4	2.09896	1.94921	0.190145	0.110144	0.738526	0.666205	0.0869679	0.0572465	0.305653	0.247358	0.133905	0.131448	-0.761691	24	1.52688	-0.770842	24	1.03773	0.453665	0.448323	-1.07683	0.322507	0	0	1	0	0	0	0			0
1145	WBGene00001518	2.93092	3.68769	3.26415	3.06508	2.82638	3.38077	2.89854	2.70408	4	4	3.23696	2.95244	0.330203	0.296617	1.17085	1.07902	0.0997479	0.0970652	0.35967	0.340128	0.10943	0.125453	-1.14952	24	1.11822	-1.10325	24	1.31428	0.26167	0.280858	-1.09637	0.23366	0	0	1	0	0	0	0			0
1146	WBGene00001519	2.186	2.8628	2.5535	2.2111	3.9516	3.9114	3.8624	3.684	4	4	2.45335	3.85235	0.320333	0.118012	0.891207	1.34833	0.128308	0.0309915	0.29642	0.287959	0.131724	0.0759436	6.77054	24	1.05963	6.0128	24	3.0085	5.29e-07	3.3e-06	1.57024	2.27e-05	1	1	1	0	0	0	0		179962	0
1147	WBGene00001520	4.37	4.7175	4.889	4.73125	5.4565	5.44813	5.4115	5.23912	4	4	4.67694	5.38881	0.218919	0.101687	1.5418	1.68419	0.0475368	0.0190333	0.215193	0.24663	0.043927	0.0447191	4.3498	24	1.31351	4.5429	24	1.03639	0.000217017	0.000132794	1.15221	0.00182547	1	1	1	0	0	0	0		181646	0
1148	WBGene00001522	3.379	3.18333	3.26133	3.26433	3.198	2.73467	3.21333	2.99933	4	4	3.272	3.03633	0.0805881	0.223485	1.18518	1.10856	0.0245367	0.0752412	0.321676	0.324627	0.0998796	0.107899	-1.03134	24	1.01843	-1.04218	24	1.16702	0.312663	0.307711	-1.07762	0.259743	0	0	0	0	0	0	0			0
1149	WBGene00001523	2.7815	3.677	3.981	3.3695	3.0405	3.273	3.8775	3.3085	4	4	3.45225	3.37487	0.512134	0.355538	1.23035	1.21235	0.154105	0.102356	0.391366	0.361236	0.118773	0.0983252	-0.290558	24	1.17378	-0.233381	24	1.45916	0.773885	0.817444	-1.02293	0.435162	0	1	0	0	0	0	0			0
1150	WBGene00001526	4.98047	4.8502	4.57013	4.6686	4.2208	3.98467	3.94913	4.12733	4	4	4.76735	4.07048	0.18342	0.126382	1.56124	1.4034	0.0384328	0.0309671	0.192456	0.259138	0.043084	0.0625751	-4.3178	24	1.81301	-4.15503	24	2.10946	0.000235408	0.000355869	-1.1712	0.0019207	0	0	0	0	0	0	0			0
1151	WBGene00001527	4.53639	4.31356	4.42444	4.38894	4.17422	3.75389	3.896	3.97794	4	4	4.41583	3.95051	0.092721	0.175529	1.48503	1.37311	0.0209414	0.0442692	0.195721	0.294425	0.0442117	0.0652306	-2.63232	24	2.26294	-2.84062	24	2.17684	0.0145954	0.0090331	-1.11779	0.0345452	0	0	0	0	0	0	0			0
1152	WBGene00001528	1.72544	1.54774	1.52815	1.57826	1.81274	1.43774	1.43008	1.46292	4	4	1.5949	1.53587	0.0894342	0.185114	0.465665	0.42402	0.054839	0.114293	0.204546	0.224856	0.123793	0.141414	-0.388361	24	1.20845	-0.443159	24	1.30495	0.701172	0.66162	-1.03843	0.411972	0	0	0	0	0	0	0			0
1153	WBGene00001529	1.80126	1.65818	1.67726	1.60282	1.81836	1.54841	1.42969	1.66818	4	4	1.68488	1.61616	0.0837621	0.166284	0.520782	0.476089	0.0490791	0.102794	0.215883	0.209913	0.122537	0.135873	-0.456427	24	1.05769	-0.488541	24	1.2295	0.652187	0.629601	-1.04252	0.396173	0	0	0	0	0	0	0			0
1154	WBGene00001530	2.11046	1.88926	1.85677	1.86172	2.16787	1.79951	1.67487	1.82331	4	4	1.92955	1.86639	0.121451	0.211265	0.655857	0.619413	0.0611771	0.109448	0.232166	0.266651	0.124532	0.135319	-0.357283	24	1.31913	-0.396348	24	1.18074	0.724003	0.69535	-1.03384	0.419537	0	0	0	0	0	0	0			0
1155	WBGene00001531	1.9167	1.7053	1.66208	1.73508	1.89235	1.55573	1.54422	1.63559	4	4	1.75479	1.65697	0.112025	0.162095	0.560868	0.501572	0.0623774	0.094352	0.233069	0.229615	0.128571	0.138735	-0.597949	24	1.03032	-0.62697	24	1.16436	0.555475	0.536598	-1.05903	0.362996	0	0	0	0	0	0	0			0
1156	WBGene00001532	1.94574	1.95341	1.87862	1.96395	1.89444	1.92359	1.65295	1.81318	4	4	1.93543	1.82104	0.0386043	0.121408	0.660178	0.597689	0.0201275	0.0681884	0.222963	0.219804	0.120389	0.116583	-0.730719	24	1.02896	-0.745754	24	1.06637	0.472025	0.463058	-1.06282	0.330399	0	0	0	0	0	0	0			0
1157	WBGene00001533	1.87013	1.88982	1.72463	1.65237	1.82058	1.75763	1.59845	1.53376	4	4	1.78424	1.67761	0.114698	0.133918	0.577428	0.51497	0.0646933	0.0800204	0.21915	0.231525	0.134804	0.129588	-0.668966	24	1.11612	-0.668038	24	1.08213	0.509902	0.510483	-1.06356	0.345375	0	0	0	0	0	0	0			0
1158	WBGene00001534	1.53955	1.64655	1.42232	1.39681	1.376	1.40006	1.29239	1.43439	4	4	1.50131	1.37571	0.11506	0.060495	0.404163	0.318232	0.0758673	0.0445495	0.196622	0.19947	0.131374	0.143814	-0.896842	24	1.02917	-0.882309	24	1.19835	0.378711	0.386362	-1.0913	0.290384	0	0	0	0	0	0	0			0
1159	WBGene00001535	2.07772	2.34	2.04719	2.01474	1.88974	2.01798	1.81284	1.90123	4	4	2.11991	1.90545	0.148961	0.0846638	0.749595	0.643983	0.0682052	0.0441434	0.25623	0.206807	0.117097	0.115673	-1.30264	24	1.53508	-1.28328	24	1.02478	0.205058	0.211646	-1.11255	0.200613	0	0	0	0	0	0	0			0
1160	WBGene00001536	1.80377	1.86058	2.06704	1.77127	1.84877	1.82362	2.11881	1.77908	4	4	1.87566	1.89257	0.132814	0.153555	0.627145	0.635572	0.0690361	0.0784818	0.256465	0.252193	0.131976	0.121874	0.0939913	24	1.03416	0.0938288	24	1.17265	0.925896	0.926024	1.00901	0.476888	0	0	0	0	0	0	0			0
1161	WBGene00001537	2.34594	2.628	2.61176	2.26309	2.39003	2.62347	2.42026	2.22615	4	4	2.4622	2.41498	0.185311	0.163071	0.898917	0.879988	0.0756226	0.067298	0.272701	0.32018	0.113604	0.123529	-0.224554	24	1.37852	-0.225572	24	1.18235	0.824227	0.823444	-1.01955	0.44877	0	0	0	0	0	0	0			0
1162	WBGene00001538	3.68176	4.05978	4.00802	3.8418	3.98394	4.40949	4.44739	4.48937	4	4	3.89784	4.33255	0.171461	0.234683	1.35969	1.46501	0.0443256	0.0556476	0.282404	0.286207	0.0775359	0.0679441	2.16231	24	1.02712	2.04332	24	1.30227	0.0407809	0.0521486	1.11153	0.0702922	0	0	0	0	0	0	0			0
1163	WBGene00001539	1.81393	1.70817	1.66623	1.59283	1.7456	1.68727	1.5424	1.48533	4	4	1.69529	1.61515	0.0923466	0.121604	0.52675	0.477297	0.0542007	0.0754262	0.210623	0.203817	0.127487	0.131965	-0.546869	24	1.0679	-0.539033	24	1.07148	0.589518	0.59483	-1.04962	0.374845	0	0	0	0	0	0	0			0
1164	WBGene00001540	1.55636	1.62032	1.43818	1.3652	1.34498	1.4608	1.35518	1.33657	4	4	1.49502	1.37438	0.114812	0.0581104	0.399915	0.31735	0.077089	0.0414748	0.205678	0.201843	0.140171	0.145517	-0.837249	24	1.03836	-0.817282	24	1.07773	0.410712	0.421807	-1.08778	0.304408	0	0	0	0	0	0	0			0
1165	WBGene00001541	1.94019	2.09728	1.99444	1.82517	1.58353	1.77106	1.67569	1.64211	4	4	1.96427	1.6681	0.11333	0.0784971	0.673866	0.51086	0.0579247	0.0467564	0.271133	0.209129	0.138322	0.121632	-1.72991	24	1.68089	-1.76994	24	1.29327	0.0964883	0.0894417	-1.17755	0.124275	0	0	0	0	0	0	0			0
1166	WBGene00001542	1.88165	1.8503	1.72147	1.6597	1.912	1.72581	1.57186	1.69007	4	4	1.77828	1.72494	0.105139	0.140998	0.574327	0.54272	0.0593824	0.08089	0.210027	0.227095	0.130067	0.125066	-0.344898	24	1.16914	-0.35034	24	1.08158	0.733175	0.729139	-1.03092	0.422497	0	0	0	0	0	0	0			0
1167	WBGene00001543	2.03649	2.25184	1.87189	2.06059	1.74586	1.86916	1.67124	1.97127	4	4	2.0552	1.81439	0.155614	0.132663	0.718229	0.593747	0.075607	0.0729878	0.257343	0.226718	0.129127	0.129393	-1.40432	24	1.2884	-1.36195	24	1.00412	0.173034	0.185862	-1.13273	0.180034	0	0	0	0	0	0	0			0
1168	WBGene00001544	2.11271	2.47031	1.97091	1.84606	1.88549	1.98217	1.68989	1.61357	4	4	2.1	1.79278	0.269842	0.170457	0.735967	0.580372	0.125042	0.0951604	0.309626	0.262025	0.136646	0.143224	-1.51483	24	1.39633	-1.57204	24	1.0986	0.142875	0.129032	-1.17137	0.159123	0	0	0	0	0	0	0			0
1169	WBGene00001545	1.5248	1.55815	1.34407	1.29815	1.24287	1.21885	1.20023	1.26975	4	4	1.43129	1.23293	0.129319	0.0301246	0.355502	0.209166	0.0906731	0.0243923	0.223427	0.202522	0.157798	0.182211	-1.31564	24	1.21711	-1.2142	24	1.33334	0.200724	0.236485	-1.16089	0.19803	0	0	0	0	0	0	0			0
1170	WBGene00001546	1.95284	2.02389	1.92997	1.81354	1.63746	1.65432	1.61303	1.61505	4	4	1.93006	1.62997	0.087369	0.0196535	0.656773	0.488505	0.0457031	0.0120369	0.231444	0.191782	0.125516	0.12552	-1.99679	24	1.45639	-1.89588	24	1.00007	0.0573102	0.0700791	-1.18411	0.087987	0	0	0	0	0	0	0			0
1171	WBGene00001547	1.82828	2.50722	1.93369	1.77925	1.54472	1.96434	1.61884	1.71506	4	4	2.01211	1.71074	0.336303	0.182886	0.689543	0.53279	0.156961	0.104109	0.312247	0.224279	0.144798	0.134569	-1.5678	24	1.93829	-1.58596	24	1.1578	0.13002	0.125837	-1.17616	0.150024	0	0	0	0	0	0	0			0
1172	WBGene00001548	1.72474	1.90837	1.54684	1.53698	1.44479	1.55823	1.36447	1.46821	4	4	1.67923	1.45892	0.175444	0.07973	0.51434	0.376581	0.102621	0.0546112	0.226226	0.201789	0.135673	0.140486	-1.45348	24	1.25688	-1.41071	24	1.07221	0.159042	0.17116	-1.15101	0.170593	0	0	1	0	0	0	0			0
1173	WBGene00001549	1.97385	1.99593	1.78974	1.72619	1.8723	1.84389	1.62889	1.60711	4	4	1.87143	1.73805	0.133864	0.139386	0.62477	0.550345	0.071859	0.0803099	0.258643	0.225347	0.133762	0.135078	-0.777628	24	1.31734	-0.783007	24	1.01977	0.444387	0.441281	-1.07674	0.318477	0	0	0	0	0	0	0			0
1174	WBGene00001550	2.25767	2.13122	2.08933	1.92233	1.70667	2.174	1.94956	2.02267	4	4	2.10014	1.96322	0.138459	0.194909	0.740353	0.670782	0.0665552	0.101478	0.28516	0.270191	0.126894	0.137491	-0.697069	24	1.11387	-0.743681	24	1.174	0.492457	0.464288	-1.06974	0.338667	0	0	1	0	0	0	0			0
1175	WBGene00001551	1.83511	2.03833	1.69156	1.66078	1.91733	2.04911	1.98244	1.76433	4	4	1.80644	1.92831	0.172252	0.121836	0.588043	0.655111	0.0934101	0.0642387	0.249448	0.234474	0.136792	0.131538	0.711913	24	1.13181	0.706821	24	1.08147	0.483382	0.486484	1.06746	0.335292	0	0	0	0	0	0	0			0
1176	WBGene00001552	1.92167	2.38333	2.0865	1.92694	2.02444	2.11589	1.79967	1.72322	4	4	2.07961	1.91581	0.216447	0.184763	0.728279	0.646642	0.100971	0.096602	0.253362	0.23967	0.133831	0.132781	-0.939359	24	1.11752	-0.866063	24	1.01589	0.356905	0.395031	-1.0855	0.280232	0	0	0	0	0	0	0			0
1177	WBGene00001553	2.12945	2.12497	1.99371	2.00787	2.01042	2.03877	1.86558	1.93148	4	4	2.064	1.96156	0.0732397	0.0784557	0.724173	0.673138	0.0355051	0.040208	0.228705	0.242703	0.119388	0.112734	-0.614338	24	1.12615	-0.621611	24	1.12154	0.544772	0.540058	-1.05222	0.359006	0	0	0	0	0	0	0			0
1178	WBGene00001554	2.077	2.19125	2.13975	2.07131	2.15456	2.13925	1.83737	1.75006	4	4	2.11983	1.97031	0.0568213	0.207099	0.751067	0.674008	0.0266952	0.105862	0.24641	0.29307	0.116252	0.124575	-0.780976	24	1.41458	-0.904487	24	1.14831	0.442453	0.374727	-1.07588	0.317906	0	0	0	0	0	0	0			0
1179	WBGene00001555	2.37675	2.79637	2.332	2.25787	3.496	3.2775	3.07687	2.96037	4	4	2.44075	3.20269	0.242098	0.235353	0.888802	1.16198	0.0953956	0.0730106	0.285916	0.355001	0.121422	0.101376	3.34314	24	1.54164	3.45408	24	1.4346	0.00271049	0.00206365	1.31217	0.0106463	0	0	0	0	0	0	0			0
1180	WBGene00001556	1.9785	2.06833	1.844	1.79183	1.93258	1.78	1.61967	1.53308	4	4	1.92067	1.71633	0.125997	0.17677	0.651065	0.536243	0.0654129	0.102397	0.248598	0.222621	0.134487	0.131069	-1.22462	24	1.24699	-1.22286	24	1.05283	0.232602	0.233256	-1.11905	0.217007	0	0	0	0	0	0	0			0
1181	WBGene00001557	2.36033	2.6565	2.28858	2.29758	2.46025	2.60433	1.98292	1.98142	4	4	2.40075	2.25723	0.173461	0.323016	0.873901	0.806455	0.0700952	0.143079	0.30161	0.305871	0.119485	0.126055	-0.668215	24	1.02846	-0.776644	24	1.113	0.510372	0.444956	-1.06358	0.345473	0	0	0	0	0	0	0			0
1182	WBGene00001558	4.80111	4.61189	4.583	4.62444	5.16	4.83289	4.70556	4.79656	4	4	4.65511	4.87375	0.098868	0.198206	1.5378	1.58326	0.0210396	0.0400626	0.192244	0.286342	0.0374704	0.0546338	1.26787	24	2.21852	1.37231	24	2.12591	0.217006	0.182656	1.04697	0.207698	0	0	0	0	0	0	0			0
1183	WBGene00001559	3.40747	3.90506	3.60686	3.34796	3.6789	3.89124	3.65167	3.53814	4	4	3.56684	3.68999	0.251199	0.147368	1.26986	1.30503	0.0693262	0.0395922	0.3243	0.295237	0.0957686	0.084618	0.561624	24	1.20657	0.550482	24	1.28092	0.579579	0.587077	1.03453	0.371437	0	0	0	0	0	0	0			0
1184	WBGene00001560	3.91065	4.15923	4.29207	3.99995	5.26342	4.9918	4.97035	4.98575	4	4	4.09047	5.05283	0.169215	0.140686	1.40802	1.61966	0.0412823	0.0274724	0.323226	0.230758	0.0683243	0.0458896	4.84637	24	1.962	5.14289	24	2.21678	6.14e-05	2.9e-05	1.23527	0.000747526	1	1	0	0	0	0	0		181419	0
1185	WBGene00001561	4.66144	4.71144	4.44322	4.43111	4.63011	4.65933	4.38289	4.41378	4	4	4.56181	4.52153	0.145445	0.143308	1.51734	1.50847	0.031868	0.0317042	0.210746	0.271076	0.0446461	0.0597822	-0.23461	24	1.65449	-0.23761	24	1.79299	0.816501	0.814201	-1.00891	0.446642	0	0	0	0	0	0	0			0
1186	WBGene00001562	4.62467	4.73213	4.57	4.66773	5.0426	5.18013	5.05887	5.21133	4	4	4.64863	5.12323	0.0685436	0.0849392	1.53649	1.63368	0.0147365	0.0165748	0.169476	0.233277	0.0391854	0.0454758	3.29194	24	1.89466	3.2381	24	1.34683	0.0030717	0.00350175	1.10209	0.0115884	0	0	0	0	0	0	0			0
1187	WBGene00001563	4.56615	4.12887	4.40111	4.51957	3.73448	3.87957	4.03452	4.40654	4	4	4.40392	4.01378	0.19609	0.289088	1.48174	1.38783	0.0452321	0.0709139	0.21804	0.306707	0.0499749	0.0774141	-2.07353	24	1.97869	-2.03833	24	2.39958	0.0490222	0.0526817	-1.0972	0.0794523	0	0	0	0	0	0	0			0
1188	WBGene00001564	4.50247	5.23562	4.98417	3.98057	5.96908	5.7399	5.71202	5.49675	4	4	4.67571	5.72944	0.55434	0.193203	1.53695	1.74519	0.121227	0.0337132	0.335703	0.218978	0.0709731	0.0376929	5.258	24	2.35022	5.18257	24	3.54543	2.17e-05	2.62e-05	1.22536	0.000354749	1	1	1	1	0	0	0		178583	0
1189	WBGene00001565	3.87858	3.87257	3.5623	3.57278	3.62211	4.17037	3.99823	3.9845	4	4	3.72156	3.9438	0.177914	0.230534	1.31328	1.37083	0.0478349	0.0595726	0.296697	0.305514	0.0777447	0.0738919	1.04372	24	1.06032	1.07306	24	1.107	0.307013	0.293914	1.05972	0.257357	0	0	1	0	0	0	0			0
1190	WBGene00001566	4.23792	3.82558	4.35267	4.41417	3.43792	3.22492	3.80875	3.99433	4	4	4.20758	3.61648	0.264934	0.348782	1.43535	1.28199	0.0646721	0.0969624	0.282203	0.344185	0.0675758	0.0956296	-2.65613	24	1.48751	-2.61939	24	2.00264	0.0138258	0.0150302	-1.16345	0.0331231	0	0	0	0	0	0	0			0
1191	WBGene00001568	4.69707	4.33444	4.54204	4.71115	3.99359	3.74437	4.02552	4.37193	4	4	4.57118	4.03385	0.175436	0.258059	1.51921	1.3932	0.0387956	0.063557	0.209834	0.308202	0.0472111	0.0763232	-2.88223	24	2.15735	-2.80818	24	2.61351	0.00819502	0.00974228	-1.1332	0.023091	0	0	0	0	0	0	0			0
1192	WBGene00001569	4.0604	3.27587	3.82273	4.14287	3.17463	2.80787	3.4737	3.8745	4	4	3.82547	3.33268	0.390728	0.452351	1.33755	1.19681	0.106291	0.13655	0.335718	0.369405	0.0913113	0.114471	-1.97446	24	1.21076	-1.92231	24	1.5716	0.059944	0.0665142	-1.14787	0.0905994	0	0	0	0	0	0	0			0
1193	WBGene00001570	2.65015	3.92315	2.75215	2.81462	2.72308	3.94377	3.39046	3.25369	4	4	3.03502	3.32775	0.595957	0.501507	1.09718	1.19366	0.181518	0.152334	0.430493	0.389437	0.146518	0.11685	1.00854	24	1.22196	1.02966	24	1.57226	0.323256	0.313434	1.09645	0.264909	0	1	0	0	0	0	0			0
1194	WBGene00001571	4.89245	4.3688	4.80175	4.84905	3.53495	3.10725	3.94455	4.22375	4	4	4.72801	3.70262	0.242323	0.487403	1.55249	1.30237	0.0525572	0.134223	0.218502	0.419083	0.0454953	0.103414	-4.33913	24	3.67865	-4.4276	24	5.1668	0.000222987	0.000178061	-1.27694	0.00185376	0	0	0	0	0	0	0			0
1195	WBGene00001572	3.133	3.429	3.643	3.463	4.778	5.044	4.695	5.031	4	4	3.417	4.887	0.211339	0.177135	1.2273	1.58608	0.0627525	0.0363202	0.337088	0.282373	0.0928284	0.0569531	6.68592	24	1.42509	6.58881	24	2.6566	6.47e-07	8.16e-07	1.4302	2.62e-05	1	1	1	1	0	0	0		180951	0
1196	WBGene00001574	4.77564	4.72043	4.83393	4.89936	4.27043	4.48686	4.581	4.651	4	4	4.80734	4.49732	0.0768818	0.165539	1.57005	1.50297	0.0159842	0.0372071	0.176863	0.242329	0.0362843	0.0576488	-2.06674	24	1.87732	-1.96959	24	2.52432	0.0497093	0.0605323	-1.06893	0.0801848	0	0	1	0	0	0	0			0
1197	WBGene00001575	3.655	3.859	3.09	2.882	2.982	2.765	3.277	2.696	4	4	3.3715	2.93	0.460753	0.261466	1.20829	1.07208	0.13756	0.0877309	0.390746	0.349583	0.114802	0.118598	-1.68415	24	1.24936	-1.65038	24	1.06723	0.105116	0.111893	-1.15068	0.131378	0	0	0	0	0	0	0			0
1198	WBGene00001577	4.06727	3.46787	3.20133	3.11687	4.15733	3.4642	3.19387	3.02467	4	4	3.46333	3.46002	0.429511	0.498877	1.23673	1.23385	0.119744	0.13902	0.352137	0.395706	0.105747	0.119519	-0.0125225	24	1.26277	-0.0360864	24	1.27744	0.990112	0.971512	-1.00096	0.493409	0	0	0	0	0	1	0			0
1199	WBGene00001578	2.92664	3.65336	3.64691	3.23418	2.95836	3.198	3.441	3.33964	4	4	3.36527	3.23425	0.35209	0.209188	1.20929	1.1722	0.106798	0.0656614	0.36133	0.331196	0.108317	0.098914	-0.534619	24	1.19025	-0.505751	24	1.19915	0.597832	0.617645	-1.04051	0.377843	0	0	0	0	0	1	0			0
1200	WBGene00001579	3.77223	3.42442	3.44771	3.50623	3.46656	3.35188	3.35073	3.54321	4	4	3.53765	3.4281	0.16013	0.0940292	1.26271	1.23172	0.0444253	0.0273347	0.305625	0.320605	0.0888563	0.102188	-0.494664	24	1.10043	-0.457678	24	1.32258	0.625335	0.6513	-1.03196	0.386883	0	0	0	0	0	0	0			0
1201	WBGene00001580	4.5939	4.22436	4.46259	4.64895	3.45226	3.33531	3.78254	4.08651	4	4	4.48245	3.66415	0.188987	0.339334	1.49949	1.29542	0.0426925	0.091766	0.211937	0.332626	0.0478587	0.0944117	-4.14949	24	2.4632	-3.8559	24	3.89161	0.000360903	0.000757765	-1.22332	0.00260733	0	0	0	0	0	0	0			0
1202	WBGene00001581	5.03224	5.35358	5.62321	5.29038	5.0014	5.36441	5.7425	5.68211	4	4	5.32485	5.44761	0.242662	0.340577	1.67161	1.69368	0.0455904	0.0634734	0.202133	0.290314	0.0380442	0.0532932	0.694001	24	2.06282	0.674243	24	1.96231	0.494345	0.5066	1.02305	0.339319	0	0	1	1	0	0	0			0
1203	WBGene00001582	4.6965	4.463	4.36838	4.46375	3.73787	3.95325	3.719	3.96287	4	4	4.49791	3.84325	0.139765	0.132856	1.50325	1.34587	0.0307619	0.0345831	0.196333	0.282552	0.0419156	0.0723057	-3.80539	24	2.07115	-3.76624	24	2.97573	0.000860314	0.000949105	-1.17034	0.00475495	0	0	0	0	0	0	0			0
1204	WBGene00001583	3.29288	2.97641	2.97729	3.14441	2.65776	2.62882	2.59376	2.85571	4	4	3.09775	2.68401	0.152191	0.117414	1.12978	0.986613	0.0487223	0.0429762	0.337281	0.309612	0.119611	0.101133	-1.80733	24	1.18672	-1.82804	24	1.3988	0.083263	0.0800013	-1.15415	0.112817	0	0	0	0	0	0	0			0
1205	WBGene00001584	4.68555	4.36555	4.4519	4.60955	3.7348	3.3994	3.8169	4.16175	4	4	4.52814	3.77821	0.145663	0.31304	1.50992	1.32667	0.0321979	0.0831082	0.184586	0.335766	0.0497011	0.086916	-3.91443	24	3.30884	-3.66061	24	3.05821	0.000653911	0.00123612	-1.19849	0.00395537	0	0	0	0	0	0	0			0
1206	WBGene00001585	5.257	5.089	5.303	5.347	4.577	3.932	4.773	4.931	4	4	5.249	4.55325	0.112818	0.438749	1.65786	1.51218	0.0216597	0.10011	0.170532	0.336521	0.0341169	0.0794415	-3.68841	24	3.89416	-3.3701	24	5.42197	0.00115323	0.00253718	-1.1528	0.00583235	0	0	0	1	0	0	0			0
1207	WBGene00001586	2.5404	2.8862	2.6312	2.5522	2.5486	2.6166	2.3274	2.44	4	4	2.6525	2.48315	0.160931	0.126771	0.974165	0.908542	0.0592681	0.0513696	0.31703	0.275465	0.114649	0.107375	-0.806454	24	1.32455	-0.835528	24	1.14007	0.427901	0.411661	-1.0682	0.311716	0	0	0	0	0	0	0			0
1208	WBGene00001587	2.766	2.66	2.522	2.589	3.11	3.096	3.115	2.621	4	4	2.63425	2.9855	0.104353	0.243133	0.968013	1.09113	0.0394612	0.0850886	0.330463	0.350515	0.116411	0.110076	1.45828	24	1.12504	1.53691	24	1.1184	0.157728	0.137395	1.13334	0.169763	0	0	0	1	0	0	0			0
1209	WBGene00001588	1.9805	2.519	2.3855	2.5405	2.7495	2.7195	2.8145	3.4685	4	4	2.35637	2.938	0.259794	0.355882	0.852245	1.07259	0.116	0.114981	0.335907	0.367359	0.140686	0.124775	2.33687	24	1.19603	2.34356	24	1.2713	0.0281211	0.0277168	1.24683	0.0543208	0	0	1	0	0	0	0			0
1210	WBGene00001589	4.70645	4.38424	4.56772	4.58352	4.03355	3.891	4.15614	4.21979	4	4	4.56048	4.07512	0.132853	0.145054	1.51711	1.40442	0.029288	0.0358067	0.205872	0.257368	0.0441337	0.0627282	-2.94536	24	1.56284	-2.93844	24	2.02016	0.00706341	0.00717977	-1.1191	0.0208485	0	0	0	0	0	0	0			0
1211	WBGene00001590	4.057	3.849	4.253	4.15	3.183	2.679	3.292	3.656	4	4	4.07725	3.2025	0.171939	0.403363	1.40475	1.15778	0.042566	0.129156	0.336729	0.389945	0.0678998	0.120956	-3.39569	24	1.34106	-3.56085	24	3.17333	0.00238271	0.00158447	-1.27315	0.00968795	0	0	0	0	0	0	0			0
1212	WBGene00001591	3.4634	3.8384	3.3486	3.193	3.2436	3.4946	3.0734	3.343	4	4	3.46085	3.28865	0.275012	0.176759	1.2392	1.18939	0.0780512	0.0539323	0.310215	0.313187	0.0942302	0.090134	-0.781277	24	1.01926	-0.764026	24	1.09295	0.442279	0.452299	-1.05236	0.317804	0	0	0	0	0	0	0			0
1213	WBGene00001592	3.59	3.996	3.842	3.569	3.569	3.672	3.637	3.831	4	4	3.74925	3.67725	0.206025	0.111063	1.32043	1.30183	0.054669	0.0299627	0.299007	0.285679	0.0785731	0.0835841	-0.348211	24	1.09548	-0.324353	24	1.13162	0.730718	0.748481	-1.01958	0.42166	0	0	0	0	0	0	0			0
1214	WBGene00001593	1.845	2.72875	2.1415	2.01425	1.90875	2.61625	1.776	1.956	4	4	2.18237	2.06425	0.383964	0.375806	0.769519	0.713364	0.167762	0.170581	0.345234	0.319489	0.153352	0.15197	-0.502251	24	1.16766	-0.520202	24	1.01826	0.620068	0.607688	-1.05722	0.385021	0	0	0	0	0	0	0			0
1215	WBGene00001594	2.2966	2.7778	2.4588	2.3398	3.292	3.269	3.3236	3.238	4	4	2.46825	3.28065	0.217465	0.036186	0.900707	1.188	0.085624	0.0110301	0.284044	0.320274	0.11442	0.0868665	3.79551	24	1.27137	3.99961	24	1.73501	0.000881927	0.000527431	1.32914	0.00483984	1	1	1	0	0	0	0		182971	0
1216	WBGene00001595	5.2862	4.928	5.5524	5.6342	4.8206	4.5266	5.1916	5.607	4	4	5.3502	5.03645	0.318271	0.467667	1.67578	1.61348	0.0604033	0.0925662	0.236437	0.317189	0.0441276	0.0645856	-1.58614	24	1.79972	-1.59286	24	2.14215	0.125797	0.124278	-1.0623	0.146953	0	1	0	0	0	0	1			0
1217	WBGene00001596	4.09402	4.10792	4.16367	4.149	3.91803	4.27446	4.16618	4.16141	4	4	4.12865	4.13002	0.033015	0.150659	1.41793	1.41778	0.00799646	0.0369254	0.29489	0.289894	0.0645569	0.0685644	0.00662073	24	1.03476	-0.00322169	24	1.12801	0.994772	0.997456	1.00033	0.494384	0	1	0	0	0	0	1			0
1218	WBGene00001597	5.48524	5.12581	5.31814	5.43814	4.53048	4.06352	4.70571	5.05386	4	4	5.34183	4.58839	0.160279	0.412013	1.67523	1.52045	0.030246	0.09102	0.182265	0.324171	0.0352491	0.0706642	-4.05187	24	3.16334	-3.91997	24	4.01887	0.000462136	0.000644848	-1.16421	0.00309887	0	0	0	0	0	0	1			0
1219	WBGene00001598	4.95496	4.73212	4.62004	4.84858	4.65708	4.30167	4.36767	4.62058	4	4	4.78893	4.48675	0.144769	0.17829	1.56596	1.50054	0.0302533	0.0397872	0.207867	0.249497	0.0414268	0.0586988	-1.86103	24	1.44065	-1.82136	24	2.00769	0.0750342	0.0810418	-1.06735	0.105787	0	0	0	0	0	0	1			0
1220	WBGene00001599	4.92853	4.52636	4.32547	4.55019	4.34853	3.78606	3.882	4.16836	4	4	4.58264	4.04624	0.251657	0.258819	1.52116	1.39626	0.0542479	0.0637714	0.24086	0.303552	0.0506279	0.0744467	-2.76852	24	1.58831	-2.77469	24	2.16227	0.0106808	0.0105293	-1.13257	0.0279511	0	0	0	0	0	0	1			0
1221	WBGene00001600	4.15824	3.68171	4.07819	4.11629	3.19405	2.78533	3.42962	3.60719	4	4	4.00861	3.25405	0.220367	0.355353	1.38727	1.17526	0.0564873	0.11229	0.286407	0.330478	0.0759984	0.105105	-3.45087	24	1.33143	-3.26917	24	1.91266	0.00208007	0.00324699	-1.23188	0.00878779	0	0	1	0	0	0	1			0
1222	WBGene00001601	4.18156	3.81717	4.0561	4.35075	3.4564	3.15135	3.61721	4.01475	4	4	4.1014	3.55993	0.224679	0.359535	1.41019	1.26593	0.0551794	0.100641	0.300394	0.352961	0.0688996	0.0977671	-2.33651	24	1.38061	-2.41221	24	2.0135	0.0281428	0.0238628	-1.1521	0.0543467	0	0	0	0	0	0	1			0
1223	WBGene00001602	4.695	4.689	4.504	4.357	4.157	3.916	4.065	4.051	4	4	4.56125	4.04725	0.162486	0.0993324	1.51712	1.39781	0.0358504	0.0246475	0.212962	0.273065	0.0451391	0.0657023	-2.9686	24	1.64411	-2.99336	24	2.11863	0.00668557	0.00630444	-1.127	0.020045	0	0	0	0	0	0	0			0
1224	WBGene00001603	2.6455	3.351	3.584	2.7595	2.47	2.7055	3.105	2.4985	4	4	3.085	2.69475	0.454191	0.292943	1.11841	0.987052	0.147318	0.105399	0.376807	0.334275	0.12521	0.114652	-1.54951	24	1.27066	-1.54748	24	1.19267	0.134348	0.134833	-1.14482	0.153135	0	0	0	0	0	0	0			0
1225	WBGene00001604	3.999	4.49525	4.42925	4.208	4.9335	4.87375	4.86925	4.786	4	4	4.28287	4.86562	0.225625	0.0606254	1.45357	1.58214	0.053171	0.0124833	0.247711	0.266905	0.0591158	0.0510388	3.20068	24	1.16098	3.29234	24	1.34154	0.0038344	0.00306875	1.13607	0.0136341	0	1	0	0	0	0	0			0
1226	WBGene00001606	5.644	5.564	5.653	5.635	5.131	4.703	5.354	5.486	4	4	5.624	5.1685	0.0406694	0.343178	1.72702	1.64089	0.00725524	0.0676929	0.129842	0.282554	0.0234758	0.0562502	-2.92964	24	4.73557	-2.82638	24	5.74125	0.00733032	0.0093382	-1.08813	0.0214288	0	0	0	0	0	0	0			0
1227	WBGene00001607	5.812	5.7035	5.662	5.7645	5.763	4.979	5.4355	5.6535	4	4	5.7355	5.45775	0.0661299	0.346983	1.74663	1.69548	0.0115273	0.0649077	0.127446	0.294432	0.0225549	0.0544083	-1.73144	24	5.33723	-1.73679	24	5.81898	0.0962111	0.0952453	-1.05089	0.124093	0	0	0	0	0	0	0			0
1228	WBGene00001608	1.87	3.0475	2.371	2.077	1.8375	2.5805	1.727	1.7685	4	4	2.34138	1.97837	0.513673	0.403996	0.833624	0.668227	0.210834	0.188246	0.383057	0.329709	0.163746	0.15953	-1.43645	24	1.34979	-1.44699	24	1.05356	0.163782	0.160837	-1.18348	0.173798	0	0	0	0	0	0	0			0
1229	WBGene00001609	4.81084	4.52609	4.56018	4.65746	3.51707	3.2983	3.82118	4.07413	4	4	4.63864	3.67767	0.127581	0.340334	1.53414	1.29906	0.0273196	0.092649	0.179725	0.325921	0.041949	0.0952154	-5.16388	24	3.28858	-4.5187	24	5.15194	2.75e-05	0.000141226	-1.2613	0.000421051	0	0	0	0	0	0	1			0
1230	WBGene00001612	1.78269	2.29507	1.681	1.85431	1.65852	1.97872	1.55676	1.76962	4	4	1.90327	1.74091	0.270707	0.180813	0.636447	0.550437	0.135673	0.102389	0.249478	0.226536	0.137474	0.138788	-0.96362	24	1.2128	-0.880578	24	1.0192	0.344846	0.387279	-1.09326	0.274559	0	0	0	0	0	0	0			0
1231	WBGene00001613	2.26277	2.35218	2.23705	2.19559	2.23468	2.22055	2.16791	2.15327	4	4	2.2619	2.1941	0.0662475	0.0395772	0.815885	0.785651	0.0290913	0.0180405	0.269043	0.256264	0.112689	0.123749	-0.364925	24	1.10222	-0.36129	24	1.20592	0.718364	0.721044	-1.0309	0.417367	0	0	0	0	0	0	0			0
1232	WBGene00001614	2.32753	2.02474	1.98358	2.005	2.33158	2.058	1.79016	2.14679	4	4	2.08521	2.08163	0.162416	0.225266	0.732698	0.728639	0.0752077	0.110472	0.251901	0.281349	0.119621	0.132592	-0.0189541	24	1.24748	-0.0454566	24	1.22863	0.985034	0.964119	-1.00172	0.492277	0	0	0	0	0	0	0			0
1233	WBGene00001615	2.51768	2.96153	2.84958	2.69084	2.42279	2.59105	2.37432	2.47468	4	4	2.75491	2.46571	0.193247	0.0930706	1.01152	0.901951	0.0707569	0.0374418	0.322171	0.307776	0.120931	0.122597	-1.29814	24	1.09573	-1.27251	24	1.02775	0.206575	0.215381	-1.11729	0.201487	0	0	0	0	0	0	0			0
1234	WBGene00001616	2.3679	2.87153	2.57693	2.437	2.1289	2.57227	2.12513	2.26367	4	4	2.56334	2.27249	0.223104	0.209981	0.938554	0.817803	0.0851119	0.0896033	0.312185	0.28287	0.123257	0.122253	-1.3808	24	1.21801	-1.39111	24	1.0165	0.180065	0.176954	-1.12799	0.184464	0	0	1	0	0	0	0			0
1235	WBGene00001617	2.73905	3.239	3.03205	2.97864	2.79414	3.25377	3.42782	3.27373	4	4	2.99718	3.18736	0.205483	0.273444	1.09589	1.1563	0.0690206	0.0889444	0.350719	0.32924	0.120466	0.113816	0.790706	24	1.13473	0.728943	24	1.12028	0.43686	0.47309	1.06345	0.315767	0	0	1	0	0	0	0			0
1236	WBGene00001618	2.05345	1.99373	1.84427	1.74382	1.87436	1.88936	1.676	1.70691	4	4	1.90882	1.78666	0.140855	0.110824	0.644423	0.578901	0.0743161	0.062143	0.240827	0.235725	0.136415	0.141464	-0.724996	24	1.04375	-0.666814	24	1.0754	0.475464	0.511251	-1.06837	0.331856	0	0	0	0	0	0	0			0
1237	WBGene00001619	2.224	3.085	2.399	2.594	2.797	2.51	2.706	2.486	4	4	2.5755	2.62475	0.371769	0.151317	0.938528	0.963744	0.140214	0.0574785	0.34163	0.274116	0.135831	0.116205	0.224882	24	1.55326	0.28213	24	1.3663	0.823975	0.780262	1.01912	0.448729	0	1	1	0	0	0	0			0
1238	WBGene00001620	4.449	4.734	4.636	4.732	5.041	5.175	5.133	5.256	4	4	4.63775	5.15125	0.133886	0.0894888	1.53391	1.63913	0.029171	0.017388	0.180048	0.231004	0.0427818	0.0457204	3.50652	24	1.64611	3.36065	24	1.14209	0.00181286	0.00259666	1.11072	0.00801928	1	0	1	0	0	0	0		180641	0
1239	WBGene00001621	3.00514	3.608	3.32	2.81529	2.57729	2.95843	2.612	2.33671	4	4	3.18711	2.62111	0.349368	0.256039	1.15463	0.960064	0.109268	0.0967696	0.385379	0.298249	0.119098	0.125289	-2.32296	24	1.66963	-2.25105	24	1.10667	0.0289795	0.0338125	-1.21594	0.0555043	0	0	0	0	0	0	0			0
1240	WBGene00001622	3.0725	3.434	3.215	2.7925	4.0255	3.8125	3.5455	3.6935	4	4	3.1285	3.76925	0.268852	0.202762	1.13775	1.3258	0.0868491	0.0535687	0.360313	0.325595	0.102708	0.0801163	2.63884	24	1.22463	2.88734	24	1.64348	0.014381	0.00809743	1.20481	0.0341447	0	0	0	0	0	0	0			0
1241	WBGene00001623	2.62975	2.82125	2.9795	2.24525	2.18575	2.43425	2.3975	1.8335	4	4	2.66894	2.21275	0.316594	0.275532	0.97616	0.788063	0.122713	0.130228	0.349826	0.310999	0.120908	0.144734	-1.94919	24	1.26528	-1.99477	24	1.43296	0.0630533	0.0575442	-1.20616	0.0939647	0	0	0	0	0	0	0			0
1242	WBGene00001624	2.58522	3.03967	2.59356	2.11622	2.15611	2.60322	2.16544	2.04656	4	4	2.58367	2.24283	0.377068	0.246248	0.941055	0.80346	0.148322	0.105366	0.340972	0.290457	0.137698	0.122312	-1.52187	24	1.37808	-1.49417	24	1.26741	0.14111	0.148163	-1.15197	0.157893	0	0	0	0	0	0	0			0
1243	WBGene00001625	1.97125	2.37663	2.15037	1.802	1.71437	2.0335	2.021	1.89725	4	4	2.07506	1.91653	0.246274	0.148138	0.724722	0.648201	0.118481	0.0792308	0.261649	0.23593	0.132726	0.128822	-0.89995	24	1.2299	-0.82742	24	1.06154	0.377089	0.416151	-1.08272	0.289777	0	0	0	0	0	0	0			0
1244	WBGene00001626	1.94	1.9108	2.1534	1.8824	1.9444	1.8494	1.6806	1.751	4	4	1.97165	1.80635	0.123428	0.115163	0.677451	0.589788	0.0609853	0.0636248	0.262576	0.253931	0.131706	0.136735	-0.905068	24	1.06925	-0.923499	24	1.07783	0.374426	0.364939	-1.09151	0.288547	0	0	0	0	0	0	0			0
1245	WBGene00001627	2.62979	2.97443	3.02521	2.94979	3.56379	3.88721	3.66264	3.471	4	4	2.8948	3.64616	0.179448	0.178741	1.06142	1.29279	0.0638797	0.0485162	0.339072	0.31835	0.113287	0.0878173	3.23096	24	1.13442	3.22828	24	1.66419	0.00356299	0.00358621	1.25955	0.0129636	0	1	1	0	0	0	0			0
1246	WBGene00001628	4.3678	4.242	4.34413	4.37493	3.97967	3.80973	4.138	4.19867	4	4	4.33222	4.03152	0.0615682	0.174312	1.466	1.39343	0.0143013	0.0435784	0.215785	0.298978	0.0478925	0.0730788	-1.63107	24	1.91971	-1.66111	24	2.32835	0.11593	0.109701	-1.07459	0.140028	0	0	0	0	0	1	0			0
1247	WBGene00001629	4.6611	4.6636	4.6422	4.4753	5.1938	5.0651	4.8279	4.8155	4	4	4.61055	4.97558	0.0906714	0.185354	1.5282	1.60402	0.0198577	0.0371331	0.19476	0.26863	0.0425459	0.0540241	2.20025	24	1.90244	2.20523	24	1.61235	0.0376573	0.037263	1.07917	0.0664911	0	0	0	0	0	0	0			0
1248	WBGene00001630	4.4315	4.51078	4.43378	4.54178	3.7625	3.95556	4.08028	4.22767	4	4	4.47946	4.0065	0.0555318	0.197053	1.49944	1.387	0.0123875	0.0494257	0.18633	0.301701	0.0440662	0.0746862	-2.66755	24	2.62171	-2.59325	24	2.87256	0.0134705	0.0159457	-1.11805	0.0325873	0	0	0	0	0	1	0			0
1249	WBGene00001631	4.35671	4.76771	4.69086	4.28357	4.38143	4.67629	4.48571	4.42457	4	4	4.52471	4.492	0.240157	0.130094	1.5085	1.50199	0.0531149	0.0286823	0.215614	0.244727	0.0512017	0.0571094	-0.200602	24	1.28828	-0.169733	24	1.24407	0.8427	0.866643	-1.00728	0.453901	0	0	0	0	0	0	0			0
1250	WBGene00001632	4.41843	4.28579	4.29786	4.37093	3.972	3.88514	4.0585	4.19386	4	4	4.34325	4.02738	0.0626647	0.131633	1.46855	1.39272	0.0144062	0.0325772	0.203132	0.280876	0.0496882	0.0695105	-1.82253	24	1.91193	-1.77495	24	1.95702	0.080858	0.0885924	-1.07843	0.110902	0	0	0	0	0	0	0			0
1251	WBGene00001633	3.56	3.966	4.017	4.073	3.256	3.623	3.819	4.151	4	4	3.904	3.71225	0.233459	0.374178	1.36061	1.30778	0.0615332	0.101675	0.303906	0.389932	0.0811788	0.0985684	-0.775728	24	1.64627	-0.827346	24	1.47432	0.445487	0.416192	-1.05165	0.318947	0	0	0	0	0	0	0			0
1252	WBGene00001635	4.16307	4.06333	4.08567	4.1448	3.41307	3.31487	3.62667	3.806	4	4	4.11422	3.54015	0.0473493	0.219897	1.4144	1.26273	0.0115113	0.0618536	0.26029	0.325184	0.0576067	0.0925632	-2.75644	24	1.56078	-2.78227	24	2.58185	0.0109834	0.0103462	-1.16216	0.0284785	0	0	0	0	0	0	0			0
1253	WBGene00001636	2.4095	2.80443	2.2665	2.65729	2.58371	3.03486	3.07557	3.27921	4	4	2.53443	2.99334	0.24179	0.293259	0.92654	1.09262	0.0957092	0.101397	0.287685	0.364652	0.117589	0.112267	1.97606	24	1.60666	2.04312	24	1.09705	0.0597522	0.0521698	1.18107	0.090425	0	0	1	0	0	0	0			0
1254	WBGene00001637	1.627	2.013	1.889	1.762	1.7	1.979	2.416	2.206	4	4	1.82275	2.07525	0.165924	0.307291	0.597215	0.721629	0.0915564	0.151215	0.245396	0.30984	0.130115	0.142646	1.27768	24	1.59419	1.28876	24	1.20189	0.213583	0.209767	1.13853	0.205732	0	0	1	0	0	0	0			0
1255	WBGene00001638	3.861	3.971	3.818	4.165	2.54	2.369	2.726	2.826	4	4	3.95375	2.61525	0.154871	0.20247	1.3741	0.959082	0.038778	0.0781838	0.281387	0.307002	0.0799627	0.115634	-6.42818	24	1.19035	-5.90394	24	2.09121	1.2e-06	4.32e-06	-1.51181	4.14e-05	0	0	1	0	0	0	0	expressed in multiple tissues, including muscle		0
1256	WBGene00001639	2.561	2.736	2.82	3.016	1.672	1.485	2.14	2.591	4	4	2.78325	1.972	0.188989	0.49617	1.02189	0.655571	0.0678949	0.249458	0.314476	0.365897	0.120647	0.178368	-3.36292	24	1.35377	-3.40226	24	2.18575	0.00258229	0.00234451	-1.41138	0.0103252	0	0	0	0	0	1	0			0
1257	WBGene00001640	2.445	2.099	2.47	2.382	2.769	2.657	2.145	2.281	4	4	2.349	2.463	0.17073	0.297501	0.851916	0.895859	0.0752052	0.121578	0.334066	0.330419	0.133586	0.139478	0.485242	24	1.02219	0.455062	24	1.09017	0.631905	0.653155	1.04853	0.389509	0	0	0	1	0	0	0			0
1258	WBGene00001641	1.878	1.775	1.222	1.287	1.902	1.55	0.743	1.876	4	4	1.5405	1.51775	0.333967	0.540761	0.414203	0.353311	0.219097	0.443526	0.268097	0.333658	0.166437	0.269865	-0.106303	24	1.54888	-0.3841	24	2.62903	0.916226	0.704286	-1.01499	0.473951	0	1	0	0	0	0	0			0
1259	WBGene00001642	1.943	1.735	1.548	1.628	1.952	1.094	1.515	1.806	4	4	1.7135	1.59175	0.171107	0.378298	0.534889	0.441306	0.0980456	0.257176	0.219009	0.270806	0.143808	0.192814	-0.699146	24	1.52895	-0.778117	24	1.79767	0.491182	0.444104	-1.07649	0.338299	0	0	0	0	0	0	0			0
1260	WBGene00001643	2.405	2.855	2.832	2.8335	2.0615	2.7655	2.4035	2.251	4	4	2.73137	2.37038	0.217837	0.298259	1.00228	0.857239	0.083235	0.123813	0.319775	0.315902	0.127731	0.136345	-1.60623	24	1.02467	-1.55265	24	1.13942	0.121302	0.133594	-1.1523	0.143705	0	1	0	0	0	0	0			0
1261	WBGene00001644	2.731	3.08	3.459	3.161	2.036	2.559	2.785	2.631	4	4	3.10775	2.50275	0.299401	0.325132	1.13037	0.910554	0.0974442	0.137629	0.37275	0.328845	0.133126	0.131049	-2.43425	24	1.28485	-2.35338	24	1.03195	0.0227342	0.0271322	-1.24173	0.0467757	0	0	0	0	0	1	0			0
1262	WBGene00001645	5.11667	5.03017	4.85183	4.97283	4.42067	4.3635	4.524	4.796	4	4	4.99287	4.52604	0.11107	0.191838	1.60783	1.50919	0.0223036	0.0418227	0.182641	0.276764	0.0337453	0.0629826	-2.81567	24	2.29628	-2.76096	24	3.48349	0.00957392	0.0108691	-1.10314	0.0258782	0	0	0	0	0	0	0			0
1263	WBGene00001646	3.464	3.586	3.468	3.506	2.663	2.765	3.179	3.241	4	4	3.506	2.962	0.0565921	0.290482	1.25438	1.08224	0.0160519	0.0985044	0.290093	0.351445	0.0783688	0.122643	-2.38751	24	1.46772	-2.36552	24	2.44905	0.0251889	0.0264256	-1.18366	0.0501385	0	0	0	0	0	0	0			0
1264	WBGene00001647	5.684	5.513	5.828	5.976	4.711	3.753	4.872	5.361	4	4	5.75025	4.67425	0.198061	0.673494	1.7488	1.53378	0.0345063	0.151086	0.158748	0.408531	0.0277477	0.0906435	-4.90999	24	6.62265	-4.5365	24	10.6713	5.22e-05	0.000134975	-1.2302	0.000665859	0	0	0	0	0	0	0			0
1265	WBGene00001648	5.719	5.503	5.246	5.424	5.332	5.131	5.054	4.971	4	4	5.473	5.122	0.196083	0.154495	1.69935	1.63321	0.035765	0.0299513	0.184491	0.241775	0.0335825	0.0469725	-2.30826	24	1.7174	-2.29085	24	1.95642	0.029913	0.0310541	-1.06853	0.0567028	0	0	0	0	0	0	0			0
1266	WBGene00001649	4.05833	3.79533	3.917	3.657	4.821	4.408	4.68167	4.45267	4	4	3.85692	4.59083	0.171209	0.194718	1.34913	1.52339	0.0444221	0.0422717	0.292718	0.26874	0.0735193	0.0546853	3.69385	24	1.18641	3.8037	24	1.80743	0.00113766	0.000863979	1.19029	0.00577391	1	0	0	0	0	1	0		181637	0
1267	WBGene00001650	3.36574	4.06616	3.93936	3.72449	4.34885	5.13101	4.97435	4.84903	4	4	3.77394	4.82581	0.306499	0.338249	1.32557	1.57207	0.0829738	0.0719212	0.333722	0.297851	0.0843551	0.0622157	4.70312	24	1.25537	4.70341	24	1.83833	8.83e-05	8.83e-05	1.27872	0.00097516	1	0	0	0	0	0	0		177850	0
1268	WBGene00001651	4.0733	4.26918	4.26405	4.10188	4.02284	4.10941	4.16443	4.11067	4	4	4.17711	4.10184	0.104038	0.0585775	1.42939	1.41136	0.0249207	0.0143242	0.29072	0.275778	0.0634906	0.0665733	-0.375662	24	1.1113	-0.391915	24	1.09947	0.710468	0.698579	-1.01835	0.414806	0	0	0	0	0	1	0			0
1269	WBGene00001653	4.68833	4.2219	4.56171	4.59265	3.54729	3.36206	3.91031	4.16437	4	4	4.51615	3.746	0.203433	0.360058	1.50688	1.31723	0.0458972	0.0960357	0.212958	0.367346	0.047923	0.0928602	-3.62753	24	2.97552	-3.62977	24	3.75466	0.00134237	0.0013349	-1.20559	0.00649812	0	0	0	0	0	0	0			0
1270	WBGene00001660	3.92	3.6638	4.1133	4.1013	3.23865	3.16075	3.59	3.6105	4	4	3.9496	3.39997	0.210054	0.233584	1.37253	1.22199	0.0540485	0.0688971	0.288219	0.335135	0.0835312	0.0970878	-2.48685	24	1.35206	-2.35078	24	1.35093	0.0202372	0.0272859	-1.16166	0.0431832	0	0	0	0	0	0	0			0
1271	WBGene00001661	5.086	4.79	5.222	4.986	4.42	4.095	4.773	5.021	4	4	5.021	4.57725	0.181853	0.405185	1.61313	1.51813	0.0363884	0.0892508	0.180775	0.327946	0.0365981	0.0701373	-2.37001	24	3.291	-2.40183	24	3.67266	0.0261686	0.0244118	-1.09695	0.0514128	0	0	0	0	0	0	0			0
1272	WBGene00001662	5.287	4.987	5.118	5.015	4.47	4.182	4.345	4.556	4	4	5.10175	4.38825	0.135738	0.162514	1.62932	1.47841	0.0264175	0.0372497	0.175907	0.290211	0.0350093	0.0624262	-4.20496	24	2.72185	-4.21691	24	3.17956	0.00031353	0.000304166	-1.16259	0.00236243	0	0	0	1	0	0	0			0
1273	WBGene00001663	2.5	2.832	2.938	2.685	4.386	3.894	3.814	3.946	4	4	2.73875	4.01	0.189988	0.256479	1.00567	1.38731	0.0701232	0.0623322	0.33957	0.303024	0.118936	0.0761733	5.58648	24	1.25575	5.40418	24	2.43793	9.5e-06	1.5e-05	1.46417	0.000199006	1	0	0	0	0	0	0		179546	0
1274	WBGene00001664	1.672	1.983	2.012	1.753	1.583	1.094	1.437	1.541	4	4	1.855	1.41375	0.168252	0.221825	0.614772	0.336038	0.0912883	0.169122	0.242194	0.249193	0.129412	0.165204	-2.53958	24	1.05864	-2.65643	24	1.62965	0.0179916	0.0138165	-1.31211	0.0399163	0	0	0	0	0	0	0			0
1275	WBGene00001665	2.073	2.595	2.395	2.002	1.65	1.935	2.027	1.921	4	4	2.26625	1.88325	0.277985	0.162453	0.812528	0.630071	0.121919	0.089421	0.300946	0.241643	0.132903	0.123023	-1.9847	24	1.55107	-2.01497	24	1.16707	0.0587235	0.0552414	-1.20337	0.0894063	0	0	0	0	0	0	0			0
1276	WBGene00001666	2.807	2.443	3.132	2.565	2.764	2.098	2.234	2.386	4	4	2.73675	2.3705	0.303834	0.287501	1.00224	0.857769	0.109318	0.118244	0.357162	0.311729	0.131866	0.138091	-1.54514	24	1.31273	-1.5133	24	1.09664	0.135398	0.143262	-1.1545	0.153992	0	0	0	0	0	0	0			0
1277	WBGene00001667	1.521	1.366	1.439	1.114	2.002	0.91	1.156	1.496	4	4	1.36	1.391	0.175797	0.47291	0.30079	0.286899	0.13584	0.338993	0.215261	0.316627	0.162645	0.233942	0.161935	24	2.16354	-0.0975058	24	2.06889	0.872713	0.923134	1.02279	0.46199	0	0	0	0	0	0	0			0
1278	WBGene00001668	1.913	1.74	1.387	1.748	1.219	1.414	0.841	0.926	4	4	1.697	1.1	0.221514	0.264647	0.522043	0.0736022	0.137067	0.240452	0.242849	0.242176	0.136743	0.236416	-3.4814	24	1.00556	-3.28391	24	2.98911	0.00192904	0.00313246	-1.54273	0.00836399	0	1	0	0	0	0	0			0
1279	WBGene00001669	3.294	3.5	3.17	3.016	3.122	2.999	3.243	3.191	4	4	3.245	3.13875	0.204525	0.105528	1.17563	1.1434	0.0628253	0.0338747	0.340692	0.295455	0.105197	0.0946835	-0.471217	24	1.32966	-0.455524	24	1.23441	0.641741	0.652827	-1.03385	0.392709	0	0	0	0	0	0	0			0
1280	WBGene00001670	2.621	3.06	2.938	2.132	3.357	2.896	2.967	3.241	4	4	2.68775	3.11525	0.414129	0.219321	0.97919	1.13445	0.161946	0.0703356	0.382344	0.312786	0.138297	0.106492	1.73082	24	1.49422	1.77904	24	1.68653	0.0963233	0.0879038	1.15905	0.12413	0	0	0	0	0	0	0			0
1281	WBGene00001671	2.47	2.438	2.305	2.291	3.631	2.934	2.967	2.491	4	4	2.376	3.00575	0.0911885	0.469948	0.864866	1.09153	0.0383635	0.154302	0.272821	0.396333	0.115271	0.124847	2.61765	24	2.1104	2.6678	24	1.17306	0.0150893	0.0134627	1.26505	0.0354143	0	0	1	0	0	0	0			0
1282	WBGene00001672	2.837	2.534	2.39	2.353	2.142	2.586	1.953	1.956	4	4	2.5285	2.15925	0.219989	0.297917	0.924883	0.76303	0.0848047	0.131987	0.297368	0.313	0.121032	0.139517	-1.71053	24	1.1079	-1.75261	24	1.32879	0.100066	0.0924375	-1.17101	0.127221	0	0	0	0	0	0	0			0
1283	WBGene00001673	1.978	2.089	1.922	1.902	1.65	1.458	2.362	1.886	4	4	1.97275	1.839	0.0839102	0.390137	0.678761	0.592952	0.042019	0.206461	0.259654	0.305469	0.124519	0.161433	-0.667226	24	1.38403	-0.841775	24	1.68081	0.510993	0.408224	-1.07273	0.345715	0	0	0	0	0	0	0			0
1284	WBGene00001674	2.149	2.65	2.584	2.425	1.941	2.749	2.234	2.371	4	4	2.452	2.32375	0.222984	0.335471	0.893683	0.835387	0.0935572	0.144162	0.277992	0.331494	0.125222	0.13079	-0.592886	24	1.42196	-0.643909	24	1.09091	0.558803	0.525741	-1.05519	0.364073	0	0	0	0	0	0	0			0
1285	WBGene00001675	2.159	2.043	2.295	1.902	2.204	1.783	1.629	1.576	4	4	2.09975	1.798	0.167291	0.28455	0.739426	0.577857	0.0799825	0.150911	0.296688	0.281143	0.131126	0.156419	-1.47651	24	1.11364	-1.58315	24	1.42298	0.15281	0.126477	-1.16783	0.166357	0	0	0	0	0	0	0			0
1286	WBGene00001676	2.611	2.959	2.811	2.791	2.881	2.548	2.647	2.641	4	4	2.793	2.67925	0.142604	0.14193	1.02613	0.984508	0.051354	0.0520989	0.311208	0.313213	0.104046	0.104897	-0.515249	24	1.01292	-0.563447	24	1.01642	0.611093	0.578357	-1.04246	0.382233	0	0	0	0	0	0	0			0
1287	WBGene00001677	2.244	2.139	2.309	2.618	1.835	2.109	1.673	1.876	4	4	2.3275	1.87325	0.205943	0.179953	0.841956	0.624255	0.0862798	0.095244	0.296357	0.253729	0.11812	0.136384	-2.32868	24	1.36424	-2.41321	24	1.33315	0.0286241	0.0238104	-1.24249	0.0550226	0	0	0	0	0	0	0			0
1288	WBGene00001678	5.046	4.522	4.858	4.943	3.62	3.834	3.981	4.441	4	4	4.84225	3.969	0.226916	0.347829	1.57654	1.3757	0.0476535	0.0861633	0.218498	0.302968	0.0456291	0.0786944	-4.67556	24	1.92265	-4.41568	24	2.97442	9.48e-05	0.000183543	-1.22002	0.0010238	0	0	0	0	0	0	0			0
1289	WBGene00001679	5.624	6.014	5.709	5.674	6.295	5.934	5.964	5.831	4	4	5.75525	6.006	0.175991	0.20091	1.74977	1.79235	0.0301828	0.0330511	0.149351	0.198268	0.0259759	0.0324917	2.02034	24	1.76233	2.04709	24	1.5646	0.0546432	0.0517489	1.04357	0.0853697	0	0	0	1	0	0	0			0
1290	WBGene00001680	4.348	5.159	4.764	4.785	4.985	5.066	4.921	4.691	4	4	4.764	4.91575	0.331422	0.161153	1.55926	1.59204	0.0699992	0.0331296	0.234485	0.279487	0.051127	0.0580333	0.831909	24	1.42066	0.847596	24	1.28841	0.413662	0.405037	1.03185	0.305623	0	0	1	0	0	0	0			0
1291	WBGene00001681	1.968	2.984	2.484	2.425	2.971	3.2	2.578	2.216	4	4	2.46525	2.74125	0.415664	0.434271	0.891496	0.998692	0.170373	0.162336	0.33423	0.35429	0.146632	0.143759	1.13332	24	1.12364	1.04404	24	1.04036	0.268274	0.306869	1.11196	0.237266	0	0	1	0	0	0	0			0
1292	WBGene00001682	4.459	4.729	4.82	4.761	4.448	4.431	4.685	4.816	4	4	4.69225	4.595	0.160003	0.18748	1.54547	1.52435	0.034607	0.0406586	0.195107	0.265994	0.0395926	0.0556886	-0.589612	24	1.85864	-0.618192	24	1.97835	0.560961	0.542271	-1.02116	0.364898	0	0	1	1	0	0	0			0
1293	WBGene00001683	5.684	5.21	5.222	5.616	5.746	4.827	5	5.571	4	4	5.433	5.286	0.252151	0.441702	1.69168	1.66244	0.0464049	0.0837415	0.2027	0.320668	0.0367868	0.0608655	-0.774986	24	2.50267	-0.822523	24	2.73752	0.445917	0.418877	-1.02781	0.319028	0	0	0	0	0	0	0			0
1294	WBGene00001684	5.111	5.407	5.449	5.159	6.367	6.271	6.176	5.766	4	4	5.2815	6.145	0.171156	0.264425	1.66382	1.81493	0.0324204	0.0437699	0.182803	0.207915	0.034813	0.0337665	6.23805	24	1.29361	6.23161	24	1.06294	1.9e-06	1.93e-06	1.1635	5.91e-05	1	1	1	1	0	0	0		3565504	0
1295	WBGene00001685	5.377	5.235	5.572	5.323	6.435	6.26	6.048	6.046	4	4	5.37675	6.19725	0.142717	0.18763	1.68182	1.82376	0.0263744	0.0301279	0.180982	0.185018	0.0336171	0.0294956	6.3404	24	1.04509	6.34768	24	1.29899	1.48e-06	1.46e-06	1.1526	4.88e-05	1	1	1	0	0	0	0		180601	0
1296	WBGene00001686	5.1285	4.6155	4.908	5.1665	4.8115	4.342	4.739	5.016	4	4	4.95463	4.72713	0.253182	0.282271	1.59932	1.55195	0.0518187	0.0606963	0.197194	0.265924	0.042109	0.0591544	-1.37437	24	1.81856	-1.30484	24	1.97344	0.182026	0.204321	-1.04813	0.186099	0	0	0	0	0	0	0			0
1297	WBGene00001687	2.01567	2.36217	2.20783	2.09933	1.95767	1.95867	1.9165	2.04433	4	4	2.17125	1.96929	0.149628	0.0537471	0.77354	0.677397	0.0683914	0.0270863	0.252646	0.267388	0.119096	0.120643	-1.098	24	1.12011	-1.13426	24	1.02616	0.283101	0.267886	-1.10255	0.245174	0	0	0	0	0	0	0			0
1298	WBGene00001688	3.50091	3.20091	3.25509	3.67336	2.60273	2.16055	2.57036	3.04827	4	4	3.40757	2.59548	0.220089	0.362801	1.22445	0.946386	0.0642182	0.140691	0.303518	0.318782	0.0944584	0.132327	-3.68993	24	1.10311	-3.42056	24	1.96254	0.00114884	0.00224135	-1.31289	0.00581598	0	0	0	0	0	0	0			0
1299	WBGene00001689	3.65742	3.38475	3.43183	3.81317	2.76308	2.37308	2.769	3.21183	4	4	3.57179	2.77925	0.200139	0.342766	1.2719	1.01647	0.0557459	0.123565	0.328205	0.364162	0.100881	0.116674	-3.2333	24	1.23112	-3.31213	24	1.33762	0.00354281	0.00292398	-1.28516	0.0129169	0	0	0	0	0	0	0			0
1300	WBGene00001690	1.85753	2.59205	2.22655	1.99897	1.90771	2.37974	2.095	1.99811	4	4	2.16878	2.09514	0.320526	0.204565	0.766196	0.736162	0.144764	0.0952308	0.271033	0.27039	0.142936	0.132747	-0.38469	24	1.00476	-0.307934	24	1.1594	0.703855	0.760789	-1.03515	0.412982	0	0	0	0	0	0	0			0
1301	WBGene00001691	1.66472	2.52216	2.16463	1.58984	1.45738	2.46591	1.96706	1.46006	4	4	1.98534	1.8376	0.439519	0.482575	0.667663	0.583554	0.218946	0.255135	0.337985	0.338593	0.168524	0.186945	-0.617602	24	1.0036	-0.668349	24	1.23056	0.542654	0.510288	-1.0804	0.358193	0	0	0	0	0	0	0			0
1302	WBGene00001692	3.836	3.763	4.314	4.405	3.625	3.216	3.922	4.621	4	4	4.0795	3.846	0.326805	0.592211	1.40356	1.3383	0.0802145	0.15197	0.358805	0.400913	0.0771418	0.105225	-0.867988	24	1.24848	-1.00039	24	1.86062	0.393997	0.327102	-1.06071	0.296696	0	0	0	0	0	0	0			0
1303	WBGene00001693	1.697	2.827	2.47	2.382	1.622	2.136	1.998	2.151	4	4	2.344	1.97675	0.472306	0.246321	0.835059	0.675169	0.217026	0.131933	0.390757	0.283934	0.166016	0.136075	-1.52064	24	1.894	-1.48973	24	1.48849	0.141417	0.149321	-1.18578	0.15813	0	0	0	0	0	0	0			0
1304	WBGene00001694	4.579	4.851	5.057	5.26	4.336	4.92	4.901	5.171	4	4	4.93675	4.832	0.291141	0.352818	1.59539	1.57319	0.0593322	0.0749176	0.222103	0.299055	0.0443047	0.0659326	-0.562401	24	1.81297	-0.558967	24	2.21463	0.579058	0.581363	-1.02168	0.371244	0	0	0	0	0	0	0			0
1305	WBGene00001695	1.67762	3.133	2.59075	1.89025	1.74375	3.361	2.55025	1.87225	4	4	2.32291	2.38181	0.666226	0.742509	0.812007	0.832902	0.286361	0.301969	0.430705	0.459606	0.184484	0.185943	0.187041	24	1.13871	0.159548	24	1.01588	0.853201	0.874572	1.02536	0.45636	0	0	0	0	0	0	0			0
1306	WBGene00001696	1.73025	2.326	1.52331	1.61119	2.13469	1.984	1.57744	1.676	4	4	1.79769	1.84303	0.362273	0.260368	0.572569	0.603912	0.188408	0.141456	0.296468	0.27546	0.159807	0.150155	0.224093	24	1.15835	0.285869	24	1.13269	0.824581	0.777432	1.02522	0.448815	0	0	0	0	0	0	0			0
1307	WBGene00001697	2.254	2.023	1.723	1.474	3.234	2.44	1.904	2.046	4	4	1.8685	2.406	0.341214	0.596753	0.612334	0.85639	0.18588	0.235821	0.305551	0.404883	0.161902	0.169361	2.11931	24	1.75586	2.0833	24	1.09426	0.0446026	0.0480473	1.28766	0.0744546	0	0	0	0	0	0	0			0
1308	WBGene00001698	1.68191	2.62718	1.61918	1.41591	1.61082	2.29818	1.96491	1.65691	4	4	1.83605	1.8827	0.539506	0.318478	0.578883	0.622315	0.268378	0.165132	0.356075	0.279926	0.190922	0.148	0.206031	24	1.61806	0.35958	24	1.66413	0.838505	0.722306	1.02541	0.45272	0	0	0	0	0	0	0			0
1309	WBGene00001699	2.751	4.406	4.073	3.814	2.797	3.824	3.361	3.401	4	4	3.761	3.34575	0.715607	0.421559	1.3095	1.20154	0.206939	0.129203	0.466607	0.370611	0.129419	0.113335	-1.39373	24	1.58514	-1.25513	24	1.30396	0.176171	0.221516	-1.12411	0.18185	0	0	0	0	0	0	0			0
1310	WBGene00001700	1.978	1.7865	1.51093	1.51243	1.6448	1.7755	1.48893	1.52517	4	4	1.69697	1.6086	0.227784	0.129676	0.522198	0.472966	0.132522	0.0796453	0.243544	0.213721	0.137036	0.131792	-0.545436	24	1.29855	-0.517886	24	1.08118	0.590487	0.609279	-1.05493	0.3752	0	1	0	0	0	0	0			0
1311	WBGene00001701	1.416	2.043	1.922	1.623	1.913	1.772	1.953	1.431	4	4	1.751	1.76725	0.284672	0.237229	0.549974	0.56213	0.166241	0.142133	0.272285	0.262262	0.149314	0.147374	0.0859679	24	1.0779	0.115884	24	1.0265	0.932205	0.908709	1.00928	0.478647	0	0	0	0	0	0	0			0
1312	WBGene00001702	2.681	3.611	3.392	3.386	2.612	3.411	2.962	3.356	4	4	3.2675	3.08525	0.40477	0.37353	1.17781	1.12093	0.131204	0.124379	0.364321	0.356052	0.117999	0.119395	-0.715527	24	1.04699	-0.677647	24	1.0238	0.481187	0.504476	-1.05907	0.33423	0	0	0	0	0	0	0			0
1313	WBGene00001703	3.264	4.173	4.244	3.209	3.099	4.035	4.025	3.291	4	4	3.7225	3.6125	0.562381	0.488435	1.30576	1.27745	0.151935	0.136536	0.398388	0.380465	0.110977	0.108466	-0.399363	24	1.09644	-0.364907	24	1.04684	0.693158	0.718377	-1.03045	0.409525	0	0	0	0	0	0	0			0
1314	WBGene00001704	2.525	2.413	2.395	2.565	2.915	2.125	2.273	2.131	4	4	2.4745	2.361	0.0833527	0.375613	0.905613	0.850333	0.0336524	0.149625	0.280697	0.334095	0.114244	0.131405	-0.520213	24	1.41666	-0.634952	24	1.32298	0.607681	0.531467	-1.04807	0.381313	0	0	0	1	0	0	0			0
1315	WBGene00001705	2.716	2.15	1.941	2.248	2.719	1.821	1.771	2.056	4	4	2.26375	2.09175	0.327559	0.436236	0.809468	0.722989	0.140609	0.195874	0.309068	0.335772	0.1447	0.154824	-0.753788	24	1.18027	-0.816162	24	1.14483	0.458309	0.422435	-1.08223	0.324562	0	0	0	0	0	0	0			0
1316	WBGene00001707	2.26855	3.35764	2.69764	2.55164	2.09436	3.04373	2.42536	2.60055	4	4	2.71886	2.541	0.461603	0.395448	0.989872	0.923509	0.164299	0.15528	0.408816	0.375912	0.134362	0.13989	-0.640518	24	1.18272	-0.684278	24	1.08397	0.527905	0.500355	-1.07	0.352748	0	0	0	0	0	0	0			0
1317	WBGene00001708	4.13644	4.04144	3.83089	4.02078	4.43356	4.27578	4.273	4.35322	4	4	4.00739	4.33389	0.127993	0.0761393	1.38775	1.46635	0.0322268	0.0175037	0.267979	0.266097	0.0717152	0.0623626	1.72911	24	1.0142	1.65402	24	1.32243	0.0966341	0.111144	1.08147	0.124367	0	0	0	0	0	0	0			0
1318	WBGene00001709	3.21271	3.63582	3.16235	3.19559	3.98224	4.25065	4.02224	3.89718	4	4	3.30162	4.03807	0.223782	0.151006	1.19276	1.39525	0.0657126	0.0369759	0.373372	0.289072	0.107986	0.0704008	3.11928	24	1.66829	3.14165	24	2.35279	0.00466636	0.00442187	1.22306	0.015579	0	0	0	0	0	0	0			0
1319	WBGene00001710	2.626	3.728	2.674	2.656	2.019	3.238	4.099	2.481	4	4	2.921	2.95925	0.538364	0.910956	1.06043	1.04924	0.170457	0.308982	0.395557	0.559337	0.136501	0.189889	0.111667	24	1.99953	-0.0957144	24	1.9352	0.912016	0.924542	1.01309	0.472866	0	0	0	0	0	0	0			0
1320	WBGene00001711	2.445	2.655	2.877	2.478	2.4	2.5	2.45	2.271	4	4	2.61375	2.40525	0.198248	0.0983713	0.958672	0.877017	0.0746881	0.0413699	0.304842	0.272707	0.126734	0.117582	-1.01951	24	1.24956	-0.944656	24	1.16174	0.318129	0.354248	-1.08669	0.262282	0	0	0	0	0	0	0			0
1321	WBGene00001712	1.315	2.433	2.243	1.301	1.807	2.082	1.737	1.681	4	4	1.823	1.82675	0.599735	0.177802	0.558477	0.599136	0.336524	0.0942159	0.377372	0.232647	0.210843	0.124985	0.0169177	24	2.63115	0.33177	24	2.84578	0.986642	0.742943	1.00206	0.492609	0	0	0	0	0	0	0			0
1322	WBGene00001713	3.118	4.046	3.965	3.353	3.407	3.818	3.661	3.536	4	4	3.6205	3.6055	0.455995	0.175565	1.28057	1.28157	0.127385	0.0486321	0.375561	0.310447	0.10442	0.0827266	-0.0615686	24	1.46348	0.0150486	24	1.59324	0.951416	0.988118	-1.00416	0.483446	0	0	0	0	0	0	0			0
1323	WBGene00001714	2.781	4.456	3.846	3.18	2.836	3.862	3.253	2.601	4	4	3.56575	3.138	0.738404	0.552863	1.25524	1.13226	0.207566	0.172576	0.481804	0.39594	0.131084	0.127931	-1.37183	24	1.48075	-1.34285	24	1.0499	0.182806	0.191885	-1.13631	0.18665	0	0	1	0	0	0	0			0
1324	WBGene00001715	1.722	2.605	1.908	1.844	1.56	2.407	1.919	1.556	4	4	2.01975	1.8605	0.397722	0.402121	0.689728	0.604247	0.183495	0.20749	0.311957	0.304866	0.152394	0.168451	-0.730188	24	1.04706	-0.752617	24	1.22184	0.472343	0.458999	-1.0856	0.330485	0	0	0	1	0	0	0			0
1325	WBGene00001716	2.495	4.269	3.213	2.632	2.433	4.03	3.272	2.711	4	4	3.15225	3.1115	0.80694	0.704785	1.12515	1.1164	0.243196	0.221756	0.506136	0.46079	0.158846	0.149925	-0.11907	24	1.2065	-0.080135	24	1.12254	0.906211	0.936794	-1.0131	0.471214	0	0	0	0	0	0	0			0
1326	WBGene00001717	0.893	0.637	0.768	1.051	0.659	1.067	1.102	0.941	4	4	0.83725	0.94225	0.176723	0.201093	-0.194594	-0.0789665	0.213603	0.23545	0.188535	0.2113	0.243396	0.244969	0.741568	24	1.25606	0.66967	24	1.01297	0.465545	0.50946	1.12541	0.327412	0	0	0	0	0	0	0			0
1327	WBGene00001718	2.174	4.127	3.146	2.594	2.545	3.52	3.366	2.741	4	4	3.01025	3.043	0.844223	0.472957	1.07336	1.10366	0.274643	0.156958	0.558352	0.388473	0.176233	0.13461	0.0962955	24	2.06583	0.273237	24	1.71403	0.924085	0.787008	1.01088	0.476267	0	0	0	1	0	0	0			0
1328	WBGene00001719	3.022	3.794	3.709	3.228	2.249	3.058	3.041	2.881	4	4	3.43825	2.80725	0.372976	0.380612	1.23049	1.02464	0.109535	0.145281	0.351282	0.363147	0.106382	0.126332	-2.49779	24	1.0687	-2.49275	24	1.41024	0.0197513	0.0199736	-1.22478	0.0424532	0	0	0	1	0	0	0			0
1329	WBGene00001720	2.32	2.726	2.068	2.392	2.081	2.434	1.747	2.131	4	4	2.3765	2.09825	0.271266	0.281351	0.860779	0.734219	0.113559	0.136277	0.302764	0.289738	0.12495	0.137655	-1.32796	24	1.09193	-1.36153	24	1.2137	0.196683	0.185991	-1.13261	0.195516	0	0	0	0	0	0	0			0
1330	WBGene00001721	2.53	2.63	2.073	1.791	2.741	2.51	1.884	1.836	4	4	2.256	2.24275	0.393559	0.452336	0.801744	0.792398	0.179388	0.202001	0.323643	0.344303	0.155785	0.164226	-0.0560805	24	1.13175	-0.0825719	24	1.1113	0.955742	0.934877	-1.00591	0.484408	0	0	0	1	0	0	0			0
1331	WBGene00001722	1.295	1.689	1.293	0.941	1.04	1.588	1.117	1.016	4	4	1.3045	1.19025	0.305611	0.268644	0.2447	0.157054	0.239279	0.207567	0.24415	0.248377	0.193787	0.213055	-0.656079	24	1.03493	-0.608647	24	1.20874	0.518015	0.548477	-1.09599	0.34871	0	0	0	0	0	0	0			0
1332	WBGene00001723	2.184	2.677	2.44325	2.28625	2.43925	2.69075	2.24725	2.42975	4	4	2.39763	2.45175	0.21461	0.182192	0.871524	0.894752	0.0883925	0.0737753	0.296725	0.291863	0.119945	0.127153	0.260086	24	1.03359	0.265761	24	1.12379	0.797016	0.792693	1.02257	0.441034	0	0	0	0	0	0	0			0
1333	WBGene00001724	1.918	3.333	2.57	2.565	2.254	3.015	2.382	1.951	4	4	2.5965	2.4005	0.578645	0.447759	0.935255	0.863147	0.225769	0.181047	0.413692	0.349215	0.157882	0.147742	-0.724075	24	1.40336	-0.666962	24	1.14198	0.476019	0.511158	-1.08165	0.331902	0	0	0	0	0	0	0			0
1334	WBGene00001725	2.83114	4.59286	4.13286	3.11657	3.15057	4.82657	4.26571	3.22743	4	4	3.66836	3.86757	0.831836	0.816919	1.28022	1.336	0.228687	0.210035	0.505972	0.498931	0.140706	0.128603	0.5607	24	1.02842	0.585269	24	1.19708	0.580199	0.56383	1.05431	0.37164	0	0	0	0	0	0	0			0
1335	WBGene00001726	2.70133	3.153	2.53967	2.55033	2.70933	3.10367	2.36	2.59933	4	4	2.73608	2.69308	0.287582	0.310149	1.00259	0.985801	0.101173	0.113669	0.358868	0.331477	0.128837	0.113271	-0.176038	24	1.1721	-0.195725	24	1.29373	0.861741	0.846473	-1.01597	0.458566	0	0	0	0	0	0	0			0
1336	WBGene00001727	1.973	2.251	2.527	2.055	1.919	1.713	1.875	1.851	4	4	2.2015	1.8395	0.246357	0.0889101	0.78456	0.608596	0.109812	0.0492185	0.306343	0.242864	0.134946	0.12646	-1.85198	24	1.59106	-1.90294	24	1.13871	0.0763699	0.0691118	-1.19679	0.107113	0	0	0	0	0	0	0			0
1337	WBGene00001728	2.214	3.905	2.692	2.44	2.081	3.107	2.667	2.776	4	4	2.81275	2.65775	0.753887	0.427604	1.00984	0.967118	0.248133	0.16903	0.507901	0.360664	0.171256	0.142036	-0.497648	24	1.98314	-0.383989	24	1.45377	0.623261	0.704368	-1.05832	0.386114	0	0	0	0	0	0	0			0
1338	WBGene00001729	2.4	5.933	3.629	2.469	2.036	6.151	3.602	2.256	4	4	3.60775	3.51125	1.64951	1.89108	1.21219	1.15567	0.423234	0.505779	0.877438	0.994356	0.23236	0.27504	-0.145535	24	1.28425	-0.31396	24	1.40109	0.885504	0.756264	-1.02748	0.46539	0	0	0	0	0	0	0			0
1339	WBGene00001730	2.55	3.814	3.123	2.608	3.95	4.051	3.085	2.526	4	4	3.02375	3.403	0.586411	0.727866	1.09304	1.20647	0.18721	0.223397	0.456536	0.483283	0.143117	0.146917	1.14091	24	1.1206	1.10608	24	1.05382	0.265166	0.279657	1.12542	0.235714	0	0	0	0	0	0	0			0
1340	WBGene00001731	2.375	3.51	2.853	2.762	1.829	2.613	2.652	2.566	4	4	2.875	2.415	0.471338	0.392246	1.04623	0.870483	0.16084	0.178319	0.405707	0.368086	0.135244	0.138796	-1.67944	24	1.21486	-1.81382	24	1.05321	0.106039	0.0822287	-1.19048	0.132094	0	0	0	0	0	0	0			0
1341	WBGene00001732	2.425	4.031	2.844	2.4635	2.6485	4.2685	3.344	2.146	4	4	2.94088	3.10175	0.750949	0.919943	1.05666	1.09901	0.236058	0.296595	0.488399	0.546359	0.162514	0.184714	0.439051	24	1.25143	0.344245	24	1.29186	0.664552	0.73366	1.0547	0.400568	0	0	0	1	0	0	0			0
1342	WBGene00001733	2.36	2.392	2.645	2.199	2.584	3.449	2.623	2.881	4	4	2.399	2.88425	0.184469	0.398896	0.872866	1.05247	0.0760814	0.13278	0.303636	0.351822	0.119843	0.123075	2.08831	24	1.34257	2.09103	24	1.05466	0.0475543	0.0472881	1.20227	0.0778067	0	0	0	0	0	0	0			0
1343	WBGene00001734	2.37985	3.27881	2.36804	2.21269	2.37512	3.70619	2.5105	2.18908	4	4	2.55985	2.69522	0.485322	0.68674	0.927697	0.969753	0.176346	0.233709	0.377128	0.459276	0.13867	0.163854	0.455599	24	1.4831	0.391847	24	1.3962	0.652774	0.698629	1.05288	0.396409	0	0	0	0	0	0	0			0
1344	WBGene00001735	2.39	2.706	2.243	2.435	2.478	2.304	1.889	2.286	4	4	2.4435	2.23925	0.193254	0.249035	0.891131	0.801237	0.0779392	0.115958	0.268228	0.290485	0.121833	0.129822	-1.03318	24	1.17284	-1.00984	24	1.13545	0.311821	0.322646	-1.09121	0.259442	0	0	0	0	0	0	0			0
1345	WBGene00001736	3.811	3.768	4.017	4.232	3.407	2.82	3.543	3.556	4	4	3.957	3.3315	0.213121	0.347594	1.37441	1.19904	0.0533692	0.109926	0.283371	0.345769	0.080302	0.105018	-2.79833	24	1.48889	-2.65302	24	1.71031	0.00996774	0.0139241	-1.18775	0.026603	0	0	1	0	0	0	0			0
1346	WBGene00001737	1.23	1.416	1.629	1.205	1.588	1.159	1.25	1.246	4	4	1.37	1.31075	0.196657	0.189542	0.307324	0.263279	0.140165	0.137307	0.221891	0.228481	0.162775	0.158368	-0.372063	24	1.06028	-0.387887	24	1.05642	0.713111	0.701518	-1.0452	0.415722	0	0	0	0	0	0	0			0
1347	WBGene00001738	2.164	1.801	2.187	2.151	1.544	1.067	1.973	1.801	4	4	2.07575	1.59625	0.18377	0.394419	0.727191	0.441781	0.0928198	0.270892	0.249765	0.277496	0.131571	0.196841	-2.56867	24	1.23438	-2.41092	24	2.23824	0.0168543	0.0239303	-1.30039	0.0381931	0	0	0	1	0	0	0			0
1348	WBGene00001739	2.008	2.134	1.922	1.993	1.801	1.772	1.52	2.506	4	4	2.01425	1.89975	0.0882057	0.423407	0.699536	0.624462	0.0434094	0.210514	0.249874	0.301616	0.117616	0.165462	-0.584668	24	1.45703	-0.739624	24	1.97909	0.564227	0.466702	-1.06027	0.36585	0	0	0	0	0	0	0			0
1349	WBGene00001740	4.499	4.375	4.754	4.962	3.497	3.493	3.848	4.341	4	4	4.6475	3.79475	0.2624	0.400388	1.53514	1.32958	0.0562753	0.102888	0.2123	0.349258	0.0484534	0.0947761	-4.17278	24	2.7064	-3.86229	24	3.82603	0.00034021	0.000745671	-1.22472	0.00250162	0	0	0	0	0	0	0			0
1350	WBGene00001743	5.362	5.352	5.402	5.275	4.42	4.442	4.547	5.026	4	4	5.34775	4.60875	0.0530935	0.283633	1.67664	1.52658	0.00995317	0.059979	0.174231	0.268838	0.0333872	0.0588477	-4.61357	24	2.38084	-4.4356	24	3.1067	0.00011094	0.000174473	-1.16035	0.00115271	0	0	0	0	0	0	0			0
1351	WBGene00001744	4.58071	4.2281	4.19848	4.45233	4.04829	3.86971	3.92643	4.16671	4	4	4.3649	4.00279	0.183151	0.132264	1.47294	1.38658	0.0418163	0.032925	0.222804	0.277575	0.0521313	0.073139	-2.03475	24	1.55208	-1.92295	24	1.96835	0.0530665	0.0664307	-1.09047	0.0837338	0	0	0	1	0	0	0			0
1352	WBGene00001745	4.86	5.129	4.773	4.703	5.825	5.717	5.635	5.541	4	4	4.86625	5.6795	0.186568	0.120746	1.58178	1.73669	0.0378797	0.0212482	0.201506	0.225128	0.0410611	0.0386969	5.3833	24	1.2482	5.49119	24	1.12592	1.58e-05	1.21e-05	1.16712	0.00028376	1	0	1	0	0	0	0		171687	0
1353	WBGene00001746	4.6975	4.742	4.7025	4.681	4.77	4.806	4.9065	4.9935	4	4	4.70575	4.869	0.0258538	0.101121	1.54877	1.58273	0.00548489	0.0207191	0.168983	0.277161	0.0347793	0.0516608	1.00581	24	2.69017	1.0904	24	2.20638	0.324539	0.286364	1.03469	0.265354	0	0	0	0	0	0	0			0
1354	WBGene00001747	5.388	5.24	5.241	4.924	5.293	5.082	5.197	5.401	4	4	5.19825	5.24325	0.195609	0.136016	1.64778	1.65669	0.0380921	0.0259605	0.184635	0.226475	0.0354542	0.043549	0.308008	24	1.50458	0.317209	24	1.50877	0.760734	0.753828	1.00866	0.431092	0	0	0	0	0	0	0			0
1355	WBGene00001748	5.257	5.701	5.317	5.328	5.573	5.473	5.024	5.391	4	4	5.40075	5.36525	0.202584	0.239364	1.68602	1.67918	0.0368877	0.0453795	0.186234	0.259997	0.0343288	0.050519	-0.222004	24	1.94902	-0.224051	24	2.16567	0.826189	0.824614	-1.00662	0.449157	0	0	0	0	0	0	0			0
1356	WBGene00001749	5.463	4.982	5.322	5.419	5.259	4.931	5.177	5.401	4	4	5.2965	5.192	0.217784	0.197075	1.6664	1.64657	0.0418309	0.0382504	0.200125	0.2443	0.0357469	0.0473378	-0.661802	24	1.49019	-0.668402	24	1.75364	0.514403	0.510255	-1.02013	0.347115	0	0	0	1	0	0	0			0
1357	WBGene00001750	2.43	3.025	2.56	2.742	2.685	3.46	3.912	3.661	4	4	2.68925	3.4295	0.257829	0.529657	0.985874	1.22268	0.0946481	0.164508	0.345244	0.409305	0.123487	0.119092	2.76488	24	1.40554	2.76069	24	1.07517	0.0107711	0.0108758	1.27526	0.0281203	0	1	0	0	0	0	0			0
1358	WBGene00001751	2.857	3.981	3.738	3.233	4.504	4.724	4.798	4.661	4	4	3.45225	4.67175	0.50452	0.125066	1.23082	1.54126	0.148868	0.026938	0.389979	0.248264	0.118263	0.0522186	5.27582	24	2.46748	4.80276	24	5.12915	2.07e-05	6.86e-05	1.35325	0.000347658	1	1	1	0	0	0	0		177883	0
1359	WBGene00001752	2.716	2.949	3.558	3.891	3.961	3.536	3.917	4.326	4	4	3.2785	3.935	0.541065	0.323049	1.17712	1.36737	0.165587	0.0825499	0.408207	0.343539	0.126639	0.083081	2.46098	24	1.41192	2.51213	24	2.32344	0.0214319	0.0191299	1.20024	0.0450075	0	1	1	1	0	0	0			0
1360	WBGene00001753	3.419	3.546	3.96	3.439	3.659	3.65	4.001	3.406	4	4	3.591	3.679	0.252239	0.244577	1.27665	1.301	0.068297	0.0659953	0.304698	0.306127	0.0909502	0.0885025	0.407483	24	1.00941	0.383782	24	1.05608	0.687265	0.704519	1.02451	0.408047	0	0	0	0	0	0	0			0
1361	WBGene00001754	2.917	3.5	3.974	3.285	2.713	3.292	3.292	3.461	4	4	3.419	3.1895	0.441417	0.327504	1.22311	1.15565	0.128885	0.107682	0.386642	0.339888	0.110111	0.120918	-0.891614	24	1.29403	-0.825042	24	1.20593	0.381452	0.417473	-1.07195	0.29166	0	0	0	0	0	0	0			0
1362	WBGene00001755	5.709	5.493	5.719	5.755	5.858	5.549	5.999	5.771	4	4	5.669	5.79425	0.118985	0.188569	1.73485	1.75647	0.0211958	0.0327191	0.147271	0.207825	0.0259062	0.0356976	0.98345	24	1.99141	0.980369	24	1.89876	0.335197	0.336684	1.02209	0.270154	0	0	0	0	0	0	0			0
1363	WBGene00001756	3.891	3.212	3.194	3.084	3.222	2.76	3.061	3.296	4	4	3.34525	3.08475	0.368206	0.237691	1.20327	1.12417	0.105151	0.078942	0.364077	0.32634	0.106685	0.102646	-1.0656	24	1.24464	-1.0685	24	1.08025	0.297208	0.295924	-1.08445	0.252258	0	0	0	0	0	0	0			0
1364	WBGene00001757	4.569	3.161	3.998	3.319	3.513	3.145	3.115	3.021	4	4	3.76175	3.1985	0.649203	0.216218	1.31391	1.16103	0.170273	0.0659022	0.438593	0.356916	0.109797	0.0988234	-1.99216	24	1.51005	-2.06991	24	1.23443	0.0578477	0.0493876	-1.1761	0.0884433	0	0	0	0	0	0	0			0
1365	WBGene00001758	3.464	3.783	3.629	4.006	3.413	3.324	3.597	3.836	4	4	3.7205	3.5425	0.230638	0.226293	1.31242	1.26332	0.0618023	0.0632448	0.30686	0.317006	0.0823281	0.0948892	-0.806894	24	1.06722	-0.781689	24	1.32842	0.427652	0.442041	-1.05025	0.311705	0	0	1	0	0	0	0			0
1366	WBGene00001759	2.204	3.156	2.612	2.651	1.935	2.19	2.047	2.061	4	4	2.65575	2.05825	0.389985	0.104376	0.968658	0.720894	0.146705	0.0506316	0.370496	0.262236	0.13878	0.127711	-2.63267	24	1.9961	-2.6274	24	1.18086	0.0145837	0.0147596	-1.2903	0.0345256	0	0	0	0	0	0	0			0
1367	WBGene00001760	2.611	2.291	2.707	2.69	2.433	2.418	2.519	2.571	4	4	2.57475	2.48525	0.193736	0.0724448	0.943526	0.910056	0.0779654	0.0290761	0.305024	0.268963	0.117135	0.110591	-0.440161	24	1.28612	-0.415541	24	1.12185	0.663759	0.681438	-1.03601	0.400291	0	0	0	0	0	0	0			0
1368	WBGene00001761	4.715	4.431	5.014	4.395	4.582	3.596	4.478	4.406	4	4	4.63875	4.2655	0.288213	0.452143	1.53302	1.44603	0.0614324	0.111961	0.224374	0.341223	0.0497256	0.08311	-1.82794	24	2.31278	-1.79646	24	2.79349	0.0800174	0.0850204	-1.0875	0.110231	0	0	1	0	0	0	0			0
1369	WBGene00001762	1.923	2.205	2.324	2.185	2.282	2.234	2.229	2.086	4	4	2.15925	2.20775	0.169029	0.0846104	0.76738	0.791412	0.0803966	0.0389109	0.241505	0.292716	0.128292	0.127983	0.255611	24	1.46906	0.265233	24	1.00484	0.800429	0.793095	1.02246	0.442061	0	0	0	0	0	0	0			0
1370	WBGene00001763	2.661	3.404	3.113	3.016	2.803	3.048	2.637	2.686	4	4	3.0485	2.7935	0.30646	0.183402	1.11079	1.02572	0.101885	0.064466	0.338509	0.339882	0.117404	0.107209	-1.06317	24	1.00812	-1.0702	24	1.19922	0.298284	0.295174	-1.09128	0.252864	0	0	1	0	0	0	0			0
1371	WBGene00001764	2.405	2.281	2.527	2.853	2.859	2.516	2.14	2.536	4	4	2.5165	2.51275	0.245788	0.294042	0.919392	0.916134	0.0956166	0.118919	0.288053	0.319421	0.124914	0.138572	-0.0174369	24	1.22965	-0.0349256	24	1.23063	0.986232	0.972428	-1.00149	0.492608	0	0	0	0	0	0	0			0
1372	WBGene00001765	2.44	1.79	1.794	2.219	1.879	2.89	2.14	2.416	4	4	2.06075	2.33125	0.323179	0.432239	0.71393	0.833729	0.155705	0.18315	0.276263	0.363476	0.149395	0.140212	1.18498	24	1.73103	1.16942	24	1.13527	0.247628	0.253717	1.13126	0.225876	0	0	0	0	0	0	0			0
1373	WBGene00001766	2.47	1.892	2.257	2.714	2.489	2.44	2.706	2.101	4	4	2.33325	2.434	0.348419	0.250289	0.838578	0.885441	0.153666	0.105366	0.319979	0.302964	0.143056	0.130124	0.457278	24	1.11547	0.484663	24	1.20864	0.651584	0.63231	1.04318	0.395987	0	0	0	0	0	0	0			0
1374	WBGene00001767	1.15	1.608	1.818	1.834	1.37	1.463	1.496	1.126	4	4	1.6025	1.36375	0.318757	0.167237	0.454747	0.304192	0.218404	0.129195	0.251694	0.203374	0.174831	0.167731	-1.47563	24	1.53163	-1.24283	24	1.08646	0.153044	0.225938	-1.17507	0.166575	0	0	0	0	0	0	0			0
1375	WBGene00001768	3.133	4.188	3.468	3.257	3.541	3.585	3.681	3.276	4	4	3.5115	3.52075	0.471726	0.173321	1.24965	1.25774	0.128711	0.0500965	0.361508	0.312696	0.102871	0.0863698	0.0387044	24	1.33657	0.120519	24	1.4186	0.969446	0.905076	1.00263	0.48801	0	0	0	0	0	0	0			0
1376	WBGene00001769	1.878	1.77	2.518	2.233	1.958	2.152	2.14	2.181	4	4	2.09975	2.10775	0.341856	0.101306	0.731999	0.744728	0.161285	0.0491848	0.332029	0.25034	0.143928	0.116837	0.0384774	24	1.75911	0.137319	24	1.51749	0.969625	0.891924	1.00381	0.48807	0	0	0	0	0	0	0			0
1377	WBGene00001770	4.529	3.445	3.638	3.651	4.358	2.82	3.115	3.571	4	4	3.81575	3.466	0.48474	0.670126	1.33347	1.22946	0.120979	0.188457	0.365673	0.458507	0.103792	0.135322	-1.19273	24	1.57219	-1.21974	24	1.69983	0.244633	0.234415	-1.10091	0.224073	0	1	0	0	0	0	0			0
1378	WBGene00001771	2.34	2.215	2.026	1.796	2.999	2.082	1.983	2.106	4	4	2.09425	2.2925	0.237055	0.473999	0.734257	0.815252	0.115552	0.19048	0.304654	0.364606	0.131923	0.147793	0.834503	24	1.4323	0.817689	24	1.25506	0.412227	0.421579	1.09466	0.305087	0	0	0	0	0	0	0			0
1379	WBGene00001772	3.635	3.338	3.265	2.594	5.187	4.046	3.843	2.586	4	4	3.208	3.9155	0.439497	1.06561	1.15811	1.33506	0.144233	0.288108	0.405096	0.607529	0.127006	0.161736	1.93782	24	2.24915	1.72096	24	1.62169	0.0644974	0.0981263	1.22054	0.095354	0	0	1	1	0	0	0			0
1380	WBGene00001773	1.792	1.709	1.633	1.551	2.165	1.61	2.003	1.856	4	4	1.67125	1.9085	0.103165	0.235642	0.51214	0.640431	0.061831	0.126234	0.222793	0.239432	0.132481	0.131838	1.45083	24	1.15494	1.37282	24	1.00979	0.159773	0.182503	1.14196	0.171129	0	0	0	0	0	0	0			0
1381	WBGene00001774	3.951	4.213	5.27	4.914	4.493	3.775	5.172	4.846	4	4	4.587	4.5715	0.610407	0.599034	1.51657	1.51308	0.133345	0.135891	0.364032	0.400103	0.0790926	0.0907368	-0.0573091	24	1.20799	-0.0578562	24	1.31612	0.954773	0.954342	-1.00339	0.484131	0	1	0	0	0	0	0			0
1382	WBGene00001775	4.705	4.987	5.549	5.135	4.924	4.751	5.354	5.121	4	4	5.094	5.0375	0.351888	0.259557	1.62629	1.61592	0.0686348	0.0514045	0.248176	0.251487	0.0467292	0.0498405	-0.319821	24	1.02686	-0.303627	24	1.1376	0.751872	0.764029	-1.01122	0.428582	0	0	0	0	0	0	0			0
1383	WBGene00001776	3.871	3.692	4.296	3.651	3.76	3.623	3.888	3.716	4	4	3.8775	3.74675	0.294899	0.110131	1.35309	1.32057	0.0741982	0.0293113	0.305628	0.323511	0.0753683	0.0825359	-0.587577	24	1.12045	-0.58201	24	1.19925	0.562305	0.565988	-1.0349	0.365299	0	0	0	0	0	0	0			0
1384	WBGene00001777	2.219	2.155	2.702	2.272	2.389	2.174	2.554	2.561	4	4	2.337	2.4195	0.247991	0.181946	0.844875	0.881376	0.101736	0.076912	0.301571	0.326509	0.118733	0.121823	0.371229	24	1.17222	0.429134	24	1.05273	0.713724	0.671654	1.0353	0.415917	0	1	0	0	0	0	0			0
1385	WBGene00001778	3.364	3.106	3.704	2.819	3.071	2.603	2.829	3.006	4	4	3.24825	2.87725	0.37665	0.209489	1.17307	1.0548	0.116127	0.0740872	0.378641	0.316301	0.116912	0.105398	-1.50394	24	1.43303	-1.50266	24	1.23042	0.145644	0.145972	-1.12894	0.161225	0	0	0	0	0	0	0			0
1386	WBGene00001779	2.53	1.952	2.338	2.315	2.405	2.163	2.549	2.261	4	4	2.28375	2.3445	0.241258	0.168716	0.821445	0.850139	0.109214	0.0717301	0.311082	0.280163	0.120332	0.113817	0.290223	24	1.2329	0.346475	24	1.11777	0.774139	0.732005	1.0266	0.435256	0	0	0	0	0	0	0			0
1387	WBGene00001780	2.435	2.21	2.631	2.598	2.086	2.098	2.135	2.026	4	4	2.4685	2.08625	0.192459	0.0452576	0.901261	0.735191	0.0797494	0.0217849	0.282521	0.24944	0.112784	0.124168	-2.0285	24	1.28283	-1.98006	24	1.21206	0.0537458	0.0592737	-1.18322	0.0844481	0	0	0	0	0	0	0			0
1388	WBGene00001781	3.078	2.863	3.005	2.637	3.01	2.782	2.834	2.256	4	4	2.89575	2.7205	0.194229	0.324672	1.06152	0.995098	0.0682536	0.125589	0.342939	0.333291	0.112095	0.122334	-0.732934	24	1.05873	-0.800596	24	1.19102	0.470697	0.43122	-1.06442	0.329929	0	0	0	0	0	0	0			0
1389	WBGene00001782	3.033	2.504	2.409	2.353	3.2	2.755	2.775	2.286	4	4	2.57475	2.754	0.311793	0.373444	0.940586	1.00601	0.115526	0.137934	0.328572	0.36223	0.130118	0.127535	0.733053	24	1.21537	0.718118	24	1.04091	0.470626	0.479617	1.06962	0.32991	0	0	0	0	0	0	0			0
1390	WBGene00001783	2.219	2.114	2.773	2.964	2.506	2.57	2.815	2.601	4	4	2.5175	2.623	0.414953	0.133973	0.913027	0.963363	0.165354	0.0501885	0.334921	0.272608	0.135947	0.115263	0.488605	24	1.50942	0.564832	24	1.3911	0.629556	0.57743	1.04191	0.388443	0	0	0	0	0	0	0			0
1391	WBGene00001784	3.856	4.335	4.385	4.126	3.81	4.095	4.355	4.151	4	4	4.1755	4.10275	0.240736	0.224886	1.42796	1.41052	0.058522	0.0553035	0.313136	0.293466	0.0632092	0.0742407	-0.339036	24	1.13854	-0.357832	24	1.37951	0.737531	0.723597	-1.01773	0.42376	0	0	0	0	0	0	0			0
1392	WBGene00001785	2.44	2.2	2.371	1.873	2.299	1.696	1.934	2.166	4	4	2.221	2.02375	0.252986	0.265501	0.792827	0.698305	0.118521	0.134131	0.291602	0.271346	0.13785	0.148289	-0.990406	24	1.15487	-0.933714	24	1.15718	0.331856	0.359751	-1.09747	0.268602	0	0	0	0	0	0	0			0
1393	WBGene00001786	2.812	2.595	3.019	2.435	2.931	2.63	3.041	2.621	4	4	2.71525	2.80575	0.254706	0.212956	0.995589	1.02952	0.0937131	0.075709	0.35714	0.333371	0.11949	0.117035	0.370481	24	1.14768	0.405708	24	1.0424	0.714274	0.688552	1.03333	0.416018	0	0	0	0	0	0	0			0
1394	WBGene00001787	2.576	2.782	3.388	2.69	3.463	2.993	3.287	3.011	4	4	2.859	3.1885	0.362593	0.227141	1.0448	1.15766	0.121127	0.0707487	0.385978	0.316668	0.127293	0.108605	1.31996	24	1.48565	1.34906	24	1.37376	0.1993	0.189909	1.11525	0.197225	0	0	1	0	0	0	0			0
1395	WBGene00001788	2.234	3.111	2.967	2.771	2.226	2.972	2.785	3.076	4	4	2.77075	2.76475	0.384007	0.37881	1.01137	1.00933	0.146314	0.145378	0.366118	0.378206	0.137757	0.136403	-0.022797	24	1.06712	-0.0210928	24	1.01995	0.982001	0.983346	-1.00217	0.49143	0	0	0	0	0	0	0			0
1396	WBGene00001789	3.314	3.617	3.955	3.093	3.222	3.189	3.622	2.966	4	4	3.49475	3.24975	0.374544	0.272974	1.24698	1.17599	0.106691	0.0826865	0.352063	0.317258	0.10039	0.0989721	-1.03393	24	1.23144	-1.00718	24	1.02887	0.311476	0.323895	-1.07539	0.259283	0	0	0	0	0	0	0			0
1397	WBGene00001790	3.143	3.834	4.267	3.824	3.273	3.558	4.178	3.996	4	4	3.767	3.75125	0.46444	0.411536	1.32032	1.31751	0.127443	0.110931	0.375631	0.375643	0.0974796	0.0966946	-0.0592962	24	1.00007	-0.0410125	24	1.0163	0.953207	0.967625	-1.0042	0.483752	0	0	0	0	0	0	0			0
1398	WBGene00001791	4.087	3.981	4.471	4.266	3.676	3.384	3.956	4.046	4	4	4.20125	3.7655	0.21488	0.299178	1.43441	1.32346	0.0508677	0.0807549	0.267565	0.340429	0.0649037	0.0877538	-2.01274	24	1.6188	-2.03297	24	1.82807	0.0554921	0.0532596	-1.11572	0.0863156	0	1	0	0	0	0	0			0
1399	WBGene00001792	2.114	1.416	1.846	2.233	1.264	1.007	1.294	1.351	4	4	1.90225	1.229	0.362324	0.152335	0.628196	0.19996	0.203308	0.131576	0.273349	0.212661	0.157412	0.187598	-3.88791	24	1.65219	-3.49736	24	1.4203	0.000699107	0.00185443	-1.5478	0.00413671	0	0	0	0	0	0	0			0
1400	WBGene00001793	5.25383	5.26167	4.97456	5.15617	5.52989	5.619	5.28578	5.261	4	4	5.16156	5.42392	0.133586	0.177869	1.64098	1.69042	0.0261126	0.0327515	0.179277	0.243345	0.0343721	0.047028	1.73603	24	1.84246	1.69723	24	1.87198	0.0953806	0.102587	1.05083	0.123384	0	1	0	0	0	0	0			0
1401	WBGene00001794	4.17383	4.53217	4.49717	4.45067	5.67433	5.27317	5.06133	5.29017	4	4	4.41346	5.32475	0.163201	0.255247	1.48413	1.67152	0.0376083	0.0474405	0.208737	0.275569	0.0473111	0.0506074	5.27214	24	1.74286	5.40956	24	1.1442	2.09e-05	1.48e-05	1.20648	0.000349353	1	1	1	1	0	0	0		177897	0
1402	WBGene00001795	2.84487	3.5296	3.60216	3.39462	2.46433	2.89784	3.30747	3.41209	4	4	3.34281	3.02043	0.342919	0.432077	1.20261	1.09735	0.107581	0.14829	0.356971	0.378771	0.107206	0.13034	-1.2388	24	1.12587	-1.2474	24	1.47815	0.227401	0.224285	-1.10673	0.213941	0	0	0	0	0	1	0			0
1403	WBGene00001796	2.36267	2.45474	2.61886	2.25843	2.35348	2.31633	2.4334	2.31695	4	4	2.42367	2.35504	0.15285	0.0550526	0.883805	0.856356	0.0626868	0.0231824	0.285012	0.265604	0.114726	0.121595	-0.352328	24	1.15148	-0.328384	24	1.12334	0.727668	0.745469	-1.02914	0.42078	0	0	0	0	0	0	0			0
1404	WBGene00001803	2.817	2.964	3.076	2.55	2.971	2.744	2.603	2.396	4	4	2.85175	2.6785	0.227412	0.241766	1.04548	0.982195	0.081353	0.0904209	0.336789	0.327911	0.116877	0.120868	-0.737146	24	1.05489	-0.752834	24	1.06945	0.468179	0.458871	-1.06468	0.32869	0	0	0	0	0	0	0			0
1405	WBGene00001804	2.48	2.514	2.489	2.608	2.254	2.32	2.593	2.706	4	4	2.52275	2.46825	0.0586252	0.216001	0.92515	0.90064	0.0230211	0.0874399	0.27214	0.31471	0.111533	0.128113	-0.261984	24	1.33732	-0.288583	24	1.3194	0.79557	0.775379	-1.02208	0.440713	0	0	0	1	0	0	0			0
1406	WBGene00001805	1.8775	1.9395	1.962	1.7695	2.372	3.17	3.275	2.9235	4	4	1.88712	2.93513	0.0861736	0.403289	0.634258	1.06914	0.0462922	0.145019	0.236265	0.376614	0.123706	0.133366	4.71447	24	2.54093	4.7814	24	1.16227	8.58e-05	7.24e-05	1.55534	0.000960361	1	0	0	0	0	0	0		191664	0
1407	WBGene00001806	2.711	3.156	2.815	2.646	2.618	2.103	2.805	2.871	4	4	2.832	2.59925	0.226938	0.347753	1.03866	0.94796	0.0780386	0.141911	0.324083	0.31658	0.128482	0.13294	-1.02748	24	1.04796	-0.98116	24	1.0706	0.314437	0.336302	-1.08955	0.260648	0	0	0	0	0	0	0			0
1408	WBGene00001808	4.931	4.836	5.09	5.135	5.008	4.665	4.887	4.971	4	4	4.998	4.88275	0.139004	0.153741	1.60875	1.58533	0.0278775	0.0318528	0.184402	0.285215	0.0353595	0.0554688	-0.678671	24	2.39228	-0.711937	24	2.46085	0.503839	0.483367	-1.0236	0.342959	0	0	0	0	0	0	0			0
1409	WBGene00001811	2.68933	2.44227	2.3454	2.4612	2.23267	2.14707	2.1296	2.13633	4	4	2.48455	2.16142	0.145639	0.0480415	0.908831	0.770581	0.0576548	0.0220023	0.294579	0.265617	0.121456	0.127288	-1.62932	24	1.22996	-1.57159	24	1.09834	0.116302	0.129137	-1.1495	0.140258	0	0	1	0	0	0	0			0
1410	WBGene00001812	5.51636	5.29273	5.32277	5.523	5.15882	4.46818	4.7595	4.96714	4	4	5.41372	4.83841	0.123002	0.29582	1.68874	1.57517	0.0227299	0.0616448	0.164011	0.284682	0.0300102	0.0648852	-3.50212	24	3.01283	-3.17735	24	4.6747	0.00183273	0.00405691	-1.1189	0.00808229	0	0	0	0	0	0	0			0
1411	WBGene00001813	3.654	3.52733	3.49356	3.76922	2.69822	2.93122	3.09956	3.22267	4	4	3.61103	2.98792	0.126064	0.227089	1.28354	1.09237	0.0347429	0.0770585	0.316067	0.36142	0.084792	0.105515	-2.5956	24	1.30757	-2.82453	24	1.54852	0.0158613	0.00937841	-1.20854	0.0366194	0	0	0	0	0	0	0			0
1412	WBGene00001814	2.83963	3.49237	3.58868	3.39668	2.71053	3.20011	3.48211	3.45732	4	4	3.32934	3.21251	0.335752	0.358121	1.19871	1.16211	0.105767	0.116439	0.365622	0.38495	0.103789	0.111302	-0.440108	24	1.10852	-0.48094	24	1.15003	0.663797	0.634915	-1.03637	0.400291	0	0	0	0	0	0	0			0
[truncated: 18,889 more rows]

## Sheet: unc-120 total
Supplemental Table 1
Related to Figure 6
List of 20,301 C. elegans genes analyzed in this study.
[truncated: 20,305 more rows]

## Sheet: unc-120 muscle
Supplemental Table 1
[truncated: 20,307 more rows]
