# Supplementary material for: Cell-type-specific nuclei purification from whole animals for genome-wide expression and chromatin profiling
Source: HighWire-hosted journal article supplement (doi:10.1101/gr.131748.111), 2012-01-04
Supplement: Steiner131748_SupTable2_r2.xlsx [file Steiner131748_SupTable2_r2.xlsx]

## Sheet: GO term analysis
Supplemental Table 2
Related to Figure 5
Results from GO term analysis on significantly enriched (as determined by Cyber-T analysis; Suppl. Table 1) C. elegans genes, as output by the GeneCodis program.
Only single GO terms are shown, combinations of multiple GO terms were omitted.
GO term number	GO term ("celular component" or "biological process")	number of genes with this GO term in dataset	total number of genes in dataset	number of genes for this GO term in reference	total number of genes in reference	Hypergeometric pValue	Corrected hypergeometric pValue
GO:16021	integral to membrane (CC)	259	880	6727	45461	3.44338e-29	2.61008e-26
GO:55120	striated muscle dense body (CC)	19	880	25	45461	3.69459e-28	1.40025e-25
GO:16020	membrane (CC)	76	880	1078	45461	4.5615e-22	1.15254e-19
GO:31430	M band (CC)	13	880	17	45461	1.08785e-19	1.64917e-17
GO:40011	locomotion (BP)	81	880	1415	45461	5.70943e-18	6.18249e-16
GO:71688	striated muscle myosin thick filament assembly (BP)	24	880	141	45461	5.12201e-16	4.31387e-14
GO:5615	extracellular space (CC)	17	880	86	45461	7.38584e-13	4.66539e-11
GO:6937	regulation of muscle contraction (BP)	8	880	10	45461	8.30679e-13	4.8435e-11
GO:5604	basement membrane (CC)	8	880	12	45461	8.82864e-12	4.4614e-10
GO:5578	proteinaceous extracellular matrix (CC)	9	880	23	45461	2.34838e-10	1.0471e-08
GO:61199	striated muscle contraction involved in embryonic body morphogenesis (BP)	7	880	11	45461	3.06761e-10	1.2918e-08
GO:40017	positive regulation of locomotion (BP)	19	880	160	45461	3.68726e-10	1.39747e-08
GO:43051	regulation of pharyngeal pumping (BP)	10	880	36	45461	1.13198e-09	3.90018e-08
GO:40012	regulation of locomotion (BP)	8	880	20	45461	1.95833e-09	5.93766e-08
GO:31674	I band (CC)	5	880	5	45461	2.68764e-09	7.02492e-08
GO:45214	sarcomere organization (BP)	6	880	9	45461	4.13449e-09	9.79357e-08
GO:7517	muscle organ development (BP)	7	880	15	45461	5.59028e-09	1.2463e-07
GO:18991	oviposition (BP)	26	880	346	45461	5.7014e-09	1.20046e-07
GO:31672	A band (CC)	5	880	6	45461	1.58671e-08	2.93349e-07
GO:8305	integrin complex (CC)	5	880	7	45461	5.46445e-08	7.96549e-07
GO:5886	plasma membrane (CC)	16	880	158	45461	8.67237e-08	1.17387e-06
GO:45202	synapse (CC)	9	880	43	45461	1.14588e-07	1.49755e-06
GO:6810	transport (BP)	25	880	381	45461	1.5491e-07	1.70177e-06
GO:46662	regulation of oviposition (BP)	8	880	33	45461	1.72738e-07	1.81854e-06
GO:15629	actin cytoskeleton (CC)	5	880	9	45461	3.17444e-07	3.16609e-06
GO:6468	protein phosphorylation (BP)	26	880	432	45461	4.65906e-07	4.52765e-06
GO:7626	locomotory behavior (BP)	6	880	18	45461	7.87068e-07	6.34678e-06
GO:7165	signal transduction (BP)	14	880	144	45461	9.03868e-07	7.21192e-06
GO:6508	proteolysis (BP)	23	880	364	45461	9.22803e-07	7.2863e-06
GO:5856	cytoskeleton (CC)	6	880	19	45461	1.13145e-06	8.66301e-06
GO:7155	cell adhesion (BP)	8	880	42	45461	1.25903e-06	9.44898e-06
GO:31012	extracellular matrix (CC)	6	880	20	45461	1.58983e-06	1.16999e-05
GO:5887	integral to plasma membrane (CC)	9	880	58	45461	1.66984e-06	1.21706e-05
GO:2119	nematode larval development (BP)	71	880	2044	45461	1.83414e-06	1.32407e-05
GO:5737	cytoplasm (CC)	30	880	586	45461	1.86e-06	1.33007e-05
GO:19915	lipid storage (BP)	30	880	598	45461	2.78901e-06	1.83832e-05
GO:7010	cytoskeleton organization (BP)	5	880	13	45461	3.03986e-06	1.93631e-05
GO:6099	tricarboxylic acid cycle (BP)	5	880	13	45461	3.03986e-06	1.93631e-05
GO:8340	determination of adult lifespan (BP)	35	880	779	45461	4.99259e-06	2.93363e-05
GO:6816	calcium ion transport (BP)	6	880	24	45461	5.16753e-06	2.99007e-05
GO:40024	dauer larval development (BP)	8	880	57	45461	1.36486e-05	5.68441e-05
GO:43005	neuron projection (CC)	7	880	45	45461	2.37818e-05	9.53787e-05
GO:16459	myosin complex (CC)	5	880	19	45461	2.4937e-05	9.89647e-05
GO:40039	inductive cell migration (BP)	12	880	144	45461	2.58492e-05	0.000101522
GO:3	reproduction (BP)	68	880	2105	45461	3.11505e-05	0.000112438
GO:30036	actin cytoskeleton organization (BP)	5	880	20	45461	3.27194e-05	0.000115894
GO:30424	axon (CC)	9	880	84	45461	3.69017e-05	0.0001301
GO:8152	metabolic process (BP)	25	880	527	45461	4.58447e-05	0.000153085
GO:31594	neuromuscular junction (CC)	4	880	12	45461	6.09836e-05	0.000198393
GO:42493	response to drug (BP)	4	880	12	45461	6.09836e-05	0.000198393
GO:30017	sarcomere (CC)	3	880	5	45461	7.02141e-05	0.000212889
GO:7271	synaptic transmission, cholinergic (BP)	5	880	24	45461	8.41228e-05	0.000252036
GO:43050	pharyngeal pumping (BP)	5	880	25	45461	0.000103482	0.000306402
GO:7186	G-protein coupled receptor protein signaling pathway (BP)	17	880	305	45461	0.000111375	0.000328492
GO:6096	glycolysis (BP)	4	880	14	45461	0.00011957	0.000347256
GO:43025	neuronal cell body (CC)	8	880	78	45461	0.000135583	0.000390769
GO:30334	regulation of cell migration (BP)	6	880	43	45461	0.000171195	0.000460162
GO:16477	cell migration (BP)	8	880	81	45461	0.000176782	0.000473502
GO:9952	anterior/posterior pattern formation (BP)	4	880	16	45461	0.000210793	0.000558674
GO:6898	receptor-mediated endocytosis (BP)	29	880	722	45461	0.000217509	0.000574466
GO:40018	positive regulation of multicellular organism growth (BP)	18	880	358	45461	0.000254212	0.00064231
GO:40007	growth (BP)	52	880	1661	45461	0.000543912	0.00123809
GO:7411	axon guidance (BP)	6	880	54	45461	0.000605745	0.00135845
GO:35262	gonad morphogenesis (BP)	4	880	21	45461	0.000641829	0.00142253
GO:7067	mitosis (BP)	6	880	55	45461	0.000668904	0.00147822
GO:5623	cell (CC)	4	880	22	45461	0.000772498	0.0016778
GO:7413	axonal fasciculation (BP)	7	880	81	45461	0.000999389	0.00210427
GO:5622	intracellular (CC)	28	880	763	45461	0.00110916	0.00227227
GO:30421	defecation (BP)	5	880	42	45461	0.0012632	0.00256704
GO:9792	embryo development ending in birth or egg hatching (BP)	87	880	3236	45461	0.00126873	0.00257138
GO:5764	lysosome (CC)	4	880	26	45461	0.00148485	0.00293868
GO:5576	extracellular region (CC)	9	880	140	45461	0.00168814	0.00329796
GO:5634	nucleus (CC)	34	880	1044	45461	0.0025542	0.00471067
GO:9791	post-embryonic development (BP)	3	880	15	45461	0.00276401	0.00501225
GO:9986	cell surface (CC)	3	880	18	45461	0.00474758	0.00796166
GO:40035	hermaphrodite genitalia development (BP)	26	880	769	45461	0.00482908	0.00808045
GO:5975	carbohydrate metabolic process (BP)	10	880	196	45461	0.00513297	0.00855119
GO:45138	tail tip morphogenesis (BP)	5	880	58	45461	0.00528253	0.00876183
GO:6915	apoptosis (BP)	5	880	62	45461	0.00700506	0.0112259
GO:32940	secretion by cell (BP)	5	880	63	45461	0.00749032	0.011878
GO:40010	positive regulation of growth rate (BP)	45	880	1586	45461	0.00750223	0.011872
GO:50804	regulation of synaptic transmission (BP)	4	880	45	45461	0.0110838	0.0167029
GO:6355	regulation of transcription, DNA-dependent (BP)	22	880	666	45461	0.0115674	0.0173283
GO:7188	G-protein signaling, coupled to cAMP nucleotide second messenger (BP)	3	880	25	45461	0.0121059	0.0179574
GO:6629	lipid metabolic process (BP)	6	880	109	45461	0.0195433	0.0277412
GO:55114	oxidation-reduction process (BP)	15	880	440	45461	0.0259285	0.0357993
GO:10171	body morphogenesis (BP)	19	880	609	45461	0.0299864	0.0405887
GO:5739	mitochondrion (CC)	4	880	61	45461	0.0305312	0.0411791
GO:45454	cell redox homeostasis (BP)	4	880	61	45461	0.0305312	0.0411791
