# Supplementary material for: Cell-type-specific nuclei purification from whole animals for genome-wide expression and chromatin profiling
Source: HighWire-hosted journal article supplement (doi:10.1101/gr.131748.111), 2012-01-04
Supplement: Steiner131748_SupTable3_r2.docx [file Steiner131748_SupTable3_r2.docx]

| **Supplemental Table 3** | |  |
| --- | --- | --- |
| Primer sequences used for qPCR. | |  |
|  |  |  |
| **Gene** | **Forward Primer** | **Reverse Primer** |
| *twi* | GAGGAGACGGACGAGTTCAG | GGCACAGGAAGTCAATGTATCTT |
| *Mef2* | GCCAGGTGCGAGAGACTAGA | ATCAACGACAGAGCCAGACA |
| *bap* | ACCAGCAACGATTCCGACT | CGCTCCAACTCGAAGACCT |
| *tin* | CTACGGGCATATCGATGGC | TGAGGTACTGGTGGGGATTC |
| *RpL32* | TACAGGCCCAAGATCGTGAA | TCTCCTTGCGCTTCTTGGA |
